# Supplementary material for: Dynamic Transcriptomic Analysis of Breast Muscle Development From the Embryonic to Post-hatching Periods in Chickens
Source: Front Genet. 2020 Jan 10;10:1308. doi: 10.3389/fgene.2019.01308 (PMC6967404; doi:10.3389/fgene.2019.01308)
Supplement: Supplementary file 2 [file Table_2.xlsx]

## Sheet: E17VSE12
Table S2. List of identified DEGs from pairwise comparisons (E17 VS E12)
gene_id	gene_name	transcript_id	GO	KEGG	KO_ENTRY	EC	Description	FPKM.E17_1	FPKM.E17_2	FPKM.E12_1	FPKM.E12_2	FPKM.E12_3	fc	log2(fc)	pval	qval	regulation	significant
ENSGALG00000008914	NRAP	ENSGALT00000014498	GO:0030016(myofibril);GO:0005927(muscle tendon junction);GO:0005916(fascia adherens);GO:0051371(muscle alpha-actinin binding);GO:0017166(vinculin binding);GO:0003779(actin binding);GO:0046872(metal ion binding)	NA	NA	NA	nebulin related anchoring protein [Source:HGNC Symbol;Acc:HGNC:7988]	122.584	119.273	9.64459	10.5602	9.40145	8.16913	3.03018	1.08858e-191	7.22326e-188	up	yes
ENSGALG00000011086	ACTA1	ENSGALT00000088724;ENSGALT00000066093;ENSGALT00000046635;ENSGALT00000079340;ENSGALT00000083831;ENSGALT00000018064	GO:0005865(striated muscle thin filament);GO:0001725(stress fiber);GO:0048741(skeletal muscle fiber development);GO:0030240(skeletal muscle thin filament assembly);GO:0030017(sarcomere);GO:0005884(actin filament);GO:0005615(extracellular space);GO:0015629(actin cytoskeleton);GO:0070062(extracellular exosome);GO:0072562(blood microparticle);GO:0005515(protein binding);GO:0005856(cytoskeleton);GO:0…	NA	NA	NA	Actin, alpha skeletal muscle [Source:UniProtKB/Swiss-Prot;Acc:P68139]	5020.37	6247.03	289.15	338.359	311.702	11.9967	3.58456	1.53595e-189	6.79453e-186	up	yes
ENSGALG00000043448	ABLIM2	ENSGALT00000071462	GO:0015629(actin cytoskeleton)	NA	NA	NA	actin binding LIM protein family member 2 [Source:HGNC Symbol;Acc:HGNC:19195]	68.1045	68.1315	3.72363	3.23948	2.76138	14.0096	3.80834	4.77526e-188	1.58431e-184	up	yes
ENSGALG00000034741	ETNPPL	ENSGALT00000066078	NA	00564(Glycerophospholipid metabolism)	K14286	EC:4.2.3.2	ethanolamine-phosphate phospho-lyase [Source:HGNC Symbol;Acc:HGNC:14404]	65.6755	64.5648	5.53546	4.3914	5.01725	8.71516	3.12353	1.30219e-170	3.45627e-167	up	yes
ENSGALG00000038540	ZBTB16	ENSGALT00000048122	NA	NA	NA	NA	zinc finger and BTB domain containing 16 [Source:HGNC Symbol;Acc:HGNC:12930]	18.4913	19.6783	0	0.077792	0	490.662	8.93859	1.26472e-167	2.79736e-164	up	yes
ENSGALG00000008141	COL4A5	ENSGALT00000013221	GO:0031594(neuromuscular junction);GO:0005605(basal lamina);GO:0005604(basement membrane);GO:0005587(collagen type IV trimer);GO:0005581(collagen trimer);GO:0038063(collagen-activated tyrosine kinase receptor signaling pathway);GO:0007528(neuromuscular junction development);GO:0005201(extracellular matrix structural constituent);GO:0005578(proteinaceous extracellular matrix);GO:0005576(extracellu…	04512(ECM-receptor interaction);04510(Focal adhesion);04933(AGE-RAGE signaling pathway in diabetic complications)	K06237	NA	collagen type IV alpha 5 chain [Source:HGNC Symbol;Acc:HGNC:2207]	71.1729	76.2299	8.08234	6.60209	7.48905	6.64771	2.73286	5.44873e-161	1.033e-157	up	yes
ENSGALG00000009705	RYR3	ENSGALT00000068256;ENSGALT00000077897;ENSGALT00000005352	GO:0006816(calcium ion transport);GO:0015278(calcium-release channel activity);GO:0005219(ryanodine-sensitive calcium-release channel activity);GO:0005262(calcium channel activity);GO:0070588(calcium ion transmembrane transport);GO:0051209(release of sequestered calcium ion into cytosol);GO:0005509(calcium ion binding);GO:0006811(ion transport);GO:0005216(ion channel activity);GO:0006874(cellular…	04371(Apelin signaling pathway);04020(Calcium signaling pathway);04020(Calcium signaling pathway)	K04963	NA	ryanodine receptor 3 [Source:HGNC Symbol;Acc:HGNC:10485]	71.2442	78.027	8.79962	7.83164	7.87095	6.09216	2.60695	2.40825e-160	3.99498e-157	up	yes
ENSGALG00000007786	DOK5	ENSGALT00000012627	GO:0051386(regulation of neurotrophin TRK receptor signaling pathway);GO:0007399(nervous system development);GO:0007169(transmembrane receptor protein tyrosine kinase signaling pathway);GO:0000165(MAPK cascade);GO:0005057(signal transducer activity, downstream of receptor);GO:0005158(insulin receptor binding);GO:0005622(intracellular)	NA	NA	NA	docking protein 5 [Source:HGNC Symbol;Acc:HGNC:16173]	50.1132	51.2432	0.740423	0.421099	0.233123	72.6754	6.18339	3.65209e-159	5.38521e-156	up	yes
ENSGALG00000013022	CACNA1C	ENSGALT00000021261;ENSGALT00000054139	GO:1990454(L-type voltage-gated calcium channel complex);GO:0016021(integral component of membrane);GO:0014069(postsynaptic density);GO:0005891(voltage-gated calcium channel complex);GO:0005886(plasma membrane);GO:0005737(cytoplasm);GO:0098912(membrane depolarization during atrial cardiac muscle cell action potential);GO:0086091(regulation of heart rate by cardiac conduction);GO:0098911(regulatio…	NA	NA	NA	calcium voltage-gated channel subunit alpha1 C [Source:HGNC Symbol;Acc:HGNC:1390]	100.877	86.7546	7.96608	8.16895	9.4637	7.32973	2.87376	1.00724e-157	1.33671e-154	up	yes
ENSGALG00000009435	PPP1R3A	ENSGALT00000088828;ENSGALT00000088518;ENSGALT00000015362	GO:0016021(integral component of membrane);GO:0016020(membrane);GO:0016020(membrane)	NA	NA	NA	protein phosphatase 1 regulatory subunit 3A [Source:HGNC Symbol;Acc:HGNC:9291]	73.6776	56.5391	6.75463	6.36118	6.41678	6.66664	2.73696	2.0044e-137	2.41822e-134	up	yes
ENSGALG00000034427	SCN4A	ENSGALT00000053422	GO:0001518(voltage-gated sodium channel complex);GO:0060078(regulation of postsynaptic membrane potential);GO:0035725(sodium ion transmembrane transport);GO:0034765(regulation of ion transmembrane transport);GO:0006814(sodium ion transport);GO:0005272(sodium channel activity);GO:0005248(voltage-gated sodium channel activity);GO:0005244(voltage-gated ion channel activity);GO:0006811(ion transport)…	NA	NA	NA	sodium voltage-gated channel alpha subunit 4 [Source:HGNC Symbol;Acc:HGNC:10591]	12.4868	15.1955	0.75422	0.78185	0.846828	11.6171	3.53817	2.98382e-134	3.29986e-131	up	yes
ENSGALG00000032404		ENSGALT00000077391;ENSGALT00000072825;ENSGALT00000077993;ENSGALT00000049382;ENSGALT00000066412;ENSGALT00000076215	NA	04530(Tight junction);04530(Tight junction)	K10352	NA		876.952	1054.57	30.8357	49.1927	42.1338	15.8111	3.98287	2.79707e-133	2.85538e-130	up	yes
ENSGALG00000006190	FHL1	ENSGALT00000009988	GO:0005925(focal adhesion);GO:0005886(plasma membrane);GO:0005829(cytosol);GO:0005737(cytoplasm);GO:0005634(nucleus);GO:2000134(negative regulation of G1/S transition of mitotic cell cycle);GO:1901016(regulation of potassium ion transmembrane transporter activity);GO:0043268(positive regulation of potassium ion transport);GO:0030308(negative regulation of cell growth);GO:0010972(negative regulati…	NA	NA	NA	four and a half LIM domains 1 [Source:HGNC Symbol;Acc:HGNC:3702]	649.659	646.719	85.7516	79.6237	65.1831	5.62277	2.49128	1.83693e-124	1.74128e-121	up	yes
ENSGALG00000028801	YPEL2	ENSGALT00000043623	GO:0046872(metal ion binding)	NA	NA	NA	yippee like 2 [Source:HGNC Symbol;Acc:HGNC:18326]	32.4443	31.89	4.6566	4.81975	4.27224	4.67934	2.22631	4.58076e-123	4.05275e-120	up	yes
ENSGALG00000015128	AQP4	ENSGALT00000036809	GO:0009897(external side of plasma membrane);GO:0005886(plasma membrane);GO:0005737(cytoplasm);GO:0071346(cellular response to interferon-gamma);GO:0050891(multicellular organismal water homeostasis);GO:0015250(water channel activity);GO:0006833(water transport);GO:0016323(basolateral plasma membrane);GO:0034220(ion transmembrane transport);GO:0006810(transport);GO:0005887(integral component of p…	NA	NA	NA	aquaporin-4 isoform 1x [Source:RefSeq peptide;Acc:NP_001304756]	76.1144	68.8555	7.02722	9.32491	8.34459	5.87001	2.55336	8.38017e-109	6.54196e-106	up	yes
ENSGALG00000027703		ENSGALT00000044206;ENSGALT00000045098	GO:0006468(protein phosphorylation);GO:0005524(ATP binding);GO:0004672(protein kinase activity);GO:0004672(protein kinase activity)	NA	NA	NA		40.5967	36.6979	0.925173	1.43146	1.0055	22.9898	4.52292	1.45844e-105	1.07528e-102	up	yes
ENSGALG00000032974	ADAMTS2	ENSGALT00000067480	GO:0030324(lung development);GO:0005578(proteinaceous extracellular matrix);GO:0007283(spermatogenesis);GO:0005615(extracellular space);GO:0030199(collagen fibril organization);GO:0016485(protein processing);GO:0043588(skin development);GO:0008233(peptidase activity)	NA	NA	NA	ADAM metallopeptidase with thrombospondin type 1 motif 2 [Source:HGNC Symbol;Acc:HGNC:218]	88.6958	100.777	14.0409	10.8077	9.94357	5.44583	2.44515	9.87782e-103	6.89939e-100	up	yes
ENSGALG00000039712	DHRS7C	ENSGALT00000081588	NA	NA	NA	NA	dehydrogenase/reductase 7C [Source:HGNC Symbol;Acc:HGNC:32423]	32.2532	40.9045	1.1518	1.45072	1.18626	19.309	4.2712	2.39359e-102	1.58827e-99	up	yes
ENSGALG00000030781	CA2	ENSGALT00000052439;ENSGALT00000088998;ENSGALT00000075441	GO:0008270(zinc ion binding);GO:0005829(cytosol);GO:0005737(cytoplasm);GO:0005886(plasma membrane);GO:0051453(regulation of intracellular pH);GO:0070062(extracellular exosome);GO:0043209(myelin sheath);GO:0004064(arylesterase activity);GO:0004089(carbonate dehydratase activity);GO:0002009(morphogenesis of an epithelium);GO:0015670(carbon dioxide transport);GO:0032230(positive regulation of synapt…	00910(Nitrogen metabolism);00910(Nitrogen metabolism)	K18245	EC:4.2.1.1	Carbonic anhydrase 2 [Source:UniProtKB/Swiss-Prot;Acc:P07630]	25.7873	24.8523	1.07227	1.22631	1.6381	12.8635	3.68521	8.96385e-100	5.66473e-97	up	yes
ENSGALG00000008308	BHLHE40	ENSGALT00000073347;ENSGALT00000013524	GO:0005634(nucleus);GO:0045892(negative regulation of transcription, DNA-templated);GO:0070888(E-box binding);GO:0046982(protein heterodimerization activity);GO:0003677(DNA binding);GO:0019904(protein domain specific binding);GO:0000122(negative regulation of transcription from RNA polymerase II promoter);GO:0042803(protein homodimerization activity);GO:0043425(bHLH transcription factor binding);…	NA	NA	NA	basic helix-loop-helix family member e40 [Source:HGNC Symbol;Acc:HGNC:1046]	27.7192	26.8718	2.90771	3.52902	3.20045	5.66462	2.50198	4.01463e-98	2.42173e-95	up	yes
ENSGALG00000044675	MATN2	ENSGALT00000087239	GO:0001764(neuron migration);GO:0005578(proteinaceous extracellular matrix);GO:0007411(axon guidance);GO:0031012(extracellular matrix);GO:0005615(extracellular space);GO:0005604(basement membrane);GO:0031175(neuron projection development);GO:0008347(glial cell migration);GO:0031104(dendrite regeneration);GO:0048678(response to axon injury)	NA	NA	NA	matrilin 2 [Source:HGNC Symbol;Acc:HGNC:6908]	117.623	118.125	26.4939	23.527	24.6378	3.15769	1.65887	1.87058e-97	1.07933e-94	up	yes
ENSGALG00000002132	KCNIP1	ENSGALT00000074043;ENSGALT00000003332;ENSGALT00000089580	GO:0005509(calcium ion binding);GO:0005737(cytoplasm);GO:0015459(potassium channel regulator activity);GO:1901379(regulation of potassium ion transmembrane transport);GO:0031234(extrinsic component of cytoplasmic side of plasma membrane);GO:0008076(voltage-gated potassium channel complex);GO:0008076(voltage-gated potassium channel complex)	NA	NA	NA	potassium voltage-gated channel interacting protein 1 [Source:HGNC Symbol;Acc:HGNC:15521]	28.3388	36.5076	1.19484	1.32131	1.22284	17.3433	4.1163	2.69963e-97	1.49278e-94	up	yes
ENSGALG00000001021	MYOCD	ENSGALT00000001507	GO:0005634(nucleus);GO:0000790(nuclear chromatin);GO:2001015(negative regulation of skeletal muscle cell differentiation);GO:2000727(positive regulation of cardiac muscle cell differentiation);GO:2000721(positive regulation of transcription from RNA polymerase II promoter involved in smooth muscle cell differentiation);GO:2000587(negative regulation of platelet-derived growth factor receptor-beta…	NA	NA	NA	myocardin [Source:HGNC Symbol;Acc:HGNC:16067]	21.518	18.2491	1.69664	1.66875	1.73088	7.80318	2.96406	2.37695e-96	1.26178e-93	up	yes
ENSGALG00000008805	LMOD2	ENSGALT00000014313	GO:0006936(muscle contraction);GO:0031430(M band);GO:0030017(sarcomere);GO:0030016(myofibril);GO:0005884(actin filament);GO:0045214(sarcomere organization);GO:0045010(actin nucleation);GO:0030041(actin filament polymerization);GO:0030838(positive regulation of actin filament polymerization);GO:0003779(actin binding);GO:0051694(pointed-end actin filament capping);GO:0005523(tropomyosin binding);GO…	NA	NA	NA	leiomodin 2 [Source:HGNC Symbol;Acc:HGNC:6648]	149.532	136.141	11.9902	18.2334	15.9866	6.18204	2.62808	5.13479e-94	2.62091e-91	up	yes
ENSGALG00000008601	AHSG	ENSGALT00000014007	GO:0072562(blood microparticle);GO:0070062(extracellular exosome);GO:0005794(Golgi apparatus);GO:0005615(extracellular space);GO:0070168(negative regulation of biomineral tissue development);GO:0050766(positive regulation of phagocytosis);GO:0050727(regulation of inflammatory response);GO:0030502(negative regulation of bone mineralization);GO:0006953(acute-phase response);GO:0001503(ossification)…	NA	NA	NA	alpha 2-HS glycoprotein [Source:HGNC Symbol;Acc:HGNC:349]	45.3535	63.1762	1.59634	2.68993	1.98938	17.2938	4.11218	6.88247e-94	3.38286e-91	up	yes
ENSGALG00000017075	FRY	ENSGALT00000027578;ENSGALT00000069518;ENSGALT00000062167	GO:1904428(negative regulation of tubulin deacetylation);GO:0004857(enzyme inhibitor activity);GO:0030427(site of polarized growth);GO:0090527(actin filament reorganization);GO:0005938(cell cortex);GO:0000902(cell morphogenesis);GO:0043086(negative regulation of catalytic activity);GO:0031175(neuron projection development);GO:0031175(neuron projection development)	NA	NA	NA	FRY microtubule binding protein [Source:HGNC Symbol;Acc:HGNC:20367]	42.0292	37.7095	4.39791	4.3519	2.80049	6.9036	2.78735	7.8806e-91	3.73512e-88	up	yes
ENSGALG00000009050	CAPN3	ENSGALT00000085581;ENSGALT00000073343;ENSGALT00000032636	GO:0032947(protein complex scaffold activity);GO:0045661(regulation of myoblast differentiation);GO:0071277(cellular response to calcium ion);GO:0045893(positive regulation of transcription, DNA-templated);GO:0045892(negative regulation of transcription, DNA-templated);GO:0008307(structural constituent of muscle);GO:0005509(calcium ion binding);GO:0043066(negative regulation of apoptotic process)…	NA	NA	NA	calpain 3 [Source:HGNC Symbol;Acc:HGNC:1480]	86.5997	89.6913	15.1467	15.9369	11.9399	4.09755	2.03476	4.35186e-90	1.9915e-87	up	yes
ENSGALG00000005226	MYOZ1	ENSGALT00000008397	GO:0015629(actin cytoskeleton);GO:0051373(FATZ binding);GO:0030018(Z disc);GO:0030239(myofibril assembly);GO:0031433(telethonin binding);GO:0003779(actin binding)	NA	NA	NA	myozenin 1 [Source:HGNC Symbol;Acc:HGNC:13752]	352.594	404.05	33.1339	46.3174	50.3096	5.83107	2.54376	5.42105e-87	2.39809e-84	up	yes
ENSGALG00000005974	COL6A1	ENSGALT00000039669;ENSGALT00000081036	GO:0070062(extracellular exosome);GO:0043234(protein complex);GO:0042383(sarcolemma);GO:0031012(extracellular matrix);GO:0016020(membrane);GO:0005765(lysosomal membrane);GO:0005615(extracellular space);GO:0005578(proteinaceous extracellular matrix);GO:0005576(extracellular region);GO:0071230(cellular response to amino acid stimulus);GO:0070208(protein heterotrimerization);GO:0035987(endodermal ce…	04512(ECM-receptor interaction);04510(Focal adhesion);04510(Focal adhesion)	K06238	NA	collagen alpha-1(VI) chain precursor [Source:RefSeq peptide;Acc:NP_990438]	619.178	602.234	151.21	130.934	143.874	2.86705	1.51957	5.92123e-86	2.53486e-83	up	yes
ENSGALG00000006344		ENSGALT00000080710;ENSGALT00000010254;ENSGALT00000049789	GO:0004364(glutathione transferase activity);GO:0005737(cytoplasm);GO:0016740(transferase activity);GO:0006749(glutathione metabolic process);GO:0006749(glutathione metabolic process)	00480(Glutathione metabolism);00980(Metabolism of xenobiotics by cytochrome P450);00982(Drug metabolism - cytochrome P450);00982(Drug metabolism - cytochrome P450)	K00799	EC:2.5.1.18	Glutathione S-transferase theta-1 [Source:UniProtKB/Swiss-Prot;Acc:P20135]	35.6067	40.3153	6.4353	6.13976	6.08815	4.068	2.02432	6.77363e-86	2.80915e-83	up	yes
ENSGALG00000026452	CAVIN4	ENSGALT00000044281	GO:0035023(regulation of Rho protein signal transduction);GO:0005737(cytoplasm);GO:0010468(regulation of gene expression);GO:0045944(positive regulation of transcription from RNA polymerase II promoter);GO:0030018(Z disc);GO:0005886(plasma membrane);GO:0005901(caveola)	NA	NA	NA	caveolae associated protein 4 [Source:HGNC Symbol;Acc:HGNC:33742]	134.368	156.464	19.1325	25.9364	21.5278	4.36707	2.12667	2.43519e-85	9.79317e-83	up	yes
ENSGALG00000039216	COL6A2	ENSGALT00000065376;ENSGALT00000064755	GO:1903561(extracellular vesicle);GO:0070062(extracellular exosome);GO:0043234(protein complex);GO:0042383(sarcolemma);GO:0031012(extracellular matrix);GO:0005615(extracellular space);GO:0005578(proteinaceous extracellular matrix);GO:0005576(extracellular region);GO:0070208(protein heterotrimerization);GO:0005581(collagen trimer);GO:0007155(cell adhesion);GO:0007155(cell adhesion)	04512(ECM-receptor interaction);04510(Focal adhesion);04510(Focal adhesion)	K06238	NA	Collagen alpha-2(VI) chain [Source:UniProtKB/Swiss-Prot;Acc:P15988]	877.531	831.223	211.105	191.032	209.549	2.79351	1.48208	4.67767e-85	1.82581e-82	up	yes
ENSGALG00000003925	MYPN	ENSGALT00000006252	GO:0031674(I band);GO:0030018(Z disc);GO:0045214(sarcomere organization);GO:0051371(muscle alpha-actinin binding);GO:0017124(SH3 domain binding);GO:0008092(cytoskeletal protein binding);GO:0051493(regulation of cytoskeleton organization);GO:0048739(cardiac muscle fiber development);GO:0051015(actin filament binding);GO:0030334(regulation of cell migration)	NA	NA	NA	myopalladin [Source:HGNC Symbol;Acc:HGNC:23246]	67.8125	71.8013	7.92234	11.5498	10.0929	4.72227	2.23948	1.40593e-84	5.3309e-82	up	yes
ENSGALG00000037506	SIPA1L2	ENSGALT00000075800;ENSGALT00000076101	NA	NA	NA	NA	signal induced proliferation associated 1 like 2 [Source:HGNC Symbol;Acc:HGNC:23800]	60.6249	60.7145	12.9995	11.4153	14.4037	3.12582	1.64423	4.83866e-83	1.78372e-80	up	yes
ENSGALG00000003923	COL6A3	ENSGALT00000006250;ENSGALT00000081021	GO:1903561(extracellular vesicle);GO:0070062(extracellular exosome);GO:0042383(sarcolemma);GO:0031012(extracellular matrix);GO:0005615(extracellular space);GO:0005581(collagen trimer);GO:0005578(proteinaceous extracellular matrix);GO:0004867(serine-type endopeptidase inhibitor activity);GO:0010951(negative regulation of endopeptidase activity);GO:0005576(extracellular region);GO:0005576(extracell…	04512(ECM-receptor interaction);04510(Focal adhesion);04510(Focal adhesion)	K06238	NA	collagen type VI alpha 3 chain [Source:HGNC Symbol;Acc:HGNC:2213]	294.07	290.49	53.8415	36.6788	38.131	4.54375	2.18388	7.90075e-83	2.83381e-80	up	yes
ENSGALG00000006027	TM6SF1	ENSGALT00000009702	GO:0005765(lysosomal membrane);GO:0016021(integral component of membrane);GO:0016020(membrane)	NA	NA	NA	transmembrane 6 superfamily member 1 [Source:HGNC Symbol;Acc:HGNC:11860]	44.8162	61.294	6.14458	5.49149	4.87267	6.42752	2.68426	3.8476e-82	1.34373e-79	up	yes
ENSGALG00000002579	RIMBP2	ENSGALT00000067389;ENSGALT00000004065;ENSGALT00000076408	GO:0010923(negative regulation of phosphatase activity);GO:0010923(negative regulation of phosphatase activity)	NA	NA	NA	RIMS binding protein 2 [Source:HGNC Symbol;Acc:HGNC:30339]	112.329	103.13	25.4769	26.9528	26.2478	2.73851	1.45339	1.06832e-81	3.63531e-79	up	yes
ENSGALG00000000498		ENSGALT00000040528	GO:0070062(extracellular exosome);GO:0016021(integral component of membrane);GO:0009897(external side of plasma membrane);GO:0005764(lysosome);GO:0005768(endosome);GO:0060319(primitive erythrocyte differentiation);GO:0050482(arachidonic acid secretion);GO:0060177(regulation of angiotensin metabolic process);GO:0050435(amyloid-beta metabolic process);GO:0043171(peptide catabolic process);GO:004244…	NA	NA	NA		43.2698	48.7647	9.90417	10.7947	10.5301	2.94708	1.55929	5.37184e-81	1.78224e-78	up	yes
ENSGALG00000008335	PHTF2	ENSGALT00000013567	GO:0005783(endoplasmic reticulum);GO:0016021(integral component of membrane);GO:0016020(membrane)	NA	NA	NA	putative homeodomain transcription factor 2 [Source:HGNC Symbol;Acc:HGNC:13411]	59.5864	56.4419	12.6741	14.381	13.8548	2.8362	1.50396	4.68373e-80	1.51604e-77	up	yes
ENSGALG00000026553		ENSGALT00000043595	NA	NA	NA	NA		144.64	144.352	19.933	28.1424	21.8916	4.13039	2.04628	6.07531e-78	1.91965e-75	up	yes
ENSGALG00000028612		ENSGALT00000001424;ENSGALT00000073219;ENSGALT00000079332;ENSGALT00000062590;ENSGALT00000082572	GO:0016459(myosin complex);GO:0003774(motor activity);GO:0051015(actin filament binding);GO:0003779(actin binding);GO:0005524(ATP binding);GO:0000166(nucleotide binding);GO:0000166(nucleotide binding)	04530(Tight junction);04530(Tight junction)	K10352	NA		471.718	468.849	129.657	113.482	115.699	2.62115	1.3902	8.90964e-78	2.74976e-75	up	yes
ENSGALG00000002621	SLC25A42	ENSGALT00000004127	GO:0005739(mitochondrion);GO:0005743(mitochondrial inner membrane);GO:0005634(nucleus);GO:0080121(AMP transport);GO:0035349(coenzyme A transmembrane transport);GO:0015867(ATP transport);GO:0015866(ADP transport);GO:0080122(AMP transmembrane transporter activity);GO:0043262(adenosine-diphosphatase activity);GO:0015228(coenzyme A transmembrane transporter activity);GO:0015217(ADP transmembrane tran…	NA	NA	NA	solute carrier family 25 member 42 [Source:HGNC Symbol;Acc:HGNC:28380]	106.021	118.884	24.6838	24.7354	25.1819	3.01477	1.59205	1.04354e-77	3.14747e-75	up	yes
ENSGALG00000032647	CLASP2	ENSGALT00000067482;ENSGALT00000065195	NA	NA	NA	NA	cytoplasmic linker associated protein 2 [Source:RefSeq peptide;Acc:NP_001170856]	211.014	235.803	59.1891	56.2484	56.6423	2.59657	1.37661	6.17563e-77	1.82126e-74	up	yes
ENSGALG00000023435	GATM	ENSGALT00000038740	GO:0070062(extracellular exosome);GO:0005758(mitochondrial intermembrane space);GO:0005739(mitochondrion);GO:0006601(creatine biosynthetic process);GO:0015068(glycine amidinotransferase activity);GO:0015067(amidinotransferase activity);GO:0006600(creatine metabolic process);GO:0007275(multicellular organism development);GO:0007611(learning or memory);GO:0014889(muscle atrophy)	00260(Glycine, serine and threonine metabolism);00330(Arginine and proline metabolism)	K00613	EC:2.1.4.1	glycine amidinotransferase, mitochondrial [Source:RefSeq peptide;Acc:NP_990076]	1227.05	1212.45	135.472	187.59	117.825	5.53316	2.4681	8.95254e-77	2.58281e-74	up	yes
ENSGALG00000006273	MYLK2	ENSGALT00000010138	GO:0005737(cytoplasm);GO:0005634(nucleus);GO:0055008(cardiac muscle tissue morphogenesis);GO:0046777(protein autophosphorylation);GO:0035914(skeletal muscle cell differentiation);GO:0032971(regulation of muscle filament sliding);GO:0018107(peptidyl-threonine phosphorylation);GO:0014816(skeletal muscle satellite cell differentiation);GO:0010628(positive regulation of gene expression);GO:0007274(ne…	04371(Apelin signaling pathway);04020(Calcium signaling pathway);04510(Focal adhesion);04810(Regulation of actin cytoskeleton);04270(Vascular smooth muscle contraction)	K00907	EC:2.7.11.18	myosin light chain kinase 2 [Source:HGNC Symbol;Acc:HGNC:16243]	7.18772	6.51887	0.288894	0.30454	0.24826	16.2845	4.02543	1.65865e-75	4.68339e-73	up	yes
ENSGALG00000041344	FABP5	ENSGALT00000052937	GO:0070062(extracellular exosome);GO:0015758(glucose transport);GO:0006656(phosphatidylcholine biosynthetic process);GO:0006629(lipid metabolic process);GO:0006006(glucose metabolic process);GO:0006810(transport);GO:0008289(lipid binding)	03320(PPAR signaling pathway)	K08754	NA	fatty acid binding protein 5 [Source:HGNC Symbol;Acc:HGNC:3560]	86.9554	80.2892	16.8594	17.4428	13.7522	3.48031	1.79922	9.7408e-75	2.69313e-72	up	yes
ENSGALG00000016518	PHKA2	ENSGALT00000077755;ENSGALT00000026654	GO:0005977(glycogen metabolic process);GO:0005516(calmodulin binding);GO:0005975(carbohydrate metabolic process);GO:0005964(phosphorylase kinase complex);GO:0004689(phosphorylase kinase activity);GO:0006468(protein phosphorylation);GO:0005886(plasma membrane);GO:0003824(catalytic activity);GO:0016020(membrane);GO:0016020(membrane)	04020(Calcium signaling pathway);04910(Insulin signaling pathway);04910(Insulin signaling pathway)	K07190	NA	phosphorylase kinase regulatory subunit alpha 2 [Source:HGNC Symbol;Acc:HGNC:8926]	40.7024	49.2094	9.6496	8.64183	10.2217	3.15335	1.65689	1.38883e-74	3.76147e-72	up	yes
ENSGALG00000008231	PACSIN3	ENSGALT00000047779;ENSGALT00000047222;ENSGALT00000013396	GO:0097320(plasma membrane tubulation);GO:0030100(regulation of endocytosis);GO:0005768(endosome);GO:0008289(lipid binding);GO:0005737(cytoplasm);GO:0005829(cytosol);GO:0005886(plasma membrane);GO:0070062(extracellular exosome);GO:0051926(negative regulation of calcium ion transport);GO:0008092(cytoskeletal protein binding);GO:0019855(calcium channel inhibitor activity);GO:0045806(negative regula…	NA	NA	NA	protein kinase C and casein kinase substrate in neurons 3 [Source:HGNC Symbol;Acc:HGNC:8572]	193.443	209.427	34.468	41.9621	29.2321	3.8128	1.93085	5.21208e-73	1.35626e-70	up	yes
ENSGALG00000015211	DTNA	ENSGALT00000058454;ENSGALT00000082942;ENSGALT00000024545;ENSGALT00000049758;ENSGALT00000074821;ENSGALT00000052422	GO:0005737(cytoplasm);GO:0046872(metal ion binding);GO:0008270(zinc ion binding);GO:0043234(protein complex);GO:0043234(protein complex)	NA	NA	NA	dystrobrevin alpha [Source:HGNC Symbol;Acc:HGNC:3057]	219.877	201.059	36.1989	47.5916	45.0199	3.26787	1.70835	6.47682e-73	1.65296e-70	up	yes
ENSGALG00000010357	P2RY1	ENSGALT00000016864	GO:0009986(cell surface);GO:0005886(plasma membrane);GO:0090075(relaxation of muscle);GO:0071407(cellular response to organic cyclic compound);GO:0043270(positive regulation of ion transport);GO:0007200(phospholipase C-activating G-protein coupled receptor signaling pathway);GO:0035589(G-protein coupled purinergic nucleotide receptor signaling pathway);GO:0045028(G-protein coupled purinergic nucl…	04080(Neuroactive ligand-receptor interaction)	K04270	NA	purinergic receptor P2Y1 [Source:HGNC Symbol;Acc:HGNC:8539]	78.9489	79.5216	14.007	13.1899	17.7343	3.52696	1.81842	6.73214e-73	1.6857e-70	up	yes
ENSGALG00000034067	FMOD	ENSGALT00000080403	NA	NA	NA	NA	fibromodulin [Source:HGNC Symbol;Acc:HGNC:3774]	69.7138	73.6315	8.59459	11.0993	6.59739	5.45219	2.44684	1.52358e-72	3.74434e-70	up	yes
ENSGALG00000030546	CLEC19A	ENSGALT00000077795	NA	NA	NA	NA	C-type lectin domain containing 19A [Source:HGNC Symbol;Acc:HGNC:34522]	177.967	143.763	6.59306	13.5023	8.40352	11.2892	3.49687	1.50585e-71	3.63349e-69	up	yes
ENSGALG00000035913	PPP1R27	ENSGALT00000064853	NA	NA	NA	NA	protein phosphatase 1 regulatory subunit 27 [Source:HGNC Symbol;Acc:HGNC:16813]	47.0403	44.5044	1.13954	0.487197	0.555851	41.9433	5.39037	6.83345e-71	1.61941e-68	up	yes
ENSGALG00000008266	COL4A6	ENSGALT00000013447	GO:0005604(basement membrane);GO:0005587(collagen type IV trimer);GO:0071230(cellular response to amino acid stimulus);GO:0038063(collagen-activated tyrosine kinase receptor signaling pathway);GO:0030198(extracellular matrix organization);GO:0005198(structural molecule activity);GO:0005581(collagen trimer);GO:0005201(extracellular matrix structural constituent);GO:0005578(proteinaceous extracellu…	04512(ECM-receptor interaction);04510(Focal adhesion);04933(AGE-RAGE signaling pathway in diabetic complications)	K06237	NA	collagen type IV alpha 6 chain [Source:HGNC Symbol;Acc:HGNC:2208]	69.1694	68.3377	15.3155	10.3004	13.7124	3.49639	1.80587	1.14109e-70	2.65674e-68	up	yes
ENSGALG00000012783	MYBPC1	ENSGALT00000054243;ENSGALT00000037619;ENSGALT00000079307;ENSGALT00000064114;ENSGALT00000075879	GO:1903955(positive regulation of protein targeting to mitochondrion);GO:0006936(muscle contraction);GO:0005859(muscle myosin complex);GO:0031430(M band);GO:0071688(striated muscle myosin thick filament assembly);GO:0045214(sarcomere organization);GO:0007015(actin filament organization);GO:0006941(striated muscle contraction);GO:0097493(structural molecule activity conferring elasticity);GO:00513…	NA	NA	NA	myosin binding protein C, slow type [Source:HGNC Symbol;Acc:HGNC:7549]	1252.06	1212.22	158.653	233.531	162.072	4.44609	2.15254	4.22976e-70	9.67812e-68	up	yes
ENSGALG00000007110		ENSGALT00000032362	GO:0016021(integral component of membrane);GO:0016020(membrane)	NA	NA	NA		29.4808	35.0298	2.20564	3.43724	3.19444	7.29979	2.86785	2.77722e-68	6.24686e-66	up	yes
ENSGALG00000016791	SLC9A2	ENSGALT00000027110	GO:0098719(sodium ion import across plasma membrane);GO:0008104(protein localization);GO:0006885(regulation of pH);GO:0006814(sodium ion transport);GO:0015386(potassium:proton antiporter activity);GO:0015385(sodium:proton antiporter activity);GO:0015297(antiporter activity);GO:1902600(hydrogen ion transmembrane transport);GO:0015299(solute:proton antiporter activity);GO:0071805(potassium ion tran…	NA	NA	NA	solute carrier family 9 member A2 [Source:HGNC Symbol;Acc:HGNC:11072]	8.30327	9.31225	0.942378	1.03949	0.918277	6.07401	2.60265	1.77781e-67	3.93223e-65	up	yes
ENSGALG00000004044	CSRP3	ENSGALT00000006436	GO:0030018(Z disc);GO:0060048(cardiac muscle contraction);GO:0055003(cardiac myofibril assembly);GO:0048738(cardiac muscle tissue development);GO:0045944(positive regulation of transcription from RNA polymerase II promoter);GO:0035995(detection of muscle stretch);GO:0033365(protein localization to organelle);GO:0006874(cellular calcium ion homeostasis);GO:0003300(cardiac muscle hypertrophy);GO:00…	NA	NA	NA	cysteine and glycine rich protein 3 [Source:HGNC Symbol;Acc:HGNC:2472]	48.6242	77.8151	6.44452	5.45173	7.34743	6.57043	2.71599	4.63274e-66	9.91629e-64	up	yes
ENSGALG00000008621	NRP2	ENSGALT00000079180;ENSGALT00000075635;ENSGALT00000014048;ENSGALT00000050407	GO:0007411(axon guidance);GO:1990830(cellular response to leukemia inhibitory factor);GO:0007507(heart development);GO:0030424(axon);GO:0003148(outflow tract septum morphogenesis);GO:0017154(semaphorin receptor activity);GO:0001755(neural crest cell migration);GO:0001764(neuron migration);GO:0021612(facial nerve structural organization);GO:0021649(vestibulocochlear nerve structural organization);…	NA	NA	NA	neuropilin 2 [Source:HGNC Symbol;Acc:HGNC:8005]	283.012	304.777	78.5152	86.6847	85.2005	2.34739	1.23106	1.07109e-65	2.25625e-63	up	yes
ENSGALG00000011740	MGP	ENSGALT00000019173	GO:0070062(extracellular exosome);GO:0001503(ossification);GO:0031012(extracellular matrix);GO:0051216(cartilage development);GO:0005201(extracellular matrix structural constituent);GO:0030154(cell differentiation);GO:0007275(multicellular organism development);GO:0005576(extracellular region);GO:0005509(calcium ion binding)	NA	NA	NA	matrix Gla protein [Source:HGNC Symbol;Acc:HGNC:7060]	716.8	567.02	30.6034	57.2497	57.6975	8.82044	3.14085	1.22474e-65	2.53961e-63	up	yes
ENSGALG00000009048	ABLIM1	ENSGALT00000014731	GO:0030027(lamellipodium);GO:0001725(stress fiber);GO:0060271(cilium assembly);GO:0030032(lamellipodium assembly);GO:0007010(cytoskeleton organization);GO:0003779(actin binding);GO:0046872(metal ion binding)	NA	NA	NA	actin-binding LIM protein 1 [Source:RefSeq peptide;Acc:NP_001152835]	63.5824	60.0053	12.8634	14.5333	10.4759	3.26324	1.70631	1.66711e-65	3.40373e-63	up	yes
ENSGALG00000010881	ASB2	ENSGALT00000017687	GO:0031466(Cul5-RING ubiquitin ligase complex);GO:0045445(myoblast differentiation);GO:0042787(protein ubiquitination involved in ubiquitin-dependent protein catabolic process);GO:0035914(skeletal muscle cell differentiation);GO:0000209(protein polyubiquitination);GO:0061630(ubiquitin protein ligase activity);GO:0016567(protein ubiquitination);GO:0035556(intracellular signal transduction);GO:0000…	NA	NA	NA	ankyrin repeat and SOCS box containing 2 [Source:HGNC Symbol;Acc:HGNC:16012]	44.8442	48.818	9.05595	9.06292	11.2244	3.19195	1.67444	1.76743e-65	3.55388e-63	up	yes
ENSGALG00000016768	LONRF2	ENSGALT00000027073	GO:0032436(positive regulation of proteasomal ubiquitin-dependent protein catabolic process);GO:0000209(protein polyubiquitination);GO:0031624(ubiquitin conjugating enzyme binding);GO:0061630(ubiquitin protein ligase activity);GO:0005622(intracellular)	NA	NA	NA	LON peptidase N-terminal domain and ring finger 2 [Source:HGNC Symbol;Acc:HGNC:24788]	103.392	92.7008	27.1797	29.097	28.1012	2.32398	1.2166	2.55002e-65	5.05094e-63	up	yes
ENSGALG00000006544		ENSGALT00000010572	GO:0000245(spliceosomal complex assembly);GO:0050684(regulation of mRNA processing);GO:0004674(protein serine/threonine kinase activity);GO:0035556(intracellular signal transduction);GO:0005634(nucleus);GO:0005737(cytoplasm);GO:0006468(protein phosphorylation);GO:0005524(ATP binding);GO:0004672(protein kinase activity)	NA	NA	NA		48.9749	55.4476	12.0798	11.6858	10.6261	3.03626	1.6023	5.4651e-65	1.06658e-62	up	yes
ENSGALG00000036786		ENSGALT00000082310	NA	NA	NA	NA		43.7684	60.1979	4.22734	6.86636	5.39695	6.30456	2.6564	5.6812e-65	1.09268e-62	up	yes
ENSGALG00000008204	FEM1C	ENSGALT00000013361	GO:0005829(cytosol);GO:0005654(nucleoplasm)	NA	NA	NA	fem-1 homolog C [Source:HGNC Symbol;Acc:HGNC:16933]	51.3892	51.5325	14.5796	12.6844	12.6509	2.57852	1.36655	1.5726e-64	2.98142e-62	up	yes
ENSGALG00000005550	ST6GAL1	ENSGALT00000008903;ENSGALT00000065456	GO:0097503(sialylation);GO:0070062(extracellular exosome);GO:0018279(protein N-linked glycosylation via asparagine);GO:0006486(protein glycosylation);GO:0006054(N-acetylneuraminate metabolic process);GO:0008373(sialyltransferase activity);GO:0003835(beta-galactoside alpha-2,6-sialyltransferase activity);GO:0005794(Golgi apparatus);GO:0016757(transferase activity, transferring glycosyl groups);GO:…	00510(N-Glycan biosynthesis);00514(Other types of O-glycan biosynthesis);00514(Other types of O-glycan biosynthesis)	K00778	EC:2.4.99.1	ST6 beta-galactoside alpha-2,6-sialyltransferase 1 [Source:HGNC Symbol;Acc:HGNC:10860]	24.8311	28.6674	5.02486	4.66747	4.01626	3.90255	1.96442	2.8705e-64	5.36541e-62	up	yes
ENSGALG00000009315	PAPLN	ENSGALT00000082223;ENSGALT00000015156;ENSGALT00000061377	GO:0008233(peptidase activity);GO:0004867(serine-type endopeptidase inhibitor activity);GO:0004222(metalloendopeptidase activity);GO:0006508(proteolysis);GO:0010951(negative regulation of endopeptidase activity);GO:0008270(zinc ion binding);GO:0008270(zinc ion binding)	NA	NA	NA	papilin, proteoglycan like sulfated glycoprotein [Source:HGNC Symbol;Acc:HGNC:19262]	35.7559	28.7757	4.66555	5.94518	6.6126	3.74675	1.90564	7.3543e-64	1.35554e-61	up	yes
ENSGALG00000030871	NR13	ENSGALT00000082198	GO:2001243(negative regulation of intrinsic apoptotic signaling pathway);GO:0008630(intrinsic apoptotic signaling pathway in response to DNA damage);GO:0042803(protein homodimerization activity);GO:0005741(mitochondrial outer membrane);GO:0006915(apoptotic process);GO:0042981(regulation of apoptotic process);GO:0005886(plasma membrane);GO:0016021(integral component of membrane);GO:0016020(membran…	NA	NA	NA	Anti-apoptotic protein NR13 [Source:UniProtKB/Swiss-Prot;Acc:Q90ZN1]	95.5543	111.257	14.2082	16.7583	13.2175	4.68068	2.22672	1.2264e-63	2.22953e-61	up	yes
ENSGALG00000009537	PPM1L	ENSGALT00000015523	GO:0070062(extracellular exosome);GO:0007178(transmembrane receptor protein serine/threonine kinase signaling pathway);GO:0000165(MAPK cascade);GO:0043169(cation binding);GO:0004722(protein serine/threonine phosphatase activity);GO:0004721(phosphoprotein phosphatase activity);GO:0016787(hydrolase activity);GO:0005622(intracellular);GO:0046872(metal ion binding);GO:0003824(catalytic activity);GO:0…	NA	NA	NA	protein phosphatase, Mg2+/Mn2+ dependent 1L [Source:HGNC Symbol;Acc:HGNC:16381]	70.1271	62.24	11.702	13.0098	14.2549	3.39693	1.76423	2.01771e-63	3.61852e-61	up	yes
ENSGALG00000038311	COL18A1	ENSGALT00000077208	GO:0070062(extracellular exosome);GO:0031012(extracellular matrix);GO:0005615(extracellular space);GO:0001525(angiogenesis);GO:0005604(basement membrane);GO:0008284(positive regulation of cell proliferation);GO:0030198(extracellular matrix organization);GO:0005576(extracellular region);GO:0030335(positive regulation of cell migration);GO:0001886(endothelial cell morphogenesis);GO:2000353(positive…	NA	NA	NA	collagen type XVIII alpha 1 chain [Source:HGNC Symbol;Acc:HGNC:2195]	94.7622	94.6384	26.759	29.7757	27.0535	2.26588	1.18007	3.39058e-63	5.92057e-61	up	yes
ENSGALG00000030879	AR	ENSGALT00000073367	NA	04114(Oocyte meiosis)	K08557	NA	androgen receptor [Source:HGNC Symbol;Acc:HGNC:644]	46.0542	46.6016	11.9602	13.7807	11.2636	2.50391	1.32418	4.33782e-63	7.47626e-61	up	yes
ENSGALG00000037869		ENSGALT00000052260;ENSGALT00000066380	NA	NA	NA	NA		26.3984	26.4673	7.29202	6.24947	6.37878	2.65386	1.40809	6.0907e-62	1.03628e-59	up	yes
ENSGALG00000012906	CDH20	ENSGALT00000021043;ENSGALT00000048550	GO:0007155(cell adhesion);GO:0005886(plasma membrane);GO:0007156(homophilic cell adhesion via plasma membrane adhesion molecules);GO:0046872(metal ion binding);GO:0005509(calcium ion binding);GO:0016021(integral component of membrane);GO:0016020(membrane);GO:0016020(membrane)	NA	NA	NA	Cadherin-20 [Source:UniProtKB/Swiss-Prot;Acc:Q8QGH3]	19.602	23.3332	4.6729	4.77405	4.57466	3.06208	1.61451	8.73016e-62	1.46656e-59	up	yes
ENSGALG00000012377	HNMT	ENSGALT00000020209;ENSGALT00000057796;ENSGALT00000057311	GO:0032259(methylation);GO:0007420(brain development);GO:0046539(histamine N-methyltransferase activity);GO:0008170(N-methyltransferase activity);GO:0043005(neuron projection);GO:0005737(cytoplasm);GO:0070062(extracellular exosome);GO:0001695(histamine catabolic process);GO:1903955(positive regulation of protein targeting to mitochondrion);GO:1903955(positive regulation of protein targeting to mi…	00340(Histidine metabolism);00340(Histidine metabolism)	K00546	EC:2.1.1.8	histamine N-methyltransferase [Source:HGNC Symbol;Acc:HGNC:5028]	26.7251	19.1744	2.50576	3.53929	3.07402	5.03335	2.33152	9.17746e-62	1.52243e-59	up	yes
ENSGALG00000006775	TGM2	ENSGALT00000039224	GO:0070062(extracellular exosome);GO:0031226(intrinsic component of plasma membrane);GO:0031012(extracellular matrix);GO:0005925(focal adhesion);GO:0005829(cytosol);GO:0005783(endoplasmic reticulum);GO:0005739(mitochondrion);GO:0060662(salivary gland cavitation);GO:0060445(branching involved in salivary gland morphogenesis);GO:0051561(positive regulation of mitochondrial calcium ion concentration…	NA	NA	NA	protein-glutamine gamma-glutamyltransferase 2 [Source:RefSeq peptide;Acc:NP_990779]	42.0171	39.5573	12.1508	10.1517	11.1842	2.43602	1.28453	5.4977e-61	9.0074e-59	up	yes
ENSGALG00000011541	BIN1	ENSGALT00000018820	GO:0060987(lipid tube);GO:0030424(axon);GO:0016020(membrane);GO:0005829(cytosol);GO:0005737(cytoplasm);GO:0005635(nuclear envelope);GO:0071156(regulation of cell cycle arrest);GO:0005634(nucleus);GO:0060988(lipid tube assembly);GO:0051647(nucleus localization);GO:0048711(positive regulation of astrocyte differentiation);GO:0045664(regulation of neuron differentiation);GO:0043065(positive regulati…	04144(Endocytosis)	K12562	NA	bridging integrator 1 [Source:HGNC Symbol;Acc:HGNC:1052]	757.32	724.376	231.574	240.307	215.131	2.15672	1.10884	1.71667e-60	2.77828e-58	up	yes
ENSGALG00000006562	MCF2	ENSGALT00000010594;ENSGALT00000082697	GO:0070062(extracellular exosome);GO:0005085(guanyl-nucleotide exchange factor activity);GO:0035023(regulation of Rho protein signal transduction);GO:0005089(Rho guanyl-nucleotide exchange factor activity);GO:0005622(intracellular);GO:0035556(intracellular signal transduction);GO:0065009(regulation of molecular function);GO:0065009(regulation of molecular function)	NA	NA	NA	MCF.2 cell line derived transforming sequence [Source:HGNC Symbol;Acc:HGNC:6940]	49.5888	53.3417	16.2128	16.223	15.7275	2.13712	1.09567	3.75153e-60	5.99838e-58	up	yes
ENSGALG00000006647	DUSP8	ENSGALT00000010751	GO:0016311(dephosphorylation);GO:0000188(inactivation of MAPK activity);GO:0017017(MAP kinase tyrosine/serine/threonine phosphatase activity);GO:0016791(phosphatase activity);GO:0035335(peptidyl-tyrosine dephosphorylation);GO:0006470(protein dephosphorylation);GO:0008138(protein tyrosine/serine/threonine phosphatase activity);GO:0004725(protein tyrosine phosphatase activity)	04010(MAPK signaling pathway)	K04459	EC:3.1.3.16;EC:3.1.3.48	dual specificity phosphatase 8 [Source:HGNC Symbol;Acc:HGNC:3074]	56.587	48.3513	12.3517	13.2831	14.0509	2.64423	1.40285	6.33181e-60	1.00035e-57	up	yes
ENSGALG00000003800	PABPC4	ENSGALT00000006028	GO:0030529(intracellular ribonucleoprotein complex);GO:0010494(cytoplasmic stress granule);GO:0005829(cytosol);GO:0005737(cytoplasm);GO:0005634(nucleus);GO:0008266(poly(U) RNA binding);GO:0008143(poly(A) binding);GO:0003723(RNA binding);GO:0003676(nucleic acid binding);GO:0003729(mRNA binding);GO:0043488(regulation of mRNA stability);GO:0061515(myeloid cell development)	03013(RNA transport);03015(mRNA surveillance pathway);03018(RNA degradation)	K13126	NA	poly(A) binding protein cytoplasmic 4 [Source:HGNC Symbol;Acc:HGNC:8557]	73.8435	88.0105	21.7043	23.1674	20.9162	2.46024	1.2988	3.19437e-59	4.98736e-57	up	yes
ENSGALG00000018700	PLPP7	ENSGALT00000006004	GO:0005635(nuclear envelope);GO:0010832(negative regulation of myotube differentiation);GO:0016021(integral component of membrane);GO:0016020(membrane)	NA	NA	NA	phospholipid phosphatase 7 (inactive) [Source:HGNC Symbol;Acc:HGNC:28174]	21.5671	21.7048	2.42279	1.82005	1.69324	7.28962	2.86584	4.02426e-59	6.21e-57	up	yes
ENSGALG00000009082	COQ8A	ENSGALT00000014777	GO:0005739(mitochondrion);GO:0016310(phosphorylation);GO:0006744(ubiquinone biosynthetic process);GO:0043531(ADP binding);GO:0016301(kinase activity)	NA	NA	NA	coenzyme Q8A [Source:HGNC Symbol;Acc:HGNC:16812]	139.767	126.237	39.4073	41.4543	43.7142	2.13528	1.09443	5.29111e-59	8.07108e-57	up	yes
ENSGALG00000039696		ENSGALT00000086529;ENSGALT00000059084	NA	00230(Purine metabolism);00230(Purine metabolism)	K01509	EC:3.6.1.3		106.808	76.6797	21.3501	22.5656	21.2254	2.81677	1.49404	8.98325e-59	1.35474e-56	up	yes
ENSGALG00000006964		ENSGALT00000011282	GO:0003854(3-beta-hydroxy-delta5-steroid dehydrogenase activity);GO:0006694(steroid biosynthetic process);GO:0016616(oxidoreductase activity, acting on the CH-OH group of donors, NAD or NADP as acceptor);GO:0055114(oxidation-reduction process);GO:0016021(integral component of membrane);GO:0016020(membrane)	NA	NA	NA		41.7518	35.0747	6.05265	8.10043	6.481	3.72328	1.89657	1.57749e-58	2.35223e-56	up	yes
ENSGALG00000032550		ENSGALT00000056869;ENSGALT00000078008;ENSGALT00000052965;ENSGALT00000070142	NA	NA	NA	NA		1682.01	1878.04	503.253	575.879	509.539	2.2409	1.16408	1.81081e-57	2.67014e-55	up	yes
ENSGALG00000040275	RCSD1	ENSGALT00000072593;ENSGALT00000068899	GO:0071474(cellular hyperosmotic response);GO:0051015(actin filament binding);GO:0051015(actin filament binding)	NA	NA	NA	RCSD domain containing 1 [Source:HGNC Symbol;Acc:HGNC:28310]	53.8745	51.7992	14.6869	17.0373	14.3767	2.29223	1.19675	1.9986e-57	2.91466e-55	up	yes
ENSGALG00000017168	SLN	ENSGALT00000027729	GO:0033017(sarcoplasmic reticulum membrane);GO:0016529(sarcoplasmic reticulum);GO:1901894(regulation of calcium-transporting ATPase activity);GO:1901077(regulation of relaxation of muscle);GO:0070296(sarcoplasmic reticulum calcium ion transport);GO:0030234(enzyme regulator activity);GO:0016021(integral component of membrane);GO:0016020(membrane)	NA	NA	NA	sarcolipin [Source:HGNC Symbol;Acc:HGNC:11089]	174.882	147.685	0.233471	1.94009	1.28285	93.3243	6.54418	2.20427e-56	3.14546e-54	up	yes
ENSGALG00000017208	AMOTL1	ENSGALT00000027816;ENSGALT00000069747;ENSGALT00000054573	GO:0008180(COP9 signalosome);GO:0016324(apical plasma membrane);GO:0031410(cytoplasmic vesicle);GO:0042802(identical protein binding);GO:0035329(hippo signaling);GO:0005923(bicellular tight junction);GO:0030027(lamellipodium);GO:0003365(establishment of cell polarity involved in ameboidal cell migration);GO:0043536(positive regulation of blood vessel endothelial cell migration);GO:0043536(positiv…	04530(Tight junction);04530(Tight junction)	K06104	NA	angiomotin like 1 [Source:HGNC Symbol;Acc:HGNC:17811]	41.5598	38.8672	11.6962	11.1361	12.9045	2.25053	1.17027	5.48461e-56	7.74322e-54	up	yes
ENSGALG00000003816	NT5C1A	ENSGALT00000006051	GO:0009128(purine nucleoside monophosphate catabolic process);GO:0016311(dephosphorylation);GO:0008253(5'-nucleotidase activity);GO:0009117(nucleotide metabolic process);GO:0000287(magnesium ion binding);GO:0000166(nucleotide binding);GO:0005737(cytoplasm)	00230(Purine metabolism);00240(Pyrimidine metabolism);00760(Nicotinate and nicotinamide metabolism)	K01081	EC:3.1.3.5	5'-nucleotidase, cytosolic IA [Source:HGNC Symbol;Acc:HGNC:17819]	28.7553	36.577	4.25991	2.4031	2.77344	6.92339	2.79148	1.53196e-55	2.14007e-53	up	yes
ENSGALG00000009219	C1ORF95	ENSGALT00000015006	GO:0016021(integral component of membrane);GO:0016020(membrane)	NA	NA	NA	Gallus gallus chromosome 3 open reading frame, human C1orf95 (C1ORF95), mRNA. [Source:RefSeq mRNA;Acc:NM_001277538]	59.7725	61.9532	8.4291	6.6932	7.80918	5.30824	2.40823	2.26803e-55	3.13531e-53	up	yes
ENSGALG00000006260	KLHL30	ENSGALT00000049957;ENSGALT00000010118;ENSGALT00000053139	GO:0031463(Cul3-RING ubiquitin ligase complex);GO:0004842(ubiquitin-protein transferase activity);GO:0016567(protein ubiquitination);GO:0016567(protein ubiquitination)	NA	NA	NA	kelch like family member 30 [Source:HGNC Symbol;Acc:HGNC:24770]	55.528	61.2651	15.9274	11.1602	11.8295	3.00107	1.58548	8.04185e-55	1.08901e-52	up	yes
ENSGALG00000009700	PDK4	ENSGALT00000015790	GO:0005743(mitochondrial inner membrane);GO:0005739(mitochondrion);GO:2000811(negative regulation of anoikis);GO:0072593(reactive oxygen species metabolic process);GO:0071398(cellular response to fatty acid);GO:0046320(regulation of fatty acid oxidation);GO:0045124(regulation of bone resorption);GO:0042594(response to starvation);GO:0042593(glucose homeostasis);GO:0042304(regulation of fatty acid…	NA	NA	NA	pyruvate dehydrogenase kinase 4 [Source:HGNC Symbol;Acc:HGNC:8812]	352.986	319.787	6.15625	17.6943	9.17456	20.3715	4.34848	1.40177e-54	1.87908e-52	up	yes
ENSGALG00000005065	PLA2G4A	ENSGALT00000079041;ENSGALT00000008121;ENSGALT00000080297;ENSGALT00000059534;ENSGALT00000048470	GO:0005829(cytosol);GO:0005811(lipid droplet);GO:0005794(Golgi apparatus);GO:0005783(endoplasmic reticulum);GO:0071236(cellular response to antibiotic);GO:0050482(arachidonic acid secretion);GO:0046456(icosanoid biosynthetic process);GO:0042127(regulation of cell proliferation);GO:0005544(calcium-dependent phospholipid binding);GO:0005509(calcium ion binding);GO:0004623(phospholipase A2 activity)…	00564(Glycerophospholipid metabolism);00565(Ether lipid metabolism);00590(Arachidonic acid metabolism);00591(Linoleic acid metabolism);00592(alpha-Linolenic acid metabolism);04010(MAPK signaling pathway);04370(VEGF signaling pathway);04217(Necroptosis);04912(GnRH signaling pathway);04270(Vascular smooth muscle contraction);04270(Vascular smooth muscle contraction)	K16342	EC:3.1.1.4	phospholipase A2 group IVA [Source:HGNC Symbol;Acc:HGNC:9035]	31.3536	33.2739	9.80101	9.14494	8.27742	2.37397	1.2473	1.62932e-54	2.16227e-52	up	yes
ENSGALG00000002198	FHOD1	ENSGALT00000003437	GO:0016020(membrane);GO:0014704(intercalated disc);GO:0005634(nucleus);GO:0005829(cytosol);GO:0001725(stress fiber);GO:0051660(establishment of centrosome localization);GO:0051496(positive regulation of stress fiber assembly);GO:0045944(positive regulation of transcription from RNA polymerase II promoter);GO:0007097(nuclear migration);GO:0042802(identical protein binding);GO:0051492(regulation of…	NA	NA	NA	formin homology 2 domain containing 1 [Source:HGNC Symbol;Acc:HGNC:17905]	15.2106	16.711	2.76916	3.57248	2.68317	3.5371	1.82257	3.84573e-54	5.05313e-52	up	yes
ENSGALG00000008536	KLHDC3	ENSGALT00000013911;ENSGALT00000052918	GO:0005737(cytoplasm);GO:0000790(nuclear chromatin);GO:0003682(chromatin binding);GO:0003682(chromatin binding)	NA	NA	NA	kelch domain containing 3 [Source:HGNC Symbol;Acc:HGNC:20704]	57.6222	69.0396	16.9918	14.1191	11.9709	2.94003	1.55583	5.82246e-54	7.57547e-52	up	yes
ENSGALG00000009089		ENSGALT00000014791	GO:0005859(muscle myosin complex);GO:0031430(M band);GO:0071688(striated muscle myosin thick filament assembly);GO:0045214(sarcomere organization);GO:0007015(actin filament organization);GO:0006941(striated muscle contraction);GO:0097493(structural molecule activity conferring elasticity);GO:0051371(muscle alpha-actinin binding);GO:0008307(structural constituent of muscle);GO:0030018(Z disc);GO:0…	NA	NA	NA		2035.86	2263.51	606.35	717.607	663.663	2.16307	1.11308	9.75708e-54	1.25715e-51	up	yes
ENSGALG00000012847		ENSGALT00000020949	GO:0015179(L-amino acid transmembrane transporter activity);GO:0015297(antiporter activity);GO:0005887(integral component of plasma membrane);GO:1902475(L-alpha-amino acid transmembrane transport);GO:0003333(amino acid transmembrane transport);GO:0015171(amino acid transmembrane transporter activity);GO:0016021(integral component of membrane);GO:0016020(membrane)	04216(Ferroptosis)	K13869	NA		82.5436	79.6931	7.88266	10.5939	4.87574	6.94736	2.79647	1.40134e-53	1.78818e-51	up	yes
ENSGALG00000015630	EDIL3	ENSGALT00000025199;ENSGALT00000068334;ENSGALT00000059618	GO:1903561(extracellular vesicle);GO:0070062(extracellular exosome);GO:0031012(extracellular matrix);GO:0010811(positive regulation of cell-substrate adhesion);GO:0005178(integrin binding);GO:0005509(calcium ion binding);GO:0005509(calcium ion binding)	NA	NA	NA	EGF like repeats and discoidin domains 3 [Source:HGNC Symbol;Acc:HGNC:3173]	22.7917	28.6981	4.37829	3.65375	3.37605	4.51345	2.17423	3.54004e-53	4.47428e-51	up	yes
ENSGALG00000005207	SYNPO2L	ENSGALT00000060767	GO:0005829(cytosol);GO:0005634(nucleus);GO:0016607(nuclear speck)	NA	NA	NA	synaptopodin 2 like [Source:HGNC Symbol;Acc:HGNC:23532]	132.833	145.013	43.4668	45.9441	37.0131	2.19773	1.13602	2.28419e-52	2.85976e-50	up	yes
ENSGALG00000001977		ENSGALT00000054821	NA	NA	NA	NA		285.393	303.992	52.0307	77.8839	68.0716	2.9769	1.57381	3.13734e-52	3.89118e-50	up	yes
ENSGALG00000011016	PGM1	ENSGALT00000085277;ENSGALT00000079880;ENSGALT00000017947	GO:0006006(glucose metabolic process);GO:0019388(galactose catabolic process);GO:0005978(glycogen biosynthetic process);GO:0004614(phosphoglucomutase activity);GO:0071704(organic substance metabolic process);GO:0016868(intramolecular transferase activity, phosphotransferases);GO:0000287(magnesium ion binding);GO:0005829(cytosol);GO:0005975(carbohydrate metabolic process);GO:0046872(metal ion bind…	00010(Glycolysis / Gluconeogenesis);00030(Pentose phosphate pathway);00052(Galactose metabolism);00500(Starch and sucrose metabolism);00520(Amino sugar and nucleotide sugar metabolism);00230(Purine metabolism);00230(Purine metabolism)	K01835	EC:5.4.2.2	phosphoglucomutase 1 [Source:HGNC Symbol;Acc:HGNC:8905]	65.5366	67.9923	22.8672	22.6088	19.4669	2.0561	1.03991	4.20483e-52	5.16688e-50	up	yes
ENSGALG00000006591	TNNI2	ENSGALT00000010641	GO:0005861(troponin complex);GO:0005634(nucleus);GO:0045893(positive regulation of transcription, DNA-templated);GO:0003009(skeletal muscle contraction);GO:0031014(troponin T binding);GO:0003779(actin binding)	NA	NA	NA	Gallus gallus troponin I type 2 (skeletal, fast) (TNNI2), mRNA. [Source:RefSeq mRNA;Acc:NM_205417]	1864.11	2218.33	378.438	547.274	429.794	3.01175	1.5906	5.02933e-52	6.12332e-50	up	yes
ENSGALG00000006802	LAMB2	ENSGALT00000049720;ENSGALT00000036239;ENSGALT00000057354;ENSGALT00000066971;ENSGALT00000073388;ENSGALT00000055283	GO:0005604(basement membrane);GO:0070062(extracellular exosome);GO:0007601(visual perception);GO:0007411(axon guidance);GO:0031012(extracellular matrix);GO:0005615(extracellular space);GO:0007528(neuromuscular junction development);GO:0045202(synapse);GO:0060041(retina development in camera-type eye);GO:0050808(synapse organization);GO:0031175(neuron projection development);GO:0014044(Schwann cel…	04512(ECM-receptor interaction);04510(Focal adhesion);04510(Focal adhesion)	K06243	NA	laminin subunit beta 2 [Source:HGNC Symbol;Acc:HGNC:6487]	35.2451	40.0867	12.2934	12.1153	10.1709	2.17851	1.12334	5.38326e-52	6.49466e-50	up	yes
ENSGALG00000004103	FAM81A	ENSGALT00000006527	NA	NA	NA	NA	family with sequence similarity 81 member A [Source:HGNC Symbol;Acc:HGNC:28379]	16.1873	13.9094	0.399053	0.223989	0.601369	24.5806	4.61945	7.87812e-52	9.41896e-50	up	yes
ENSGALG00000034107	TRIM63	ENSGALT00000072202;ENSGALT00000088589	NA	NA	NA	NA	tripartite motif containing 63 [Source:HGNC Symbol;Acc:HGNC:16007]	35.0073	40.3887	7.43135	8.97307	8.34248	3.04668	1.60724	9.40657e-52	1.11459e-49	up	yes
ENSGALG00000041808	ANO1	ENSGALT00000064540	GO:1902476(chloride transmembrane transport);GO:0005254(chloride channel activity);GO:0006821(chloride transport);GO:0005886(plasma membrane);GO:0070062(extracellular exosome);GO:0005227(calcium activated cation channel activity);GO:0005229(intracellular calcium activated chloride channel activity);GO:0006812(cation transport);GO:0015111(iodide transmembrane transporter activity);GO:0015705(iodid…	NA	NA	NA	anoctamin 1 [Source:HGNC Symbol;Acc:HGNC:21625]	22.4767	18.2777	1.46081	0.766957	0.506704	14.9039	3.89762	1.44131e-51	1.67787e-49	up	yes
ENSGALG00000003886	SGCD	ENSGALT00000006182	GO:0042383(sarcolemma);GO:0016012(sarcoglycan complex);GO:0016011(dystroglycan complex);GO:0016010(dystrophin-associated glycoprotein complex);GO:0061024(membrane organization);GO:0060047(heart contraction);GO:0055001(muscle cell development);GO:0048738(cardiac muscle tissue development);GO:0007517(muscle organ development);GO:0016021(integral component of membrane);GO:0016020(membrane)	NA	NA	NA	sarcoglycan delta [Source:HGNC Symbol;Acc:HGNC:10807]	91.5016	92.4684	23.6395	25.2524	28.2988	2.38332	1.25297	6.35032e-51	7.2651e-49	up	yes
ENSGALG00000005554	ADIPOQ	ENSGALT00000008913	GO:0070062(extracellular exosome);GO:0009986(cell surface);GO:0005783(endoplasmic reticulum);GO:0005615(extracellular space);GO:2000590(negative regulation of metanephric mesenchymal cell migration);GO:2000584(negative regulation of platelet-derived growth factor receptor-alpha signaling pathway);GO:2000534(positive regulation of renal albumin absorption);GO:2000481(positive regulation of cAMP-de…	04920(Adipocytokine signaling pathway);03320(PPAR signaling pathway)	K07296	NA	adiponectin, C1Q and collagen domain containing [Source:HGNC Symbol;Acc:HGNC:13633]	30.0594	22.2187	3.00542	1.55772	2.22946	7.69633	2.94417	7.18484e-51	8.14957e-49	up	yes
ENSGALG00000019622	TRIM71	ENSGALT00000031151	GO:0005622(intracellular);GO:0046872(metal ion binding);GO:0008270(zinc ion binding);GO:0004842(ubiquitin-protein transferase activity);GO:0030371(translation repressor activity);GO:0035198(miRNA binding);GO:0061630(ubiquitin protein ligase activity);GO:0000082(G1/S transition of mitotic cell cycle);GO:0001843(neural tube closure);GO:0008543(fibroblast growth factor receptor signaling pathway);GO…	NA	NA	NA	tripartite motif containing 71 [Source:HGNC Symbol;Acc:HGNC:32669]	17.5858	16.8802	3.72476	3.91003	3.22195	3.17462	1.66658	1.40254e-50	1.57739e-48	up	yes
ENSGALG00000002845	CTNNA3	ENSGALT00000004486	GO:0030027(lamellipodium);GO:0005916(fascia adherens);GO:0005912(adherens junction);GO:0098911(regulation of ventricular cardiac muscle cell action potential);GO:0086091(regulation of heart rate by cardiac conduction);GO:0086073(bundle of His cell-Purkinje myocyte adhesion involved in cell communication);GO:0008013(beta-catenin binding);GO:0045296(cadherin binding);GO:0051015(actin filament bindi…	04520(Adherens junction)	K05691	NA	catenin alpha 3 [Source:HGNC Symbol;Acc:HGNC:2511]	9.62206	14.384	1.69575	1.47292	1.90713	4.72951	2.24169	2.03245e-50	2.26661e-48	up	yes
ENSGALG00000012155	EGF	ENSGALT00000019851;ENSGALT00000076720	GO:0017147(Wnt-protein binding);GO:0060059(embryonic retina morphogenesis in camera-type eye);GO:0044332(Wnt signaling pathway involved in dorsal/ventral axis specification);GO:0042813(Wnt-activated receptor activity);GO:0043235(receptor complex);GO:0060070(canonical Wnt signaling pathway);GO:0005886(plasma membrane);GO:0008083(growth factor activity);GO:0005509(calcium ion binding);GO:0016021(in…	04010(MAPK signaling pathway);04012(ErbB signaling pathway);04068(FoxO signaling pathway);04060(Cytokine-cytokine receptor interaction);04510(Focal adhesion);04540(Gap junction);04810(Regulation of actin cytoskeleton);04810(Regulation of actin cytoskeleton)	K04357	NA	epidermal growth factor [Source:HGNC Symbol;Acc:HGNC:3229]	16.9746	21.6787	0.949649	2.11505	1.35739	8.74097	3.12779	2.3477e-50	2.59637e-48	up	yes
ENSGALG00000007114	APOA1	ENSGALT00000089703;ENSGALT00000084883;ENSGALT00000011524;ENSGALT00000052540;ENSGALT00000078121;ENSGALT00000084694;ENSGALT00000090218	GO:0070653(high-density lipoprotein particle receptor binding);GO:0034364(high-density lipoprotein particle);GO:0051726(regulation of cell cycle);GO:0005515(protein binding);GO:0072562(blood microparticle);GO:0042627(chylomicron);GO:0070328(triglyceride homeostasis);GO:0051006(positive regulation of lipoprotein lipase activity);GO:0046470(phosphatidylcholine metabolic process);GO:0045723(positive…	03320(PPAR signaling pathway);03320(PPAR signaling pathway)	K08757	NA	apolipoprotein A1 [Source:HGNC Symbol;Acc:HGNC:600]	50.6971	24.9623	2.84064	3.35878	3.15562	8.08754	3.0157	2.80717e-50	3.0536e-48	up	yes
ENSGALG00000042679	RETREG1	ENSGALT00000082493	GO:0005801(cis-Golgi network);GO:0019233(sensory perception of pain);GO:0043524(negative regulation of neuron apoptotic process);GO:0061709(reticulophagy);GO:0030176(integral component of endoplasmic reticulum membrane);GO:0016604(nuclear body);GO:0005783(endoplasmic reticulum)	NA	NA	NA	reticulophagy regulator 1 [Source:HGNC Symbol;Acc:HGNC:25964]	35.3091	29.7462	6.85751	5.23154	5.06338	3.79278	1.92325	4.52113e-50	4.87804e-48	up	yes
ENSGALG00000010870	JUN	ENSGALT00000038039	GO:0005719(nuclear euchromatin);GO:0017053(transcriptional repressor complex);GO:0005667(transcription factor complex);GO:0005654(nucleoplasm);GO:0005634(nucleus);GO:2000144(positive regulation of DNA-templated transcription, initiation);GO:1990441(negative regulation of transcription from RNA polymerase II promoter in response to endoplasmic reticulum stress);GO:1902895(positive regulation of pr…	04010(MAPK signaling pathway);04012(ErbB signaling pathway);04310(Wnt signaling pathway);04137(Mitophagy - animal);04210(Apoptosis);04510(Focal adhesion);04530(Tight junction);04620(Toll-like receptor signaling pathway);04621(NOD-like receptor signaling pathway);04912(GnRH signaling pathway);04933(AGE-RAGE signaling pathway in diabetic complications);05132(Salmonella infection);05164(Influenza A)…	K04448	NA	Jun proto-oncogene, AP-1 transcription factor subunit [Source:HGNC Symbol;Acc:HGNC:6204]	63.5138	52.9539	14.3766	12.9854	17.2426	2.61111	1.38466	5.03742e-50	5.39126e-48	up	yes
ENSGALG00000001633	DUSP26	ENSGALT00000002495	GO:0070062(extracellular exosome);GO:0005794(Golgi apparatus);GO:0005739(mitochondrion);GO:0005737(cytoplasm);GO:0005634(nucleus);GO:1902310(positive regulation of peptidyl-serine dephosphorylation);GO:0070373(negative regulation of ERK1 and ERK2 cascade);GO:0045785(positive regulation of cell adhesion);GO:0044387(negative regulation of protein kinase activity by regulation of protein phosphoryla…	NA	NA	NA	dual specificity phosphatase 26 [Source:HGNC Symbol;Acc:HGNC:28161]	72.6646	67.104	17.3962	21.0144	15.4018	2.59733	1.37703	5.46153e-50	5.79839e-48	up	yes
ENSGALG00000031693		ENSGALT00000048129	NA	NA	NA	NA		12.8707	14.4077	2.26836	1.93771	2.45537	4.09497	2.03385	1.09364e-49	1.15188e-47	up	yes
ENSGALG00000008593	ATP1B4	ENSGALT00000039082;ENSGALT00000047228	GO:0005890(sodium:potassium-exchanging ATPase complex);GO:0006814(sodium ion transport);GO:0015992(proton transport);GO:0006811(ion transport);GO:0006813(potassium ion transport);GO:0006810(transport);GO:0016021(integral component of membrane);GO:0016020(membrane);GO:0005634(nucleus);GO:0006355(regulation of transcription, DNA-templated);GO:0005637(nuclear inner membrane);GO:0005637(nuclear inner…	04260(Cardiac muscle contraction);04261(Adrenergic signaling in cardiomyocytes);04261(Adrenergic signaling in cardiomyocytes)	K01540	NA	ATPase Na+/K+ transporting family member beta 4 [Source:HGNC Symbol;Acc:HGNC:808]	40.8891	53.8943	8.20282	10.8356	7.49004	3.5729	1.8371	1.39235e-49	1.45496e-47	up	yes
ENSGALG00000041478		ENSGALT00000055001	NA	NA	NA	NA		524.653	544.328	124.849	169.088	124.052	2.55744	1.3547	4.24782e-49	4.33637e-47	up	yes
ENSGALG00000012612	FBP2	ENSGALT00000020591;ENSGALT00000050142	GO:0070062(extracellular exosome);GO:0005886(plasma membrane);GO:0005654(nucleoplasm);GO:0030388(fructose 1,6-bisphosphate metabolic process);GO:0006002(fructose 6-phosphate metabolic process);GO:0006000(fructose metabolic process);GO:0005986(sucrose biosynthetic process);GO:0042802(identical protein binding);GO:0042132(fructose 1,6-bisphosphate 1-phosphatase activity);GO:0006094(gluconeogenesis)…	01200(Carbon metabolism);00010(Glycolysis / Gluconeogenesis);00030(Pentose phosphate pathway);00051(Fructose and mannose metabolism);04910(Insulin signaling pathway);04910(Insulin signaling pathway)	K03841	EC:3.1.3.11	fructose-bisphosphatase 2 [Source:HGNC Symbol;Acc:HGNC:3607]	12.9412	9.5878	0.38919	0.645236	0.355791	16.2054	4.0184	3.02092e-48	3.06036e-46	up	yes
ENSGALG00000016309	KLHL31	ENSGALT00000026310	GO:0042787(protein ubiquitination involved in ubiquitin-dependent protein catabolic process);GO:0031463(Cul3-RING ubiquitin ligase complex);GO:0004842(ubiquitin-protein transferase activity)	NA	NA	NA	kelch like family member 31 [Source:HGNC Symbol;Acc:HGNC:21353]	170.769	182.548	50.1471	62.8946	52.1729	2.13853	1.09662	3.21158e-48	3.22885e-46	up	yes
ENSGALG00000013941	PDE7B	ENSGALT00000022595	GO:0004114(3',5'-cyclic-nucleotide phosphodiesterase activity);GO:0008081(phosphoric diester hydrolase activity);GO:0016787(hydrolase activity);GO:0046872(metal ion binding);GO:0007165(signal transduction)	00230(Purine metabolism)	K18436	EC:3.1.4.53	phosphodiesterase 7B [Source:HGNC Symbol;Acc:HGNC:8792]	48.9881	57.2253	16.4106	15.5908	13.9128	2.3133	1.20995	4.34617e-48	4.33669e-46	up	yes
ENSGALG00000003521		ENSGALT00000005572;ENSGALT00000088923;ENSGALT00000006394;ENSGALT00000083084;ENSGALT00000084241;ENSGALT00000060647;ENSGALT00000085479;ENSGALT00000090247;ENSGALT00000084058;ENSGALT00000053608;ENSGALT00000077229;ENSGALT00000039589	GO:0046982(protein heterodimerization activity);GO:0008092(cytoskeletal protein binding);GO:0005515(protein binding);GO:0060048(cardiac muscle contraction);GO:0005884(actin filament);GO:0005862(muscle thin filament tropomyosin);GO:0042803(protein homodimerization activity);GO:0005886(plasma membrane);GO:0007015(actin filament organization);GO:0008307(structural constituent of muscle);GO:0051015(a…	04260(Cardiac muscle contraction);04261(Adrenergic signaling in cardiomyocytes);04261(Adrenergic signaling in cardiomyocytes)	K10373	NA		725.432	857.322	182.952	244.097	227.282	2.41889	1.27434	6.58737e-48	6.52396e-46	up	yes
ENSGALG00000002907	MYL1	ENSGALT00000040054;ENSGALT00000004587;ENSGALT00000089968	GO:0030016(myofibril);GO:0043520(regulation of myosin II filament assembly);GO:0006936(muscle contraction);GO:0016459(myosin complex);GO:0005509(calcium ion binding);GO:0005509(calcium ion binding)	NA	NA	NA	myosin light chain 1 [Source:HGNC Symbol;Acc:HGNC:7582]	1450.37	1519.01	342.413	466.581	441.563	2.37444	1.24759	9.13184e-48	8.97693e-46	up	yes
ENSGALG00000010256	TIPARP	ENSGALT00000016682	GO:0005634(nucleus);GO:0071407(cellular response to organic cyclic compound);GO:0060325(face morphogenesis);GO:0060021(palate development);GO:0048745(smooth muscle tissue development);GO:0048705(skeletal system morphogenesis);GO:0048008(platelet-derived growth factor receptor signaling pathway);GO:0045732(positive regulation of protein catabolic process);GO:0044236(multicellular organism metaboli…	NA	NA	NA	TCDD inducible poly(ADP-ribose) polymerase [Source:HGNC Symbol;Acc:HGNC:23696]	33.5517	33.6235	10.6969	10.6213	9.59976	2.17269	1.11948	1.2336e-47	1.19497e-45	up	yes
ENSGALG00000014221	YIPF7	ENSGALT00000022997	GO:0016021(integral component of membrane);GO:0016020(membrane)	NA	NA	NA	Yip1 domain family member 7 [Source:HGNC Symbol;Acc:HGNC:26825]	11.2597	11.2612	0.032767	0.229989	0.07413	66.8501	6.06286	1.73776e-47	1.67115e-45	up	yes
ENSGALG00000010747	FBLN5	ENSGALT00000017485;ENSGALT00000083123	GO:0071953(elastic fiber);GO:0070062(extracellular exosome);GO:0031012(extracellular matrix);GO:0005615(extracellular space);GO:2000121(regulation of removal of superoxide radicals);GO:0048251(elastic fiber assembly);GO:0046903(secretion);GO:0034394(protein localization to cell surface);GO:0030198(extracellular matrix organization);GO:0042803(protein homodimerization activity);GO:0008022(protein …	NA	NA	NA	fibulin 5 [Source:HGNC Symbol;Acc:HGNC:3602]	38.8377	42.3747	10.0146	7.12194	5.73145	3.55135	1.82837	2.50687e-47	2.39343e-45	up	yes
ENSGALG00000003261	CAVIN1	ENSGALT00000005163;ENSGALT00000005164	GO:0005901(caveola);GO:0005737(cytoplasm);GO:0003723(RNA binding);GO:0042134(rRNA primary transcript binding);GO:0006361(transcription initiation from RNA polymerase I promoter);GO:0006363(termination of RNA polymerase I transcription);GO:0005634(nucleus);GO:0005739(mitochondrion);GO:0005886(plasma membrane);GO:0043231(intracellular membrane-bounded organelle);GO:0043234(protein complex);GO:00451…	NA	NA	NA	caveolae associated protein 1 [Source:HGNC Symbol;Acc:HGNC:9688]	104.026	82.9571	21.886	29.1223	24.2678	2.48396	1.31264	2.99602e-47	2.84001e-45	up	yes
ENSGALG00000035393	LRRC14B	ENSGALT00000060875	NA	NA	NA	NA	leucine rich repeat containing 14B [Source:HGNC Symbol;Acc:HGNC:37268]	30.1208	17.7577	1.26485	0.557543	0.493992	20.6695	4.36943	3.30586e-47	3.11149e-45	up	yes
ENSGALG00000035017		ENSGALT00000084464;ENSGALT00000049208	NA	04920(Adipocytokine signaling pathway);05168(Herpes simplex infection);05168(Herpes simplex infection)	K07293	EC:3.1.3.48		19.9348	17.4264	4.82922	3.67396	3.10021	3.21985	1.687	3.66676e-47	3.42687e-45	up	yes
ENSGALG00000041819		ENSGALT00000079193	NA	NA	NA	NA		62.4385	71.9805	16.6405	15.0067	15.1601	2.87175	1.52193	7.28292e-47	6.74411e-45	up	yes
ENSGALG00000027353	C10orf71	ENSGALT00000045209	NA	NA	NA	NA	chromosome 10 open reading frame 71 [Source:HGNC Symbol;Acc:HGNC:26973]	94.2638	86.3875	24.9216	29.8479	21.3093	2.37453	1.24764	7.31785e-47	6.74411e-45	up	yes
ENSGALG00000005043		ENSGALT00000008087;ENSGALT00000061031	GO:0004075(biotin carboxylase activity);GO:0003989(acetyl-CoA carboxylase activity);GO:0016874(ligase activity);GO:0006633(fatty acid biosynthetic process);GO:0046872(metal ion binding);GO:0003824(catalytic activity);GO:0005524(ATP binding);GO:0000166(nucleotide binding);GO:0000166(nucleotide binding)	00620(Pyruvate metabolism);00640(Propanoate metabolism);00061(Fatty acid biosynthesis);00254(Aflatoxin biosynthesis);04910(Insulin signaling pathway);04920(Adipocytokine signaling pathway);04920(Adipocytokine signaling pathway)	K01946	EC:6.4.1.2;EC:6.3.4.14		6.82259	5.9823	0.602568	1.02242	0.723307	5.45285	2.44701	7.43309e-47	6.80307e-45	up	yes
ENSGALG00000035237	MAP3K20	ENSGALT00000051784	GO:0007050(cell cycle arrest);GO:0005634(nucleus);GO:0009314(response to radiation);GO:0006468(protein phosphorylation);GO:0004709(MAP kinase kinase kinase activity);GO:0000287(magnesium ion binding);GO:0043065(positive regulation of apoptotic process);GO:0003723(RNA binding);GO:0005524(ATP binding);GO:0004674(protein serine/threonine kinase activity);GO:0035556(intracellular signal transduction)…	NA	NA	NA	mitogen-activated protein kinase kinase kinase 20 [Source:HGNC Symbol;Acc:HGNC:17797]	73.4787	96.8789	24.115	17.2779	18.1642	2.86041	1.51622	8.79346e-47	7.99301e-45	up	yes
ENSGALG00000012594	NTRK2	ENSGALT00000086171;ENSGALT00000020568	GO:0043087(regulation of GTPase activity);GO:0008284(positive regulation of cell proliferation);GO:0043121(neurotrophin binding);GO:0010008(endosome membrane);GO:0005768(endosome);GO:0005030(neurotrophin receptor activity);GO:0001764(neuron migration);GO:0005887(integral component of plasma membrane);GO:0046777(protein autophosphorylation);GO:0048013(ephrin receptor signaling pathway);GO:0034765(…	04010(MAPK signaling pathway);04010(MAPK signaling pathway)	K04360	EC:2.7.10.1	neurotrophic receptor tyrosine kinase 2 [Source:HGNC Symbol;Acc:HGNC:8032]	11.0148	12.8875	2.20542	1.77762	2.41492	3.73592	1.90147	8.46791e-46	7.44223e-44	up	yes
ENSGALG00000005996	FSD2	ENSGALT00000009646	NA	NA	NA	NA	fibronectin type III and SPRY domain containing 2 [Source:HGNC Symbol;Acc:HGNC:18024]	21.9706	29.1459	2.02549	2.21477	3.75311	6.39486	2.67691	1.87706e-45	1.62813e-43	up	yes
ENSGALG00000006835	TNNC2	ENSGALT00000011060	GO:0005861(troponin complex);GO:0006937(regulation of muscle contraction);GO:0048306(calcium-dependent protein binding);GO:0003009(skeletal muscle contraction);GO:0003779(actin binding);GO:0005509(calcium ion binding);GO:0051015(actin filament binding);GO:0046872(metal ion binding)	04020(Calcium signaling pathway)	K12042	NA	troponin C2, fast skeletal type [Source:HGNC Symbol;Acc:HGNC:11944]	769.094	756.503	175.828	230.433	246.765	2.3362	1.22416	2.44286e-45	2.09156e-43	up	yes
ENSGALG00000039628	AFAP1L1	ENSGALT00000054757;ENSGALT00000070038;ENSGALT00000069646	NA	NA	NA	NA	actin filament associated protein 1 like 1 [Source:HGNC Symbol;Acc:HGNC:26714]	83.9077	92.8596	25.2884	32.161	27.4151	2.08294	1.05862	3.41664e-45	2.90655e-43	up	yes
ENSGALG00000037249	KCNQ5	ENSGALT00000060276;ENSGALT00000072077;ENSGALT00000046311	GO:0005887(integral component of plasma membrane);GO:0071805(potassium ion transmembrane transport);GO:0008076(voltage-gated potassium channel complex);GO:0005249(voltage-gated potassium channel activity);GO:0030118(clathrin coat);GO:0030118(clathrin coat)	NA	NA	NA	potassium voltage-gated channel subfamily Q member 5 [Source:HGNC Symbol;Acc:HGNC:6299]	17.211	18.0972	3.99129	4.21597	3.95112	2.90402	1.53805	4.77507e-45	4.0363e-43	up	yes
ENSGALG00000021869	PODN	ENSGALT00000017329	GO:0005737(cytoplasm);GO:0005615(extracellular space);GO:0030336(negative regulation of cell migration);GO:0008285(negative regulation of cell proliferation);GO:0005518(collagen binding);GO:0046426(negative regulation of JAK-STAT cascade);GO:0006469(negative regulation of protein kinase activity);GO:0004860(protein kinase inhibitor activity);GO:0019221(cytokine-mediated signaling pathway);GO:0031…	NA	NA	NA	podocan [Source:HGNC Symbol;Acc:HGNC:23174]	26.0351	24.522	5.85309	4.61898	5.59967	3.14572	1.65339	1.09111e-44	9.1646e-43	up	yes
ENSGALG00000013993		ENSGALT00000076033;ENSGALT00000022671;ENSGALT00000056157;ENSGALT00000022669;ENSGALT00000048188	GO:0015939(pantothenate metabolic process);GO:0017159(pantetheine hydrolase activity);GO:0016811(hydrolase activity, acting on carbon-nitrogen (but not peptide) bonds, in linear amides);GO:0006807(nitrogen compound metabolic process);GO:0016810(hydrolase activity, acting on carbon-nitrogen (but not peptide) bonds);GO:0016810(hydrolase activity, acting on carbon-nitrogen (but not peptide) bonds)	00770(Pantothenate and CoA biosynthesis);00770(Pantothenate and CoA biosynthesis)	K08069	EC:3.5.1.92		7.49907	7.86156	0.539844	1.09892	0.706685	6.54912	2.7113	1.15635e-44	9.65151e-43	up	yes
ENSGALG00000026536	IP6K3	ENSGALT00000045156	GO:0016301(kinase activity);GO:0016740(transferase activity);GO:0016310(phosphorylation);GO:0000831(inositol hexakisphosphate 6-kinase activity);GO:0006468(protein phosphorylation);GO:0032958(inositol phosphate biosynthetic process);GO:0046488(phosphatidylinositol metabolic process);GO:0005634(nucleus);GO:0005737(cytoplasm);GO:0000828(inositol hexakisphosphate kinase activity)	04070(Phosphatidylinositol signaling system)	K07756	EC:2.7.4.21	inositol hexakisphosphate kinase 3 [Source:HGNC Symbol;Acc:HGNC:17269]	109.9	81.7165	11.9007	20.2338	16.6241	3.92991	1.9745	1.96324e-44	1.61827e-42	up	yes
ENSGALG00000016281	DMD	ENSGALT00000026250;ENSGALT00000075829	GO:0045202(synapse);GO:0045121(membrane raft);GO:0044306(neuron projection terminus);GO:0042383(sarcolemma);GO:0030055(cell-substrate junction);GO:0030054(cell junction);GO:0030018(Z disc);GO:0016010(dystrophin-associated glycoprotein complex);GO:0005886(plasma membrane);GO:2000651(positive regulation of sodium ion transmembrane transporter activity);GO:1902083(negative regulation of peptidyl-cys…	NA	NA	NA	dystrophin [Source:HGNC Symbol;Acc:HGNC:2928]	164.125	174.086	47.9299	62.4588	52.0921	2.08154	1.05765	3.01619e-44	2.47086e-42	up	yes
ENSGALG00000009884	SYT14	ENSGALT00000069317;ENSGALT00000016068	GO:0006906(vesicle fusion);GO:0030276(clathrin binding);GO:0005509(calcium ion binding);GO:0019905(syntaxin binding);GO:0005886(plasma membrane);GO:0016021(integral component of membrane);GO:0016020(membrane);GO:0016020(membrane)	NA	NA	NA	synaptotagmin 14 [Source:HGNC Symbol;Acc:HGNC:23143]	11.1806	11.8349	1.1279	0.576252	0.769577	9.304	3.21785	4.41604e-44	3.57349e-42	up	yes
ENSGALG00000010090	FAM160A1	ENSGALT00000016413;ENSGALT00000059901	NA	NA	NA	NA	family with sequence similarity 160 member A1 [Source:HGNC Symbol;Acc:HGNC:34237]	7.6353	7.43018	1.4275	1.01495	1.61878	3.70959	1.89126	7.49947e-44	6.03185e-42	up	yes
ENSGALG00000032220		ENSGALT00000081183	NA	NA	NA	NA		31.0606	33.0786	8.21422	9.66879	9.41237	2.34982	1.23255	1.21525e-43	9.65727e-42	up	yes
ENSGALG00000001412	SEMA7A	ENSGALT00000002152	GO:0009897(external side of plasma membrane);GO:0016020(membrane);GO:0070374(positive regulation of ERK1 and ERK2 cascade);GO:0060907(positive regulation of macrophage cytokine production);GO:0050727(regulation of inflammatory response);GO:0048675(axon extension);GO:0045773(positive regulation of axon extension);GO:0031175(neuron projection development);GO:0021988(olfactory lobe development);GO:0…	NA	NA	NA	semaphorin 7A (John Milton Hagen blood group) [Source:HGNC Symbol;Acc:HGNC:10741]	93.4374	76.9081	19.6632	27.1194	19.6088	2.56578	1.3594	1.51517e-43	1.19689e-41	up	yes
ENSGALG00000014042	SSPN	ENSGALT00000022738	GO:0030133(transport vesicle);GO:0016010(dystrophin-associated glycoprotein complex);GO:0005887(integral component of plasma membrane);GO:0016021(integral component of membrane);GO:0016020(membrane)	NA	NA	NA	sarcospan [Source:HGNC Symbol;Acc:HGNC:11322]	95.6824	109.261	32.0302	29.9033	34.6325	2.12232	1.08564	1.61724e-43	1.26996e-41	up	yes
ENSGALG00000010616	PTPN21	ENSGALT00000072164;ENSGALT00000037643;ENSGALT00000074169	GO:0004725(protein tyrosine phosphatase activity);GO:0004721(phosphoprotein phosphatase activity);GO:0005856(cytoskeleton);GO:0016787(hydrolase activity);GO:0005737(cytoplasm);GO:0016311(dephosphorylation);GO:0035335(peptidyl-tyrosine dephosphorylation);GO:0006470(protein dephosphorylation);GO:0016791(phosphatase activity);GO:0016791(phosphatase activity)	NA	NA	NA	protein tyrosine phosphatase, non-receptor type 21 [Source:HGNC Symbol;Acc:HGNC:9651]	162.911	157.225	40.817	50.2153	56.5262	2.16955	1.1174	2.60987e-43	2.03738e-41	up	yes
ENSGALG00000005843	EEF1A2	ENSGALT00000009385	GO:0043209(myelin sheath);GO:0005853(eukaryotic translation elongation factor 1 complex);GO:0005737(cytoplasm);GO:0090218(positive regulation of lipid kinase activity);GO:0043065(positive regulation of apoptotic process);GO:0006414(translational elongation);GO:0019901(protein kinase binding);GO:0003746(translation elongation factor activity);GO:0003924(GTPase activity);GO:0005622(intracellular);G…	03013(RNA transport)	K03231	NA	eukaryotic translation elongation factor 1 alpha 2 [Source:HGNC Symbol;Acc:HGNC:3192]	1141.48	1031.35	256.538	367.262	286.072	2.38806	1.25584	3.57536e-43	2.75864e-41	up	yes
ENSGALG00000006572	TNNT3	ENSGALT00000085510;ENSGALT00000010620;ENSGALT00000010619;ENSGALT00000060938;ENSGALT00000086409	GO:0005861(troponin complex);GO:0006942(regulation of striated muscle contraction);GO:0006937(regulation of muscle contraction);GO:0043462(regulation of ATPase activity);GO:0003009(skeletal muscle contraction);GO:0048306(calcium-dependent protein binding);GO:0031013(troponin I binding);GO:0030899(calcium-dependent ATPase activity);GO:0030172(troponin C binding);GO:0005523(tropomyosin binding);GO:…	NA	NA	NA	Troponin T, fast skeletal muscle isoforms [Source:UniProtKB/Swiss-Prot;Acc:P12620]	1056.13	1161.81	258.291	367.342	329.708	2.32162	1.21513	7.07352e-43	5.42617e-41	up	yes
ENSGALG00000024298	ADAMTSL5	ENSGALT00000041053;ENSGALT00000071033	GO:0004222(metalloendopeptidase activity);GO:0006508(proteolysis);GO:0005576(extracellular region);GO:0008270(zinc ion binding);GO:0005578(proteinaceous extracellular matrix);GO:0005578(proteinaceous extracellular matrix)	NA	NA	NA	ADAMTS like 5 [Source:HGNC Symbol;Acc:HGNC:27912]	13.3103	14.9754	0.28534	0.914509	0.579611	15.8957	3.99057	1.54844e-42	1.16098e-40	up	yes
ENSGALG00000010087	IPO13	ENSGALT00000016399;ENSGALT00000056745	GO:0006606(protein import into nucleus);GO:0008536(Ran GTPase binding);GO:0006886(intracellular protein transport);GO:0005634(nucleus);GO:0005634(nucleus)	NA	NA	NA	importin-13 [Source:RefSeq peptide;Acc:NP_001006537]	38.7444	45.7704	11.6334	14.8694	12.7537	2.15289	1.10627	1.706e-42	1.27193e-40	up	yes
ENSGALG00000014848	TRDN	ENSGALT00000023965;ENSGALT00000054501	GO:0016529(sarcoplasmic reticulum);GO:0014701(junctional sarcoplasmic reticulum membrane);GO:0005886(plasma membrane);GO:0005829(cytosol);GO:0086036(regulation of cardiac muscle cell membrane potential);GO:0060316(positive regulation of ryanodine-sensitive calcium-release channel activity);GO:0060047(heart contraction);GO:0010880(regulation of release of sequestered calcium ion into cytosol by sa…	NA	NA	NA	triadin [Source:HGNC Symbol;Acc:HGNC:12261]	28.8682	27.5653	5.35884	3.51984	2.91098	4.7867	2.25903	1.91354e-42	1.41869e-40	up	yes
ENSGALG00000034140	ZNF395	ENSGALT00000056717	GO:0006357(regulation of transcription from RNA polymerase II promoter);GO:0005737(cytoplasm);GO:0005634(nucleus);GO:0003677(DNA binding);GO:0005829(cytosol);GO:0000978(RNA polymerase II core promoter proximal region sequence-specific DNA binding);GO:0001158(enhancer sequence-specific DNA binding)	NA	NA	NA	zinc finger protein 395 [Source:HGNC Symbol;Acc:HGNC:18737]	57.1867	61.5994	18.5383	17.4693	21.6671	2.05959	1.04236	5.57787e-42	4.11244e-40	up	yes
ENSGALG00000043064		ENSGALT00000069086	NA	NA	NA	NA		34.3736	27.1029	2.72216	3.53621	3.25425	6.46263	2.69212	1.15832e-40	8.22036e-39	up	yes
ENSGALG00000009368	RGS6	ENSGALT00000044464	GO:0005834(heterotrimeric G-protein complex);GO:0004871(signal transducer activity);GO:0007186(G-protein coupled receptor signaling pathway);GO:0035556(intracellular signal transduction);GO:0005096(GTPase activator activity);GO:0043547(positive regulation of GTPase activity);GO:0005829(cytosol);GO:0019898(extrinsic component of membrane)	NA	NA	NA	regulator of G protein signaling 6 [Source:HGNC Symbol;Acc:HGNC:10002]	6.08418	5.43224	0.289517	0.097546	0.281598	17.2231	4.10627	1.58686e-40	1.10838e-38	up	yes
ENSGALG00000027864	NFKBIA	ENSGALT00000045536	GO:0008139(nuclear localization sequence binding);GO:0019899(enzyme binding);GO:0031625(ubiquitin protein ligase binding);GO:0042802(identical protein binding);GO:0051059(NF-kappaB binding);GO:0000060(protein import into nucleus, translocation);GO:0007253(cytoplasmic sequestering of NF-kappaB);GO:0010468(regulation of gene expression);GO:0010745(negative regulation of macrophage derived foam cell…	04210(Apoptosis);04620(Toll-like receptor signaling pathway);04621(NOD-like receptor signaling pathway);04622(RIG-I-like receptor signaling pathway);04623(Cytosolic DNA-sensing pathway);04920(Adipocytokine signaling pathway);05164(Influenza A);05168(Herpes simplex infection)	K04734	NA	NFKB inhibitor alpha [Source:HGNC Symbol;Acc:HGNC:7797]	111.52	114.61	30.9076	42.264	37.3152	2.04667	1.03328	3.49964e-40	2.43161e-38	up	yes
ENSGALG00000010645	ENPP6	ENSGALT00000017317	GO:0070062(extracellular exosome);GO:0005886(plasma membrane);GO:0005576(extracellular region);GO:0019695(choline metabolic process);GO:0006629(lipid metabolic process);GO:0047390(glycerophosphocholine cholinephosphodiesterase activity);GO:0008889(glycerophosphodiester phosphodiesterase activity);GO:0008081(phosphoric diester hydrolase activity);GO:0008152(metabolic process);GO:0003824(catalytic …	00565(Ether lipid metabolism)	K08743	EC:3.1.4.-	ectonucleotide pyrophosphatase/phosphodiesterase 6 [Source:HGNC Symbol;Acc:HGNC:23409]	36.4987	35.1904	6.45013	8.97121	5.91501	3.35995	1.74844	4.39571e-40	3.03831e-38	up	yes
ENSGALG00000043925		ENSGALT00000086446	NA	NA	NA	NA		40.9524	38.5067	3.85862	7.03461	4.05938	5.31406	2.40981	9.27726e-40	6.31377e-38	up	yes
ENSGALG00000016342	MYOM2	ENSGALT00000026360;ENSGALT00000056879	GO:0031430(M band);GO:0005739(mitochondrion);GO:0006936(muscle contraction);GO:0005859(muscle myosin complex);GO:0071688(striated muscle myosin thick filament assembly);GO:0045214(sarcomere organization);GO:0007015(actin filament organization);GO:0006941(striated muscle contraction);GO:0097493(structural molecule activity conferring elasticity);GO:0051371(muscle alpha-actinin binding);GO:0008307(…	NA	NA	NA	myomesin 2 [Source:HGNC Symbol;Acc:HGNC:7614]	501.97	549.941	141.862	196.831	154.532	2.13272	1.09269	1.31823e-39	8.88032e-38	up	yes
ENSGALG00000036871		ENSGALT00000059623	NA	NA	NA	NA		107.657	90.0382	28.4699	30.0033	19.941	2.52116	1.33409	1.59295e-39	1.06768e-37	up	yes
ENSGALG00000034615		ENSGALT00000046530	NA	NA	NA	NA		31.1512	28.3162	7.73976	7.74933	7.53795	2.5825	1.36877	3.9099e-39	2.58151e-37	up	yes
ENSGALG00000006508	FGF13	ENSGALT00000010519;ENSGALT00000083612;ENSGALT00000054177	GO:0043005(neuron projection);GO:0030426(growth cone);GO:0030425(dendrite);GO:0030424(axon);GO:0030175(filopodium);GO:0016328(lateral plasma membrane);GO:0014704(intercalated disc);GO:0005886(plasma membrane);GO:0005874(microtubule);GO:0005829(cytosol);GO:0005737(cytoplasm);GO:0005634(nucleus);GO:0098909(regulation of cardiac muscle cell action potential involved in regulation of contraction);GO:…	04010(MAPK signaling pathway);04810(Regulation of actin cytoskeleton);04810(Regulation of actin cytoskeleton)	K04358	NA	fibroblast growth factor 13 [Source:HGNC Symbol;Acc:HGNC:3670]	53.7186	65.3565	19.6722	20.1245	16.6894	2.10804	1.0759	4.73239e-39	3.10909e-37	up	yes
ENSGALG00000011447	GADL1	ENSGALT00000018667	GO:0016831(carboxy-lyase activity);GO:0019752(carboxylic acid metabolic process);GO:0030170(pyridoxal phosphate binding);GO:0016829(lyase activity);GO:0003824(catalytic activity)	00410(beta-Alanine metabolism);00430(Taurine and hypotaurine metabolism);00770(Pantothenate and CoA biosynthesis)	K18966	EC:4.1.1.29;EC:4.1.1.11	glutamate decarboxylase like 1 [Source:HGNC Symbol;Acc:HGNC:27949]	6.91784	6.43513	0.089635	0.113497	0.221696	31.4315	4.97414	1.04734e-38	6.84693e-37	up	yes
ENSGALG00000040995		ENSGALT00000060298	NA	NA	NA	NA		654.809	871.749	222.148	275.169	236.847	2.07932	1.05611	2.07552e-38	1.35021e-36	up	yes
ENSGALG00000013722	SEMA3B	ENSGALT00000062751;ENSGALT00000035861;ENSGALT00000061939;ENSGALT00000057336	GO:0005615(extracellular space);GO:0050919(negative chemotaxis);GO:0038191(neuropilin binding);GO:0038191(neuropilin binding)	NA	NA	NA	semaphorin 3B [Source:HGNC Symbol;Acc:HGNC:10724]	20.7482	17.4392	6.17882	5.69064	5.2214	2.23438	1.15987	6.85537e-38	4.41639e-36	up	yes
ENSGALG00000034344	MTHFD2	ENSGALT00000048490	NA	00670(One carbon pool by folate)	K13403	EC:1.5.1.15;EC:3.5.4.9	methylenetetrahydrofolate dehydrogenase (NADP+ dependent) 2, methenyltetrahydrofolate cyclohydrolase [Source:HGNC Symbol;Acc:HGNC:7434]	43.6563	60.7166	9.73179	14.1815	10.1233	3.06649	1.61659	8.3131e-38	5.304e-36	up	yes
ENSGALG00000026875		ENSGALT00000043146	NA	NA	NA	NA		10.3108	12.1487	1.44133	0.854499	0.84397	7.15318	2.83858	1.92223e-37	1.22057e-35	up	yes
ENSGALG00000029151		ENSGALT00000044983	GO:0016021(integral component of membrane);GO:0016020(membrane)	NA	NA	NA		65.4379	103.303	1.29167	4.91655	2.7939	18.7445	4.2284	4.07134e-37	2.53666e-35	up	yes
ENSGALG00000033766	gga-mir-7474	ENSGALT00000064485	NA	NA	NA	NA	gga-mir-7474 [Source:miRBase;Acc:MI0024147]	3115.11	3432.64	925.183	1286.12	1018	2.02761	1.01978	6.09279e-37	3.72615e-35	up	yes
ENSGALG00000018946	LMOD3	ENSGALT00000029893	GO:0006936(muscle contraction);GO:0031672(A band);GO:0007015(actin filament organization);GO:0051694(pointed-end actin filament capping);GO:0005523(tropomyosin binding);GO:0030239(myofibril assembly);GO:0003785(actin monomer binding);GO:0003779(actin binding);GO:0048741(skeletal muscle fiber development);GO:0005865(striated muscle thin filament);GO:0006941(striated muscle contraction);GO:0030240(…	NA	NA	NA	leiomodin 3 [Source:HGNC Symbol;Acc:HGNC:6649]	67.2037	73.5112	12.3559	20.8831	17.6058	2.76754	1.4686	3.58038e-36	2.10244e-34	up	yes
ENSGALG00000039536	PPDPFL	ENSGALT00000078058	NA	NA	NA	NA	pancreatic progenitor cell differentiation and proliferation factor like [Source:HGNC Symbol;Acc:HGNC:31745]	5.56258	5.56474	0.066813	0	0	166.544	7.37976	1.42712e-35	8.27042e-34	up	yes
ENSGALG00000031094	EDA2R	ENSGALT00000059672	NA	04060(Cytokine-cytokine receptor interaction)	K05163	NA	ectodysplasin A2 receptor [Source:HGNC Symbol;Acc:HGNC:17756]	56.7883	51.7723	12.4473	18.5985	15.325	2.34114	1.22721	1.8373e-35	1.05553e-33	up	yes
ENSGALG00000013627	SLC7A2	ENSGALT00000022171;ENSGALT00000090063;ENSGALT00000045211;ENSGALT00000089980;ENSGALT00000078736;ENSGALT00000058572	GO:0006865(amino acid transport);GO:0003333(amino acid transmembrane transport);GO:0015171(amino acid transmembrane transporter activity);GO:0016021(integral component of membrane);GO:0016020(membrane);GO:1903826(arginine transmembrane transport);GO:0000064(L-ornithine transmembrane transporter activity);GO:0005289(high-affinity arginine transmembrane transporter activity);GO:0005292(high-affinit…	NA	NA	NA	solute carrier family 7 member 2 [Source:HGNC Symbol;Acc:HGNC:11060]	11.5631	13.3031	3.69368	3.61254	2.50709	2.53392	1.34137	2.31796e-35	1.32024e-33	up	yes
ENSGALG00000028871	SLC38A3	ENSGALT00000043109	GO:0089709(L-histidine transmembrane transport);GO:0006867(asparagine transport);GO:0015186(L-glutamine transmembrane transporter activity);GO:0015182(L-asparagine transmembrane transporter activity);GO:0005290(L-histidine transmembrane transporter activity);GO:0005887(integral component of plasma membrane);GO:0016021(integral component of membrane);GO:0016020(membrane);GO:0015180(L-alanine trans…	NA	NA	NA	solute carrier family 38 member 3 [Source:HGNC Symbol;Acc:HGNC:18044]	16.2173	17.0953	0.136664	0.490429	0.069406	47.8285	5.5798	2.61999e-35	1.47957e-33	up	yes
ENSGALG00000011202	COLQ	ENSGALT00000073113;ENSGALT00000061736;ENSGALT00000059516;ENSGALT00000018265;ENSGALT00000060446	GO:0005886(plasma membrane);GO:0030054(cell junction);GO:0031594(neuromuscular junction);GO:0008582(regulation of synaptic growth at neuromuscular junction);GO:0071340(skeletal muscle acetylcholine-gated channel clustering);GO:0090150(establishment of protein localization to membrane);GO:0090150(establishment of protein localization to membrane)	NA	NA	NA	collagen like tail subunit of asymmetric acetylcholinesterase [Source:HGNC Symbol;Acc:HGNC:2226]	21.5018	17.2313	2.96016	3.78362	2.42944	4.22241	2.07807	2.64103e-35	1.48513e-33	up	yes
ENSGALG00000008418	LARGE2	ENSGALT00000038363	GO:0035269(protein O-linked mannosylation);GO:0016757(transferase activity, transferring glycosyl groups);GO:0016740(transferase activity)	00515(Mannose type O-glycan biosyntheis)	K09668	EC:2.4.2.-;EC:2.4.1.-	LARGE xylosyl- and glucuronyltransferase 2 [Source:HGNC Symbol;Acc:HGNC:16522]	18.3921	20.6655	6.20486	5.24619	4.95728	2.38035	1.25117	4.61283e-35	2.5507e-33	up	yes
ENSGALG00000038512	AGTR1	ENSGALT00000048034	GO:0038166(angiotensin-activated signaling pathway);GO:0004945(angiotensin type II receptor activity);GO:0019229(regulation of vasoconstriction);GO:0005886(plasma membrane);GO:0007186(G-protein coupled receptor signaling pathway);GO:0007165(signal transduction);GO:0004930(G-protein coupled receptor activity);GO:0004871(signal transducer activity);GO:0016021(integral component of membrane);GO:0016…	04371(Apelin signaling pathway);04020(Calcium signaling pathway);04080(Neuroactive ligand-receptor interaction);04261(Adrenergic signaling in cardiomyocytes);04270(Vascular smooth muscle contraction);04933(AGE-RAGE signaling pathway in diabetic complications)	K04166	NA	Type-1 angiotensin II receptor [Source:UniProtKB/Swiss-Prot;Acc:P79785]	28.4406	32.2572	7.53161	5.48857	4.39379	3.48558	1.8014	2.20655e-34	1.18555e-32	up	yes
ENSGALG00000005589	SYNGR3	ENSGALT00000008969	GO:0031594(neuromuscular junction);GO:0030672(synaptic vesicle membrane);GO:0016021(integral component of membrane);GO:0016020(membrane);GO:0042169(SH2 domain binding);GO:0047485(protein N-terminus binding);GO:0021762(substantia nigra development);GO:0032411(positive regulation of transporter activity);GO:0008021(synaptic vesicle);GO:0045202(synapse);GO:0045055(regulated exocytosis)	NA	NA	NA	synaptogyrin 3 [Source:HGNC Symbol;Acc:HGNC:11501]	22.384	15.9646	4.60049	4.31635	5.76626	2.61176	1.38502	2.46789e-34	1.31531e-32	up	yes
ENSGALG00000038748		ENSGALT00000068027	NA	NA	NA	NA		21.6374	19.8804	4.90449	3.82369	4.9077	3.04475	1.60632	2.8741e-34	1.52569e-32	up	yes
ENSGALG00000006392	RNF168	ENSGALT00000010322	GO:0010212(response to ionizing radiation);GO:0000151(ubiquitin ligase complex);GO:0006302(double-strand break repair);GO:0004842(ubiquitin-protein transferase activity);GO:0043130(ubiquitin binding);GO:0003682(chromatin binding);GO:0042393(histone binding);GO:0043234(protein complex);GO:0035861(site of double-strand break);GO:0005829(cytosol);GO:0005654(nucleoplasm);GO:0005634(nucleus);GO:007053…	NA	NA	NA	ring finger protein 168 [Source:HGNC Symbol;Acc:HGNC:26661]	23.0049	25.4991	7.39172	7.41792	9.29592	2.01215	1.00874	2.04457e-33	1.03959e-31	up	yes
ENSGALG00000036742		ENSGALT00000074456;ENSGALT00000068322;ENSGALT00000064978	NA	NA	NA	NA		44.5513	44.8919	10.572	16.0307	13.8713	2.20989	1.14398	2.16223e-33	1.09351e-31	up	yes
ENSGALG00000021525		ENSGALT00000034796	NA	NA	NA	NA		41.7811	38.009	13.2567	11.7053	10.1015	2.27559	1.18624	2.16708e-33	1.09351e-31	up	yes
ENSGALG00000011618	ADSSL1	ENSGALT00000018983	GO:0005737(cytoplasm);GO:0046040(IMP metabolic process);GO:0044208('de novo' AMP biosynthetic process);GO:0006167(AMP biosynthetic process);GO:0006163(purine nucleotide metabolic process);GO:0004019(adenylosuccinate synthase activity);GO:0006164(purine nucleotide biosynthetic process);GO:0000287(magnesium ion binding);GO:0005525(GTP binding);GO:0016874(ligase activity);GO:0046872(metal ion bindin…	00230(Purine metabolism);00250(Alanine, aspartate and glutamate metabolism)	K01939	EC:6.3.4.4	adenylosuccinate synthase like 1 [Source:HGNC Symbol;Acc:HGNC:20093]	65.0934	73.046	24.9827	18.7494	15.5482	2.33027	1.2205	2.26403e-33	1.13381e-31	up	yes
ENSGALG00000002431		ENSGALT00000003831	NA	NA	NA	NA		20.8312	21.1501	4.23542	4.67619	2.27659	3.75228	1.90777	2.83644e-33	1.40457e-31	up	yes
ENSGALG00000026817		ENSGALT00000045040	GO:0003854(3-beta-hydroxy-delta5-steroid dehydrogenase activity);GO:0006694(steroid biosynthetic process);GO:0016616(oxidoreductase activity, acting on the CH-OH group of donors, NAD or NADP as acceptor);GO:0055114(oxidation-reduction process);GO:0016021(integral component of membrane);GO:0016020(membrane)	NA	NA	NA		26.3572	21.1787	5.07778	5.30108	4.77164	3.13758	1.64965	4.75081e-33	2.33511e-31	up	yes
ENSGALG00000006637		ENSGALT00000010722	GO:0016021(integral component of membrane);GO:0016020(membrane)	NA	NA	NA		32.0478	37.4739	10.3151	10.6944	10.7371	2.18989	1.13086	8.1105e-33	3.97175e-31	up	yes
ENSGALG00000041459	DDIT4	ENSGALT00000080768	GO:0042771(intrinsic apoptotic signaling pathway in response to DNA damage by p53 class mediator);GO:0001666(response to hypoxia);GO:0032007(negative regulation of TOR signaling);GO:0051607(defense response to virus);GO:0005737(cytoplasm);GO:0005829(cytosol);GO:0005739(mitochondrion);GO:0005622(intracellular);GO:0045820(negative regulation of glycolytic process);GO:0072593(reactive oxygen species…	04150(mTOR signaling pathway);04140(Autophagy - animal)	K08270	NA	DNA damage inducible transcript 4 [Source:HGNC Symbol;Acc:HGNC:24944]	42.4283	61.8553	7.74974	9.67669	8.64221	4.00035	2.00013	9.07261e-33	4.42656e-31	up	yes
ENSGALG00000035804	SQSTM1	ENSGALT00000062831;ENSGALT00000089964;ENSGALT00000082709;ENSGALT00000084932;ENSGALT00000083981	GO:0007032(endosome organization);GO:0019901(protein kinase binding);GO:0042802(identical protein binding);GO:0016605(PML body);GO:0016236(macroautophagy);GO:0000932(P-body);GO:0019899(enzyme binding);GO:0043130(ubiquitin binding);GO:0006914(autophagy);GO:0005737(cytoplasm);GO:0005776(autophagosome);GO:0031625(ubiquitin protein ligase binding);GO:0005829(cytosol);GO:0070062(extracellular exosome)…	04137(Mitophagy - animal);04217(Necroptosis);04218(Cellular senescence);04218(Cellular senescence)	K14381	NA	sequestosome 1 [Source:HGNC Symbol;Acc:HGNC:11280]	28.7376	31.5697	10.371	9.6063	9.68564	2.03308	1.02367	1.05046e-32	5.10646e-31	up	yes
ENSGALG00000030900	NCMAP	ENSGALT00000071199	NA	NA	NA	NA	non-compact myelin associated protein [Source:HGNC Symbol;Acc:HGNC:29332]	21.4804	26.2286	7.16779	6.43292	5.83819	2.45431	1.29532	3.20253e-32	1.52881e-30	up	yes
ENSGALG00000040623		ENSGALT00000080693	NA	NA	NA	NA		42.5817	42.6924	7.55947	12.0496	10.1057	2.86976	1.52093	4.16449e-32	1.9668e-30	up	yes
ENSGALG00000007356	MAP3K8	ENSGALT00000011897;ENSGALT00000078860;ENSGALT00000062035	GO:0007346(regulation of mitotic cell cycle);GO:0042981(regulation of apoptotic process);GO:0004674(protein serine/threonine kinase activity);GO:0005737(cytoplasm);GO:0006468(protein phosphorylation);GO:0005524(ATP binding);GO:0004672(protein kinase activity);GO:0031098(stress-activated protein kinase signaling cascade);GO:0023014(signal transduction by protein phosphorylation);GO:0032147(activat…	04010(MAPK signaling pathway);04620(Toll-like receptor signaling pathway);04620(Toll-like receptor signaling pathway)	K04415	EC:2.7.11.25	mitogen-activated protein kinase kinase kinase 8 [Source:HGNC Symbol;Acc:HGNC:6860]	17.6007	14.188	1.63364	2.50851	1.10065	6.0633	2.6001	6.01384e-32	2.82013e-30	up	yes
ENSGALG00000040573	FMO3	ENSGALT00000053729	GO:0004497(monooxygenase activity);GO:0055114(oxidation-reduction process);GO:0050660(flavin adenine dinucleotide binding);GO:0004499(N,N-dimethylaniline monooxygenase activity);GO:0050661(NADP binding);GO:0016491(oxidoreductase activity);GO:0016021(integral component of membrane);GO:0016020(membrane)	00982(Drug metabolism - cytochrome P450)	K00485	EC:1.14.13.8	flavin containing monooxygenase 3 [Source:HGNC Symbol;Acc:HGNC:3771]	36.5445	31.0484	1.18279	0.716722	0.134135	33.2373	5.05473	9.33659e-31	4.2002e-29	up	yes
ENSGALG00000028318	CDKN1A	ENSGALT00000044994	GO:0007346(regulation of mitotic cell cycle);GO:0007050(cell cycle arrest);GO:0005634(nucleus);GO:0004861(cyclin-dependent protein serine/threonine kinase inhibitor activity);GO:0019912(cyclin-dependent protein kinase activating kinase activity);GO:0030332(cyclin binding);GO:0031625(ubiquitin protein ligase binding);GO:0000079(regulation of cyclin-dependent protein serine/threonine kinase activit…	04012(ErbB signaling pathway);04068(FoxO signaling pathway);04110(Cell cycle);04115(p53 signaling pathway);04218(Cellular senescence)	K06625	NA	cyclin-dependent kinase inhibitor 1A (p21, Cip1) [Source:RefSeq peptide;Acc:NP_989727]	10.4558	8.18469	1.0568	0.852699	0.637753	7.31787	2.87142	9.93587e-31	4.45469e-29	up	yes
ENSGALG00000016767		ENSGALT00000027071	NA	NA	NA	NA		14.2793	14.2328	2.92283	2.16289	3.24845	3.42111	1.77447	1.01424e-30	4.532e-29	up	yes
ENSGALG00000031502		ENSGALT00000075851;ENSGALT00000081751	NA	NA	NA	NA		17.1777	17.4516	3.77335	2.77318	3.13073	3.57842	1.83932	2.66594e-30	1.1562e-28	up	yes
ENSGALG00000012034	ADSL	ENSGALT00000019639	GO:0005739(mitochondrion);GO:0044208('de novo' AMP biosynthetic process);GO:0051262(protein tetramerization);GO:0009152(purine ribonucleotide biosynthetic process);GO:0006167(AMP biosynthetic process);GO:0070626((S)-2-(5-amino-1-(5-phospho-D-ribosyl)imidazole-4-carboxamido)succinate AMP-lyase (fumarate-forming) activity);GO:0004018(N6-(1,2-dicarboxyethyl)AMP AMP-lyase (fumarate-forming) activity)…	00230(Purine metabolism);00250(Alanine, aspartate and glutamate metabolism)	K01756	EC:4.3.2.2	adenylosuccinate lyase [Source:RefSeq peptide;Acc:NP_990860]	523.49	542.291	149.512	212.786	130.862	2.16113	1.11178	6.43378e-30	2.73662e-28	up	yes
ENSGALG00000017862	SNORA23	ENSGALT00000028569	NA	NA	NA	NA	Small nucleolar RNA SNORA23 [Source:RFAM;Acc:RF00319]	870.284	489.725	186.323	169.122	198.246	2.45626	1.29646	6.5193e-30	2.76414e-28	up	yes
ENSGALG00000014453	FAM46C	ENSGALT00000023336	GO:0016779(nucleotidyltransferase activity);GO:0016740(transferase activity)	NA	NA	NA	family with sequence similarity 46 member C [Source:HGNC Symbol;Acc:HGNC:24712]	40.9433	52.9685	12.6118	11.554	6.66302	3.04623	1.60703	1.01974e-29	4.25563e-28	up	yes
ENSGALG00000043390		ENSGALT00000059989;ENSGALT00000056534	NA	NA	NA	NA		6.13875	7.37833	2.04414	1.92106	1.62927	2.41615	1.27271	1.1166e-29	4.64525e-28	up	yes
ENSGALG00000043389	PPARGC1B	ENSGALT00000052693	GO:0016592(mediator complex);GO:0030374(ligand-dependent nuclear receptor transcription coactivator activity);GO:0001104(RNA polymerase II transcription cofactor activity);GO:0045944(positive regulation of transcription from RNA polymerase II promoter);GO:0006355(regulation of transcription, DNA-templated);GO:0005634(nucleus);GO:0045780(positive regulation of bone resorption);GO:0030331(estrogen …	NA	NA	NA	PPARG coactivator 1 beta [Source:HGNC Symbol;Acc:HGNC:30022]	7.34823	8.06689	1.51803	1.81939	1.34588	3.2915	1.71875	1.8346e-29	7.46841e-28	up	yes
ENSGALG00000032619	SYPL2	ENSGALT00000048967	GO:0021762(substantia nigra development);GO:0006874(cellular calcium ion homeostasis)	NA	NA	NA	synaptophysin like 2 [Source:HGNC Symbol;Acc:HGNC:27638]	278.382	352.289	11.3598	36.488	32.8979	7.81058	2.96543	8.13944e-29	3.2438e-27	up	yes
ENSGALG00000002638		ENSGALT00000004154;ENSGALT00000079356;ENSGALT00000066756	GO:0016021(integral component of membrane);GO:0016020(membrane);GO:0016020(membrane)	01200(Carbon metabolism);01230(Biosynthesis of amino acids);00260(Glycine, serine and threonine metabolism);00290(Valine, leucine and isoleucine biosynthesis);00290(Valine, leucine and isoleucine biosynthesis)	K01754	EC:4.3.1.19		17.9719	16.5908	6.17795	5.90283	4.43152	2.09315	1.06568	2.34331e-28	9.06651e-27	up	yes
ENSGALG00000023279	EPN3	ENSGALT00000071041;ENSGALT00000038280	GO:0070062(extracellular exosome);GO:0048471(perinuclear region of cytoplasm);GO:0043231(intracellular membrane-bounded organelle);GO:0030136(clathrin-coated vesicle);GO:0019897(extrinsic component of plasma membrane);GO:0005905(clathrin-coated pit);GO:0005654(nucleoplasm);GO:0005634(nucleus);GO:1990175(EH domain binding);GO:1990175(EH domain binding)	NA	NA	NA	epsin 3 [Source:HGNC Symbol;Acc:HGNC:18235]	47.0215	54.6993	13.1975	20.0783	16.8292	2.03015	1.02159	2.67157e-28	1.02766e-26	up	yes
ENSGALG00000046564	ASB18	ENSGALT00000086953	NA	NA	NA	NA	ankyrin repeat and SOCS box containing 18 [Source:HGNC Symbol;Acc:HGNC:19770]	7.40677	11.7446	0	0	0.217156	88.192	6.46258	2.88335e-28	1.10592e-26	up	yes
ENSGALG00000006346	CXCL14	ENSGALT00000010256	GO:0060326(cell chemotaxis);GO:0006955(immune response);GO:0008009(chemokine activity);GO:0007267(cell-cell signaling);GO:0005576(extracellular region);GO:0045662(negative regulation of myoblast differentiation);GO:0048839(inner ear development);GO:2000503(positive regulation of natural killer cell chemotaxis);GO:0005794(Golgi apparatus)	04060(Cytokine-cytokine receptor interaction)	K10033	NA	C-X-C motif chemokine ligand 14 [Source:HGNC Symbol;Acc:HGNC:10640]	30.6726	31.6469	3.32125	3.65321	1.1566	7.66437	2.93817	3.72542e-28	1.42069e-26	up	yes
ENSGALG00000003802	OTUD7A	ENSGALT00000006032	GO:0035871(protein K11-linked deubiquitination);GO:0004843(thiol-dependent ubiquitin-specific protease activity);GO:0071947(protein deubiquitination involved in ubiquitin-dependent protein catabolic process);GO:0071108(protein K48-linked deubiquitination);GO:0045088(regulation of innate immune response);GO:0070536(protein K63-linked deubiquitination);GO:0043124(negative regulation of I-kappaB kin…	NA	NA	NA	OTU deubiquitinase 7A [Source:HGNC Symbol;Acc:HGNC:20718]	18.2256	16.2783	6.5933	5.0475	5.46446	2.01715	1.01232	4.25238e-28	1.617e-26	up	yes
ENSGALG00000029746	NT5DC3	ENSGALT00000069512	NA	NA	NA	NA	5'-nucleotidase domain containing 3 [Source:HGNC Symbol;Acc:HGNC:30826]	14.2223	18.1809	3.74176	3.69108	4.00088	2.83401	1.50284	4.6834e-28	1.77581e-26	up	yes
ENSGALG00000010001	EGLN3	ENSGALT00000016249;ENSGALT00000072474	GO:0031418(L-ascorbic acid binding);GO:0016705(oxidoreductase activity, acting on paired donors, with incorporation or reduction of molecular oxygen);GO:0016491(oxidoreductase activity);GO:0005506(iron ion binding);GO:0055114(oxidation-reduction process);GO:0001666(response to hypoxia);GO:0006915(apoptotic process);GO:0005737(cytoplasm);GO:0005634(nucleus);GO:0005829(cytosol);GO:0006919(activatio…	NA	NA	NA	egl-9 family hypoxia inducible factor 3 [Source:HGNC Symbol;Acc:HGNC:14661]	29.2966	24.7159	4.8622	7.27843	5.99944	2.97752	1.57411	5.11224e-28	1.93289e-26	up	yes
ENSGALG00000029150	AK1	ENSGALT00000043760	GO:0036126(sperm flagellum);GO:0005886(plasma membrane);GO:0005829(cytosol);GO:0005737(cytoplasm);GO:0009142(nucleoside triphosphate biosynthetic process);GO:0007050(cell cycle arrest);GO:0006165(nucleoside diphosphate phosphorylation);GO:0004017(adenylate kinase activity);GO:0019205(nucleobase-containing compound kinase activity);GO:0046034(ATP metabolic process);GO:0004550(nucleoside diphosphat…	00230(Purine metabolism);00730(Thiamine metabolism)	K00939	EC:2.7.4.3	adenylate kinase 1 [Source:HGNC Symbol;Acc:HGNC:361]	145.472	147.044	22.3816	42.9668	21.7922	3.35683	1.7471	5.59047e-28	2.1077e-26	up	yes
ENSGALG00000034397	ENPP1	ENSGALT00000066498	GO:0005886(plasma membrane);GO:0004527(exonuclease activity);GO:0005765(lysosomal membrane);GO:0032869(cellular response to insulin stimulus);GO:0009986(cell surface);GO:0005524(ATP binding);GO:0042803(protein homodimerization activity);GO:0005615(extracellular space);GO:0030308(negative regulation of cell growth);GO:0046325(negative regulation of glucose import);GO:0046627(negative regulation of…	NA	NA	NA	ectonucleotide pyrophosphatase/phosphodiesterase 1 [Source:HGNC Symbol;Acc:HGNC:3356]	13.3969	11.3413	3.02477	2.19343	2.64787	3.14493	1.65303	7.0296e-28	2.5986e-26	up	yes
ENSGALG00000033635	PTGS2	ENSGALT00000047966;ENSGALT00000048282;ENSGALT00000068693;ENSGALT00000067436	GO:0019371(cyclooxygenase pathway);GO:0008217(regulation of blood pressure);GO:0004666(prostaglandin-endoperoxide synthase activity);GO:0006693(prostaglandin metabolic process);GO:0001516(prostaglandin biosynthetic process);GO:0020037(heme binding);GO:0004601(peroxidase activity);GO:0006979(response to oxidative stress);GO:0051213(dioxygenase activity);GO:0006631(fatty acid metabolic process);GO:…	00590(Arachidonic acid metabolism);04370(VEGF signaling pathway);04370(VEGF signaling pathway)	K11987	EC:1.14.99.1	Prostaglandin G/H synthase 2 [Source:UniProtKB/Swiss-Prot;Acc:P27607]	5.36011	4.45076	0.465638	0.802343	0.88324	4.56061	2.18923	1.32381e-27	4.81324e-26	up	yes
ENSGALG00000039821		ENSGALT00000060021	NA	NA	NA	NA		48.8737	45.6419	12.5691	17.3386	14.2624	2.13981	1.09748	1.57704e-27	5.70268e-26	up	yes
ENSGALG00000026153	FOXO6	ENSGALT00000042834	GO:0043565(sequence-specific DNA binding);GO:0003700(transcription factor activity, sequence-specific DNA binding);GO:0006355(regulation of transcription, DNA-templated);GO:0006351(transcription, DNA-templated);GO:0005634(nucleus);GO:0003677(DNA binding);GO:0000981(RNA polymerase II transcription factor activity, sequence-specific DNA binding);GO:0006357(regulation of transcription from RNA polym…	NA	NA	NA	forkhead box O6 [Source:HGNC Symbol;Acc:HGNC:24814]	17.5755	12.8627	2.83554	2.72422	1.70342	4.19075	2.06721	2.17072e-27	7.78586e-26	up	yes
ENSGALG00000015531	PPP2R2C	ENSGALT00000065822;ENSGALT00000057276;ENSGALT00000025039;ENSGALT00000054019;ENSGALT00000051998	GO:0000159(protein phosphatase type 2A complex);GO:0000278(mitotic cell cycle);GO:0070262(peptidyl-serine dephosphorylation);GO:0019888(protein phosphatase regulator activity);GO:0004722(protein serine/threonine phosphatase activity);GO:0050790(regulation of catalytic activity);GO:0005829(cytosol);GO:0032502(developmental process);GO:0032502(developmental process)	03015(mRNA surveillance pathway);04530(Tight junction);04261(Adrenergic signaling in cardiomyocytes);04261(Adrenergic signaling in cardiomyocytes)	K04354	NA	protein phosphatase 2 regulatory subunit Bgamma [Source:HGNC Symbol;Acc:HGNC:9306]	11.6263	14.6077	3.91512	3.2721	3.94877	2.35578	1.23621	2.4286e-27	8.68733e-26	up	yes
ENSGALG00000015056		ENSGALT00000024287	GO:0045995(regulation of embryonic development);GO:0030334(regulation of cell migration);GO:0030155(regulation of cell adhesion);GO:0007155(cell adhesion);GO:0005102(receptor binding)	NA	NA	NA		7.18509	6.52472	2.27994	2.0094	2.29327	2.08273	1.05848	2.95709e-27	1.05211e-25	up	yes
ENSGALG00000027742	KLHL33	ENSGALT00000043489	GO:0031463(Cul3-RING ubiquitin ligase complex);GO:0004842(ubiquitin-protein transferase activity);GO:0016567(protein ubiquitination)	NA	NA	NA	kelch like family member 33 [Source:HGNC Symbol;Acc:HGNC:31952]	9.65004	8.51369	0	0.27866	0.147414	42.6305	5.41381	3.78084e-27	1.33801e-25	up	yes
ENSGALG00000009945	CPM	ENSGALT00000016170;ENSGALT00000084246	GO:0004185(serine-type carboxypeptidase activity);GO:0070062(extracellular exosome);GO:0009986(cell surface);GO:0016485(protein processing);GO:0006518(peptide metabolic process);GO:0004181(metallocarboxypeptidase activity);GO:0006508(proteolysis);GO:0005615(extracellular space);GO:0008270(zinc ion binding);GO:0008270(zinc ion binding)	NA	NA	NA	carboxypeptidase M [Source:HGNC Symbol;Acc:HGNC:2311]	20.8231	33.553	6.67021	4.14635	3.68533	3.74959	1.90673	6.94433e-27	2.43161e-25	up	yes
ENSGALG00000004209	ELFN1	ENSGALT00000006695	GO:0070062(extracellular exosome);GO:0060076(excitatory synapse);GO:0030425(dendrite);GO:0050808(synapse organization);GO:0010923(negative regulation of phosphatase activity);GO:0019902(phosphatase binding);GO:0016021(integral component of membrane);GO:0016020(membrane)	NA	NA	NA	extracellular leucine rich repeat and fibronectin type III domain containing 1 [Source:HGNC Symbol;Acc:HGNC:33154]	9.7961	11.3302	1.49761	2.47659	2.06143	3.50027	1.80747	3.60523e-26	1.22995e-24	up	yes
ENSGALG00000005063	ST6GALNAC4	ENSGALT00000008118	GO:0001665(alpha-N-acetylgalactosaminide alpha-2,6-sialyltransferase activity);GO:0009311(oligosaccharide metabolic process);GO:0097503(sialylation);GO:0008373(sialyltransferase activity);GO:0018279(protein N-linked glycosylation via asparagine);GO:0000139(Golgi membrane);GO:0006486(protein glycosylation);GO:0005794(Golgi apparatus);GO:0016757(transferase activity, transferring glycosyl groups);G…	00604(Glycosphingolipid biosynthesis - ganglio series)	K03374	EC:2.4.99.7	ST6 N-acetylgalactosaminide alpha-2,6-sialyltransferase 4 [Source:HGNC Symbol;Acc:HGNC:17846]	32.9762	27.604	10.3424	8.25484	6.82253	2.3832	1.2529	8.23945e-26	2.7543e-24	up	yes
ENSGALG00000040360	DUSP1	ENSGALT00000082972	NA	04010(MAPK signaling pathway)	K21278	EC:3.1.3.16;EC:3.1.3.48	dual specificity phosphatase 1 [Source:HGNC Symbol;Acc:HGNC:3064]	19.6179	17.9179	5.37975	5.61259	6.75708	2.11476	1.0805	1.12774e-25	3.75094e-24	up	yes
ENSGALG00000019157	SMPX	ENSGALT00000030302	GO:0043292(contractile fiber);GO:0043034(costamere);GO:0031430(M band);GO:0005927(muscle tendon junction);GO:0005737(cytoplasm);GO:0005634(nucleus);GO:0006941(striated muscle contraction);GO:0003674(molecular_function)	NA	NA	NA	small muscle protein, X-linked [Source:HGNC Symbol;Acc:HGNC:11122]	22.6827	36.903	4.63732	3.03337	5.08659	4.67072	2.22364	1.3897e-25	4.59917e-24	up	yes
ENSGALG00000000557	ETNK2	ENSGALT00000000773	GO:0035264(multicellular organism growth);GO:0016310(phosphorylation);GO:0009791(post-embryonic development);GO:0006646(phosphatidylethanolamine biosynthetic process);GO:0004305(ethanolamine kinase activity)	00564(Glycerophospholipid metabolism)	K00894	EC:2.7.1.82	ethanolamine kinase 2 [Source:HGNC Symbol;Acc:HGNC:25575]	29.7031	39.9606	9.47752	11.5346	11.0016	2.17606	1.12172	1.658e-25	5.47346e-24	up	yes
ENSGALG00000039977		ENSGALT00000082925;ENSGALT00000087182	NA	04530(Tight junction);04530(Tight junction)	K10352	NA		612.267	651.248	158.178	268.169	179.807	2.08448	1.05969	2.883e-25	9.40055e-24	up	yes
ENSGALG00000008741	PROKR2	ENSGALT00000031979	GO:0008015(blood circulation);GO:0001602(pancreatic polypeptide receptor activity);GO:0007631(feeding behavior);GO:0007268(chemical synaptic transmission);GO:0007218(neuropeptide signaling pathway);GO:0004983(neuropeptide Y receptor activity);GO:0007623(circadian rhythm);GO:0007186(G-protein coupled receptor signaling pathway);GO:0007165(signal transduction);GO:0004930(G-protein coupled receptor …	NA	NA	NA	prokineticin receptor 2 [Source:RefSeq peptide;Acc:NP_001138701]	18.0137	6.32733	0.160769	0	0	151.404	7.24226	3.45287e-25	1.12037e-23	up	yes
ENSGALG00000028091	MYF5	ENSGALT00000044184	GO:0007517(muscle organ development);GO:0006355(regulation of transcription, DNA-templated);GO:0006366(transcription from RNA polymerase II promoter);GO:0046983(protein dimerization activity);GO:0005634(nucleus);GO:0003677(DNA binding);GO:0001228(transcriptional activator activity, RNA polymerase II transcription regulatory region sequence-specific binding);GO:0043565(sequence-specific DNA bindin…	NA	NA	NA	myogenic factor 5 [Source:HGNC Symbol;Acc:HGNC:7565]	62.5267	39.6028	12.4093	14.0145	9.63221	2.83253	1.50209	5.27959e-25	1.6965e-23	up	yes
ENSGALG00000013640		ENSGALT00000022187;ENSGALT00000060778	GO:0043209(myelin sheath);GO:0019911(structural constituent of myelin sheath);GO:0042552(myelination);GO:0007417(central nervous system development);GO:0043025(neuronal cell body);GO:0005886(plasma membrane);GO:0016020(membrane);GO:0033269(internode region of axon);GO:0043218(compact myelin);GO:0071944(cell periphery);GO:0071944(cell periphery)	NA	NA	NA	Myelin basic protein [Source:UniProtKB/Swiss-Prot;Acc:P15720]	19.9015	21.6786	0.571976	0.641598	2.19282	12.2065	3.60958	6.49e-25	2.07539e-23	up	yes
ENSGALG00000003334	METTL11B	ENSGALT00000005276	GO:0006480(N-terminal protein amino acid methylation);GO:0071885(N-terminal protein N-methyltransferase activity);GO:0008168(methyltransferase activity);GO:0005737(cytoplasm)	NA	NA	NA	methyltransferase like 11B [Source:HGNC Symbol;Acc:HGNC:31932]	8.31339	8.08907	0.363662	0.394684	0.475783	13.2907	3.73235	7.88818e-25	2.49843e-23	up	yes
ENSGALG00000013615		ENSGALT00000048865;ENSGALT00000022147;ENSGALT00000053097;ENSGALT00000059978	NA	NA	NA	NA		14.2385	11.8436	3.08563	2.21766	1.31173	3.94287	1.97925	1.00478e-24	3.17486e-23	up	yes
ENSGALG00000004613		ENSGALT00000007345	GO:0098655(cation transmembrane transport);GO:0033198(response to ATP);GO:0035590(purinergic nucleotide receptor signaling pathway);GO:0004931(extracellular ATP-gated cation channel activity);GO:0001614(purinergic nucleotide receptor activity);GO:0005639(integral component of nuclear inner membrane);GO:0060079(excitatory postsynaptic potential);GO:0006811(ion transport);GO:0005216(ion channel act…	04020(Calcium signaling pathway);04080(Neuroactive ligand-receptor interaction)	K05219	NA		79.0915	57.2513	12.6342	23.8212	17.9397	2.50653	1.32569	1.12722e-24	3.54487e-23	up	yes
ENSGALG00000012117	STEAP3	ENSGALT00000081812;ENSGALT00000019790;ENSGALT00000082400	GO:0005737(cytoplasm);GO:0009306(protein secretion);GO:0005771(multivesicular body);GO:0015677(copper ion import);GO:0052851(ferric-chelate reductase (NADPH) activity);GO:0008823(cupric reductase activity);GO:0005768(endosome);GO:0055114(oxidation-reduction process);GO:0005887(integral component of plasma membrane);GO:0016021(integral component of membrane);GO:0016020(membrane);GO:0098706(ferric …	04216(Ferroptosis);04115(p53 signaling pathway);04115(p53 signaling pathway)	K10142	EC:1.16.1.-	STEAP3 metalloreductase [Source:HGNC Symbol;Acc:HGNC:24592]	15.2189	18.2791	3.94095	2.39111	4.55678	3.07636	1.62123	1.26575e-24	3.95243e-23	up	yes
ENSGALG00000004503		ENSGALT00000007174;ENSGALT00000048318;ENSGALT00000052384	GO:0016846(carbon-sulfur lyase activity);GO:0008152(metabolic process);GO:0008152(metabolic process)	NA	NA	NA		44.7635	47.0491	17.4646	12.527	13.099	2.13069	1.09132	3.2899e-24	1.00369e-22	up	yes
ENSGALG00000017274	CD9	ENSGALT00000030043;ENSGALT00000069015	GO:0007166(cell surface receptor signaling pathway);GO:0005887(integral component of plasma membrane);GO:0016021(integral component of membrane);GO:0016020(membrane);GO:0007155(cell adhesion);GO:0007342(fusion of sperm to egg plasma membrane involved in single fertilization);GO:0008285(negative regulation of cell proliferation);GO:0030913(paranodal junction assembly);GO:0031623(receptor internali…	NA	NA	NA	CD9 molecule [Source:HGNC Symbol;Acc:HGNC:1709]	9.03137	8.73723	0.958189	0.93805	0.731788	6.7612	2.75728	5.755e-24	1.73579e-22	up	yes
ENSGALG00000003063	HYKK	ENSGALT00000085440;ENSGALT00000004836	NA	00310(Lysine degradation);00310(Lysine degradation)	K18201	EC:2.7.1.81	hydroxylysine kinase [Source:HGNC Symbol;Acc:HGNC:34403]	18.2857	15.9349	4.45833	4.27473	4.85237	2.51891	1.3328	5.98471e-24	1.7969e-22	up	yes
ENSGALG00000025735	PDE6H	ENSGALT00000043921	GO:0004114(3',5'-cyclic-nucleotide phosphodiesterase activity);GO:0007601(visual perception);GO:0030553(cGMP binding);GO:0000187(activation of MAPK activity);GO:0045742(positive regulation of epidermal growth factor receptor signaling pathway);GO:0045745(positive regulation of G-protein coupled receptor protein signaling pathway)	00230(Purine metabolism)	K13760	NA	phosphodiesterase 6H [Source:HGNC Symbol;Acc:HGNC:8790]	19.2812	21.0412	2.49943	2.64979	2.63273	5.18154	2.37338	7.03131e-24	2.10163e-22	up	yes
ENSGALG00000010718	THSD7A	ENSGALT00000046373;ENSGALT00000017442;ENSGALT00000049563;ENSGALT00000058040	GO:0070062(extracellular exosome);GO:0016021(integral component of membrane);GO:0016020(membrane);GO:0016020(membrane)	NA	NA	NA	thrombospondin type 1 domain containing 7A [Source:HGNC Symbol;Acc:HGNC:22207]	3.87974	5.88864	0.970707	1.12296	0.683608	3.51725	1.81445	1.12195e-23	3.33843e-22	up	yes
ENSGALG00000023819		ENSGALT00000084154;ENSGALT00000039922	NA	NA	NA	NA		30.1175	36.623	4.82969	7.19155	3.21222	4.38118	2.13132	1.21524e-23	3.60793e-22	up	yes
ENSGALG00000042624	CEP85	ENSGALT00000048291	NA	NA	NA	NA	centrosomal protein 85 [Source:HGNC Symbol;Acc:HGNC:25309]	17.5214	14.0717	5.59672	5.34049	4.2104	2.08568	1.06052	1.67248e-23	4.89967e-22	up	yes
ENSGALG00000007716	SLC37A4	ENSGALT00000012507;ENSGALT00000069395	GO:0005623(cell);GO:0006810(transport);GO:0005215(transporter activity);GO:0055085(transmembrane transport);GO:0016021(integral component of membrane);GO:0016020(membrane);GO:0001780(neutrophil homeostasis);GO:0001816(cytokine production);GO:0002318(myeloid progenitor cell differentiation);GO:0005977(glycogen metabolic process);GO:0006089(lactate metabolic process);GO:0006641(triglyceride metabol…	NA	NA	NA	solute carrier family 37 member 4 [Source:HGNC Symbol;Acc:HGNC:4061]	21.3631	24.5272	7.44545	7.86823	6.08261	2.14478	1.10083	3.51952e-23	1.01318e-21	up	yes
ENSGALG00000038250		ENSGALT00000054857	NA	NA	NA	NA		8.53379	8.27157	1.22286	1.38226	1.63949	3.95923	1.98522	4.62698e-23	1.32053e-21	up	yes
ENSGALG00000041708	WNT4	ENSGALT00000080352	GO:0009986(cell surface);GO:0005737(cytoplasm);GO:0005615(extracellular space);GO:0005578(proteinaceous extracellular matrix);GO:2001234(negative regulation of apoptotic signaling pathway);GO:2000225(negative regulation of testosterone biosynthetic process);GO:2000066(positive regulation of cortisol biosynthetic process);GO:2000019(negative regulation of male gonad development);GO:1902811(positiv…	04310(Wnt signaling pathway);04150(mTOR signaling pathway);04916(Melanogenesis)	K00408	NA	Protein Wnt-4 [Source:UniProtKB/Swiss-Prot;Acc:P49337]	11.2243	13.6565	2.0797	2.80545	1.76454	3.74165	1.90367	9.44302e-23	2.63274e-21	up	yes
ENSGALG00000042597		ENSGALT00000072742	NA	NA	NA	NA		43.655	37.6564	7.47487	8.19808	11.2207	3.02344	1.59619	1.1993e-22	3.32274e-21	up	yes
ENSGALG00000030887		ENSGALT00000074745	NA	NA	NA	NA		77.921	66.6489	21.054	16.4757	10.8385	2.98894	1.57963	2.26643e-22	6.18884e-21	up	yes
ENSGALG00000001918	DNAJB5	ENSGALT00000002971;ENSGALT00000052438	GO:0005829(cytosol);GO:0005634(nucleus);GO:0006986(response to unfolded protein);GO:0000122(negative regulation of transcription from RNA polymerase II promoter);GO:0051087(chaperone binding);GO:0051082(unfolded protein binding);GO:0006457(protein folding);GO:0006457(protein folding)	NA	NA	NA	DnaJ heat shock protein family (Hsp40) member B5 [Source:HGNC Symbol;Acc:HGNC:14887]	14.6205	23.2744	4.16095	4.18397	4.67347	2.91087	1.54145	2.70686e-22	7.36123e-21	up	yes
ENSGALG00000036346	AMH	ENSGALT00000068088	GO:0010628(positive regulation of gene expression);GO:0005102(receptor binding);GO:0001880(Mullerian duct regression)	04350(TGF-beta signaling pathway);04060(Cytokine-cytokine receptor interaction)	K04665	NA	anti-Mullerian hormone [Source:HGNC Symbol;Acc:HGNC:464]	6.11451	5.51149	0.381361	0.890981	0.801735	5.60539	2.48681	2.91967e-22	7.90755e-21	up	yes
ENSGALG00000045605		ENSGALT00000085221	NA	NA	NA	NA		5.73548	6.81896	0.205983	0.456105	0.449685	11.2923	3.49726	2.94426e-22	7.9579e-21	up	yes
ENSGALG00000034673	HTRA3	ENSGALT00000077090	GO:0008236(serine-type peptidase activity);GO:0006508(proteolysis);GO:0030514(negative regulation of BMP signaling pathway);GO:0004175(endopeptidase activity);GO:0030512(negative regulation of transforming growth factor beta receptor signaling pathway)	NA	NA	NA	HtrA serine peptidase 3 [Source:HGNC Symbol;Acc:HGNC:30406]	25.1766	20.2017	8.53601	6.40452	6.74626	2.09244	1.06518	4.31946e-22	1.15805e-20	up	yes
ENSGALG00000014912	HSPB3	ENSGALT00000024049	GO:0016607(nuclear speck);GO:0005737(cytoplasm);GO:0005634(nucleus)	NA	NA	NA	heat shock protein family B (small) member 3 [Source:HGNC Symbol;Acc:HGNC:5248]	35.2254	40.9542	6.66549	6.12792	3.07137	4.80181	2.26358	8.57864e-22	2.2724e-20	up	yes
ENSGALG00000038025		ENSGALT00000058710	NA	NA	NA	NA		18.4433	16.6735	4.02294	2.77038	2.95539	3.6022	1.84888	1.26642e-21	3.34128e-20	up	yes
ENSGALG00000003911	CACNG5	ENSGALT00000006226	GO:0032281(AMPA glutamate receptor complex);GO:2000311(regulation of AMPA receptor activity);GO:0070588(calcium ion transmembrane transport);GO:0006816(calcium ion transport);GO:0019226(transmission of nerve impulse);GO:0016247(channel regulator activity);GO:0005262(calcium channel activity);GO:0005245(voltage-gated calcium channel activity);GO:0034765(regulation of ion transmembrane transport);G…	04010(MAPK signaling pathway);04260(Cardiac muscle contraction);04261(Adrenergic signaling in cardiomyocytes)	K04870	NA	calcium voltage-gated channel auxiliary subunit gamma 5 [Source:HGNC Symbol;Acc:HGNC:1409]	53.599	36.5313	2.91127	8.51848	7.60103	4.73602	2.24368	1.405e-21	3.67766e-20	up	yes
ENSGALG00000042148	FKBP5	ENSGALT00000074022	GO:0003755(peptidyl-prolyl cis-trans isomerase activity);GO:0016020(membrane);GO:0061077(chaperone-mediated protein folding);GO:0005654(nucleoplasm);GO:0070062(extracellular exosome);GO:0031072(heat shock protein binding)	NA	NA	NA	peptidyl-prolyl cis-trans isomerase FKBP5 [Source:RefSeq peptide;Acc:NP_001005431]	9.86814	10.2464	2.7264	2.69342	1.97195	2.72121	1.44425	1.66376e-21	4.32859e-20	up	yes
ENSGALG00000034305		ENSGALT00000071020	NA	NA	NA	NA		9.87295	13.3674	0.916468	1.53991	0.609735	7.57973	2.92215	1.66672e-21	4.32859e-20	up	yes
ENSGALG00000014907	DCBLD1	ENSGALT00000024042	GO:0070492(oligosaccharide binding);GO:0016021(integral component of membrane);GO:0016020(membrane)	NA	NA	NA	discoidin, CUB and LCCL domain containing 1 [Source:HGNC Symbol;Acc:HGNC:21479]	17.0632	13.5672	3.90757	5.84206	4.26425	2.18572	1.12811	6.01236e-21	1.49981e-19	up	yes
ENSGALG00000027069	TSC22D3	ENSGALT00000042857	GO:0070236(negative regulation of activation-induced cell death of T cells);GO:0005634(nucleus);GO:0005737(cytoplasm);GO:0003700(transcription factor activity, sequence-specific DNA binding);GO:0006355(regulation of transcription, DNA-templated);GO:0043426(MRF binding);GO:0000122(negative regulation of transcription from RNA polymerase II promoter);GO:0006970(response to osmotic stress);GO:004864…	NA	NA	NA	TSC22 domain family member 3 [Source:HGNC Symbol;Acc:HGNC:3051]	29.5045	29.3237	4.55173	9.25505	5.58816	3.03317	1.60083	8.35357e-21	2.06829e-19	up	yes
ENSGALG00000008040		ENSGALT00000013047	GO:0016627(oxidoreductase activity, acting on the CH-CH group of donors);GO:0055114(oxidation-reduction process)	NA	NA	NA		22.6671	14.9168	5.73073	4.96899	4.44639	2.48142	1.31117	1.66803e-20	4.08422e-19	up	yes
ENSGALG00000015094	ZBTB20	ENSGALT00000024346	GO:0005634(nucleus);GO:0045892(negative regulation of transcription, DNA-templated);GO:0032760(positive regulation of tumor necrosis factor production);GO:0032755(positive regulation of interleukin-6 production);GO:0032728(positive regulation of interferon-beta production);GO:0010629(negative regulation of gene expression);GO:0000122(negative regulation of transcription from RNA polymerase II pro…	NA	NA	NA	zinc finger and BTB domain containing 20 [Source:HGNC Symbol;Acc:HGNC:13503]	12.6215	10.2944	4.129	3.17455	3.49474	2.12218	1.08554	2.42906e-20	5.88249e-19	up	yes
ENSGALG00000008604	TMEM255A	ENSGALT00000014012	GO:0016021(integral component of membrane);GO:0016020(membrane)	NA	NA	NA	transmembrane protein 255A [Source:HGNC Symbol;Acc:HGNC:26086]	37.8026	45.4885	9.54997	15.7968	13.3174	2.15422	1.10716	5.21727e-20	1.24306e-18	up	yes
ENSGALG00000004257	TSPAN15	ENSGALT00000006771;ENSGALT00000080543	GO:0097197(tetraspanin-enriched microdomain);GO:0070062(extracellular exosome);GO:0009986(cell surface);GO:0005886(plasma membrane);GO:0051604(protein maturation);GO:0019899(enzyme binding);GO:0007166(cell surface receptor signaling pathway);GO:0005887(integral component of plasma membrane);GO:0016021(integral component of membrane);GO:0016020(membrane);GO:0072659(protein localization to plasma m…	NA	NA	NA	tetraspanin 15 [Source:HGNC Symbol;Acc:HGNC:23298]	6.17648	5.63983	1.13787	1.07937	1.12771	3.53258	1.82072	6.4425e-20	1.52949e-18	up	yes
ENSGALG00000012018	UGT8	ENSGALT00000019611;ENSGALT00000066293	GO:0048812(neuron projection morphogenesis);GO:0030913(paranodal junction assembly);GO:0007010(cytoskeleton organization);GO:0002175(protein localization to paranode region of axon);GO:0015020(glucuronosyltransferase activity);GO:0016758(transferase activity, transferring hexosyl groups);GO:0043231(intracellular membrane-bounded organelle);GO:0016757(transferase activity, transferring glycosyl gr…	00565(Ether lipid metabolism);00600(Sphingolipid metabolism);00600(Sphingolipid metabolism)	K04628	EC:2.4.1.47	2-hydroxyacylsphingosine 1-beta-galactosyltransferase precursor [Source:RefSeq peptide;Acc:NP_989535]	6.90791	6.97732	0.636402	1.25255	0.625246	5.52273	2.46538	7.02964e-20	1.6659e-18	up	yes
ENSGALG00000002335	DOCK3	ENSGALT00000059778;ENSGALT00000003678	GO:0005829(cytosol);GO:0005085(guanyl-nucleotide exchange factor activity);GO:0007264(small GTPase mediated signal transduction);GO:0005622(intracellular);GO:0065009(regulation of molecular function);GO:0065009(regulation of molecular function)	NA	NA	NA	dedicator of cytokinesis 3 [Source:HGNC Symbol;Acc:HGNC:2989]	3.63461	4.27492	1.05628	1.36662	0.957429	2.33987	1.22643	8.75817e-20	2.06081e-18	up	yes
ENSGALG00000005077	F8	ENSGALT00000063990;ENSGALT00000032408	GO:0030168(platelet activation);GO:0016491(oxidoreductase activity);GO:0046872(metal ion binding);GO:0055114(oxidation-reduction process);GO:0005507(copper ion binding);GO:0005507(copper ion binding)	NA	NA	NA	coagulation factor VIII [Source:HGNC Symbol;Acc:HGNC:3546]	0.802195	0.836954	0.127524	0.10814	0.092313	4.99776	2.32128	1.13691e-19	2.65633e-18	up	yes
ENSGALG00000033597	ADAMTS13	ENSGALT00000072565;ENSGALT00000080807	GO:0006508(proteolysis);GO:0005615(extracellular space);GO:0043171(peptide catabolic process);GO:0004175(endopeptidase activity);GO:0004175(endopeptidase activity)	NA	NA	NA	ADAM metallopeptidase with thrombospondin type 1 motif 13 [Source:HGNC Symbol;Acc:HGNC:1366]	4.84815	6.12242	1.70048	1.20096	1.70077	2.38376	1.25324	1.65195e-19	3.83269e-18	up	yes
ENSGALG00000026572	RGS5	ENSGALT00000045569	GO:0005096(GTPase activator activity);GO:0043547(positive regulation of GTPase activity);GO:0005737(cytoplasm);GO:0005886(plasma membrane);GO:0005829(cytosol)	NA	NA	NA	regulator of G protein signaling 5 [Source:HGNC Symbol;Acc:HGNC:10001]	19.7953	16.8715	5.09692	5.32093	3.16778	2.69894	1.43239	3.26092e-19	7.48713e-18	up	yes
ENSGALG00000019489	CHST9	ENSGALT00000030920;ENSGALT00000054661	GO:0006790(sulfur compound metabolic process);GO:0001537(N-acetylgalactosamine 4-O-sulfotransferase activity);GO:0005975(carbohydrate metabolic process);GO:0016051(carbohydrate biosynthetic process);GO:0008146(sulfotransferase activity);GO:0005794(Golgi apparatus);GO:0000139(Golgi membrane);GO:0016740(transferase activity);GO:0016021(integral component of membrane);GO:0016021(integral component o…	NA	NA	NA	carbohydrate sulfotransferase 9 [Source:HGNC Symbol;Acc:HGNC:19898]	5.38541	5.57698	0.754327	0.717181	1.08362	4.29035	2.1011	3.4262e-19	7.826e-18	up	yes
ENSGALG00000002452	AQP3	ENSGALT00000003868	GO:0016323(basolateral plasma membrane);GO:0005911(cell-cell junction);GO:0005886(plasma membrane);GO:0005737(cytoplasm);GO:0005634(nucleus);GO:0070295(renal water absorption);GO:0032526(response to retinoic acid);GO:0015840(urea transport);GO:0015793(glycerol transport);GO:0006833(water transport);GO:0002684(positive regulation of immune system process);GO:0015254(glycerol channel activity);GO:0…	NA	NA	NA	aquaporin 3 (Gill blood group) [Source:HGNC Symbol;Acc:HGNC:636]	10.0785	10.3876	1.64245	1.1555	0.891865	5.54664	2.47161	3.46793e-19	7.9077e-18	up	yes
ENSGALG00000039939		ENSGALT00000072927	NA	NA	NA	NA		15.0743	13.926	4.97596	4.53911	4.36035	2.09005	1.06354	3.71962e-19	8.43812e-18	up	yes
ENSGALG00000028710	FAM180B	ENSGALT00000046151	NA	NA	NA	NA	family with sequence similarity 180 member B [Source:HGNC Symbol;Acc:HGNC:34451]	17.6137	15.4293	4.33106	6.01492	5.5258	2.08187	1.05788	4.39696e-19	9.89017e-18	up	yes
ENSGALG00000032304		ENSGALT00000074248	NA	NA	NA	NA		30.7127	36.2855	8.8962	3.96292	9.57388	2.98659	1.5785	5.53016e-19	1.23139e-17	up	yes
ENSGALG00000026858	BTG2	ENSGALT00000042662	GO:0008285(negative regulation of cell proliferation);GO:0006479(protein methylation);GO:0006974(cellular response to DNA damage stimulus);GO:0008306(associative learning);GO:0009952(anterior/posterior pattern specification);GO:0017148(negative regulation of translation);GO:0021542(dentate gyrus development);GO:0021954(central nervous system neuron development);GO:0031175(neuron projection develo…	03018(RNA degradation)	K14443	NA	BTG anti-proliferation factor 2 [Source:HGNC Symbol;Acc:HGNC:1131]	106.02	74.735	21.7152	35.5049	27.7621	2.12698	1.0888	6.87405e-19	1.5179e-17	up	yes
ENSGALG00000006413	CEMIP	ENSGALT00000010352	GO:0045334(clathrin-coated endocytic vesicle);GO:0030665(clathrin-coated vesicle membrane);GO:0005886(plasma membrane);GO:0005783(endoplasmic reticulum);GO:0005737(cytoplasm);GO:1900020(positive regulation of protein kinase C activity);GO:0090314(positive regulation of protein targeting to membrane);GO:0051281(positive regulation of release of sequestered calcium ion into cytosol);GO:0030335(posi…	NA	NA	NA	cell migration inducing hyaluronan binding protein [Source:HGNC Symbol;Acc:HGNC:29213]	3.16348	3.17385	0.760721	0.589282	0.45619	3.50867	1.81092	8.8037e-19	1.93114e-17	up	yes
ENSGALG00000011635	TFCP2L1	ENSGALT00000029195	GO:0016020(membrane);GO:0005739(mitochondrion);GO:0005634(nucleus);GO:0005737(cytoplasm);GO:0001650(fibrillar center);GO:0045927(positive regulation of growth);GO:0008340(determination of adult lifespan);GO:0007431(salivary gland development);GO:0007028(cytoplasm organization);GO:0002070(epithelial cell maturation);GO:0000902(cell morphogenesis);GO:0000122(negative regulation of transcription fro…	NA	NA	NA	transcription factor CP2 like 1 [Source:HGNC Symbol;Acc:HGNC:17925]	11.9465	9.46332	1.09377	1.93247	0.647599	5.82763	2.54291	9.22157e-19	2.01614e-17	up	yes
ENSGALG00000009042	ISM1	ENSGALT00000014720	NA	NA	NA	NA	isthmin 1 [Source:HGNC Symbol;Acc:HGNC:16213]	9.96115	19.2626	3.20525	2.77357	1.73068	3.79062	1.92243	9.69015e-19	2.1151e-17	up	yes
ENSGALG00000007409	SCN4B	ENSGALT00000011985	GO:0031226(intrinsic component of plasma membrane);GO:0014704(intercalated disc);GO:0001518(voltage-gated sodium channel complex);GO:2000649(regulation of sodium ion transmembrane transporter activity);GO:0086091(regulation of heart rate by cardiac conduction);GO:0086016(AV node cell action potential);GO:0086012(membrane depolarization during cardiac muscle cell action potential);GO:0086002(cardi…	04261(Adrenergic signaling in cardiomyocytes)	K04848	NA	sodium voltage-gated channel beta subunit 4 [Source:HGNC Symbol;Acc:HGNC:10592]	21.6238	27.4287	4.86858	6.70175	4.85822	2.98581	1.57812	1.33239e-18	2.87983e-17	up	yes
ENSGALG00000045469	BCAN	ENSGALT00000089881	NA	NA	NA	NA	brevican [Source:HGNC Symbol;Acc:HGNC:23059]	6.02577	7.48241	1.0394	1.18629	1.94875	3.23593	1.69418	1.8188e-18	3.91839e-17	up	yes
ENSGALG00000014759	STYK1	ENSGALT00000023808	GO:0005886(plasma membrane);GO:0006935(chemotaxis);GO:0043304(regulation of mast cell degranulation);GO:0007173(epidermal growth factor receptor signaling pathway);GO:0007155(cell adhesion);GO:0031234(extrinsic component of cytoplasmic side of plasma membrane);GO:0042127(regulation of cell proliferation);GO:0038083(peptidyl-tyrosine autophosphorylation);GO:0030154(cell differentiation);GO:0004715…	NA	NA	NA	serine/threonine/tyrosine kinase 1 [Source:HGNC Symbol;Acc:HGNC:18889]	5.82978	22.5378	0.87791	1.09495	0.535484	11.3093	3.49943	1.88335e-18	4.04433e-17	up	yes
ENSGALG00000044836		ENSGALT00000085994	NA	NA	NA	NA		63.7319	65.6758	20.2634	20.867	15.4576	2.28684	1.19336	2.19242e-18	4.67775e-17	up	yes
ENSGALG00000037812		ENSGALT00000047369	NA	NA	NA	NA		12.2404	7.2717	1.74703	2.22617	1.52812	3.5468	1.82652	2.73618e-18	5.79137e-17	up	yes
ENSGALG00000041031		ENSGALT00000090061;ENSGALT00000079477	NA	NA	NA	NA		59.1121	30.0885	6.77625	1.47947	4.27638	7.11777	2.83142	2.94783e-18	6.21951e-17	up	yes
ENSGALG00000017246	ME3	ENSGALT00000027880	GO:0005739(mitochondrion);GO:0055114(oxidation-reduction process);GO:0006108(malate metabolic process);GO:0006090(pyruvate metabolic process);GO:0051287(NAD binding);GO:0004473(malate dehydrogenase (decarboxylating) (NADP+) activity);GO:0004471(malate dehydrogenase (decarboxylating) (NAD+) activity);GO:0004470(malic enzyme activity);GO:0046872(metal ion binding);GO:0016491(oxidoreductase activity)	01200(Carbon metabolism);00620(Pyruvate metabolism)	K00029	EC:1.1.1.40	malic enzyme 3 [Source:HGNC Symbol;Acc:HGNC:6985]	30.2885	30.105	13.5061	6.40255	8.80413	2.10337	1.0727	4.74989e-18	9.89574e-17	up	yes
ENSGALG00000005814		ENSGALT00000009335	GO:0004553(hydrolase activity, hydrolyzing O-glycosyl compounds);GO:0005975(carbohydrate metabolic process);GO:0016798(hydrolase activity, acting on glycosyl bonds);GO:0016787(hydrolase activity);GO:0008152(metabolic process);GO:0016021(integral component of membrane);GO:0016020(membrane)	NA	NA	NA		18.9892	17.3961	5.55453	4.55664	7.94127	2.01554	1.01117	5.19994e-18	1.07994e-16	up	yes
ENSGALG00000033461		ENSGALT00000062046;ENSGALT00000067175	GO:0035498(carnosine metabolic process);GO:0007420(brain development);GO:0046539(histamine N-methyltransferase activity);GO:0008170(N-methyltransferase activity);GO:0043005(neuron projection);GO:0032259(methylation);GO:0030735(carnosine N-methyltransferase activity);GO:0008168(methyltransferase activity);GO:0016740(transferase activity);GO:0016740(transferase activity)	NA	NA	NA	Carnosine N-methyltransferase 2 [Source:UniProtKB/Swiss-Prot;Acc:U3NEE3]	8.95227	6.87795	1.15681	0.913527	1.1231	4.95712	2.3095	5.43472e-18	1.12168e-16	up	yes
ENSGALG00000036840		ENSGALT00000081842;ENSGALT00000089186	NA	NA	NA	NA		16.2829	12.7975	4.30608	5.12902	4.78303	2.04531	1.03232	5.9885e-18	1.23024e-16	up	yes
ENSGALG00000043829	EXTL1	ENSGALT00000053717	NA	00534(Glycosaminoglycan biosynthesis - heparan sulfate / heparin)	K02366	EC:2.4.1.224;EC:2.4.1.225	exostosin like glycosyltransferase 1 [Source:HGNC Symbol;Acc:HGNC:3515]	7.86293	8.72886	0.615272	0.940137	1.83362	4.89573	2.29153	6.63523e-18	1.3568e-16	up	yes
ENSGALG00000032831		ENSGALT00000083115	NA	NA	NA	NA		7.90129	7.06805	1.53032	1.26875	1.64924	3.36518	1.75068	7.72421e-18	1.57221e-16	up	yes
ENSGALG00000031737		ENSGALT00000065611;ENSGALT00000059347;ENSGALT00000079730;ENSGALT00000078832;ENSGALT00000070867;ENSGALT00000060390	NA	NA	NA	NA		0.773651	0.709704	0.0918733	0.0455333	0.0268589	9.03023	3.17476	1.1952e-17	2.39599e-16	up	yes
ENSGALG00000035729		ENSGALT00000055733	NA	NA	NA	NA		42.6031	27.1024	10.4375	4.86727	8.67534	2.90681	1.53944	1.33484e-17	2.65587e-16	up	yes
ENSGALG00000004332	PLA2G12B	ENSGALT00000006906	GO:0050482(arachidonic acid secretion);GO:0006644(phospholipid metabolic process);GO:0004623(phospholipase A2 activity);GO:0016042(lipid catabolic process);GO:0005576(extracellular region);GO:0005509(calcium ion binding)	00564(Glycerophospholipid metabolism);00565(Ether lipid metabolism);00590(Arachidonic acid metabolism);00591(Linoleic acid metabolism);00592(alpha-Linolenic acid metabolism);04270(Vascular smooth muscle contraction)	K01047	EC:3.1.1.4	phospholipase A2 group XIIB [Source:HGNC Symbol;Acc:HGNC:18555]	10.9685	8.02169	1.86743	2.14644	0.825299	3.92426	1.97242	1.94723e-17	3.82274e-16	up	yes
ENSGALG00000030247	TMOD4	ENSGALT00000059548;ENSGALT00000066225	GO:0005865(striated muscle thin filament);GO:0051694(pointed-end actin filament capping);GO:0051015(actin filament binding);GO:0005523(tropomyosin binding);GO:0016020(membrane);GO:0005623(cell);GO:0005623(cell)	NA	NA	NA	tropomodulin 4 [Source:HGNC Symbol;Acc:HGNC:11874]	6.38218	9.25136	0.727497	1.40736	1.0124	4.96736	2.31248	3.20768e-17	6.18738e-16	up	yes
ENSGALG00000001273	C2CD4C	ENSGALT00000001942	GO:0005544(calcium-dependent phospholipid binding);GO:0005509(calcium ion binding);GO:0005886(plasma membrane)	NA	NA	NA	C2 calcium dependent domain containing 4C [Source:HGNC Symbol;Acc:HGNC:29417]	2.77099	2.80122	0	0	0.135726	41.0549	5.35948	3.60139e-17	6.88675e-16	up	yes
ENSGALG00000031754	KCNG2	ENSGALT00000080410	GO:0070062(extracellular exosome);GO:0016021(integral component of membrane);GO:0071805(potassium ion transmembrane transport);GO:0051260(protein homooligomerization);GO:0005249(voltage-gated potassium channel activity);GO:0034765(regulation of ion transmembrane transport);GO:0005244(voltage-gated ion channel activity);GO:0008076(voltage-gated potassium channel complex);GO:0006813(potassium ion t…	NA	NA	NA	Potassium voltage-gated channel subfamily G member 2 [Source:UniProtKB/Swiss-Prot;Acc:O73606]	16.5884	20.4301	5.84822	6.87232	3.77258	2.24448	1.16638	3.72748e-17	7.10738e-16	up	yes
ENSGALG00000035673	ADAM11	ENSGALT00000065739	NA	NA	NA	NA	ADAM metallopeptidase domain 11 [Source:HGNC Symbol;Acc:HGNC:189]	5.29968	4.77536	0.98597	0.861378	0.526775	4.24369	2.08532	4.31776e-17	8.16253e-16	up	yes
ENSGALG00000041372		ENSGALT00000070143;ENSGALT00000081581;ENSGALT00000067315;ENSGALT00000082076	NA	NA	NA	NA		4.10311	4.61641	0.743721	0.8198	0.418929	4.39836	2.13696	4.36732e-17	8.24447e-16	up	yes
ENSGALG00000031220		ENSGALT00000069460	NA	NA	NA	NA		9.59266	9.77481	2.05294	2.21586	1.92998	3.1244	1.64358	4.83898e-17	9.10894e-16	up	yes
ENSGALG00000038974		ENSGALT00000046940	NA	NA	NA	NA		8.71808	11.1403	1.55286	1.7036	1.94117	3.82066	1.93382	5.24145e-17	9.85259e-16	up	yes
ENSGALG00000014742	HTR1A	ENSGALT00000023773	GO:0050795(regulation of behavior);GO:0005887(integral component of plasma membrane);GO:0046883(regulation of hormone secretion);GO:0042428(serotonin metabolic process);GO:0042310(vasoconstriction);GO:0042053(regulation of dopamine metabolic process);GO:0035640(exploration behavior);GO:0014062(regulation of serotonin secretion);GO:0008283(cell proliferation);GO:0007210(serotonin receptor signalin…	04080(Neuroactive ligand-receptor interaction)	K04153	NA	5-hydroxytryptamine receptor 1A [Source:HGNC Symbol;Acc:HGNC:5286]	1.9885	1.67709	0.031341	0	0.063769	38.5406	5.26831	7.07977e-17	1.3104e-15	up	yes
ENSGALG00000040182	GAMT	ENSGALT00000089852;ENSGALT00000071548	GO:0070062(extracellular exosome);GO:0009887(animal organ morphogenesis);GO:0007283(spermatogenesis);GO:0030731(guanidinoacetate N-methyltransferase activity);GO:0006601(creatine biosynthetic process);GO:0040014(regulation of multicellular organism growth);GO:0040014(regulation of multicellular organism growth)	00260(Glycine, serine and threonine metabolism);00330(Arginine and proline metabolism);00330(Arginine and proline metabolism)	K00542	EC:2.1.1.2	guanidinoacetate N-methyltransferase [Source:HGNC Symbol;Acc:HGNC:4136]	92.1447	82.8309	19.2773	31.9051	11.5685	2.78841	1.47944	8.20564e-17	1.51036e-15	up	yes
ENSGALG00000003283	COMP	ENSGALT00000005192	GO:0070062(extracellular exosome);GO:0031012(extracellular matrix);GO:0005615(extracellular space);GO:0060173(limb development);GO:0043066(negative regulation of apoptotic process);GO:0003417(growth plate cartilage development);GO:0043395(heparan sulfate proteoglycan binding);GO:0008201(heparin binding);GO:0005518(collagen binding);GO:0005509(calcium ion binding);GO:0002020(protease binding);GO:0…	04512(ECM-receptor interaction);04145(Phagosome);04510(Focal adhesion)	K04659	NA	cartilage oligomeric matrix protein [Source:HGNC Symbol;Acc:HGNC:2227]	8.24896	10.3406	3.44969	3.14581	2.39355	2.06802	1.04825	9.7941e-17	1.79032e-15	up	yes
ENSGALG00000015977	SMOX	ENSGALT00000025747	GO:0043231(intracellular membrane-bounded organelle);GO:0031965(nuclear membrane);GO:0005654(nucleoplasm);GO:0046208(spermine catabolic process);GO:0006598(polyamine catabolic process);GO:0046592(polyamine oxidase activity);GO:0016491(oxidoreductase activity);GO:0055114(oxidation-reduction process)	00330(Arginine and proline metabolism);00410(beta-Alanine metabolism)	K12259	EC:1.5.3.16;EC:1.5.3.-	spermine oxidase [Source:HGNC Symbol;Acc:HGNC:15862]	10.0661	7.66505	2.77419	2.97498	2.47649	2.15559	1.10809	1.07172e-16	1.95636e-15	up	yes
ENSGALG00000023772	HSPB7	ENSGALT00000039811	GO:0016235(aggresome);GO:0015629(actin cytoskeleton);GO:0005739(mitochondrion);GO:0005737(cytoplasm);GO:0005654(nucleoplasm);GO:0005634(nucleus);GO:0031005(filamin binding)	NA	NA	NA	heat shock protein family B (small) member 7 [Source:HGNC Symbol;Acc:HGNC:5249]	5.57877	5.51367	0.782122	0.56627	0.618466	5.63968	2.49561	1.48809e-16	2.70527e-15	up	yes
ENSGALG00000016925	TBC1D4	ENSGALT00000056657;ENSGALT00000027361;ENSGALT00000048855;ENSGALT00000081648	GO:0012505(endomembrane system);GO:0090630(activation of GTPase activity);GO:0031338(regulation of vesicle fusion);GO:0017137(Rab GTPase binding);GO:0005096(GTPase activator activity);GO:0006886(intracellular protein transport);GO:0005622(intracellular);GO:0016192(vesicle-mediated transport);GO:0005829(cytosol);GO:0070062(extracellular exosome);GO:0032869(cellular response to insulin stimulus);GO…	NA	NA	NA	TBC1 domain family member 4 [Source:HGNC Symbol;Acc:HGNC:19165]	33.0892	55.8484	20.2275	10.7765	13.2391	2.0102	1.00734	1.67978e-16	3.0454e-15	up	yes
ENSGALG00000016558	VEGFD	ENSGALT00000089870;ENSGALT00000084541;ENSGALT00000059641;ENSGALT00000026720;ENSGALT00000087577	GO:0005161(platelet-derived growth factor receptor binding);GO:0060754(positive regulation of mast cell chemotaxis);GO:0050930(induction of positive chemotaxis);GO:0048010(vascular endothelial growth factor receptor signaling pathway);GO:0045766(positive regulation of angiogenesis);GO:0001938(positive regulation of endothelial cell proliferation);GO:0001666(response to hypoxia);GO:0043185(vascula…	04060(Cytokine-cytokine receptor interaction);04510(Focal adhesion);04933(AGE-RAGE signaling pathway in diabetic complications);04933(AGE-RAGE signaling pathway in diabetic complications)	K05449	NA	vascular endothelial growth factor D [Source:HGNC Symbol;Acc:HGNC:3708]	3.85094	3.46771	0.353231	0.642754	0.276843	5.74991	2.52354	1.91837e-16	3.46377e-15	up	yes
ENSGALG00000029606		ENSGALT00000070926;ENSGALT00000054979	NA	04530(Tight junction);04530(Tight junction)	K10352	NA		87.6024	41.5255	16.9981	25.152	18.5233	2.12824	1.08966	2.13237e-16	3.83451e-15	up	yes
ENSGALG00000036117	FAM46B	ENSGALT00000076208	NA	NA	NA	NA	family with sequence similarity 46 member B [Source:HGNC Symbol;Acc:HGNC:28273]	26.3909	34.3353	7.95759	12.8679	7.45755	2.14709	1.10238	2.51053e-16	4.48415e-15	up	yes
ENSGALG00000010364		ENSGALT00000016884	GO:0009056(catabolic process);GO:0052689(carboxylic ester hydrolase activity);GO:0016787(hydrolase activity);GO:0008152(metabolic process);GO:0016021(integral component of membrane)	NA	NA	NA		4.95695	10.5877	1.0934	0.416564	0.354638	8.33671	3.05948	3.37261e-16	5.97569e-15	up	yes
ENSGALG00000002597	MSS51	ENSGALT00000004086	GO:0035176(social behavior)	NA	NA	NA	MSS51 mitochondrial translational activator [Source:HGNC Symbol;Acc:HGNC:21000]	5.05047	7.62929	0.117439	0.119882	0.582546	15.4656	3.95099	3.94853e-16	6.98679e-15	up	yes
ENSGALG00000025921		ENSGALT00000045633	GO:0004553(hydrolase activity, hydrolyzing O-glycosyl compounds);GO:0005975(carbohydrate metabolic process);GO:0016798(hydrolase activity, acting on glycosyl bonds);GO:0016787(hydrolase activity);GO:0008152(metabolic process);GO:0016021(integral component of membrane);GO:0016020(membrane)	NA	NA	NA		7.7118	5.11846	0.99273	1.24543	1.68114	3.27362	1.71089	4.57936e-16	8.02809e-15	up	yes
ENSGALG00000032910		ENSGALT00000048200	NA	NA	NA	NA		29.3726	23.6795	2.57955	1.99635	4.9264	5.58307	2.48106	1.21831e-15	2.07551e-14	up	yes
ENSGALG00000001311		ENSGALT00000001996	GO:0005096(GTPase activator activity);GO:0043547(positive regulation of GTPase activity);GO:0005737(cytoplasm);GO:0007165(signal transduction)	NA	NA	NA		5.92976	3.30258	0.61304	0.822261	0.26461	5.43107	2.44124	1.97713e-15	3.3046e-14	up	yes
ENSGALG00000041043	ABRA	ENSGALT00000047178	GO:0045944(positive regulation of transcription from RNA polymerase II promoter);GO:0005886(plasma membrane);GO:0045893(positive regulation of transcription, DNA-templated);GO:0030016(myofibril);GO:0003779(actin binding);GO:0000060(protein import into nucleus, translocation);GO:0035025(positive regulation of Rho protein signal transduction);GO:0051091(positive regulation of sequence-specific DNA …	NA	NA	NA	actin binding Rho activating protein [Source:HGNC Symbol;Acc:HGNC:30655]	14.6163	13.1765	3.20705	4.35931	4.40601	2.32141	1.215	2.19854e-15	3.65625e-14	up	yes
ENSGALG00000037671		ENSGALT00000067177;ENSGALT00000086437;ENSGALT00000085557	NA	NA	NA	NA		11.5354	11.3517	3.56804	2.02333	4.25735	2.32387	1.21653	2.37512e-15	3.91556e-14	up	yes
ENSGALG00000030886		ENSGALT00000053882;ENSGALT00000078998	GO:0001516(prostaglandin biosynthetic process);GO:0004667(prostaglandin-D synthase activity);GO:0005576(extracellular region);GO:0005501(retinoid binding);GO:0045187(regulation of circadian sleep/wake cycle, sleep);GO:2000255(negative regulation of male germ cell proliferation);GO:2000255(negative regulation of male germ cell proliferation)	00590(Arachidonic acid metabolism);00590(Arachidonic acid metabolism)	K01830	EC:5.3.99.2		19.1379	11.42	2.30361	3.65517	1.91972	3.87863	1.95555	3.05759e-15	4.97881e-14	up	yes
ENSGALG00000039652	ARHGEF37	ENSGALT00000068368;ENSGALT00000051230	NA	NA	NA	NA	Rho guanine nucleotide exchange factor 37 [Source:HGNC Symbol;Acc:HGNC:34430]	5.83453	7.32132	2.09944	1.96269	1.05838	2.56925	1.36134	4.91167e-15	7.88184e-14	up	yes
ENSGALG00000006776	KLHDC8B	ENSGALT00000010963	GO:0005829(cytosol);GO:0031463(Cul3-RING ubiquitin ligase complex);GO:0004842(ubiquitin-protein transferase activity);GO:0016567(protein ubiquitination)	NA	NA	NA	kelch domain containing 8B [Source:HGNC Symbol;Acc:HGNC:28557]	2.71388	2.89999	0.247678	0.3253	0.210748	7.16305	2.84057	4.9699e-15	7.96565e-14	up	yes
ENSGALG00000013149	MOCOS	ENSGALT00000021464	GO:0043545(molybdopterin cofactor metabolic process);GO:0102867(molybdenum cofactor sulfurtransferase activity);GO:0030151(molybdenum ion binding);GO:0008265(Mo-molybdopterin cofactor sulfurase activity);GO:0030170(pyridoxal phosphate binding);GO:0016829(lyase activity);GO:0006777(Mo-molybdopterin cofactor biosynthetic process);GO:0003824(catalytic activity);GO:0016740(transferase activity)	NA	NA	NA	molybdenum cofactor sulfurase [Source:HGNC Symbol;Acc:HGNC:18234]	5.7442	5.41769	1.67153	1.44105	1.12545	2.63374	1.39711	5.53267e-15	8.85695e-14	up	yes
ENSGALG00000042619		ENSGALT00000048903	NA	NA	NA	NA		28.7056	13.453	2.72887	0.848287	3.42344	6.02215	2.59028	6.80486e-15	1.08282e-13	up	yes
ENSGALG00000009596	TMEM117	ENSGALT00000015636	GO:0005783(endoplasmic reticulum);GO:0016021(integral component of membrane);GO:0016020(membrane);GO:0070059(intrinsic apoptotic signaling pathway in response to endoplasmic reticulum stress);GO:0005886(plasma membrane)	NA	NA	NA	transmembrane protein 117 [Source:HGNC Symbol;Acc:HGNC:25308]	11.9087	13.3747	3.84256	2.8252	4.12397	2.34285	1.22826	8.24381e-15	1.29933e-13	up	yes
ENSGALG00000016867	ITGBL1	ENSGALT00000073274;ENSGALT00000027247	GO:0005615(extracellular space);GO:0005615(extracellular space)	NA	NA	NA	integrin subunit beta like 1 [Source:HGNC Symbol;Acc:HGNC:6164]	5.71528	4.8783	0.416533	0.0771501	0.52398	10.4097	3.37986	9.25988e-15	1.4543e-13	up	yes
ENSGALG00000032746	Enpp2	ENSGALT00000080987;ENSGALT00000077842	GO:0030901(midbrain development);GO:0005576(extracellular region);GO:0030900(forebrain development);GO:0021536(diencephalon development);GO:0047391(alkylglycerophosphoethanolamine phosphodiesterase activity);GO:0004622(lysophospholipase activity);GO:0004551(nucleotide diphosphatase activity);GO:0004528(phosphodiesterase I activity);GO:0090305(nucleic acid phosphodiester bond hydrolysis);GO:003024…	00565(Ether lipid metabolism);00565(Ether lipid metabolism)	K01122	EC:3.1.4.39	ectonucleotide pyrophosphatase/phosphodiesterase 2 [Source:HGNC Symbol;Acc:HGNC:3357]	7.10017	7.00467	3.1372	2.28573	1.58601	2.01241	1.00892	1.10259e-14	1.72146e-13	up	yes
ENSGALG00000015008	ZNF366	ENSGALT00000024201	GO:0005634(nucleus);GO:0043627(response to estrogen);GO:0033147(negative regulation of intracellular estrogen receptor signaling pathway);GO:0000122(negative regulation of transcription from RNA polymerase II promoter);GO:0030331(estrogen receptor binding);GO:0003714(transcription corepressor activity);GO:0003676(nucleic acid binding)	NA	NA	NA	zinc finger protein 366 [Source:HGNC Symbol;Acc:HGNC:18316]	1.17604	1.07781	0	0	0.057834	38.971	5.28433	1.15447e-14	1.79824e-13	up	yes
ENSGALG00000014681	PCSK1	ENSGALT00000058372;ENSGALT00000023658	GO:0005615(extracellular space);GO:0043043(peptide biosynthetic process);GO:0016485(protein processing);GO:0016486(peptide hormone processing);GO:0004252(serine-type endopeptidase activity);GO:0004175(endopeptidase activity);GO:0006508(proteolysis);GO:0008236(serine-type peptidase activity);GO:0016787(hydrolase activity);GO:0008233(peptidase activity);GO:0042802(identical protein binding);GO:0042…	NA	NA	NA	proprotein convertase subtilisin/kexin type 1 [Source:HGNC Symbol;Acc:HGNC:8743]	3.25522	4.4168	0.393307	0.28042	0.823578	5.12388	2.35724	1.60766e-14	2.48662e-13	up	yes
ENSGALG00000012595	AGTPBP1	ENSGALT00000020569	GO:0004181(metallocarboxypeptidase activity);GO:0006508(proteolysis);GO:0008270(zinc ion binding);GO:0015631(tubulin binding);GO:0001754(eye photoreceptor cell differentiation);GO:0007005(mitochondrion organization);GO:0007628(adult walking behavior);GO:0021549(cerebellum development);GO:0021680(cerebellar Purkinje cell layer development);GO:0021702(cerebellar Purkinje cell differentiation);GO:00…	NA	NA	NA	ATP/GTP binding protein 1 [Source:HGNC Symbol;Acc:HGNC:17258]	4.81173	4.384	1.10654	1.07088	2.01606	2.19286	1.13281	1.79201e-14	2.76532e-13	up	yes
ENSGALG00000021171		ENSGALT00000081024;ENSGALT00000034089;ENSGALT00000049844	NA	NA	NA	NA		5.88523	4.57037	1.40489	2.16266	1.42351	2.09487	1.06686	1.86583e-14	2.86905e-13	up	yes
ENSGALG00000012683	RNF144B	ENSGALT00000020693	GO:0031966(mitochondrial membrane);GO:0005737(cytoplasm);GO:0000151(ubiquitin ligase complex);GO:0042787(protein ubiquitination involved in ubiquitin-dependent protein catabolic process);GO:0032436(positive regulation of proteasomal ubiquitin-dependent protein catabolic process);GO:0000209(protein polyubiquitination);GO:0031624(ubiquitin conjugating enzyme binding);GO:0004842(ubiquitin-protein tr…	NA	NA	NA	ring finger protein 144B [Source:HGNC Symbol;Acc:HGNC:21578]	13.5591	10.3752	2.38355	3.04267	3.23012	2.76495	1.46725	1.93067e-14	2.96208e-13	up	yes
ENSGALG00000038313	EFHD2	ENSGALT00000079686	GO:0045296(cadherin binding)	NA	NA	NA	EF-hand domain family member D2 [Source:HGNC Symbol;Acc:HGNC:28670]	7.63892	9.39931	1.91239	2.20244	1.91587	2.82525	1.49838	1.98898e-14	3.04099e-13	up	yes
ENSGALG00000039154		ENSGALT00000073646	NA	NA	NA	NA		19.0782	22.3688	4.8843	6.4871	4.31157	2.6428	1.40207	2.00314e-14	3.05911e-13	up	yes
ENSGALG00000042812	NRG3	ENSGALT00000077075;ENSGALT00000068558;ENSGALT00000064909	GO:0007389(pattern specification process);GO:0045499(chemorepellent activity);GO:0035556(intracellular signal transduction);GO:0030879(mammary gland development);GO:0060596(mammary placode formation);GO:2001223(negative regulation of neuron migration);GO:0021842(chemorepulsion involved in interneuron migration from the subpallium to the cortex);GO:0021842(chemorepulsion involved in interneuron mi…	NA	NA	NA	neuregulin 3 [Source:HGNC Symbol;Acc:HGNC:7999]	9.47267	7.89714	2.09506	2.26309	2.65322	2.47738	1.30881	2.67986e-14	4.05305e-13	up	yes
ENSGALG00000040927		ENSGALT00000046868	NA	NA	NA	NA		92.3053	41.6689	10.7994	22.3888	12.9231	2.90545	1.53876	3.57847e-14	5.35399e-13	up	yes
ENSGALG00000006421	SLC16A12	ENSGALT00000010362	GO:0005887(integral component of plasma membrane);GO:0055085(transmembrane transport);GO:0016021(integral component of membrane);GO:0016020(membrane);GO:0008028(monocarboxylic acid transmembrane transporter activity);GO:0015718(monocarboxylic acid transport)	NA	NA	NA	solute carrier family 16 member 12 [Source:HGNC Symbol;Acc:HGNC:23094]	3.47514	2.62161	0.140055	0	0.190236	18.4587	4.20623	4.09338e-14	6.09688e-13	up	yes
ENSGALG00000008727		ENSGALT00000014202;ENSGALT00000049080	GO:0009395(phospholipid catabolic process);GO:0016042(lipid catabolic process);GO:0004620(phospholipase activity);GO:0004623(phospholipase A2 activity);GO:0006629(lipid metabolic process);GO:0016787(hydrolase activity);GO:0005737(cytoplasm);GO:0046872(metal ion binding);GO:0008152(metabolic process);GO:0102567(phospholipase A2 activity (consuming 1,2-dipalmitoylphosphatidylcholine));GO:0102568(ph…	00564(Glycerophospholipid metabolism);00565(Ether lipid metabolism);00590(Arachidonic acid metabolism);00591(Linoleic acid metabolism);00592(alpha-Linolenic acid metabolism);04010(MAPK signaling pathway);04370(VEGF signaling pathway);04217(Necroptosis);04912(GnRH signaling pathway);04270(Vascular smooth muscle contraction);04270(Vascular smooth muscle contraction)	K16342	EC:3.1.1.4		5.43399	4.8264	1.64314	1.13241	1.68348	2.30103	1.20228	6.11986e-14	9.00407e-13	up	yes
ENSGALG00000008349	LMCD1	ENSGALT00000013590;ENSGALT00000072231	GO:0031012(extracellular matrix);GO:0005634(nucleus);GO:0005615(extracellular space);GO:0070886(positive regulation of calcineurin-NFAT signaling cascade);GO:0010611(regulation of cardiac muscle hypertrophy);GO:0000122(negative regulation of transcription from RNA polymerase II promoter);GO:0003714(transcription corepressor activity);GO:0046872(metal ion binding);GO:0008270(zinc ion binding);GO:0…	NA	NA	NA	LIM and cysteine rich domains 1 [Source:HGNC Symbol;Acc:HGNC:6633]	11.3276	9.36958	1.39645	0.948731	2.90358	3.94325	1.97938	1.0191e-13	1.4621e-12	up	yes
ENSGALG00000011206	KITLG	ENSGALT00000018268;ENSGALT00000044248;ENSGALT00000043298	GO:0030175(filopodium);GO:0030027(lamellipodium);GO:0016021(integral component of membrane);GO:0005886(plasma membrane);GO:0005737(cytoplasm);GO:0005615(extracellular space);GO:1902035(positive regulation of hematopoietic stem cell proliferation);GO:0097192(extrinsic apoptotic signaling pathway in absence of ligand);GO:0070668(positive regulation of mast cell proliferation);GO:0050731(positive re…	04060(Cytokine-cytokine receptor interaction);04916(Melanogenesis);04916(Melanogenesis)	K05461	NA	KIT ligand [Source:HGNC Symbol;Acc:HGNC:6343]	6.47812	5.90963	1.31919	1.34951	1.82288	2.758	1.46362	1.32234e-13	1.88697e-12	up	yes
ENSGALG00000030937		ENSGALT00000062292	NA	NA	NA	NA		1.90011	1.75987	0	0	0.110054	33.2562	5.05555	1.34917e-13	1.91906e-12	up	yes
ENSGALG00000016301	MLIP	ENSGALT00000026298;ENSGALT00000055273	NA	NA	NA	NA	muscular LMNA interacting protein [Source:HGNC Symbol;Acc:HGNC:21355]	47.1446	12.1875	4.12393	1.67319	4.95472	5.51832	2.46423	1.72831e-13	2.44004e-12	up	yes
ENSGALG00000002728	SLC16A3	ENSGALT00000004306;ENSGALT00000068113	GO:0031965(nuclear membrane);GO:0005887(integral component of plasma membrane);GO:0005886(plasma membrane);GO:0055085(transmembrane transport);GO:0035873(lactate transmembrane transport);GO:0015718(monocarboxylic acid transport);GO:0015129(lactate transmembrane transporter activity);GO:0008028(monocarboxylic acid transmembrane transporter activity);GO:0003723(RNA binding);GO:0016021(integral comp…	NA	NA	NA	solute carrier family 16 member 3 [Source:HGNC Symbol;Acc:HGNC:10924]	5.62988	4.88218	1.64524	1.7087	1.38227	2.21951	1.15024	1.75372e-13	2.47066e-12	up	yes
ENSGALG00000000295		ENSGALT00000053002;ENSGALT00000000386	NA	NA	NA	NA		3.21329	2.66934	0.653737	1.04693	0.536743	2.62922	1.39463	2.06483e-13	2.9028e-12	up	yes
ENSGALG00000031425	PMP22	ENSGALT00000088817;ENSGALT00000048380	NA	NA	NA	NA	peripheral myelin protein 22 [Source:HGNC Symbol;Acc:HGNC:9118]	187.597	169.294	13.6159	47.1254	48.067	3.28	1.71369	2.33852e-13	3.25992e-12	up	yes
ENSGALG00000016388	KLHL34	ENSGALT00000026436	GO:0005615(extracellular space);GO:0031463(Cul3-RING ubiquitin ligase complex);GO:0004842(ubiquitin-protein transferase activity);GO:0016567(protein ubiquitination)	NA	NA	NA	kelch like family member 34 [Source:HGNC Symbol;Acc:HGNC:26634]	10.8056	7.18015	2.08993	0.542874	1.29059	4.58423	2.19668	2.44027e-13	3.39109e-12	up	yes
ENSGALG00000015602	CKMT2	ENSGALT00000032786;ENSGALT00000067993	GO:0005739(mitochondrion);GO:0016772(transferase activity, transferring phosphorus-containing groups);GO:0016301(kinase activity);GO:0003824(catalytic activity);GO:0016740(transferase activity);GO:0005524(ATP binding);GO:0000166(nucleotide binding);GO:0016310(phosphorylation);GO:0016310(phosphorylation)	00330(Arginine and proline metabolism);00330(Arginine and proline metabolism)	K00933	EC:2.7.3.2	creatine kinase, mitochondrial 2 [Source:HGNC Symbol;Acc:HGNC:1996]	7.29218	6.58194	0	0.464813	0.160222	22.1974	4.47232	3.02521e-13	4.16037e-12	up	yes
ENSGALG00000023517	AGPAT2	ENSGALT00000039021	GO:0005783(endoplasmic reticulum);GO:0046474(glycerophospholipid biosynthetic process);GO:0008654(phospholipid biosynthetic process);GO:0006654(phosphatidic acid biosynthetic process);GO:0001819(positive regulation of cytokine production);GO:0016411(acylglycerol O-acyltransferase activity);GO:0003841(1-acylglycerol-3-phosphate O-acyltransferase activity);GO:0016746(transferase activity, transferr…	NA	NA	NA	1-acylglycerol-3-phosphate O-acyltransferase 2 [Source:HGNC Symbol;Acc:HGNC:325]	14.253	13.7989	5.38226	3.77509	3.62137	2.1952	1.13435	3.69927e-13	5.06114e-12	up	yes
ENSGALG00000015057	DDO	ENSGALT00000024288	GO:0046416(D-amino acid metabolic process);GO:0042445(hormone metabolic process);GO:0019478(D-amino acid catabolic process);GO:0007625(grooming behavior);GO:0007320(insemination);GO:0006531(aspartate metabolic process);GO:0048037(cofactor binding);GO:0008445(D-aspartate oxidase activity);GO:0003884(D-amino-acid oxidase activity);GO:0005102(receptor binding);GO:0071949(FAD binding);GO:0016491(oxid…	00250(Alanine, aspartate and glutamate metabolism);04146(Peroxisome)	K00272	EC:1.4.3.1	D-aspartate oxidase [Source:HGNC Symbol;Acc:HGNC:2727]	12.4222	10.3103	3.74429	1.66843	2.97653	2.70973	1.43815	4.27364e-13	5.81697e-12	up	yes
ENSGALG00000009687	KCNK2	ENSGALT00000015766	GO:0008076(voltage-gated potassium channel complex);GO:0005886(plasma membrane);GO:0042391(regulation of membrane potential);GO:0007186(G-protein coupled receptor signaling pathway);GO:0006813(potassium ion transport);GO:0005249(voltage-gated potassium channel activity);GO:0034765(regulation of ion transmembrane transport);GO:0071805(potassium ion transmembrane transport);GO:0005267(potassium cha…	NA	NA	NA	potassium two pore domain channel subfamily K member 2 [Source:HGNC Symbol;Acc:HGNC:6277]	6.4754	7.71227	1.7489	0.780466	0.748136	4.32881	2.11397	4.4164e-13	5.99898e-12	up	yes
ENSGALG00000023083	KIAA1958	ENSGALT00000037626	GO:0005654(nucleoplasm);GO:0006357(regulation of transcription from RNA polymerase II promoter);GO:0003677(DNA binding);GO:0000981(RNA polymerase II transcription factor activity, sequence-specific DNA binding);GO:0005737(cytoplasm)	NA	NA	NA	KIAA1958 [Source:HGNC Symbol;Acc:HGNC:23427]	4.94197	4.54268	1.22859	0.826428	1.4923	2.67376	1.41887	5.59615e-13	7.47148e-12	up	yes
ENSGALG00000037029	PDE4C	ENSGALT00000078372	GO:0005929(cilium);GO:0005615(extracellular space)	00230(Purine metabolism)	K13293	EC:3.1.4.53	phosphodiesterase 4C [Source:HGNC Symbol;Acc:HGNC:8782]	1.14283	1.67809	0.124803	0.210686	0.232598	4.96564	2.31198	8.99551e-13	1.18432e-11	up	yes
ENSGALG00000006942	PIK3IP1	ENSGALT00000011250	GO:0015293(symporter activity);GO:0055085(transmembrane transport);GO:0016021(integral component of membrane);GO:0016020(membrane);GO:0036313(phosphatidylinositol 3-kinase catalytic subunit binding);GO:0014067(negative regulation of phosphatidylinositol 3-kinase signaling);GO:0043553(negative regulation of phosphatidylinositol 3-kinase activity);GO:0070062(extracellular exosome)	NA	NA	NA	phosphoinositide-3-kinase interacting protein 1 [Source:HGNC Symbol;Acc:HGNC:24942]	29.9752	27.2955	7.16321	10.9234	5.75297	2.40234	1.26444	9.95098e-13	1.30236e-11	up	yes
ENSGALG00000009920	COCH	ENSGALT00000016132	GO:0070062(extracellular exosome);GO:0031012(extracellular matrix);GO:0005578(proteinaceous extracellular matrix);GO:0005576(extracellular region);GO:0045089(positive regulation of innate immune response);GO:0042742(defense response to bacterium);GO:0008360(regulation of cell shape);GO:0007605(sensory perception of sound);GO:0005518(collagen binding)	NA	NA	NA	Cochlin [Source:UniProtKB/Swiss-Prot;Acc:O42163]	3.97025	5.56496	1.14563	0.576661	0.460727	4.36791	2.12694	1.02628e-12	1.34184e-11	up	yes
ENSGALG00000008014	CEBPB	ENSGALT00000013006	GO:0016363(nuclear matrix);GO:0005737(cytoplasm);GO:0005654(nucleoplasm);GO:0005634(nucleus);GO:0000790(nuclear chromatin);GO:0000779(condensed chromosome, centromeric region);GO:2000617(positive regulation of histone H3-K9 acetylation);GO:2000144(positive regulation of DNA-templated transcription, initiation);GO:1990440(positive regulation of transcription from RNA polymerase II promoter in resp…	NA	NA	NA	CCAAT/enhancer binding protein beta [Source:HGNC Symbol;Acc:HGNC:1834]	5.36207	4.18552	1.00325	0.857233	1.04473	3.28637	1.71649	1.47235e-12	1.90258e-11	up	yes
ENSGALG00000008814	ASB15	ENSGALT00000014328	GO:0000151(ubiquitin ligase complex);GO:0004842(ubiquitin-protein transferase activity);GO:0031625(ubiquitin protein ligase binding);GO:0016567(protein ubiquitination);GO:0005634(nucleus);GO:0005737(cytoplasm);GO:0035556(intracellular signal transduction)	NA	NA	NA	ankyrin repeat and SOCS box containing 15 [Source:HGNC Symbol;Acc:HGNC:19767]	4.87745	4.40087	1.37158	0.852277	0.770169	3.09894	1.63178	1.57708e-12	2.02661e-11	up	yes
ENSGALG00000038612	COL4A3	ENSGALT00000049613	GO:0007166(cell surface receptor signaling pathway);GO:0005178(integrin binding);GO:0005604(basement membrane);GO:0008283(cell proliferation);GO:0043231(intracellular membrane-bounded organelle);GO:0006919(activation of cysteine-type endopeptidase activity involved in apoptotic process);GO:0005783(endoplasmic reticulum);GO:0016525(negative regulation of angiogenesis);GO:0038063(collagen-activated…	04512(ECM-receptor interaction);04510(Focal adhesion);04933(AGE-RAGE signaling pathway in diabetic complications)	K06237	NA	collagen type IV alpha 3 chain [Source:HGNC Symbol;Acc:HGNC:2204]	1.05216	1.35903	0.183804	0.203762	0.258327	3.73311	1.90038	2.08724e-12	2.65832e-11	up	yes
ENSGALG00000021529	GP1BB	ENSGALT00000034813	GO:0042802(identical protein binding);GO:0016021(integral component of membrane);GO:0016020(membrane)	04512(ECM-receptor interaction)	K06262	NA	glycoprotein Ib platelet beta subunit [Source:HGNC Symbol;Acc:HGNC:4440]	7.98937	10.8831	3.74923	2.2749	2.33069	2.25888	1.17561	2.71253e-12	3.38645e-11	up	yes
ENSGALG00000000560		ENSGALT00000000779	GO:0005576(extracellular region)	NA	NA	NA		12.2512	11.6914	3.23289	2.34054	3.34988	2.68316	1.42393	3.15648e-12	3.91491e-11	up	yes
ENSGALG00000032453	PMP2	ENSGALT00000078675	NA	NA	NA	NA	peripheral myelin protein 2 [Source:HGNC Symbol;Acc:HGNC:9117]	3.92156	2.26396	0.210516	0	0	29.3827	4.87689	7.11624e-12	8.50808e-11	up	yes
ENSGALG00000039459		ENSGALT00000063891;ENSGALT00000080826	NA	NA	NA	NA		7.26633	10.3716	3.11542	1.67434	2.67765	2.36199	1.24	7.18429e-12	8.57399e-11	up	yes
ENSGALG00000019761	CHAD	ENSGALT00000031388	GO:1900155(negative regulation of bone trabecula formation);GO:0060348(bone development);GO:0046426(negative regulation of JAK-STAT cascade);GO:0006469(negative regulation of protein kinase activity);GO:0004860(protein kinase inhibitor activity);GO:0019221(cytokine-mediated signaling pathway);GO:0005737(cytoplasm)	04512(ECM-receptor interaction);04510(Focal adhesion)	K06248	NA	chondroadherin [Source:HGNC Symbol;Acc:HGNC:1909]	4.49379	6.46668	1.92203	1.74264	1.53111	2.1095	1.0769	1.16311e-11	1.36357e-10	up	yes
ENSGALG00000002864	LRRTM3	ENSGALT00000034096	GO:1902004(positive regulation of amyloid-beta formation);GO:0051965(positive regulation of synapse assembly);GO:0046426(negative regulation of JAK-STAT cascade);GO:0006469(negative regulation of protein kinase activity);GO:0004860(protein kinase inhibitor activity);GO:0019221(cytokine-mediated signaling pathway);GO:0005737(cytoplasm);GO:0016021(integral component of membrane);GO:0016020(membrane)	NA	NA	NA	leucine rich repeat transmembrane neuronal 3 [Source:HGNC Symbol;Acc:HGNC:19410]	1.83779	2.97043	0.571151	0.235403	0.440762	3.85485	1.94667	1.23084e-11	1.4379e-10	up	yes
ENSGALG00000034593		ENSGALT00000058048	NA	NA	NA	NA		11.2643	9.70483	2.91606	1.46645	0.693742	4.13083	2.04643	1.53749e-11	1.77272e-10	up	yes
ENSGALG00000002623	PCOLCE2	ENSGALT00000004131	GO:0016504(peptidase activator activity);GO:0070062(extracellular exosome);GO:0008201(heparin binding);GO:0005518(collagen binding);GO:0010952(positive regulation of peptidase activity);GO:0005576(extracellular region);GO:1990830(cellular response to leukemia inhibitory factor)	NA	NA	NA	procollagen C-endopeptidase enhancer 2 [Source:HGNC Symbol;Acc:HGNC:8739]	6.21593	6.22244	0.725289	0.639833	0.07769	8.62092	3.10784	1.57832e-11	1.81664e-10	up	yes
ENSGALG00000007796	BCAS1	ENSGALT00000082313;ENSGALT00000012644	GO:0070062(extracellular exosome);GO:0070062(extracellular exosome)	NA	NA	NA	breast carcinoma amplified sequence 1 [Source:HGNC Symbol;Acc:HGNC:974]	3.60855	4.06167	0.577378	0.978602	0.824379	3.2223	1.68809	1.67563e-11	1.92364e-10	up	yes
ENSGALG00000031780		ENSGALT00000069497	NA	NA	NA	NA		7.48967	6.96325	2.71865	1.69703	2.00675	2.25039	1.17017	2.4356e-11	2.74854e-10	up	yes
ENSGALG00000036316		ENSGALT00000053641	NA	NA	NA	NA		19.0336	25.2378	7.07555	6.15352	4.09813	2.55502	1.35333	3.30614e-11	3.67777e-10	up	yes
ENSGALG00000030855		ENSGALT00000074881	NA	NA	NA	NA		6.05427	4.17759	0.38968	0	0	26.2571	4.71464	3.85483e-11	4.27024e-10	up	yes
ENSGALG00000044389		ENSGALT00000084205	NA	NA	NA	NA		13.5478	22.5236	5.53619	3.94673	1.84919	3.18312	1.67044	5.73854e-11	6.24743e-10	up	yes
ENSGALG00000033466		ENSGALT00000053832	NA	NA	NA	NA		3.9903	4.66696	1.07534	0.680375	0.991372	3.15143	1.65601	5.87148e-11	6.37646e-10	up	yes
ENSGALG00000005747		ENSGALT00000009229	GO:0008236(serine-type peptidase activity);GO:0006508(proteolysis);GO:0004252(serine-type endopeptidase activity);GO:0016787(hydrolase activity);GO:0008233(peptidase activity)	NA	NA	NA		10.5046	7.77782	3.31717	2.30247	2.02343	2.39203	1.25823	6.50061e-11	7.01378e-10	up	yes
ENSGALG00000007268		ENSGALT00000011770;ENSGALT00000080292	GO:1990504(dense core granule exocytosis);GO:0016079(synaptic vesicle exocytosis);GO:0045202(synapse);GO:0098793(presynapse);GO:0098793(presynapse)	NA	NA	NA		1.52893	1.61865	0.0866213	0.257548	0.286474	4.99106	2.31935	6.94972e-11	7.4801e-10	up	yes
ENSGALG00000001698	GABRA1	ENSGALT00000002609	GO:1902711(GABA-A receptor complex);GO:0005886(plasma membrane);GO:1902476(chloride transmembrane transport);GO:0060078(regulation of postsynaptic membrane potential);GO:1904315(transmitter-gated ion channel activity involved in regulation of postsynaptic membrane potential);GO:0022851(GABA-gated chloride ion channel activity);GO:0034707(chloride channel complex);GO:0005254(chloride channel activ…	04080(Neuroactive ligand-receptor interaction)	K05175	NA	gamma-aminobutyric acid type A receptor alpha1 subunit [Source:HGNC Symbol;Acc:HGNC:4075]	1.37045	5.89066	0.589586	0.155464	0.252386	7.27977	2.86389	7.61562e-11	8.17471e-10	up	yes
ENSGALG00000032986	CFTR	ENSGALT00000047691;ENSGALT00000054667	GO:0055037(recycling endosome);GO:0009986(cell surface);GO:1902476(chloride transmembrane transport);GO:0005769(early endosome);GO:0016887(ATPase activity);GO:0005887(integral component of plasma membrane);GO:0019899(enzyme binding);GO:0005254(chloride channel activity);GO:0005789(endoplasmic reticulum membrane);GO:0005829(cytosol);GO:0005737(cytoplasm);GO:0005886(plasma membrane);GO:0016021(inte…	02010(ABC transporters);04530(Tight junction);04530(Tight junction)	NA	NA	cystic fibrosis transmembrane conductance regulator [Source:RefSeq peptide;Acc:NP_001099136]	1.11017	0.748521	0.144546	0.174185	0.150939	3.95743	1.98457	7.61971e-11	8.17471e-10	up	yes
ENSGALG00000035282	IGF2	ENSGALT00000053800	GO:0070062(extracellular exosome);GO:0051897(positive regulation of protein kinase B signaling);GO:0046628(positive regulation of insulin receptor signaling pathway);GO:0045840(positive regulation of mitotic nuclear division);GO:0043410(positive regulation of MAPK cascade);GO:0042104(positive regulation of activated T cell proliferation);GO:0008083(growth factor activity);GO:0005159(insulin-like …	NA	NA	NA	Insulin-like growth factor II [Source:UniProtKB/Swiss-Prot;Acc:P33717]	9.99372	6.48762	2.68995	2.45713	1.92058	2.33194	1.22153	8.90811e-11	9.51848e-10	up	yes
ENSGALG00000005017	DUSP13	ENSGALT00000008034	GO:0016311(dephosphorylation);GO:0016791(phosphatase activity);GO:0035335(peptidyl-tyrosine dephosphorylation);GO:0006470(protein dephosphorylation);GO:0008138(protein tyrosine/serine/threonine phosphatase activity);GO:0004725(protein tyrosine phosphatase activity)	NA	NA	NA	dual specificity phosphatase 13 [Source:HGNC Symbol;Acc:HGNC:19681]	2.76411	2.30271	0.174112	0.34791	0.261786	6.46436	2.69251	1.47723e-10	1.54244e-09	up	yes
ENSGALG00000007710		ENSGALT00000012493;ENSGALT00000083700;ENSGALT00000086947	GO:0005525(GTP binding);GO:0003924(GTPase activity);GO:0000166(nucleotide binding);GO:0007165(signal transduction);GO:0016020(membrane);GO:0016020(membrane)	NA	NA	NA		8.97862	8.50442	1.70918	3.68952	1.8115	2.42477	1.27785	1.59575e-10	1.66096e-09	up	yes
ENSGALG00000010322	JDP2	ENSGALT00000016803	GO:0031063(regulation of histone deacetylation);GO:0006357(regulation of transcription from RNA polymerase II promoter);GO:0003700(transcription factor activity, sequence-specific DNA binding);GO:0006355(regulation of transcription, DNA-templated);GO:0005634(nucleus);GO:0003677(DNA binding);GO:0000978(RNA polymerase II core promoter proximal region sequence-specific DNA binding);GO:0001078(transc…	NA	NA	NA	Jun dimerization protein 2 [Source:HGNC Symbol;Acc:HGNC:17546]	18.0074	20.0325	3.34607	6.67927	5.87152	2.39292	1.25877	1.93832e-10	2.00182e-09	up	yes
ENSGALG00000001620		ENSGALT00000002476;ENSGALT00000079593;ENSGALT00000048798	GO:0010038(response to metal ion);GO:0005507(copper ion binding);GO:0005507(copper ion binding)	NA	NA	NA		9.97237	8.18071	1.98233	3.01631	1.09115	2.9809	1.57575	2.62154e-10	2.67619e-09	up	yes
ENSGALG00000045362		ENSGALT00000085145	NA	NA	NA	NA		11.3646	14.9862	2.80264	1.39994	1.82691	4.37032	2.12774	2.73317e-10	2.78372e-09	up	yes
ENSGALG00000023580	CLDN19	ENSGALT00000039213	GO:0043296(apical junction complex);GO:0030054(cell junction);GO:0016323(basolateral plasma membrane);GO:0005923(bicellular tight junction);GO:0005737(cytoplasm);GO:0005634(nucleus);GO:0043297(apical junction assembly);GO:0019227(neuronal action potential propagation);GO:0005198(structural molecule activity);GO:0005886(plasma membrane);GO:0016021(integral component of membrane);GO:0016020(membran…	04514(Cell adhesion molecules (CAMs));04530(Tight junction)	K06087	NA	claudin 19 [Source:HGNC Symbol;Acc:HGNC:2040]	6.30416	12.3087	2.16172	1.03586	1.09692	4.33412	2.11574	2.79928e-10	2.84233e-09	up	yes
ENSGALG00000018288	gga-mir-1a-2	ENSGALT00000028995	NA	NA	NA	NA	gga-mir-1a-2 [Source:miRBase;Acc:MI0001196]	69.4739	82.8862	23.6632	17.8644	16.1441	2.64185	1.40155	3.19157e-10	3.22094e-09	up	yes
ENSGALG00000031713	POU6F2	ENSGALT00000081696	NA	NA	NA	NA	POU class 6 homeobox 2 [Source:HGNC Symbol;Acc:HGNC:21694]	0.795542	0.569885	0.056774	0.028238	0.052558	9.92533	3.31111	3.85726e-10	3.84307e-09	up	yes
ENSGALG00000016785	IL1RL1	ENSGALT00000027103;ENSGALT00000021769;ENSGALT00000027102;ENSGALT00000030235	GO:0004908(interleukin-1 receptor activity);GO:0019221(cytokine-mediated signaling pathway);GO:0016020(membrane);GO:0009897(external side of plasma membrane);GO:0005578(proteinaceous extracellular matrix);GO:0090197(positive regulation of chemokine secretion);GO:0050729(positive regulation of inflammatory response);GO:0043124(negative regulation of I-kappaB kinase/NF-kappaB signaling);GO:0043032(…	NA	NA	NA	interleukin 1 receptor like 1 [Source:HGNC Symbol;Acc:HGNC:5998]	1.31582	0.9266	0.228891	0.159068	0.142881	4.22429	2.07871	5.57142e-10	5.44465e-09	up	yes
ENSGALG00000003980	IQCA1	ENSGALT00000006341	GO:0005524(ATP binding)	NA	NA	NA	IQ motif containing with AAA domain 1 [Source:HGNC Symbol;Acc:HGNC:26195]	0.926843	0.881065	0.15107	0.071653	0.05456	6.52008	2.70489	7.25391e-10	7.00121e-09	up	yes
ENSGALG00000007864	ARMC3	ENSGALT00000012763;ENSGALT00000074372;ENSGALT00000065281;ENSGALT00000071905	GO:0070062(extracellular exosome);GO:0005634(nucleus);GO:0005737(cytoplasm);GO:0005737(cytoplasm)	NA	NA	NA	armadillo repeat containing 3 [Source:HGNC Symbol;Acc:HGNC:30964]	0.537607	1.33051	0.0977005	0.0676776	0.134499	6.2296	2.63914	7.31965e-10	7.0544e-09	up	yes
ENSGALG00000034524		ENSGALT00000054325	NA	NA	NA	NA		6.13002	8.72038	1.70073	1.99082	1.61063	2.80081	1.48585	7.61821e-10	7.32618e-09	up	yes
ENSGALG00000017021	ATP7B	ENSGALT00000027501	GO:0048471(perinuclear region of cytoplasm);GO:0032588(trans-Golgi network membrane);GO:0031410(cytoplasmic vesicle);GO:0016323(basolateral plasma membrane);GO:0016020(membrane);GO:0005802(trans-Golgi network);GO:0005794(Golgi apparatus);GO:0005770(late endosome);GO:0060003(copper ion export);GO:0051208(sequestering of calcium ion);GO:0046688(response to copper ion);GO:0035434(copper ion transmem…	NA	NA	NA	ATPase copper transporting beta [Source:HGNC Symbol;Acc:HGNC:870]	0.652496	0.815396	0.035714	0.088149	0.128264	5.82203	2.54152	7.81179e-10	7.5069e-09	up	yes
ENSGALG00000006575	VIPR2	ENSGALT00000010623	GO:0007166(cell surface receptor signaling pathway);GO:0004888(transmembrane signaling receptor activity);GO:0004999(vasoactive intestinal polypeptide receptor activity);GO:0005886(plasma membrane);GO:0007186(G-protein coupled receptor signaling pathway);GO:0007165(signal transduction);GO:0004930(G-protein coupled receptor activity);GO:0004871(signal transducer activity);GO:0016021(integral compo…	04080(Neuroactive ligand-receptor interaction)	K04590	NA	vasoactive intestinal peptide receptor 2 [Source:HGNC Symbol;Acc:HGNC:12695]	5.24162	2.45878	0.405123	0.82705	0.784473	3.81842	1.93298	8.79551e-10	8.42508e-09	up	yes
ENSGALG00000001936	MYO7B	ENSGALT00000002994	GO:0090651(apical cytoplasm);GO:0070062(extracellular exosome);GO:0016459(myosin complex);GO:0005903(brush border);GO:0005902(microvillus);GO:0003774(motor activity);GO:1904970(brush border assembly);GO:0005856(cytoskeleton);GO:0005524(ATP binding)	NA	NA	NA	myosin VIIB [Source:HGNC Symbol;Acc:HGNC:7607]	0.327628	0.39931	0.031584	0	0.032131	11.4092	3.51213	1.10978e-09	1.04305e-08	up	yes
ENSGALG00000046299	CNKSR1	ENSGALT00000088784	GO:0007266(Rho protein signal transduction);GO:0007265(Ras protein signal transduction);GO:0005938(cell cortex);GO:0030674(protein binding, bridging)	NA	NA	NA	connector enhancer of kinase suppressor of Ras 1 [Source:HGNC Symbol;Acc:HGNC:19700]	1.71839	1.15905	0.27554	0.161352	0.277886	4.02564	2.00922	1.45024e-09	1.34026e-08	up	yes
ENSGALG00000029427		ENSGALT00000053348	NA	NA	NA	NA		4.64006	5.09649	1.0022	1.52929	1.1646	2.63428	1.39741	1.50346e-09	1.38655e-08	up	yes
ENSGALG00000011404	HOPX	ENSGALT00000037951	GO:0006357(regulation of transcription from RNA polymerase II promoter);GO:0005634(nucleus);GO:0005737(cytoplasm);GO:0007275(multicellular organism development);GO:0006355(regulation of transcription, DNA-templated);GO:0006351(transcription, DNA-templated);GO:0003677(DNA binding);GO:0000122(negative regulation of transcription from RNA polymerase II promoter);GO:0007507(heart development);GO:0008…	NA	NA	NA	Homeodomain-only protein [Source:UniProtKB/Swiss-Prot;Acc:Q8JHU0]	8.35804	7.17787	2.5635	0.992367	1.67377	2.97074	1.57082	1.62535e-09	1.49274e-08	up	yes
ENSGALG00000041749		ENSGALT00000060963	NA	NA	NA	NA		10.3544	14.1304	4.81193	3.29528	3.03673	2.19714	1.13563	1.70402e-09	1.55852e-08	up	yes
ENSGALG00000016570		ENSGALT00000026745	GO:0019853(L-ascorbic acid biosynthetic process);GO:0050660(flavin adenine dinucleotide binding);GO:0050105(L-gulonolactone oxidase activity);GO:0016899(oxidoreductase activity, acting on the CH-OH group of donors, oxygen as acceptor);GO:0003885(D-arabinono-1,4-lactone oxidase activity);GO:0016614(oxidoreductase activity, acting on CH-OH group of donors);GO:0016491(oxidoreductase activity);GO:000…	00053(Ascorbate and aldarate metabolism)	K00103	EC:1.1.3.8		1.4636	0.791898	0.118642	0.111183	0.124607	6.36369	2.66986	1.97734e-09	1.79366e-08	up	yes
ENSGALG00000042383		ENSGALT00000069905;ENSGALT00000066074	NA	NA	NA	NA		6.93863	9.13423	2.6136	1.62813	2.25755	2.47302	1.30627	2.56792e-09	2.29642e-08	up	yes
ENSGALG00000039145	CA8	ENSGALT00000061945	NA	00910(Nitrogen metabolism)	K01672	EC:4.2.1.1	carbonic anhydrase 8 [Source:HGNC Symbol;Acc:HGNC:1382]	4.12324	5.71223	1.43278	0.805052	1.53245	2.60868	1.38332	2.92028e-09	2.58712e-08	up	yes
ENSGALG00000016300	TINAG	ENSGALT00000026295	GO:0043231(intracellular membrane-bounded organelle);GO:0005604(basement membrane);GO:0007155(cell adhesion);GO:0030247(polysaccharide binding);GO:0008234(cysteine-type peptidase activity);GO:0006955(immune response);GO:0006508(proteolysis);GO:0005615(extracellular space);GO:0006898(receptor-mediated endocytosis);GO:0005044(scavenger receptor activity)	NA	NA	NA	tubulointerstitial nephritis antigen [Source:HGNC Symbol;Acc:HGNC:14599]	4.91908	4.95966	0.157092	0.524104	0	14.502	3.85818	3.12671e-09	2.75712e-08	up	yes
ENSGALG00000041414	BHLHE41	ENSGALT00000046906	GO:0045892(negative regulation of transcription, DNA-templated);GO:0070888(E-box binding);GO:0046982(protein heterodimerization activity);GO:0000122(negative regulation of transcription from RNA polymerase II promoter);GO:0042803(protein homodimerization activity);GO:0042826(histone deacetylase binding);GO:0043425(bHLH transcription factor binding);GO:0001102(RNA polymerase II activating transcri…	NA	NA	NA	basic helix-loop-helix family member e41 [Source:HGNC Symbol;Acc:HGNC:16617]	7.7886	7.43499	2.1436	2.58813	1.59318	2.40692	1.26719	3.24079e-09	2.84825e-08	up	yes
ENSGALG00000032541		ENSGALT00000051200;ENSGALT00000056376	NA	NA	NA	NA		2.1835	2.91975	0.595932	0.246735	0.364871	4.22616	2.07935	3.81277e-09	3.32671e-08	up	yes
ENSGALG00000042277		ENSGALT00000074293	NA	NA	NA	NA		9.1099	4.3734	1.1693	1.06391	1.52141	3.59112	1.84444	3.83194e-09	3.34124e-08	up	yes
ENSGALG00000026590		ENSGALT00000045929	GO:0000981(RNA polymerase II transcription factor activity, sequence-specific DNA binding);GO:0006357(regulation of transcription from RNA polymerase II promoter);GO:0005634(nucleus);GO:0003676(nucleic acid binding)	NA	NA	NA		9.87179	8.57379	1.67623	2.02186	2.73291	2.86823	1.52016	4.11118e-09	3.56831e-08	up	yes
ENSGALG00000020788		ENSGALT00000014694	GO:0005813(centrosome);GO:0005737(cytoplasm);GO:0051642(centrosome localization);GO:0021799(cerebral cortex radially oriented cell migration);GO:0016021(integral component of membrane);GO:0016020(membrane)	NA	NA	NA		57.4988	88.4376	20.8426	6.46488	29.2624	2.57975	1.36723	5.03752e-09	4.32425e-08	up	yes
ENSGALG00000040180	CEBPD	ENSGALT00000066024	GO:0046982(protein heterodimerization activity);GO:0005634(nucleus);GO:0006357(regulation of transcription from RNA polymerase II promoter);GO:0005654(nucleoplasm);GO:0000978(RNA polymerase II core promoter proximal region sequence-specific DNA binding);GO:0001077(transcriptional activator activity, RNA polymerase II core promoter proximal region sequence-specific binding);GO:0003677(DNA binding)…	NA	NA	NA	CCAAT/enhancer binding protein delta [Source:HGNC Symbol;Acc:HGNC:1835]	5.53585	4.31511	1.15356	0.655995	1.0094	3.49455	1.80511	6.16918e-09	5.25489e-08	up	yes
ENSGALG00000029187		ENSGALT00000079620	NA	NA	NA	NA		5.15293	4.78987	1.35734	0.391161	1.07654	3.51951	1.81538	8.58761e-09	7.17219e-08	up	yes
ENSGALG00000031262		ENSGALT00000075581	NA	NA	NA	NA		1.45791	1.93235	0.29022	0.297738	0.364729	3.55864	1.83132	1.12039e-08	9.21233e-08	up	yes
ENSGALG00000011560	PACRG	ENSGALT00000089338;ENSGALT00000068799;ENSGALT00000082105;ENSGALT00000088292;ENSGALT00000018853;ENSGALT00000074708	GO:0097225(sperm midpiece);GO:0044297(cell body);GO:0043005(neuron projection);GO:0031982(vesicle);GO:0005929(cilium);GO:0005829(cytosol);GO:0005739(mitochondrion);GO:0005634(nucleus);GO:0060548(negative regulation of cell death);GO:0007286(spermatid development);GO:0051879(Hsp90 protein binding);GO:0051087(chaperone binding);GO:0048487(beta-tubulin binding);GO:0043014(alpha-tubulin binding);GO:0…	NA	NA	NA	parkin coregulated [Source:HGNC Symbol;Acc:HGNC:19152]	2.37045	2.9623	0.899199	0.800661	0.629533	2.28933	1.19492	1.56284e-08	1.26853e-07	up	yes
ENSGALG00000041921	CWH43	ENSGALT00000055214	NA	NA	NA	NA	cell wall biogenesis 43 C-terminal homolog [Source:HGNC Symbol;Acc:HGNC:26133]	2.634	4.0533	0	0.277544	0.337955	10.8648	3.44159	1.68174e-08	1.35836e-07	up	yes
ENSGALG00000039817		ENSGALT00000081657	NA	04350(TGF-beta signaling pathway)	K04658	NA		7.62279	5.9505	1.74645	1.64065	1.498	2.77851	1.47431	2.00991e-08	1.60779e-07	up	yes
ENSGALG00000001206		ENSGALT00000001825	NA	NA	NA	NA		2.31881	2.05108	0.235043	0.383618	0.392676	4.32091	2.11133	2.0111e-08	1.60779e-07	up	yes
ENSGALG00000041380	BFIV21	ENSGALT00000085671;ENSGALT00000079478;ENSGALT00000080781;ENSGALT00000087837;ENSGALT00000077683;ENSGALT00000088264	GO:0005886(plasma membrane);GO:0046872(metal ion binding);GO:0016021(integral component of membrane);GO:0016020(membrane);GO:0016020(membrane)	04514(Cell adhesion molecules (CAMs));04144(Endocytosis);04145(Phagosome);04218(Cellular senescence);05168(Herpes simplex infection);05168(Herpes simplex infection)	K06751	NA		6.29774	11.4027	0.894277	3.16111	2.08861	2.88094	1.52654	2.0606e-08	1.64439e-07	up	yes
ENSGALG00000002152	GABRP	ENSGALT00000003373	GO:0055085(transmembrane transport);GO:0045202(synapse);GO:1902711(GABA-A receptor complex);GO:0030054(cell junction);GO:0007165(signal transduction);GO:0005230(extracellular ligand-gated ion channel activity);GO:0004890(GABA-A receptor activity);GO:0006811(ion transport);GO:0034220(ion transmembrane transport);GO:0005216(ion channel activity);GO:0006810(transport);GO:0005886(plasma membrane);GO:…	04080(Neuroactive ligand-receptor interaction)	K05189	NA	gamma-aminobutyric acid type A receptor pi subunit [Source:HGNC Symbol;Acc:HGNC:4089]	3.18985	4.07828	0.289778	0.413417	0	10.3359	3.36959	2.17129e-08	1.72753e-07	up	yes
ENSGALG00000000112	PLP1	ENSGALT00000000161	GO:0043209(myelin sheath);GO:0005886(plasma membrane);GO:0061564(axon development);GO:0048469(cell maturation);GO:0042759(long-chain fatty acid biosynthetic process);GO:0042552(myelination);GO:0022010(central nervous system myelination);GO:0021762(substantia nigra development);GO:0014002(astrocyte development);GO:0010628(positive regulation of gene expression);GO:0008366(axon ensheathment);GO:000…	NA	NA	NA	proteolipid protein 1 [Source:HGNC Symbol;Acc:HGNC:9086]	5.12638	6.14943	0.509579	1.4206	1.45476	3.33117	1.73603	2.37309e-08	1.87349e-07	up	yes
ENSGALG00000034767		ENSGALT00000059728	NA	NA	NA	NA		4.39696	4.94588	0	0.307257	0.564811	10.7134	3.42135	2.53565e-08	1.99352e-07	up	yes
ENSGALG00000016522	PPEF1	ENSGALT00000026662	GO:0050906(detection of stimulus involved in sensory perception);GO:0006470(protein dephosphorylation);GO:0004721(phosphoprotein phosphatase activity);GO:0030145(manganese ion binding);GO:0016787(hydrolase activity);GO:0005506(iron ion binding);GO:0005509(calcium ion binding)	NA	NA	NA	protein phosphatase with EF-hand domain 1 [Source:HGNC Symbol;Acc:HGNC:9243]	1.62268	2.21879	0.581557	0.427008	0.335517	2.85807	1.51504	2.78149e-08	2.17648e-07	up	yes
ENSGALG00000010909	PRKG2	ENSGALT00000017742	GO:0030553(cGMP binding);GO:0004692(cGMP-dependent protein kinase activity);GO:0006468(protein phosphorylation);GO:0016740(transferase activity);GO:0005524(ATP binding);GO:0004674(protein serine/threonine kinase activity);GO:0004672(protein kinase activity);GO:0000166(nucleotide binding);GO:0016310(phosphorylation);GO:0016301(kinase activity)	04540(Gap junction)	K19477	EC:2.7.11.12	protein kinase, cGMP-dependent, type II [Source:HGNC Symbol;Acc:HGNC:9416]	1.19944	1.65612	0.182588	0.101199	0.3492	4.51124	2.17352	3.02681e-08	2.35318e-07	up	yes
ENSGALG00000018293	gga-mir-133a-2	ENSGALT00000029000	NA	NA	NA	NA	gga-mir-133a-2 [Source:miRBase;Acc:MI0001248]	56.1041	75.7993	18.8419	22.8288	22.1403	2.0671	1.04761	4.31261e-08	3.28546e-07	up	yes
ENSGALG00000007335	KBTBD13	ENSGALT00000011869	GO:0031463(Cul3-RING ubiquitin ligase complex);GO:0004842(ubiquitin-protein transferase activity);GO:0016567(protein ubiquitination)	NA	NA	NA	kelch repeat and BTB domain containing 13 [Source:HGNC Symbol;Acc:HGNC:37227]	2.22334	2.13	0.418736	0.09454	0.428035	4.62476	2.20938	4.66003e-08	3.52584e-07	up	yes
ENSGALG00000010762	OPN3	ENSGALT00000017501	GO:0009584(detection of visible light);GO:0001750(photoreceptor outer segment);GO:0050896(response to stimulus);GO:0018298(protein-chromophore linkage);GO:0007602(phototransduction);GO:0007601(visual perception);GO:0009881(photoreceptor activity);GO:0007186(G-protein coupled receptor signaling pathway);GO:0007165(signal transduction);GO:0004930(G-protein coupled receptor activity);GO:0004871(sign…	NA	NA	NA	opsin 3 [Source:HGNC Symbol;Acc:HGNC:14007]	1.777	1.86327	0.35219	0.378821	0.214978	3.84812	1.94415	5.44593e-08	4.08552e-07	up	yes
ENSGALG00000029286		ENSGALT00000088976;ENSGALT00000056139	NA	NA	NA	NA		1.79951	2.24759	0.655553	0.773354	0.51755	2.07921	1.05604	5.70141e-08	4.26513e-07	up	yes
ENSGALG00000009063		ENSGALT00000014751	GO:0005667(transcription factor complex);GO:0003700(transcription factor activity, sequence-specific DNA binding);GO:0006355(regulation of transcription, DNA-templated);GO:0006351(transcription, DNA-templated);GO:0046983(protein dimerization activity);GO:0005737(cytoplasm);GO:0005634(nucleus);GO:0003677(DNA binding)	NA	NA	NA		1.96931	2.57683	0.556107	0.707079	0.595388	2.44604	1.29045	5.7208e-08	4.27722e-07	up	yes
ENSGALG00000034511		ENSGALT00000075591	NA	NA	NA	NA		9.00717	5.76037	2.83539	0.793849	1.77219	2.73401	1.45102	8.05614e-08	5.89703e-07	up	yes
ENSGALG00000005956		ENSGALT00000009577	GO:0005544(calcium-dependent phospholipid binding);GO:0005509(calcium ion binding)	NA	NA	NA		3.05575	5.53171	0.773742	1.18136	0.662942	3.28011	1.71374	9.158e-08	6.6595e-07	up	yes
ENSGALG00000028210		ENSGALT00000042995	GO:0009116(nucleoside metabolic process);GO:0003999(adenine phosphoribosyltransferase activity);GO:0006168(adenine salvage)	NA	NA	NA		14.7188	26.6118	0	2.27044	0.917227	12.9658	3.69664	9.56495e-08	6.94021e-07	up	yes
ENSGALG00000009388	SUSD4	ENSGALT00000015298	GO:0030449(regulation of complement activation);GO:0016021(integral component of membrane);GO:0016020(membrane)	NA	NA	NA	sushi domain containing 4 [Source:HGNC Symbol;Acc:HGNC:25470]	3.65085	2.75252	0.970505	0.760447	0.927613	2.40858	1.26818	1.00447e-07	7.25262e-07	up	yes
ENSGALG00000039170	LHFPL5	ENSGALT00000055378;ENSGALT00000050484	GO:0007605(sensory perception of sound);GO:0060088(auditory receptor cell stereocilium organization);GO:0016324(apical plasma membrane);GO:0005886(plasma membrane);GO:0050910(detection of mechanical stimulus involved in sensory perception of sound);GO:0032421(stereocilium bundle);GO:0032426(stereocilium tip);GO:0032426(stereocilium tip)	NA	NA	NA	LHFPL tetraspan subfamily member 5 [Source:HGNC Symbol;Acc:HGNC:21253]	3.44409	2.09761	0.416801	0.385589	0.838532	3.37719	1.75582	1.09755e-07	7.88178e-07	up	yes
ENSGALG00000011360	PRKAG3	ENSGALT00000038233;ENSGALT00000066829	GO:0015758(glucose transport);GO:0005978(glycogen biosynthetic process);GO:0005978(glycogen biosynthetic process)	04371(Apelin signaling pathway);04068(FoxO signaling pathway);04530(Tight junction);04910(Insulin signaling pathway);04920(Adipocytokine signaling pathway);04920(Adipocytokine signaling pathway)	K07200	NA	5'-AMP-activated protein kinase subunit gamma-3 [Source:RefSeq peptide;Acc:NP_001026429]	4.02817	4.20366	0.319947	1.4011	0.774004	3.29926	1.72214	1.17745e-07	8.40556e-07	up	yes
ENSGALG00000038728		ENSGALT00000057174	NA	04080(Neuroactive ligand-receptor interaction)	K04210	NA		1.44053	2.53951	0.258659	0	0.221696	8.28562	3.05061	1.67048e-07	1.16925e-06	up	yes
ENSGALG00000010518	NRXN3	ENSGALT00000017123;ENSGALT00000084758	GO:0043234(protein complex);GO:0007416(synapse assembly);GO:0007269(neurotransmitter secretion);GO:0007268(chemical synaptic transmission);GO:0005246(calcium channel regulator activity);GO:0016021(integral component of membrane);GO:0016021(integral component of membrane)	NA	NA	NA	neurexin 3 [Source:HGNC Symbol;Acc:HGNC:8010]	3.14657	1.87067	0.391143	0.129862	0.776323	3.86736	1.95135	1.74164e-07	1.21394e-06	up	yes
ENSGALG00000006807	PLSCR5	ENSGALT00000011010;ENSGALT00000049683	GO:0017121(phospholipid scrambling);GO:0017128(phospholipid scramblase activity);GO:0005886(plasma membrane);GO:0005886(plasma membrane)	NA	NA	NA	phospholipid scramblase family member 5 [Source:HGNC Symbol;Acc:HGNC:19952]	1.83095	3.52503	0.412114	0.433257	0.768626	3.31846	1.73051	2.31137e-07	1.58033e-06	up	yes
ENSGALG00000041510		ENSGALT00000067778	NA	NA	NA	NA		0.654759	0.729078	0.150415	0.139328	0.214013	2.74704	1.45788	2.4383e-07	1.66369e-06	up	yes
ENSGALG00000042836	KCNH2	ENSGALT00000067919	GO:0005886(plasma membrane);GO:0042802(identical protein binding);GO:0009986(cell surface);GO:0048471(perinuclear region of cytoplasm);GO:0042803(protein homodimerization activity);GO:0060307(regulation of ventricular cardiac muscle cell membrane repolarization);GO:0086005(ventricular cardiac muscle cell action potential);GO:0060048(cardiac muscle contraction);GO:0031625(ubiquitin protein ligase …	NA	NA	NA	potassium voltage-gated channel subfamily H member 2 [Source:HGNC Symbol;Acc:HGNC:6251]	4.85252	5.31568	2.18661	1.33216	1.18253	2.16285	1.11294	2.4897e-07	1.69701e-06	up	yes
ENSGALG00000028177		ENSGALT00000034585	GO:0008237(metallopeptidase activity);GO:0004222(metalloendopeptidase activity);GO:0006508(proteolysis);GO:0016021(integral component of membrane);GO:0016020(membrane)	NA	NA	NA		1.72521	1.60644	0.225525	0.530327	0.330566	3.06663	1.61665	2.67406e-07	1.81336e-06	up	yes
ENSGALG00000038328	ANKRD33B	ENSGALT00000067514	NA	NA	NA	NA	ankyrin repeat domain 33B [Source:HGNC Symbol;Acc:HGNC:35240]	3.13888	2.99742	0.226431	0.363176	0.947313	3.9926	1.99733	2.81355e-07	1.90212e-06	up	yes
ENSGALG00000038171		ENSGALT00000079562;ENSGALT00000052298	NA	NA	NA	NA		5.05683	5.85701	1.54102	0.939558	0.364951	3.83544	1.93939	3.18912e-07	2.14293e-06	up	yes
ENSGALG00000012555	CCDC148	ENSGALT00000020503	NA	NA	NA	NA	coiled-coil domain containing 148 [Source:HGNC Symbol;Acc:HGNC:25191]	1.04224	1.67946	0	0.150603	0.203004	7.69697	2.94429	3.23786e-07	2.17128e-06	up	yes
ENSGALG00000046625		ENSGALT00000089297	NA	NA	NA	NA		1.44035	2.6698	0.074581	0.22689	0.45374	5.44239	2.44424	3.25779e-07	2.18134e-06	up	yes
ENSGALG00000044251	RASSF7	ENSGALT00000011134	GO:0005815(microtubule organizing center);GO:0070507(regulation of microtubule cytoskeleton organization);GO:0007165(signal transduction)	NA	NA	NA	Ras association domain family member 7 [Source:HGNC Symbol;Acc:HGNC:1166]	5.04242	4.10503	1.335	0.985908	2.03659	2.09924	1.06987	3.30603e-07	2.21141e-06	up	yes
ENSGALG00000002551	CFAP70	ENSGALT00000004025	GO:0070062(extracellular exosome)	NA	NA	NA	cilia and flagella associated protein 70 [Source:HGNC Symbol;Acc:HGNC:30726]	1.69829	1.15018	0.024641	0.190658	0.292263	5.61207	2.48853	3.67171e-07	2.43758e-06	up	yes
ENSGALG00000008823	IQUB	ENSGALT00000014340	GO:0031514(motile cilium);GO:0001669(acrosomal vesicle);GO:0060271(cilium assembly);GO:0007224(smoothened signaling pathway)	NA	NA	NA	IQ motif and ubiquitin domain containing [Source:HGNC Symbol;Acc:HGNC:21995]	0.739501	0.885748	0.071859	0.103432	0.210282	4.21515	2.07558	5.0809e-07	3.29724e-06	up	yes
ENSGALG00000005517	KIF9	ENSGALT00000008851	GO:0031982(vesicle);GO:0005874(microtubule);GO:0002102(podosome);GO:1903008(organelle disassembly);GO:0071801(regulation of podosome assembly);GO:0022617(extracellular matrix disassembly);GO:0046983(protein dimerization activity);GO:0005871(kinesin complex);GO:0007018(microtubule-based movement);GO:0016887(ATPase activity);GO:0003777(microtubule motor activity);GO:0008017(microtubule binding);GO:…	NA	NA	NA	kinesin family member 9 [Source:HGNC Symbol;Acc:HGNC:16666]	1.59644	1.88	0.355281	0.498815	0.585577	2.41475	1.27187	5.13071e-07	3.32631e-06	up	yes
ENSGALG00000005360	CA4	ENSGALT00000008605	GO:0070062(extracellular exosome);GO:0048471(perinuclear region of cytoplasm);GO:0046658(anchored component of plasma membrane);GO:0031526(brush border membrane);GO:0031362(anchored component of external side of plasma membrane);GO:0030667(secretory granule membrane);GO:0030658(transport vesicle membrane);GO:0016324(apical plasma membrane);GO:0016020(membrane);GO:0009986(cell surface);GO:0005886(…	00910(Nitrogen metabolism)	K18246	EC:4.2.1.1	carbonic anhydrase 4 [Source:HGNC Symbol;Acc:HGNC:1375]	1.71603	1.12611	0.180724	0.259777	0.253722	4.09399	2.03351	5.90023e-07	3.79738e-06	up	yes
ENSGALG00000014934	HS3ST1	ENSGALT00000024087	GO:0008146(sulfotransferase activity);GO:0016740(transferase activity)	00534(Glycosaminoglycan biosynthesis - heparan sulfate / heparin)	K01024	EC:2.8.2.23	heparan sulfate-glucosamine 3-sulfotransferase 1 [Source:HGNC Symbol;Acc:HGNC:5194]	3.67523	2.22876	0.872695	0.452575	0.643697	2.99852	1.58425	6.64344e-07	4.24074e-06	up	yes
ENSGALG00000033700		ENSGALT00000049160	NA	00910(Nitrogen metabolism)	K01672	EC:4.2.1.1		6.60684	10.0337	0	0.731881	0	22.7367	4.50695	6.97322e-07	4.43632e-06	up	yes
ENSGALG00000032750		ENSGALT00000071613	NA	NA	NA	NA		1.6043	1.01821	0.110264	0.429348	0.101843	4.08838	2.03153	7.85594e-07	4.964e-06	up	yes
ENSGALG00000027712		ENSGALT00000043807	GO:0016021(integral component of membrane);GO:0016020(membrane)	NA	NA	NA		3.25128	2.59624	1.06347	0.782952	0.995298	2.05774	1.04106	8.50702e-07	5.33286e-06	up	yes
ENSGALG00000012989	NINJ2	ENSGALT00000079789;ENSGALT00000083405	GO:0042246(tissue regeneration);GO:0007155(cell adhesion);GO:0016021(integral component of membrane);GO:0016020(membrane);GO:0016020(membrane)	NA	NA	NA	ninjurin 2 [Source:HGNC Symbol;Acc:HGNC:7825]	2.15385	3.40793	0.938004	0.733881	0.349714	2.75118	1.46005	9.00206e-07	5.6193e-06	up	yes
ENSGALG00000027786	SOCS3	ENSGALT00000043264	GO:0043066(negative regulation of apoptotic process);GO:0007259(JAK-STAT cascade);GO:0016567(protein ubiquitination);GO:0005622(intracellular);GO:0035556(intracellular signal transduction);GO:0001932(regulation of protein phosphorylation);GO:0009968(negative regulation of signal transduction);GO:0045595(regulation of cell differentiation);GO:0045597(positive regulation of cell differentiation);GO…	04120(Ubiquitin mediated proteolysis);04910(Insulin signaling pathway);04920(Adipocytokine signaling pathway);05164(Influenza A);05168(Herpes simplex infection)	K04696	NA	suppressor of cytokine signaling 3 [Source:HGNC Symbol;Acc:HGNC:19391]	2.54005	2.57315	1.06015	0.680047	0.644897	2.14382	1.10018	9.0587e-07	5.64934e-06	up	yes
ENSGALG00000043386	PEX5L	ENSGALT00000064159	GO:0043235(receptor complex);GO:0031267(small GTPase binding);GO:0000268(peroxisome targeting sequence binding)	04146(Peroxisome)	NA	NA	peroxisomal biogenesis factor 5 like [Source:HGNC Symbol;Acc:HGNC:30024]	2.69708	2.56241	1.10217	0.887625	0.627335	2.00964	1.00693	1.09079e-06	6.72355e-06	up	yes
ENSGALG00000025671	SCARNA1	ENSGALT00000042584	NA	NA	NA	NA	Small Cajal body specific RNA 1 [Source:RFAM;Acc:RF00553]	24.5487	33.888	12.1501	6.74627	5.89935	2.35673	1.23678	1.16548e-06	7.14745e-06	up	yes
ENSGALG00000007980	KCNG1	ENSGALT00000012958	GO:0008076(voltage-gated potassium channel complex);GO:0005886(plasma membrane);GO:0071805(potassium ion transmembrane transport);GO:0005251(delayed rectifier potassium channel activity);GO:0016021(integral component of membrane);GO:0051260(protein homooligomerization);GO:0005249(voltage-gated potassium channel activity);GO:0034765(regulation of ion transmembrane transport);GO:0005244(voltage-gat…	NA	NA	NA	potassium voltage-gated channel modifier subfamily G member 1 [Source:HGNC Symbol;Acc:HGNC:6248]	1.6191	3.02788	0.644637	0.771075	0.738297	2.15736	1.10927	1.21032e-06	7.40193e-06	up	yes
ENSGALG00000004083	GRIA1	ENSGALT00000057217;ENSGALT00000006493	GO:0055037(recycling endosome);GO:0014069(postsynaptic density);GO:0005886(plasma membrane);GO:0030425(dendrite);GO:0043197(dendritic spine);GO:0005783(endoplasmic reticulum);GO:0009986(cell surface);GO:0016020(membrane);GO:0043025(neuronal cell body);GO:0043005(neuron projection);GO:0007268(chemical synaptic transmission);GO:0036477(somatodendritic compartment);GO:0045202(synapse);GO:0031623(rec…	04080(Neuroactive ligand-receptor interaction);04080(Neuroactive ligand-receptor interaction)	K05197	NA	glutamate ionotropic receptor AMPA type subunit 1 [Source:HGNC Symbol;Acc:HGNC:4571]	1.38875	1.14435	0.292445	0.51552	0.34049	2.20567	1.14121	1.42058e-06	8.60451e-06	up	yes
ENSGALG00000041755		ENSGALT00000075576	NA	NA	NA	NA		2.89767	1.44273	0.629714	0.523412	0.281929	3.02456	1.59672	1.53099e-06	9.19355e-06	up	yes
ENSGALG00000031350	KCNE4	ENSGALT00000076883	NA	NA	NA	NA	potassium voltage-gated channel subfamily E regulatory subunit 4 [Source:HGNC Symbol;Acc:HGNC:6244]	11.153	9.65287	3.36334	2.04622	4.51543	2.09631	1.06785	2.10712e-06	1.24228e-05	up	yes
ENSGALG00000013747	TAGAP	ENSGALT00000022338	GO:0007165(signal transduction)	NA	NA	NA	T-cell activation RhoGTPase activating protein [Source:HGNC Symbol;Acc:HGNC:15669]	2.22471	3.76812	0.459328	1.28907	0.447376	2.72925	1.44851	2.62476e-06	1.52243e-05	up	yes
ENSGALG00000027374	KLF13	ENSGALT00000043393	GO:0003676(nucleic acid binding)	NA	NA	NA	Kruppel like factor 13 [Source:HGNC Symbol;Acc:HGNC:13672]	3.02507	1.61583	0.357393	0	0	12.9854	3.69882	2.64664e-06	1.53311e-05	up	yes
ENSGALG00000021074	MYOC	ENSGALT00000033904	GO:0070062(extracellular exosome);GO:0033268(node of Ranvier);GO:0031410(cytoplasmic vesicle);GO:0031012(extracellular matrix);GO:0005794(Golgi apparatus);GO:0005783(endoplasmic reticulum);GO:0005758(mitochondrial intermembrane space);GO:0005743(mitochondrial inner membrane);GO:0005741(mitochondrial outer membrane);GO:0005615(extracellular space);GO:1900026(positive regulation of substrate adhesi…	NA	NA	NA	myocilin [Source:HGNC Symbol;Acc:HGNC:7610]	2.76105	1.89282	0.817993	0.317751	0.559797	2.74477	1.45669	2.79645e-06	1.61425e-05	up	yes
ENSGALG00000029245	SPATA46	ENSGALT00000047297	NA	NA	NA	NA	spermatogenesis associated 46 [Source:HGNC Symbol;Acc:HGNC:27648]	3.73178	4.39521	1.49658	0.518883	0.618378	3.08561	1.62556	2.89409e-06	1.66699e-05	up	yes
ENSGALG00000016362	SH3YL1	ENSGALT00000026394	GO:0032587(ruffle membrane);GO:1900027(regulation of ruffle assembly);GO:0006661(phosphatidylinositol biosynthetic process);GO:0035091(phosphatidylinositol binding);GO:0019902(phosphatase binding)	NA	NA	NA	SH3 and SYLF domain containing 1 [Source:HGNC Symbol;Acc:HGNC:29546]	3.47852	3.28297	1.21667	0.727232	1.07617	2.23886	1.16276	2.9163e-06	1.6776e-05	up	yes
ENSGALG00000004078		ENSGALT00000006484	GO:0032436(positive regulation of proteasomal ubiquitin-dependent protein catabolic process);GO:0000209(protein polyubiquitination);GO:0031624(ubiquitin conjugating enzyme binding);GO:0061630(ubiquitin protein ligase activity);GO:0005622(intracellular);GO:0046872(metal ion binding)	NA	NA	NA		3.41669	3.35059	0.53751	0.066169	0	11.21	3.48672	2.92804e-06	1.68362e-05	up	yes
ENSGALG00000042103	C11orf96	ENSGALT00000079511	NA	NA	NA	NA	chromosome 11 open reading frame 96 [Source:HGNC Symbol;Acc:HGNC:38675]	4.50785	5.63002	1.14805	2.21488	1.6564	2.01976	1.01419	3.1101e-06	1.77779e-05	up	yes
ENSGALG00000046192		ENSGALT00000088864	NA	NA	NA	NA		0.696982	0.939398	0.14511	0.20154	0.092597	3.72542	1.8974	3.12557e-06	1.7856e-05	up	yes
ENSGALG00000028560		ENSGALT00000044491	GO:0005576(extracellular region);GO:0005509(calcium ion binding)	NA	NA	NA		1.29649	1.28079	0	0	0.255446	10.0893	3.33476	3.16756e-06	1.80648e-05	up	yes
ENSGALG00000009095		ENSGALT00000014806	GO:0005887(integral component of plasma membrane);GO:0005886(plasma membrane);GO:0090030(regulation of steroid hormone biosynthetic process);GO:0072520(seminiferous tubule development);GO:0071371(cellular response to gonadotropin stimulus);GO:0060065(uterus development);GO:0046544(development of secondary male sexual characteristics);GO:0043950(positive regulation of cAMP-mediated signaling);GO:0…	04020(Calcium signaling pathway);04080(Neuroactive ligand-receptor interaction)	K04248	NA		0.470563	0.765992	0.142326	0.092967	0.123637	3.44511	1.78455	3.73826e-06	2.10749e-05	up	yes
ENSGALG00000017317	DNAJB13	ENSGALT00000027986;ENSGALT00000050721	GO:0036126(sperm flagellum);GO:0031514(motile cilium);GO:0005930(axoneme);GO:0005737(cytoplasm);GO:1904158(axonemal central apparatus assembly);GO:0051082(unfolded protein binding);GO:0006457(protein folding);GO:0006457(protein folding)	NA	NA	NA	DnaJ heat shock protein family (Hsp40) member B13 [Source:HGNC Symbol;Acc:HGNC:30718]	1.42027	1.64163	0.505517	0.309702	0.355415	2.61559	1.38714	4.04866e-06	2.26995e-05	up	yes
ENSGALG00000012538	NR4A2	ENSGALT00000073703;ENSGALT00000020478;ENSGALT00000046347	GO:0046982(protein heterodimerization activity);GO:0005634(nucleus);GO:0006351(transcription, DNA-templated);GO:0001077(transcriptional activator activity, RNA polymerase II core promoter proximal region sequence-specific binding);GO:0003677(DNA binding);GO:0045944(positive regulation of transcription from RNA polymerase II promoter);GO:0001764(neuron migration);GO:0016607(nuclear speck);GO:00097…	NA	NA	NA	nuclear receptor subfamily 4 group A member 2 [Source:HGNC Symbol;Acc:HGNC:7981]	0.457597	0.429337	0.0706305	0.154176	0.0703549	3.00491	1.58732	4.2648e-06	2.38408e-05	up	yes
ENSGALG00000016364	ALKAL2	ENSGALT00000070844	GO:0010976(positive regulation of neuron projection development);GO:0070374(positive regulation of ERK1 and ERK2 cascade);GO:0030971(receptor tyrosine kinase binding);GO:0030298(receptor signaling protein tyrosine kinase activator activity);GO:0070378(positive regulation of ERK5 cascade)	NA	NA	NA	ALK and LTK ligand 2 [Source:HGNC Symbol;Acc:HGNC:27683]	2.7618	2.51758	0.352517	0.688123	0.187661	4.29812	2.1037	4.28584e-06	2.39484e-05	up	yes
ENSGALG00000005031	DRP2	ENSGALT00000008061;ENSGALT00000075548;ENSGALT00000054612;ENSGALT00000082005	GO:0005886(plasma membrane);GO:0046872(metal ion binding);GO:0008270(zinc ion binding);GO:0008270(zinc ion binding)	NA	NA	NA	dystrophin related protein 2 [Source:HGNC Symbol;Acc:HGNC:3032]	1.38598	1.09539	0.211065	0.326719	0.0327907	4.34891	2.12065	4.91067e-06	2.7154e-05	up	yes
ENSGALG00000016054	KCNJ6	ENSGALT00000025867	GO:0005886(plasma membrane);GO:0005794(Golgi apparatus);GO:0015467(G-protein activated inward rectifier potassium channel activity);GO:0010107(potassium ion import);GO:0005242(inward rectifier potassium channel activity);GO:0034765(regulation of ion transmembrane transport);GO:0005244(voltage-gated ion channel activity);GO:0006813(potassium ion transport);GO:0006811(ion transport);GO:0006810(tran…	NA	NA	NA	potassium voltage-gated channel subfamily J member 6 [Source:HGNC Symbol;Acc:HGNC:6267]	2.48516	3.54389	0.72711	0.98659	1.15339	2.10285	1.07234	5.76032e-06	3.1446e-05	up	yes
ENSGALG00000015253	COL8A1	ENSGALT00000024611	GO:0070062(extracellular exosome);GO:0031012(extracellular matrix);GO:0005615(extracellular space);GO:0050673(epithelial cell proliferation);GO:0048593(camera-type eye morphogenesis);GO:0035987(endodermal cell differentiation);GO:0010811(positive regulation of cell-substrate adhesion);GO:0005581(collagen trimer);GO:0005576(extracellular region)	NA	NA	NA	collagen type VIII alpha 1 chain [Source:HGNC Symbol;Acc:HGNC:2215]	4.69987	5.39761	0.721371	2.7934	0.622041	2.44088	1.2874	6.3717e-06	3.45561e-05	up	yes
ENSGALG00000030545	SLC35D3	ENSGALT00000056728	GO:0005783(endoplasmic reticulum);GO:0005769(early endosome);GO:0070863(positive regulation of protein exit from endoplasmic reticulum);GO:0097009(energy homeostasis)	NA	NA	NA	solute carrier family 35 member D3 [Source:HGNC Symbol;Acc:HGNC:15621]	0.862621	1.54426	0.174539	0.145641	0.320042	3.75945	1.91052	6.57238e-06	3.55428e-05	up	yes
ENSGALG00000016426	MAP3K15	ENSGALT00000026498	GO:0000186(activation of MAPKK activity);GO:0004709(MAP kinase kinase kinase activity);GO:0000165(MAPK cascade);GO:0005622(intracellular);GO:0006468(protein phosphorylation);GO:0016740(transferase activity);GO:0005524(ATP binding);GO:0004672(protein kinase activity);GO:0000166(nucleotide binding);GO:0016310(phosphorylation);GO:0016301(kinase activity)	NA	NA	NA	mitogen-activated protein kinase kinase kinase 15 [Source:HGNC Symbol;Acc:HGNC:31689]	2.79585	3.78965	0.6801	1.6407	0.295651	2.51696	1.33168	7.13458e-06	3.83954e-05	up	yes
ENSGALG00000005842	GDPD2	ENSGALT00000050305	GO:0005886(plasma membrane);GO:0045669(positive regulation of osteoblast differentiation);GO:0030027(lamellipodium);GO:0090527(actin filament reorganization);GO:0005884(actin filament)	NA	NA	NA	glycerophosphodiester phosphodiesterase domain containing 2 [Source:HGNC Symbol;Acc:HGNC:25974]	1.08148	0.664474	0.133491	0.244923	0.131216	3.42592	1.77649	8.5501e-06	4.54585e-05	up	yes
ENSGALG00000018287	gga-mir-133a-1	ENSGALT00000028994	NA	NA	NA	NA	gga-mir-133a-1 [Source:miRBase;Acc:MI0001195]	40.57	51.2415	12.3383	13.3002	19.7551	2.02257	1.01619	8.55323e-06	4.54585e-05	up	yes
ENSGALG00000020895		ENSGALT00000033520	NA	NA	NA	NA		0.481737	0.943019	0.019239	0.092825	0.184876	4.79813	2.26247	1.0168e-05	5.33993e-05	up	yes
ENSGALG00000006519	KIAA1024	ENSGALT00000010531	GO:0016021(integral component of membrane);GO:0016020(membrane)	NA	NA	NA	KIAA1024 [Source:HGNC Symbol;Acc:HGNC:29172]	1.31149	1.02589	0.236717	0.046037	0	8.26648	3.04727	1.21693e-05	6.30856e-05	up	yes
ENSGALG00000004343		ENSGALT00000006930;ENSGALT00000080293	GO:0006572(tyrosine catabolic process);GO:0003868(4-hydroxyphenylpyruvate dioxygenase activity);GO:0009072(aromatic amino acid family metabolic process);GO:0016701(oxidoreductase activity, acting on single donors with incorporation of molecular oxygen);GO:0005789(endoplasmic reticulum membrane);GO:0000139(Golgi membrane);GO:0046872(metal ion binding);GO:0055114(oxidation-reduction process);GO:005…	00350(Tyrosine metabolism);00360(Phenylalanine metabolism);00130(Ubiquinone and other terpenoid-quinone biosynthesis);00130(Ubiquinone and other terpenoid-quinone biosynthesis)	K00457	EC:1.13.11.27		2.3793	2.72043	0.587128	0.456533	1.22789	2.24505	1.16675	1.24152e-05	6.42096e-05	up	yes
ENSGALG00000025577	gga-mir-1794	ENSGALT00000042490	NA	NA	NA	NA	gga-mir-1794 [Source:miRBase;Acc:MI0007537]	14.0551	16.5484	0.359082	4.32355	0.87444	5.50714	2.4613	1.28389e-05	6.61948e-05	up	yes
ENSGALG00000026207	CNTF	ENSGALT00000043216	GO:0097058(CRLF-CLCF1 complex);GO:0005615(extracellular space);GO:0070120(ciliary neurotrophic factor-mediated signaling pathway);GO:0048680(positive regulation of axon regeneration);GO:0048666(neuron development);GO:0048644(muscle organ morphogenesis);GO:0048143(astrocyte activation);GO:0046668(regulation of retinal cell programmed cell death);GO:0046533(negative regulation of photoreceptor cell…	04060(Cytokine-cytokine receptor interaction)	K05420	NA	ciliary neurotrophic factor [Source:HGNC Symbol;Acc:HGNC:2169]	0.831229	1.18749	0.115501	0.20301	0.308457	3.21981	1.68697	1.43093e-05	7.32353e-05	up	yes
ENSGALG00000013293	GLDN	ENSGALT00000031337;ENSGALT00000063580	GO:0005886(plasma membrane);GO:0005615(extracellular space);GO:0045162(clustering of voltage-gated sodium channels);GO:0034113(heterotypic cell-cell adhesion);GO:0032528(microvillus organization);GO:0086080(protein binding involved in heterotypic cell-cell adhesion);GO:0086080(protein binding involved in heterotypic cell-cell adhesion)	NA	NA	NA	gliomedin [Source:HGNC Symbol;Acc:HGNC:29514]	2.47019	2.62712	0.353187	0.355989	1.13616	2.76226	1.46585	1.46104e-05	7.46038e-05	up	yes
ENSGALG00000001115	MMEL1	ENSGALT00000001683	GO:0008237(metallopeptidase activity);GO:0004222(metalloendopeptidase activity);GO:0006508(proteolysis);GO:0016021(integral component of membrane);GO:0016020(membrane)	NA	NA	NA	membrane metalloendopeptidase like 1 [Source:HGNC Symbol;Acc:HGNC:14668]	0.677671	2.25542	0.338389	0.124944	0.40657	3.37175	1.7535	1.51702e-05	7.72542e-05	up	yes
ENSGALG00000020876		ENSGALT00000013331;ENSGALT00000055277	GO:0009115(xanthine catabolic process);GO:0051537(2 iron, 2 sulfur cluster binding);GO:0016903(oxidoreductase activity, acting on the aldehyde or oxo group of donors);GO:0004854(xanthine dehydrogenase activity);GO:0050660(flavin adenine dinucleotide binding);GO:0051287(NAD binding);GO:0016614(oxidoreductase activity, acting on CH-OH group of donors);GO:0009055(electron carrier activity);GO:000582…	00280(Valine, leucine and isoleucine degradation);00350(Tyrosine metabolism);00380(Tryptophan metabolism);00750(Vitamin B6 metabolism);00760(Nicotinate and nicotinamide metabolism);00830(Retinol metabolism);00982(Drug metabolism - cytochrome P450);00982(Drug metabolism - cytochrome P450)	K00157	EC:1.2.3.1		2.19539	1.61059	0.497869	0.978172	0.219758	2.24436	1.1663	1.52194e-05	7.74746e-05	up	yes
ENSGALG00000021686		ENSGALT00000035196	GO:0071901(negative regulation of protein serine/threonine kinase activity);GO:0006469(negative regulation of protein kinase activity);GO:0004862(cAMP-dependent protein kinase inhibitor activity)	NA	NA	NA		2.12836	15.5946	2.88249	1.44872	1.27792	3.15966	1.65977	1.65984e-05	8.41077e-05	up	yes
ENSGALG00000013568	NR4A3	ENSGALT00000055769;ENSGALT00000022087	GO:0005667(transcription factor complex);GO:2000505(regulation of energy homeostasis);GO:2000253(positive regulation of feeding behavior);GO:2000108(positive regulation of leukocyte apoptotic process);GO:1903208(negative regulation of hydrogen peroxide-induced neuron death);GO:1903204(negative regulation of oxidative stress-induced neuron death);GO:1900625(positive regulation of monocyte aggregat…	NA	NA	NA	nuclear receptor subfamily 4 group A member 3 [Source:HGNC Symbol;Acc:HGNC:7982]	2.08855	3.16945	1.27366	0.425388	0.713615	2.17933	1.12388	1.87322e-05	9.38446e-05	up	yes
ENSGALG00000031432		ENSGALT00000071698	NA	NA	NA	NA		0.800673	0.889177	0.170854	0.101899	0.286493	3.02166	1.59534	2.04268e-05	0.000101568	up	yes
ENSGALG00000005934		ENSGALT00000086944;ENSGALT00000009549	GO:0043252(sodium-independent organic anion transport);GO:0022857(transmembrane transporter activity);GO:0015347(sodium-independent organic anion transmembrane transporter activity);GO:0005452(inorganic anion exchanger activity);GO:0015698(inorganic anion transport);GO:0005887(integral component of plasma membrane);GO:0055085(transmembrane transport);GO:0016021(integral component of membrane);GO:…	NA	NA	NA		1.2596	0.834124	0.298644	0.270511	0.301329	2.40524	1.26618	2.4647e-05	0.000120653	up	yes
ENSGALG00000045312	SEMA6C	ENSGALT00000084299	NA	NA	NA	NA	semaphorin 6C [Source:HGNC Symbol;Acc:HGNC:10740]	1.28631	1.08465	0.454659	0.148026	0.377855	2.41802	1.27383	2.56113e-05	0.00012505	up	yes
ENSGALG00000033034	SLC25A34	ENSGALT00000057880	GO:0005739(mitochondrion)	NA	NA	NA	solute carrier family 25 member 34 [Source:HGNC Symbol;Acc:HGNC:27653]	4.0881	4.02557	1.27485	0.812499	1.76804	2.1045	1.07348	3.24112e-05	0.000155393	up	yes
ENSGALG00000000824		ENSGALT00000001199	GO:0006468(protein phosphorylation);GO:0005524(ATP binding);GO:0004674(protein serine/threonine kinase activity);GO:0004672(protein kinase activity);GO:0000166(nucleotide binding)	04371(Apelin signaling pathway);04020(Calcium signaling pathway);04510(Focal adhesion);04810(Regulation of actin cytoskeleton);04270(Vascular smooth muscle contraction)	K00907	EC:2.7.11.18		0.644418	0.882931	0.24703	0.133438	0.171918	2.765	1.46728	3.24535e-05	0.00015554	up	yes
ENSGALG00000006175	DPEP1	ENSGALT00000048861;ENSGALT00000009970	GO:0016805(dipeptidase activity);GO:0008239(dipeptidyl-peptidase activity);GO:0008235(metalloexopeptidase activity);GO:0008237(metallopeptidase activity);GO:0006508(proteolysis);GO:0031225(anchored component of membrane);GO:0016787(hydrolase activity);GO:0008233(peptidase activity);GO:0046872(metal ion binding);GO:0016020(membrane);GO:0043027(cysteine-type endopeptidase inhibitor activity involve…	NA	NA	NA	dipeptidase 1 [Source:HGNC Symbol;Acc:HGNC:3002]	1.55855	1.46718	0.436518	0.566969	0.492275	2.02287	1.0164	3.80378e-05	0.00017958	up	yes
ENSGALG00000016157	UMODL1	ENSGALT00000036707	GO:0009897(external side of plasma membrane);GO:0005615(extracellular space);GO:2000354(regulation of ovarian follicle development);GO:0097211(cellular response to gonadotropin-releasing hormone);GO:0060612(adipose tissue development);GO:0048609(multicellular organismal reproductive process);GO:0042981(regulation of apoptotic process);GO:0010468(regulation of gene expression);GO:0007338(single fe…	NA	NA	NA	uromodulin like 1 [Source:HGNC Symbol;Acc:HGNC:12560]	0.626643	0.359063	0.165509	0.132564	0.125235	2.32858	1.21945	3.95703e-05	0.000186245	up	yes
ENSGALG00000037687	GRHL2	ENSGALT00000067611;ENSGALT00000075366	GO:0043565(sequence-specific DNA binding);GO:0005911(cell-cell junction);GO:0008283(cell proliferation);GO:0031490(chromatin DNA binding);GO:0045944(positive regulation of transcription from RNA polymerase II promoter);GO:0007155(cell adhesion);GO:0005634(nucleus);GO:0005654(nucleoplasm);GO:0003677(DNA binding);GO:0001843(neural tube closure);GO:0006355(regulation of transcription, DNA-templated)…	NA	NA	NA	grainyhead like transcription factor 2 [Source:HGNC Symbol;Acc:HGNC:2799]	1.05933	0.865775	0.15554	0.371274	0.200656	2.64631	1.40398	4.03372e-05	0.000189425	up	yes
ENSGALG00000035827		ENSGALT00000076529	NA	NA	NA	NA		1.46352	3.49018	0.893546	0.61863	0.255482	2.80241	1.48667	4.30109e-05	0.000200914	up	yes
ENSGALG00000046034		ENSGALT00000089561	NA	NA	NA	NA		2.6013	2.98983	1.07598	0.322509	0.817993	2.52252	1.33487	4.894e-05	0.000225821	up	yes
ENSGALG00000009468		ENSGALT00000015414	NA	NA	NA	NA		9.64817	5.96586	0	0	1.02585	15.2206	3.92795	4.97177e-05	0.000228781	up	yes
ENSGALG00000022875		ENSGALT00000083159;ENSGALT00000029656;ENSGALT00000053681;ENSGALT00000089776	GO:0016021(integral component of membrane);GO:0016020(membrane);GO:0016020(membrane)	NA	NA	NA		0.957382	1.12213	0.224413	0.410066	0.240637	2.37627	1.2487	5.75465e-05	0.000261541	up	yes
ENSGALG00000010342		ENSGALT00000017091	GO:0046373(L-arabinose metabolic process);GO:0046556(alpha-L-arabinofuranosidase activity);GO:0007605(sensory perception of sound);GO:0005576(extracellular region)	NA	NA	NA		0.333658	0.244465	0.125142	0.030866	0.030146	3.10562	1.63488	6.1301e-05	0.000277275	up	yes
ENSGALG00000041282		ENSGALT00000047064	NA	NA	NA	NA		8.51329	5.87847	3.08214	2.43087	1.47175	2.06045	1.04296	7.21586e-05	0.000321888	up	yes
ENSGALG00000006471	SLCO2A1	ENSGALT00000010452	GO:0015732(prostaglandin transport);GO:0015132(prostaglandin transmembrane transporter activity);GO:0006811(ion transport);GO:0006810(transport);GO:0005886(plasma membrane);GO:0005215(transporter activity);GO:0055085(transmembrane transport);GO:0016021(integral component of membrane);GO:0016020(membrane)	NA	NA	NA	solute carrier organic anion transporter family member 2A1 [Source:HGNC Symbol;Acc:HGNC:10955]	0.968676	1.31273	0.253891	0.532847	0.167254	2.39143	1.25787	8.05641e-05	0.000356151	up	yes
ENSGALG00000000123		ENSGALT00000056834;ENSGALT00000000172	NA	NA	NA	NA		0.590922	0.977215	0	0.229921	0.0997718	4.75636	2.24986	0.000110607	0.000475037	up	yes
ENSGALG00000026912		ENSGALT00000043030	GO:0051607(defense response to virus);GO:0045087(innate immune response);GO:0043330(response to exogenous dsRNA);GO:0042100(B cell proliferation);GO:0033141(positive regulation of peptidyl-serine phosphorylation of STAT protein);GO:0030183(B cell differentiation);GO:0006959(humoral immune response);GO:0019221(cytokine-mediated signaling pathway);GO:0002323(natural killer cell activation involved …	NA	NA	NA		2.01443	2.23796	0.650675	0.504212	0.67088	2.3291	1.21977	0.000111711	0.000479469	up	yes
ENSGALG00000031707	DHH	ENSGALT00000077747	GO:0005509(calcium ion binding);GO:0008270(zinc ion binding);GO:0001649(osteoblast differentiation);GO:0007286(spermatid development);GO:0007224(smoothened signaling pathway);GO:0030238(male sex determination);GO:0005113(patched binding);GO:0033327(Leydig cell differentiation);GO:0050810(regulation of steroid biosynthetic process)	NA	NA	NA	desert hedgehog [Source:HGNC Symbol;Acc:HGNC:2865]	1.18534	1.04722	0	0.093126	0.362303	4.90211	2.2934	0.000113297	0.000485648	up	yes
ENSGALG00000037011	CILP2	ENSGALT00000058548	GO:0070062(extracellular exosome)	NA	NA	NA	cartilage intermediate layer protein 2 [Source:HGNC Symbol;Acc:HGNC:24213]	1.83008	1.88077	0.397636	0.529416	0.01933	3.9211	1.97126	0.000114507	0.000490359	up	yes
ENSGALG00000040644	C8G	ENSGALT00000046644	GO:0070062(extracellular exosome);GO:0072562(blood microparticle)	NA	NA	NA	complement C8 gamma chain [Source:HGNC Symbol;Acc:HGNC:1354]	3.97306	3.1996	0.324342	1.10007	1.49596	2.45608	1.29636	0.000130489	0.000551987	up	yes
ENSGALG00000042961		ENSGALT00000073474	NA	NA	NA	NA		0.991504	1.20394	0.539585	0.27914	0.192479	2.17112	1.11844	0.000132261	0.000558279	up	yes
ENSGALG00000034322		ENSGALT00000068731	NA	NA	NA	NA		3.68198	2.35263	0.757095	1.02948	1.14353	2.05952	1.04231	0.000132872	0.000560505	up	yes
ENSGALG00000041830		ENSGALT00000073555	NA	NA	NA	NA		2.73942	2.43213	0.199727	0.908684	0.861221	2.62564	1.39267	0.00013569	0.0005713	up	yes
ENSGALG00000046293		ENSGALT00000086374	NA	NA	NA	NA		3.84728	2.53033	1.29774	0.984534	0.256239	2.51234	1.32903	0.000144241	0.000604048	up	yes
ENSGALG00000007210		ENSGALT00000032358	GO:0051726(regulation of cell cycle)	NA	NA	NA		5.67591	5.13367	2.62757	0.594168	1.43224	2.32266	1.21578	0.000157316	0.000654257	up	yes
ENSGALG00000016361	FAM110C	ENSGALT00000026392	GO:0005938(cell cortex);GO:0060491(regulation of cell projection assembly);GO:0051897(positive regulation of protein kinase B signaling);GO:0030335(positive regulation of cell migration);GO:0043014(alpha-tubulin binding)	NA	NA	NA	family with sequence similarity 110 member C [Source:HGNC Symbol;Acc:HGNC:33340]	1.40431	1.24214	0.526994	0.117777	0.39784	2.53829	1.34386	0.000204577	0.000829496	up	yes
ENSGALG00000042317	P2RY2	ENSGALT00000074479	NA	04080(Neuroactive ligand-receptor interaction)	K04269	NA	purinergic receptor P2Y2 [Source:HGNC Symbol;Acc:HGNC:8541]	4.14201	3.99511	2.19027	0.855803	0.416446	2.35006	1.2327	0.000210888	0.00085222	up	yes
ENSGALG00000036306		ENSGALT00000061680	NA	NA	NA	NA		0.622095	0.597938	0.222359	0.212148	0.13225	2.15266	1.10612	0.000227725	0.000913917	up	yes
ENSGALG00000005537	ASB14	ENSGALT00000008882	GO:0000151(ubiquitin ligase complex);GO:0004842(ubiquitin-protein transferase activity);GO:0031625(ubiquitin protein ligase binding);GO:0016567(protein ubiquitination);GO:0005634(nucleus);GO:0005737(cytoplasm);GO:0035556(intracellular signal transduction)	NA	NA	NA	ankyrin repeat and SOCS box containing 14 [Source:HGNC Symbol;Acc:HGNC:19766]	4.78132	3.18599	0.827383	1.92059	0.290001	2.62257	1.39098	0.000229928	0.000921864	up	yes
ENSGALG00000025887	ATF3	ENSGALT00000043027	GO:0006357(regulation of transcription from RNA polymerase II promoter);GO:0003700(transcription factor activity, sequence-specific DNA binding);GO:0006355(regulation of transcription, DNA-templated);GO:0005634(nucleus);GO:0003677(DNA binding);GO:0000976(transcription regulatory region sequence-specific DNA binding);GO:0000977(RNA polymerase II regulatory region sequence-specific DNA binding);GO:…	NA	NA	NA	activating transcription factor 3 [Source:HGNC Symbol;Acc:HGNC:785]	7.7198	3.79717	3.02075	0.97924	0.994822	2.30578	1.20526	0.000237583	0.000948544	up	yes
ENSGALG00000014515	C1QTNF7	ENSGALT00000023428	GO:0005581(collagen trimer);GO:0005576(extracellular region)	NA	NA	NA	C1q and TNF related 7 [Source:HGNC Symbol;Acc:HGNC:14342]	2.7011	3.52493	0	0.699013	0.733243	4.34701	2.12002	0.000261241	0.00103275	up	yes
ENSGALG00000039245		ENSGALT00000081690	NA	NA	NA	NA		1.60384	1.79279	0.09931	0.736463	0.470719	2.59981	1.37841	0.000270778	0.00106727	up	yes
ENSGALG00000007320	FXYD2	ENSGALT00000011839	GO:0016020(membrane);GO:2000649(regulation of sodium ion transmembrane transporter activity);GO:0017080(sodium channel regulator activity);GO:0034220(ion transmembrane transport);GO:0006811(ion transport);GO:0005216(ion channel activity);GO:0016021(integral component of membrane);GO:0070062(extracellular exosome)	04260(Cardiac muscle contraction);04261(Adrenergic signaling in cardiomyocytes)	K01538	NA	sodium/potassium-transporting ATPase subunit gamma [Source:RefSeq peptide;Acc:NP_001289113]	2.59174	3.66789	1.40794	0.663509	0.532254	2.40413	1.26551	0.000295438	0.00115418	up	yes
ENSGALG00000011225	SLC25A47	ENSGALT00000032511	GO:0005739(mitochondrion);GO:0022857(transmembrane transporter activity);GO:0005743(mitochondrial inner membrane);GO:0006839(mitochondrial transport);GO:0016021(integral component of membrane);GO:0055085(transmembrane transport);GO:0006810(transport);GO:0016020(membrane)	NA	NA	NA	solute carrier family 25 member 47 [Source:HGNC Symbol;Acc:HGNC:20115]	1.81688	2.19538	0.106501	0.696932	0.650112	2.76033	1.46484	0.000297778	0.0011623	up	yes
ENSGALG00000005007		ENSGALT00000054344;ENSGALT00000069620;ENSGALT00000008018;ENSGALT00000070459	GO:0016311(dephosphorylation);GO:0035335(peptidyl-tyrosine dephosphorylation);GO:0006470(protein dephosphorylation);GO:0016791(phosphatase activity);GO:0008138(protein tyrosine/serine/threonine phosphatase activity);GO:0004725(protein tyrosine phosphatase activity);GO:0004725(protein tyrosine phosphatase activity)	NA	NA	NA		2.23869	2.74194	0.42063	1.40356	0.637009	2.02366	1.01696	0.000307537	0.00119722	up	yes
ENSGALG00000003403	ZNF385C	ENSGALT00000005381;ENSGALT00000068205;ENSGALT00000078970	GO:0003723(RNA binding);GO:0072332(intrinsic apoptotic signaling pathway by p53 class mediator);GO:0002039(p53 binding);GO:0005622(intracellular);GO:0003676(nucleic acid binding);GO:0046872(metal ion binding);GO:0008270(zinc ion binding);GO:0008270(zinc ion binding)	NA	NA	NA	zinc finger protein 385C [Source:HGNC Symbol;Acc:HGNC:33722]	0.639369	0.790954	0.1022	0.0761312	0.352322	2.6954	1.4305	0.00032933	0.00127533	up	yes
ENSGALG00000039334		ENSGALT00000052081	NA	NA	NA	NA		2.39386	1.32367	0	0.148828	0.665481	4.56525	2.1907	0.000334935	0.00129439	up	yes
ENSGALG00000000251	CD79B	ENSGALT00000000330	GO:0050853(B cell receptor signaling pathway);GO:0009897(external side of plasma membrane);GO:0030183(B cell differentiation);GO:0007166(cell surface receptor signaling pathway);GO:0004888(transmembrane signaling receptor activity);GO:0005737(cytoplasm);GO:0005887(integral component of plasma membrane);GO:0016021(integral component of membrane);GO:0016020(membrane);GO:0005654(nucleoplasm);GO:0005…	NA	NA	NA	CD79b molecule [Source:HGNC Symbol;Acc:HGNC:1699]	1.00311	0.796059	0.14416	0.236091	0.423898	2.23736	1.1618	0.000348478	0.00134048	up	yes
ENSGALG00000043839	SPACA1	ENSGALT00000087741	NA	NA	NA	NA	sperm acrosome associated 1 [Source:HGNC Symbol;Acc:HGNC:14967]	4.02927	1.65406	1.14629	1.07586	0.450728	2.12629	1.08834	0.000438801	0.00165483	up	yes
ENSGALG00000041360		ENSGALT00000055287	NA	NA	NA	NA		1.35991	1.33988	0.177603	0.631797	0.241949	2.56793	1.36061	0.000440065	0.00165912	up	yes
ENSGALG00000042446	ACSM5	ENSGALT00000053520	NA	00650(Butanoate metabolism)	K01896	EC:6.2.1.2	acyl-CoA synthetase medium chain family member 5 [Source:HGNC Symbol;Acc:HGNC:26060]	1.13932	2.60881	0.795877	0.63504	0.144996	2.37839	1.24998	0.000492547	0.00183201	up	yes
ENSGALG00000023531	LEKR1	ENSGALT00000039074;ENSGALT00000044799	NA	NA	NA	NA	leucine, glutamate and lysine rich 1 [Source:HGNC Symbol;Acc:HGNC:33765]	0.812271	0.845127	0	0.331108	0.0626811	4.20884	2.07342	0.000510488	0.00189026	up	yes
ENSGALG00000036327	NGEF	ENSGALT00000059767;ENSGALT00000077073;ENSGALT00000049492	GO:0035023(regulation of Rho protein signal transduction);GO:0005089(Rho guanyl-nucleotide exchange factor activity);GO:0065009(regulation of molecular function);GO:0065009(regulation of molecular function)	NA	NA	NA	neuronal guanine nucleotide exchange factor [Source:HGNC Symbol;Acc:HGNC:7807]	0.867689	0.67032	0.238526	0.391058	0.0715661	2.19355	1.13327	0.000519664	0.00191942	up	yes
ENSGALG00000030774		ENSGALT00000078377	NA	NA	NA	NA		0.770798	0.893349	0.104471	0.093959	0.412877	2.72228	1.44481	0.000539405	0.0019813	up	yes
ENSGALG00000001716	C15orf59	ENSGALT00000002633	NA	NA	NA	NA	chromosome 15 open reading frame 59 [Source:HGNC Symbol;Acc:HGNC:33753]	1.62619	1.88552	0.959638	0.162623	0.158476	2.74194	1.4552	0.000553187	0.00202968	up	yes
ENSGALG00000041729		ENSGALT00000074092	NA	NA	NA	NA		3.0478	4.37599	0.372452	1.20329	1.73124	2.24489	1.16665	0.000590193	0.00215177	up	yes
ENSGALG00000035854		ENSGALT00000072280	NA	NA	NA	NA		0.53663	0.44747	0.232353	0.017288	0.067538	3.10266	1.63351	0.000600533	0.00218767	up	yes
ENSGALG00000041187		ENSGALT00000076332;ENSGALT00000078794	NA	NA	NA	NA		3.70599	4.00532	1.7499	1.69448	0.22999	2.09867	1.06948	0.000701585	0.00251118	up	yes
ENSGALG00000010029	BEST3	ENSGALT00000016288	GO:0043271(negative regulation of ion transport);GO:0015698(inorganic anion transport);GO:0005254(chloride channel activity);GO:0034707(chloride channel complex);GO:0006821(chloride transport);GO:1902476(chloride transmembrane transport);GO:0006811(ion transport);GO:0006810(transport);GO:0005886(plasma membrane);GO:0016021(integral component of membrane);GO:0016020(membrane)	NA	NA	NA	bestrophin 3 [Source:HGNC Symbol;Acc:HGNC:17105]	1.58238	1.56525	0.830815	0.082914	0.30433	2.58413	1.36968	0.000720892	0.00257384	up	yes
ENSGALG00000004734		ENSGALT00000007539	GO:0030246(carbohydrate binding)	NA	NA	NA		0.994128	0.812727	0.373299	0.095715	0	3.85245	1.94578	0.000824899	0.0029084	up	yes
ENSGALG00000016723		ENSGALT00000026987	GO:0007166(cell surface receptor signaling pathway);GO:0004888(transmembrane signaling receptor activity);GO:0007186(G-protein coupled receptor signaling pathway);GO:0004930(G-protein coupled receptor activity);GO:0016021(integral component of membrane);GO:0016020(membrane)	NA	NA	NA		0.482568	0.45804	0	0.144834	0.132758	3.38845	1.76063	0.000834598	0.00293792	up	yes
ENSGALG00000000607	GPR37L1	ENSGALT00000000849	GO:0043235(receptor complex);GO:0005886(plasma membrane);GO:1903206(negative regulation of hydrogen peroxide-induced cell death);GO:0048712(negative regulation of astrocyte differentiation);GO:0045879(negative regulation of smoothened signaling pathway);GO:0045665(negative regulation of neuron differentiation);GO:0043410(positive regulation of MAPK cascade);GO:0021940(positive regulation of cereb…	NA	NA	NA	G protein-coupled receptor 37 like 1 [Source:HGNC Symbol;Acc:HGNC:14923]	1.32502	0.854394	0.07376	0.518375	0.337425	2.34456	1.22932	0.000853572	0.00299597	up	yes
ENSGALG00000015928		ENSGALT00000025673	GO:0004386(helicase activity);GO:0010501(RNA secondary structure unwinding);GO:0004004(ATP-dependent RNA helicase activity);GO:0005730(nucleolus);GO:0003723(RNA binding);GO:0005737(cytoplasm);GO:0016787(hydrolase activity);GO:0003676(nucleic acid binding);GO:0005524(ATP binding);GO:0000166(nucleotide binding)	NA	NA	NA		2.21147	0.577868	0.448248	0.128317	0	4.83786	2.27437	0.000859144	0.00301313	up	yes
ENSGALG00000008306	FGL2	ENSGALT00000013522	GO:0070062(extracellular exosome);GO:0008233(peptidase activity);GO:0006508(proteolysis)	NA	NA	NA	fibrinogen like 2 [Source:HGNC Symbol;Acc:HGNC:3696]	0.299026	0.780853	0	0.167418	0.109248	3.90319	1.96465	0.000884294	0.00309072	up	yes
ENSGALG00000043468	LRRC23	ENSGALT00000082428	NA	NA	NA	NA	leucine rich repeat containing 23 [Source:HGNC Symbol;Acc:HGNC:19138]	1.99049	1.37685	0.334636	0.940519	0.25673	2.19817	1.1363	0.00105635	0.00363275	up	yes
ENSGALG00000011551	JCHAIN	ENSGALT00000018840	GO:0072562(blood microparticle);GO:0071756(pentameric IgM immunoglobulin complex);GO:0071752(secretory dimeric IgA immunoglobulin complex);GO:0071751(secretory IgA immunoglobulin complex);GO:0071750(dimeric IgA immunoglobulin complex);GO:0071748(monomeric IgA immunoglobulin complex);GO:0070062(extracellular exosome);GO:0005615(extracellular space);GO:0060267(positive regulation of respiratory bur…	NA	NA	NA	joining chain of multimeric IgA and IgM [Source:HGNC Symbol;Acc:HGNC:5713]	1.47461	1.50033	0.257398	0.250779	0.962438	2.02292	1.01644	0.00119291	0.00404783	up	yes
ENSGALG00000034498		ENSGALT00000070566	NA	NA	NA	NA		1.51155	2.95378	0.18971	0.757455	0.980552	2.31638	1.21187	0.0012267	0.00414977	up	yes
ENSGALG00000027176		ENSGALT00000046183	GO:0006030(chitin metabolic process);GO:0008061(chitin binding);GO:0005576(extracellular region)	NA	NA	NA		0.47666	1.05561	0.284073	0	0.135331	3.65346	1.86926	0.00133324	0.00446916	up	yes
ENSGALG00000044841		ENSGALT00000090321	NA	NA	NA	NA		3.28007	3.21864	0.083335	1.17344	1.1657	2.68267	1.42367	0.00151138	0.00499814	up	yes
ENSGALG00000014861		ENSGALT00000023981	GO:0006468(protein phosphorylation);GO:0004674(protein serine/threonine kinase activity);GO:0035556(intracellular signal transduction);GO:0005634(nucleus);GO:0005737(cytoplasm);GO:0005524(ATP binding);GO:0004672(protein kinase activity);GO:0000166(nucleotide binding);GO:0016021(integral component of membrane);GO:0016020(membrane)	NA	NA	NA		1.40897	0.921141	0.500541	0	0.170355	3.47314	1.79624	0.00167568	0.00549627	up	yes
ENSGALG00000004642	NMNAT2	ENSGALT00000007394	GO:0045202(synapse);GO:0005802(trans-Golgi network);GO:0005794(Golgi apparatus);GO:0005770(late endosome);GO:0034628('de novo' NAD biosynthetic process from aspartate);GO:0004515(nicotinate-nucleotide adenylyltransferase activity);GO:0000309(nicotinamide-nucleotide adenylyltransferase activity);GO:0009058(biosynthetic process);GO:0003824(catalytic activity)	00760(Nicotinate and nicotinamide metabolism)	K06210	EC:2.7.7.1;EC:2.7.7.18	nicotinamide nucleotide adenylyltransferase 2 [Source:HGNC Symbol;Acc:HGNC:16789]	0.881565	0.722727	0.247209	0.412696	0.062458	2.22089	1.15114	0.00186692	0.00604586	up	yes
ENSGALG00000006926	CLDN25	ENSGALT00000011222	GO:0005923(bicellular tight junction);GO:0030054(cell junction);GO:0005198(structural molecule activity);GO:0005886(plasma membrane);GO:0016021(integral component of membrane);GO:0016020(membrane)	04514(Cell adhesion molecules (CAMs));04530(Tight junction)	K06087	NA	claudin 25 [Source:HGNC Symbol;Acc:HGNC:37218]	1.78215	2.48885	0.194721	1.10037	0.794829	2.04361	1.03112	0.0028899	0.00886544	up	yes
ENSGALG00000018942	NRGN	ENSGALT00000029889	GO:0005516(calmodulin binding)	NA	NA	NA	neurogranin [Source:HGNC Symbol;Acc:HGNC:8000]	3.38182	2.94768	0.126981	1.55045	1.14168	2.24521	1.16685	0.00300703	0.00918442	up	yes
ENSGALG00000011270	KERA	ENSGALT00000085113;ENSGALT00000018391;ENSGALT00000084147;ENSGALT00000076001;ENSGALT00000061247;ENSGALT00000089143	GO:0061303(cornea development in camera-type eye);GO:0005578(proteinaceous extracellular matrix);GO:0005615(extracellular space);GO:0005576(extracellular region);GO:0005576(extracellular region)	NA	NA	NA	keratocan [Source:HGNC Symbol;Acc:HGNC:6309]	10.1074	9.31573	90.437	83.4161	76.2024	0.0776753	-3.6864	1.13162e-73	3.00354e-71	down	yes
ENSGALG00000014873	GJA1	ENSGALT00000023996	GO:0070062(extracellular exosome);GO:0014704(intercalated disc);GO:0005921(gap junction);GO:0005925(focal adhesion);GO:0005739(mitochondrion);GO:0043123(positive regulation of I-kappaB kinase/NF-kappaB signaling);GO:0034220(ion transmembrane transport);GO:0010644(cell communication by electrical coupling);GO:0007267(cell-cell signaling);GO:0007165(signal transduction);GO:1903763(gap junction chan…	04540(Gap junction)	K07372	NA	gap junction protein alpha 1 [Source:HGNC Symbol;Acc:HGNC:4274]	10.2396	10.3143	115.272	97.9197	86.224	0.0686468	-3.86466	2.61231e-66	5.68328e-64	down	yes
ENSGALG00000015624	VCAN	ENSGALT00000025190	GO:0031012(extracellular matrix);GO:0016020(membrane);GO:0005615(extracellular space);GO:0001649(osteoblast differentiation);GO:0005540(hyaluronic acid binding);GO:0007155(cell adhesion);GO:0005509(calcium ion binding);GO:0005576(extracellular region)	04514(Cell adhesion molecules (CAMs))	K06793	NA	versican [Source:HGNC Symbol;Acc:HGNC:2464]	33.3074	32.7338	256.782	210.613	244.391	0.0927823	-3.43001	2.63063e-63	4.65481e-61	down	yes
ENSGALG00000023521	ADRA2A	ENSGALT00000039041	GO:0043235(receptor complex);GO:0005887(integral component of plasma membrane);GO:0005737(cytoplasm);GO:0090303(positive regulation of wound healing);GO:0071882(phospholipase C-activating adrenergic receptor signaling pathway);GO:0071881(adenylate cyclase-inhibiting adrenergic receptor signaling pathway);GO:0061179(negative regulation of insulin secretion involved in cellular response to glucose …	04080(Neuroactive ligand-receptor interaction)	K04138	NA	adrenoceptor alpha 2A [Source:HGNC Symbol;Acc:HGNC:281]	4.98314	3.60638	50.9156	49.7656	53.4885	0.0557147	-4.1658	5.953e-57	8.5872e-55	down	yes
ENSGALG00000016651		ENSGALT00000026878	GO:0005739(mitochondrion);GO:0006567(threonine catabolic process);GO:0008743(L-threonine 3-dehydrogenase activity);GO:0050662(coenzyme binding);GO:0055114(oxidation-reduction process);GO:0003824(catalytic activity);GO:0042802(identical protein binding)	00260(Glycine, serine and threonine metabolism)	K15789	EC:1.1.1.103		8.09863	13.4887	143.444	187.289	145.743	0.0453063	-4.46414	6.02473e-51	6.95253e-49	down	yes
ENSGALG00000011288	DACT2	ENSGALT00000057441;ENSGALT00000018417	GO:0007162(negative regulation of cell adhesion);GO:0008134(transcription factor binding);GO:0005739(mitochondrion);GO:0043588(skin development);GO:0008013(beta-catenin binding);GO:0002244(hematopoietic progenitor cell differentiation);GO:0005080(protein kinase C binding);GO:0051018(protein kinase A binding);GO:0070097(delta-catenin binding);GO:0003382(epithelial cell morphogenesis);GO:0072061(in…	NA	NA	NA	dishevelled binding antagonist of beta catenin 2 [Source:HGNC Symbol;Acc:HGNC:21231]	6.81186	7.92136	49.7792	44.0106	47.0971	0.104575	-3.25739	2.3185e-49	2.40381e-47	down	yes
ENSGALG00000005763	VILL	ENSGALT00000009258	GO:0007010(cytoskeleton organization);GO:0051015(actin filament binding);GO:0003779(actin binding)	NA	NA	NA	villin like [Source:HGNC Symbol;Acc:HGNC:30906]	1.7425	1.58032	18.9753	17.3647	18.6128	0.0604669	-4.04771	3.82895e-49	3.93907e-47	down	yes
ENSGALG00000033433		ENSGALT00000070818	NA	NA	NA	NA		2.4343	3.20983	67.6053	61.303	38.258	0.0337636	-4.88839	9.54837e-48	9.31739e-46	down	yes
ENSGALG00000015419	PENK	ENSGALT00000024871	GO:0019233(sensory perception of pain);GO:0007626(locomotory behavior);GO:0002118(aggressive behavior);GO:0001964(startle response);GO:0001662(behavioral fear response);GO:0043679(axon terminus);GO:0007600(sensory perception);GO:0031628(opioid receptor binding);GO:0005184(neuropeptide hormone activity);GO:0043025(neuronal cell body);GO:0030425(dendrite);GO:0007268(chemical synaptic transmission);…	NA	NA	NA	proenkephalin [Source:HGNC Symbol;Acc:HGNC:8831]	56.3806	69.489	395.08	442.142	364.158	0.104771	-3.25469	1.24749e-45	1.08917e-43	down	yes
ENSGALG00000003922	TOP2A	ENSGALT00000053578;ENSGALT00000040062;ENSGALT00000056361;ENSGALT00000076167	GO:0043234(protein complex);GO:0009330(DNA topoisomerase complex (ATP-hydrolyzing));GO:0005814(centriole);GO:0005730(nucleolus);GO:0005634(nucleus);GO:0005654(nucleoplasm);GO:0000793(condensed chromosome);GO:0000228(nuclear chromosome);GO:0045944(positive regulation of transcription from RNA polymerase II promoter);GO:0045870(positive regulation of single stranded viral RNA replication via double…	NA	NA	NA	DNA topoisomerase II alpha [Source:HGNC Symbol;Acc:HGNC:11989]	17.4304	16.3427	85.068	77.1803	88.3914	0.134747	-2.89167	3.17639e-44	2.58613e-42	down	yes
ENSGALG00000004448	BRINP2	ENSGALT00000007079	GO:0071300(cellular response to retinoic acid);GO:0045930(negative regulation of mitotic cell cycle);GO:0045666(positive regulation of neuron differentiation);GO:0043025(neuronal cell body);GO:0030425(dendrite);GO:0005783(endoplasmic reticulum)	NA	NA	NA	BMP/retinoic acid inducible neural specific 2 [Source:HGNC Symbol;Acc:HGNC:13746]	1.41546	0.800753	17.9411	20.9345	27.1883	0.0335466	-4.89769	3.12825e-41	2.25625e-39	down	yes
ENSGALG00000001472	JAM3	ENSGALT00000002230	GO:0044291(cell-cell contact zone);GO:0043220(Schmidt-Lanterman incisure);GO:0033010(paranodal junction);GO:0030057(desmosome);GO:0005923(bicellular tight junction);GO:0005911(cell-cell junction);GO:0005615(extracellular space);GO:0090138(regulation of actin cytoskeleton organization by cell-cell adhesion);GO:0090022(regulation of neutrophil chemotaxis);GO:0042552(myelination);GO:0030010(establis…	04514(Cell adhesion molecules (CAMs));04530(Tight junction)	K06785	NA	junctional adhesion molecule 3 [Source:HGNC Symbol;Acc:HGNC:15532]	43.2381	46.0526	196.918	222.421	207.328	0.142485	-2.81112	6.91079e-38	4.43058e-36	down	yes
ENSGALG00000040493	PTN	ENSGALT00000049974	GO:0019901(protein kinase binding);GO:0008284(positive regulation of cell proliferation);GO:0008201(heparin binding);GO:0005615(extracellular space);GO:0008083(growth factor activity);GO:0030282(bone mineralization);GO:0043234(protein complex);GO:0005783(endoplasmic reticulum);GO:0007612(learning);GO:0001503(ossification);GO:0035374(chondroitin sulfate binding)	NA	NA	NA	pleiotrophin [Source:HGNC Symbol;Acc:HGNC:9630]	7.391	8.3554	71.7274	49.1307	47.0271	0.0937927	-3.41438	5.70209e-37	3.51965e-35	down	yes
ENSGALG00000003473	SFRP1	ENSGALT00000005499;ENSGALT00000089330;ENSGALT00000081645	GO:0070062(extracellular exosome);GO:0031012(extracellular matrix);GO:0009986(cell surface);GO:0005829(cytosol);GO:0005622(intracellular);GO:0005615(extracellular space);GO:0005578(proteinaceous extracellular matrix);GO:2001238(positive regulation of extrinsic apoptotic signaling pathway);GO:2000271(positive regulation of fibroblast apoptotic process);GO:2000270(negative regulation of fibroblast …	04310(Wnt signaling pathway);04310(Wnt signaling pathway)	K02166	NA	secreted frizzled related protein 1 [Source:HGNC Symbol;Acc:HGNC:10776]	14.4714	14.6206	65.692	59.2499	60.4015	0.156963	-2.6715	2.1577e-36	1.28986e-34	down	yes
ENSGALG00000011511	CKB	ENSGALT00000018765;ENSGALT00000086156;ENSGALT00000053131;ENSGALT00000087830;ENSGALT00000085511	GO:0065010(extracellular membrane-bounded organelle);GO:0006754(ATP biosynthetic process);GO:0004111(creatine kinase activity);GO:0070062(extracellular exosome);GO:0043209(myelin sheath);GO:0005829(cytosol);GO:0005739(mitochondrion);GO:0021762(substantia nigra development);GO:0031625(ubiquitin protein ligase binding);GO:0016772(transferase activity, transferring phosphorus-containing groups);GO:0…	00330(Arginine and proline metabolism);00330(Arginine and proline metabolism)	NA	NA	Creatine kinase B-type [Source:UniProtKB/Swiss-Prot;Acc:P05122]	12.0825	8.62239	81.0944	61.9016	87.346	0.0898878	-3.47573	2.34158e-36	1.38728e-34	down	yes
ENSGALG00000008367	MDK	ENSGALT00000084920;ENSGALT00000013622;ENSGALT00000088684	GO:1901215(negative regulation of neuron death);GO:0050795(regulation of behavior);GO:0045893(positive regulation of transcription, DNA-templated);GO:0043524(negative regulation of neuron apoptotic process);GO:0030421(defecation);GO:0021987(cerebral cortex development);GO:0021766(hippocampus development);GO:0021681(cerebellar granular layer development);GO:0021542(dentate gyrus development);GO:00…	NA	NA	NA	midkine [Source:HGNC Symbol;Acc:HGNC:6972]	12.7927	13.3727	101.737	75.2024	81.2309	0.101349	-3.30259	2.41577e-36	1.42487e-34	down	yes
ENSGALG00000039452		ENSGALT00000077890	NA	NA	NA	NA		13.6678	14.0039	64.0993	60.668	56.386	0.152753	-2.71073	8.79591e-36	5.14232e-34	down	yes
ENSGALG00000015115	MAMDC2	ENSGALT00000024387;ENSGALT00000073905	GO:0005783(endoplasmic reticulum);GO:0016020(membrane);GO:0016020(membrane)	NA	NA	NA	MAM domain containing 2 [Source:HGNC Symbol;Acc:HGNC:23673]	10.3557	9.32788	47.748	53.7991	46.1651	0.133256	-2.90772	1.46337e-35	8.44363e-34	down	yes
ENSGALG00000012462	KIF5C	ENSGALT00000020366	GO:0043005(neuron projection);GO:0005737(cytoplasm);GO:0035253(ciliary rootlet);GO:0051028(mRNA transport);GO:0008045(motor neuron axon guidance);GO:0007411(axon guidance);GO:0008574(ATP-dependent microtubule motor activity, plus-end-directed);GO:0030705(cytoskeleton-dependent intracellular transport);GO:0008104(protein localization);GO:0005871(kinesin complex);GO:0007018(microtubule-based moveme…	04144(Endocytosis)	K10396	NA	kinesin family member 5C [Source:HGNC Symbol;Acc:HGNC:6325]	1.93936	2.27794	10.905	12.0666	11.8504	0.12111	-3.04561	1.90237e-35	1.0882e-33	down	yes
ENSGALG00000041028		ENSGALT00000063293	NA	NA	NA	NA		2.43991	2.54955	22.6139	27.0667	21.4784	0.070117	-3.83409	2.42218e-35	1.37371e-33	down	yes
ENSGALG00000009601	NELL2	ENSGALT00000038787;ENSGALT00000047907	GO:0005623(cell);GO:0005509(calcium ion binding);GO:0005509(calcium ion binding)	NA	NA	NA	neural EGFL like 2 [Source:HGNC Symbol;Acc:HGNC:7751]	2.18561	3.48381	36.157	25.8559	24.3825	0.0656218	-3.92968	4.08949e-35	2.28032e-33	down	yes
ENSGALG00000039101	Asip	ENSGALT00000066605;ENSGALT00000088458;ENSGALT00000083604;ENSGALT00000090088;ENSGALT00000080063;ENSGALT00000056109	GO:0071514(genetic imprinting);GO:0048023(positive regulation of melanin biosynthetic process);GO:0043473(pigmentation);GO:0042438(melanin biosynthetic process);GO:0040030(regulation of molecular function, epigenetic);GO:0032438(melanosome organization);GO:0032402(melanosome transport);GO:0008343(adult feeding behavior);GO:0006091(generation of precursor metabolites and energy);GO:0031782(type 4 …	04916(Melanogenesis);04916(Melanogenesis)	K08725	NA	agouti-signaling protein precursor [Source:RefSeq peptide;Acc:NP_001108551]	0.110405	0.306452	17.9448	10.5089	10.9413	0.0105814	-6.56232	4.80679e-35	2.64692e-33	down	yes
ENSGALG00000003584	KPNA2	ENSGALT00000083642;ENSGALT00000005672;ENSGALT00000058245	GO:0005643(nuclear pore);GO:0006607(NLS-bearing protein import into nucleus);GO:0008139(nuclear localization sequence binding);GO:0006606(protein import into nucleus);GO:0008565(protein transporter activity);GO:0015031(protein transport);GO:0005829(cytosol);GO:0005654(nucleoplasm);GO:0006810(transport);GO:0005737(cytoplasm);GO:0005634(nucleus);GO:0003723(RNA binding);GO:0016020(membrane);GO:00428…	05164(Influenza A);05164(Influenza A)	K15043	NA	karyopherin subunit alpha 2 [Source:HGNC Symbol;Acc:HGNC:6395]	30.5976	33.3437	149.94	126.173	143.809	0.152269	-2.7153	6.00018e-35	3.29043e-33	down	yes
ENSGALG00000034109	GRIA3	ENSGALT00000055549;ENSGALT00000049874	GO:0016020(membrane);GO:0045211(postsynaptic membrane);GO:0032281(AMPA glutamate receptor complex);GO:0004971(AMPA glutamate receptor activity);GO:0004971(AMPA glutamate receptor activity)	04080(Neuroactive ligand-receptor interaction);04080(Neuroactive ligand-receptor interaction)	K05199	NA	glutamate ionotropic receptor AMPA type subunit 3 [Source:HGNC Symbol;Acc:HGNC:4573]	1.66085	1.67461	25.2369	15.3594	15.9127	0.0590254	-4.08252	1.28681e-34	6.99888e-33	down	yes
ENSGALG00000036824	CDH23	ENSGALT00000082526;ENSGALT00000063543;ENSGALT00000081065	NA	NA	NA	NA	cadherin related 23 [Source:HGNC Symbol;Acc:HGNC:13733]	7.43598	7.33969	37.7561	33.7582	30.9753	0.144168	-2.79418	1.33746e-34	7.24464e-33	down	yes
ENSGALG00000007128	SH3BGRL	ENSGALT00000032361;ENSGALT00000055134	GO:0005615(extracellular space);GO:0070062(extracellular exosome);GO:0070062(extracellular exosome)	NA	NA	NA	SH3 domain binding glutamate rich protein like [Source:HGNC Symbol;Acc:HGNC:10823]	39.8519	42.5558	211.457	176.268	173.634	0.1468	-2.76808	1.50566e-34	8.12259e-33	down	yes
ENSGALG00000034271	UHRF1	ENSGALT00000062472	GO:0005634(nucleus);GO:0000122(negative regulation of transcription from RNA polymerase II promoter);GO:0035064(methylated histone binding);GO:0005657(replication fork);GO:0000790(nuclear chromatin);GO:0061630(ubiquitin protein ligase activity);GO:0016363(nuclear matrix);GO:0000792(heterochromatin);GO:0005720(nuclear heterochromatin);GO:0031493(nucleosomal histone binding);GO:0042802(identical pr…	NA	NA	NA	ubiquitin like with PHD and ring finger domains 1 [Source:HGNC Symbol;Acc:HGNC:12556]	14.6413	15.7433	63.1276	62.603	69.6781	0.155492	-2.68509	3.27977e-34	1.72722e-32	down	yes
ENSGALG00000004653		ENSGALT00000090215;ENSGALT00000007414;ENSGALT00000085306	GO:0032420(stereocilium);GO:0060122(inner ear receptor stereocilium organization);GO:0007626(locomotory behavior);GO:0005886(plasma membrane);GO:0007156(homophilic cell adhesion via plasma membrane adhesion molecules);GO:0007605(sensory perception of sound);GO:0007155(cell adhesion);GO:0005509(calcium ion binding);GO:0016021(integral component of membrane);GO:0016020(membrane);GO:0016020(membrane)	NA	NA	NA		6.2506	7.46141	34.166	32.4248	29.3991	0.142849	-2.80744	3.41016e-34	1.78174e-32	down	yes
ENSGALG00000031593		ENSGALT00000049155	GO:0003785(actin monomer binding);GO:0007015(actin filament organization)	NA	NA	NA		206.716	170.64	831.9	989.183	1072.38	0.130417	-2.9388	5.96557e-34	3.09254e-32	down	yes
ENSGALG00000003465		ENSGALT00000034318	GO:0046872(metal ion binding);GO:0005509(calcium ion binding)	NA	NA	NA	Parvalbumin, thymic [Source:UniProtKB/Swiss-Prot;Acc:P19753]	140.258	136.327	557.83	689.534	696.433	0.142291	-2.81308	1.97556e-33	1.00837e-31	down	yes
ENSGALG00000009301	CHRNA1	ENSGALT00000065398;ENSGALT00000055980;ENSGALT00000015138	GO:0005886(plasma membrane);GO:0009986(cell surface);GO:0016020(membrane);GO:0007528(neuromuscular junction development);GO:0031594(neuromuscular junction);GO:0007274(neuromuscular synaptic transmission);GO:0015464(acetylcholine receptor activity);GO:0022848(acetylcholine-gated cation-selective channel activity);GO:0042166(acetylcholine binding);GO:0003009(skeletal muscle contraction);GO:0019228(…	04080(Neuroactive ligand-receptor interaction);04080(Neuroactive ligand-receptor interaction)	K04803	NA	cholinergic receptor nicotinic alpha 1 subunit [Source:HGNC Symbol;Acc:HGNC:1955]	13.7532	16.5359	73.8735	62.2585	68.45	0.148054	-2.75581	3.69607e-33	1.82344e-31	down	yes
ENSGALG00000021128	FSCN1	ENSGALT00000034001;ENSGALT00000072154	GO:0071437(invadopodium);GO:0070062(extracellular exosome);GO:0044393(microspike);GO:0043209(myelin sheath);GO:0031253(cell projection membrane);GO:0030426(growth cone);GO:0030175(filopodium);GO:0030027(lamellipodium);GO:0015629(actin cytoskeleton);GO:0005911(cell-cell junction);GO:0005902(microvillus);GO:0005856(cytoskeleton);GO:0005829(cytosol);GO:0005737(cytoplasm);GO:0002102(podosome);GO:0001…	NA	NA	NA	fascin actin-bundling protein 1 [Source:HGNC Symbol;Acc:HGNC:11148]	49.8845	55.5541	249.43	201.305	234.487	0.153875	-2.70017	1.87934e-32	9.00388e-31	down	yes
ENSGALG00000041577	ITGA4	ENSGALT00000063969	GO:0005925(focal adhesion);GO:0005886(plasma membrane);GO:0016020(membrane);GO:0034446(substrate adhesion-dependent cell spreading);GO:0070062(extracellular exosome);GO:0007160(cell-matrix adhesion);GO:0009986(cell surface);GO:0035987(endodermal cell differentiation);GO:0034113(heterotypic cell-cell adhesion);GO:0007159(leukocyte cell-cell adhesion);GO:0019960(C-X3-C chemokine binding);GO:0050839…	04512(ECM-receptor interaction);04514(Cell adhesion molecules (CAMs));04510(Focal adhesion);04810(Regulation of actin cytoskeleton);04672(Intestinal immune network for IgA production)	K06483	NA	integrin subunit alpha 4 [Source:HGNC Symbol;Acc:HGNC:6140]	10.8807	12.0558	51.166	44.6936	48.1086	0.159316	-2.65003	2.78565e-31	1.27918e-29	down	yes
ENSGALG00000005613		ENSGALT00000009008	GO:0043565(sequence-specific DNA binding);GO:0003700(transcription factor activity, sequence-specific DNA binding);GO:0007275(multicellular organism development);GO:0006355(regulation of transcription, DNA-templated);GO:0005634(nucleus);GO:0003677(DNA binding)	NA	NA	NA		16.0047	18.2203	83.2431	98.2157	114.692	0.115566	-3.11321	2.8347e-31	1.29722e-29	down	yes
ENSGALG00000036441	WIPF1	ENSGALT00000071248	GO:0015629(actin cytoskeleton);GO:0005884(actin filament);GO:0051707(response to other organism);GO:0030048(actin filament-based movement);GO:0017124(SH3 domain binding);GO:0008154(actin polymerization or depolymerization);GO:0003779(actin binding)	04144(Endocytosis)	K19475	NA	WAS/WASL interacting protein family member 1 [Source:HGNC Symbol;Acc:HGNC:12736]	26.6204	34.9571	144.814	136.974	132.833	0.148515	-2.75132	5.56835e-31	2.53074e-29	down	yes
ENSGALG00000000690	GDPD4	ENSGALT00000000973	GO:0008889(glycerophosphodiester phosphodiesterase activity);GO:0008081(phosphoric diester hydrolase activity);GO:0006629(lipid metabolic process);GO:0016021(integral component of membrane);GO:0016020(membrane)	NA	NA	NA	glycerophosphodiester phosphodiesterase domain containing 4 [Source:HGNC Symbol;Acc:HGNC:24849]	0.249761	0.664943	11.1555	13.7293	12.9601	0.0241698	-5.37065	1.50086e-30	6.61727e-29	down	yes
ENSGALG00000003595	SARM1	ENSGALT00000005687	GO:0045202(synapse);GO:0031315(extrinsic component of mitochondrial outer membrane);GO:0030425(dendrite);GO:0015630(microtubule cytoskeleton);GO:0005874(microtubule);GO:0005739(mitochondrion);GO:0005737(cytoplasm);GO:1901214(regulation of neuron death);GO:0048814(regulation of dendrite morphogenesis);GO:0042981(regulation of apoptotic process);GO:0009749(response to glucose);GO:0007165(signal tra…	NA	NA	NA	sterile alpha and TIR motif containing 1 [Source:HGNC Symbol;Acc:HGNC:17074]	6.10484	5.34607	30.558	26.937	31.7006	0.12838	-2.96151	1.92006e-30	8.38195e-29	down	yes
ENSGALG00000011881	CCNA2	ENSGALT00000019387	GO:0097124(cyclin A2-CDK2 complex);GO:0005829(cytosol);GO:0005737(cytoplasm);GO:0005654(nucleoplasm);GO:0005634(nucleus);GO:0001940(male pronucleus);GO:0001939(female pronucleus);GO:0000307(cyclin-dependent protein kinase holoenzyme complex);GO:0045893(positive regulation of transcription, DNA-templated);GO:0044843(cell cycle G1/S phase transition);GO:0007265(Ras protein signal transduction);GO:0…	04110(Cell cycle);04218(Cellular senescence);04914(Progesterone-mediated oocyte maturation)	K06627	NA	cyclin A2 [Source:HGNC Symbol;Acc:HGNC:1578]	19.3803	20.8577	82.6883	75.6106	80.1557	0.168745	-2.56708	4.00342e-30	1.7194e-28	down	yes
ENSGALG00000014692	LMNB1	ENSGALT00000023681	GO:0031965(nuclear membrane);GO:0016363(nuclear matrix);GO:0016020(membrane);GO:0005654(nucleoplasm);GO:0005638(lamin filament);GO:0005637(nuclear inner membrane);GO:0005635(nuclear envelope);GO:0005634(nucleus);GO:0043274(phospholipase binding);GO:0005882(intermediate filament);GO:0005198(structural molecule activity)	04210(Apoptosis)	K07611	NA	lamin B1 [Source:HGNC Symbol;Acc:HGNC:6637]	6.99941	8.90609	50.1795	40.3183	39.8256	0.122046	-3.0345	4.24891e-30	1.81894e-28	down	yes
ENSGALG00000006110	PLK1	ENSGALT00000009864;ENSGALT00000085798;ENSGALT00000083417;ENSGALT00000086918	GO:0051233(spindle midzone);GO:0030496(midbody);GO:0015630(microtubule cytoskeleton);GO:0005876(spindle microtubule);GO:0005819(spindle);GO:0005813(centrosome);GO:0005634(nucleus);GO:0000942(condensed nuclear chromosome outer kinetochore);GO:0000922(spindle pole);GO:0000795(synaptonemal complex);GO:0000785(chromatin);GO:0000780(condensed nuclear chromosome, centromeric region);GO:0000776(kinetoch…	04068(FoxO signaling pathway);04110(Cell cycle);04114(Oocyte meiosis);04914(Progesterone-mediated oocyte maturation);04914(Progesterone-mediated oocyte maturation)	K06631	EC:2.7.11.21	polo like kinase 1 [Source:HGNC Symbol;Acc:HGNC:9077]	12.9493	10.5734	49.7568	51.1138	58.529	0.14757	-2.76053	4.3482e-30	1.85546e-28	down	yes
ENSGALG00000016803	ST6GAL2	ENSGALT00000036571	GO:0097503(sialylation);GO:0009311(oligosaccharide metabolic process);GO:0008373(sialyltransferase activity);GO:0003835(beta-galactoside alpha-2,6-sialyltransferase activity);GO:0006486(protein glycosylation);GO:0016757(transferase activity, transferring glycosyl groups);GO:0016740(transferase activity);GO:0016021(integral component of membrane);GO:0016020(membrane)	00510(N-Glycan biosynthesis);00514(Other types of O-glycan biosynthesis)	K00779	EC:2.4.99.1	ST6 beta-galactoside alpha-2,6-sialyltransferase 2 [Source:HGNC Symbol;Acc:HGNC:10861]	2.54142	4.40555	33.9446	33.3742	26.1396	0.0743321	-3.74987	7.31848e-30	3.09311e-28	down	yes
ENSGALG00000010798	DHCR24	ENSGALT00000017560	GO:0016020(membrane);GO:0005783(endoplasmic reticulum);GO:0005634(nucleus);GO:0061024(membrane organization);GO:0055114(oxidation-reduction process);GO:0043588(skin development);GO:0043154(negative regulation of cysteine-type endopeptidase activity involved in apoptotic process);GO:0043066(negative regulation of apoptotic process);GO:0042987(amyloid precursor protein catabolic process);GO:0031639…	00100(Steroid biosynthesis)	K09828	EC:1.3.1.72;EC:1.3.1.-	24-dehydrocholesterol reductase [Source:RefSeq peptide;Acc:NP_001026459]	1.30635	1.86991	30.1592	20.0371	14.3875	0.0491804	-4.34577	1.24319e-29	5.13966e-28	down	yes
ENSGALG00000004794	H2AFY2	ENSGALT00000088636;ENSGALT00000007651;ENSGALT00000085998	GO:0000790(nuclear chromatin);GO:0000786(nucleosome);GO:0016569(covalent chromatin modification);GO:0006334(nucleosome assembly);GO:0006342(chromatin silencing);GO:0046982(protein heterodimerization activity);GO:0031490(chromatin DNA binding);GO:0005694(chromosome);GO:0003677(DNA binding);GO:0005634(nucleus);GO:0016021(integral component of membrane);GO:0016020(membrane);GO:0035098(ESC/E(Z) compl…	04217(Necroptosis);04217(Necroptosis)	K11251	NA	H2A histone family member Y2 [Source:HGNC Symbol;Acc:HGNC:14453]	11.9668	12.3203	47.9048	51.8349	52.8671	0.159148	-2.65156	1.45392e-29	5.95523e-28	down	yes
ENSGALG00000040954		ENSGALT00000046405	NA	NA	NA	NA		1.08189	1.18364	22.325	12.2626	14.9331	0.0457491	-4.45011	1.65411e-29	6.75437e-28	down	yes
ENSGALG00000006904	RNH1	ENSGALT00000011181;ENSGALT00000089734	GO:0070062(extracellular exosome);GO:0032311(angiogenin-PRI complex);GO:0005829(cytosol);GO:0005654(nucleoplasm);GO:0045765(regulation of angiogenesis);GO:0008428(ribonuclease inhibitor activity);GO:0043086(negative regulation of catalytic activity);GO:0043086(negative regulation of catalytic activity)	NA	NA	NA	ribonuclease/angiogenin inhibitor 1 [Source:HGNC Symbol;Acc:HGNC:10074]	28.529	29.007	105.173	108.881	104.949	0.180362	-2.47103	2.35168e-29	9.51498e-28	down	yes
ENSGALG00000033405	DBN1	ENSGALT00000078180;ENSGALT00000062237	GO:0045296(cadherin binding);GO:0030426(growth cone);GO:0016020(membrane);GO:0005886(plasma membrane);GO:0015629(actin cytoskeleton);GO:0005911(cell-cell junction);GO:0007015(actin filament organization);GO:0005921(gap junction);GO:0010643(cell communication by chemical coupling);GO:0010644(cell communication by electrical coupling);GO:0032507(maintenance of protein location in cell);GO:0048699(g…	NA	NA	NA	drebrin 1 [Source:HGNC Symbol;Acc:HGNC:2695]	8.13878	11.0008	44.6739	52.5949	55.6799	0.125137	-2.99841	3.52215e-29	1.41644e-27	down	yes
ENSGALG00000037773	ST3GAL1	ENSGALT00000049825	GO:0070062(extracellular exosome);GO:0097503(sialylation);GO:0016020(membrane);GO:0006486(protein glycosylation);GO:0006468(protein phosphorylation);GO:0006054(N-acetylneuraminate metabolic process);GO:0003836(beta-galactoside (CMP) alpha-2,3-sialyltransferase activity);GO:0032580(Golgi cisterna membrane);GO:0009311(oligosaccharide metabolic process);GO:0006487(protein N-linked glycosylation);GO:…	00512(Mucin type O-glycan biosynthesis);00533(Glycosaminoglycan biosynthesis - keratan sulfate);00603(Glycosphingolipid biosynthesis - globo and isoglobo series);00604(Glycosphingolipid biosynthesis - ganglio series)	K00780	EC:2.4.99.4	CMP-N-acetylneuraminate-beta-galactosamide-alpha-2,3-sialyltransferase 1 [Source:UniProtKB/Swiss-Prot;Acc:Q11200]	10.616	10.5144	48.7577	44.6612	42.7312	0.155199	-2.6878	4.43947e-29	1.77994e-27	down	yes
ENSGALG00000009845	GJD2	ENSGALT00000016006	GO:0005922(connexin complex);GO:0005921(gap junction);GO:0007154(cell communication);GO:0030054(cell junction);GO:0005886(plasma membrane);GO:0016021(integral component of membrane);GO:0016020(membrane);GO:0001508(action potential);GO:0007267(cell-cell signaling);GO:0007268(chemical synaptic transmission);GO:0007601(visual perception)	04540(Gap junction)	K07373	NA	gap junction protein delta 2 [Source:HGNC Symbol;Acc:HGNC:19154]	3.02554	2.05615	23.1924	26.2681	27.272	0.066226	-3.91646	9.28868e-29	3.69072e-27	down	yes
ENSGALG00000015704		ENSGALT00000025326	GO:0043388(positive regulation of DNA binding);GO:0009314(response to radiation);GO:0033158(regulation of protein import into nucleus, translocation);GO:0047134(protein-disulfide reductase activity);GO:0016671(oxidoreductase activity, acting on a sulfur group of donors, disulfide as acceptor);GO:0045454(cell redox homeostasis);GO:0034599(cellular response to oxidative stress);GO:0004791(thioredox…	04621(NOD-like receptor signaling pathway)	K03671	NA	Thioredoxin [Source:UniProtKB/Swiss-Prot;Acc:P08629]	44.9268	46.0628	377.503	230.136	435.004	0.0872681	-3.5184	1.16357e-28	4.59575e-27	down	yes
ENSGALG00000016442		ENSGALT00000026525;ENSGALT00000088818	GO:0051290(protein heterotetramerization);GO:0051259(protein oligomerization);GO:0009263(deoxyribonucleotide biosynthetic process);GO:0009262(deoxyribonucleotide metabolic process);GO:0004748(ribonucleoside-diphosphate reductase activity, thioredoxin disulfide as acceptor);GO:0055114(oxidation-reduction process);GO:0008199(ferric iron binding);GO:0042803(protein homodimerization activity);GO:0005…	00230(Purine metabolism);00240(Pyrimidine metabolism);00480(Glutathione metabolism);04115(p53 signaling pathway);04115(p53 signaling pathway)	K10808	EC:1.17.4.1		8.24738	8.32714	36.8286	34.9267	35.9312	0.153915	-2.6998	1.35787e-28	5.34726e-27	down	yes
ENSGALG00000001449	STRA6	ENSGALT00000002203	GO:0043234(protein complex);GO:0097070(ductus arteriosus closure);GO:0061205(paramesonephric duct development);GO:0061156(pulmonary artery morphogenesis);GO:0061143(alveolar primary septum development);GO:0061038(uterus morphogenesis);GO:0061029(eyelid development in camera-type eye);GO:0060900(embryonic camera-type eye formation);GO:0060426(lung vasculature development);GO:0060323(head morphogen…	NA	NA	NA	stimulated by retinoic acid 6 [Source:HGNC Symbol;Acc:HGNC:30650]	5.69924	4.53928	30.0831	34.0102	24.5252	0.115535	-3.1136	1.37982e-28	5.41765e-27	down	yes
ENSGALG00000015358	MYH15	ENSGALT00000036887;ENSGALT00000058584	GO:0016459(myosin complex);GO:0003774(motor activity);GO:0051015(actin filament binding);GO:0003779(actin binding);GO:0005524(ATP binding);GO:0000166(nucleotide binding);GO:0000166(nucleotide binding)	04260(Cardiac muscle contraction);04261(Adrenergic signaling in cardiomyocytes);04261(Adrenergic signaling in cardiomyocytes)	K17751	NA	myosin heavy chain 15 [Source:HGNC Symbol;Acc:HGNC:31073]	1.77105	1.91253	10.0686	8.89443	8.8261	0.132554	-2.91534	1.7357e-28	6.75496e-27	down	yes
ENSGALG00000040244	SEPT9	ENSGALT00000047767	GO:0097730(non-motile cilium);GO:0048471(perinuclear region of cytoplasm);GO:0031105(septin complex);GO:0015629(actin cytoskeleton);GO:0005874(microtubule);GO:0005930(axoneme);GO:0001725(stress fiber);GO:1902857(positive regulation of non-motile cilium assembly);GO:0051291(protein heterooligomerization);GO:0045296(cadherin binding);GO:0005525(GTP binding);GO:0000166(nucleotide binding)	NA	NA	NA	septin 9 [Source:HGNC Symbol;Acc:HGNC:7323]	54.5768	48.8901	197.243	197.718	181.533	0.179476	-2.47814	2.51916e-28	9.71853e-27	down	yes
ENSGALG00000004195		ENSGALT00000006667	GO:0008574(ATP-dependent microtubule motor activity, plus-end-directed);GO:0005871(kinesin complex);GO:0007018(microtubule-based movement);GO:0008017(microtubule binding);GO:0003777(microtubule motor activity);GO:0003774(motor activity);GO:0005524(ATP binding);GO:0000166(nucleotide binding)	NA	NA	NA		8.83312	9.76747	35.6729	33.9228	40.5472	0.168877	-2.56595	1.10339e-27	4.03392e-26	down	yes
ENSGALG00000016676	MCM3	ENSGALT00000026909	GO:0048471(perinuclear region of cytoplasm);GO:0042555(MCM complex);GO:0016020(membrane);GO:0005813(centrosome);GO:0005654(nucleoplasm);GO:0005737(cytoplasm);GO:0005634(nucleus);GO:0003682(chromatin binding);GO:0000784(nuclear chromosome, telomeric region);GO:0006260(DNA replication);GO:0006270(DNA replication initiation);GO:0004386(helicase activity);GO:0016787(hydrolase activity);GO:0003677(DNA…	03030(DNA replication);04110(Cell cycle)	K02541	EC:3.6.4.12	minichromosome maintenance complex component 3 [Source:HGNC Symbol;Acc:HGNC:6945]	14.211	13.93	51.4201	48.159	51.9768	0.18568	-2.42911	1.9247e-27	6.94095e-26	down	yes
ENSGALG00000001267		ENSGALT00000001934;ENSGALT00000069519	GO:0005737(cytoplasm);GO:2000147(positive regulation of cell motility);GO:0070371(ERK1 and ERK2 cascade);GO:0060502(epithelial cell proliferation involved in lung morphogenesis);GO:0060440(trachea formation);GO:0060425(lung morphogenesis);GO:0060324(face development);GO:0050772(positive regulation of axonogenesis);GO:0048679(regulation of axon regeneration);GO:0048538(thymus development);GO:00308…	04010(MAPK signaling pathway);04012(ErbB signaling pathway);04370(VEGF signaling pathway);04371(Apelin signaling pathway);04068(FoxO signaling pathway);04150(mTOR signaling pathway);04140(Autophagy - animal);04210(Apoptosis);04218(Cellular senescence);04540(Gap junction);04810(Regulation of actin cytoskeleton);04620(Toll-like receptor signaling pathway);04910(Insulin signaling pathway);04912(GnRH…	K04369	EC:2.7.12.2		29.5456	29.8437	111.065	112.339	102.339	0.18232	-2.45546	2.7103e-27	9.66891e-26	down	yes
ENSGALG00000004250	B4GALNT4	ENSGALT00000006762	GO:0008376(acetylgalactosaminyltransferase activity);GO:0032580(Golgi cisterna membrane);GO:0005794(Golgi apparatus);GO:0016740(transferase activity);GO:0033842(N-acetyl-beta-glucosaminyl-glycoprotein 4-beta-N-acetylgalactosaminyltransferase activity)	NA	NA	NA	beta-1,4-N-acetyl-galactosaminyltransferase 4 [Source:HGNC Symbol;Acc:HGNC:26315]	6.65313	7.4927	27.9772	26.4198	28.9475	0.169727	-2.55871	5.43868e-27	1.9145e-25	down	yes
ENSGALG00000033671	FREM2	ENSGALT00000078166	GO:0070062(extracellular exosome);GO:0048839(inner ear development);GO:0007507(heart development);GO:0005604(basement membrane);GO:0002009(morphogenesis of an epithelium)	NA	NA	NA	FRAS1 related extracellular matrix protein 2 [Source:HGNC Symbol;Acc:HGNC:25396]	112.1	107.69	428.918	430.569	367.824	0.179083	-2.4813	1.09613e-26	3.81805e-25	down	yes
ENSGALG00000035030	KIF20A	ENSGALT00000059685	GO:0030496(midbody);GO:0005819(spindle);GO:0001578(microtubule bundle formation);GO:0000920(cell separation after cytokinesis);GO:0000910(cytokinesis);GO:0000281(mitotic cytokinesis);GO:0019901(protein kinase binding);GO:0005874(microtubule);GO:0005794(Golgi apparatus);GO:0007018(microtubule-based movement);GO:0008017(microtubule binding);GO:0003777(microtubule motor activity);GO:0003774(motor ac…	NA	NA	NA	kinesin family member 20A [Source:HGNC Symbol;Acc:HGNC:9787]	11.1551	12.2921	44.7241	41.6343	40.7701	0.184437	-2.4388	1.80403e-26	6.25097e-25	down	yes
ENSGALG00000005979	OXSR1	ENSGALT00000009616	GO:0070062(extracellular exosome);GO:0005829(cytosol);GO:2000687(negative regulation of rubidium ion transmembrane transporter activity);GO:2000681(negative regulation of rubidium ion transport);GO:1901380(negative regulation of potassium ion transmembrane transport);GO:1901017(negative regulation of potassium ion transmembrane transporter activity);GO:0071476(cellular hypotonic response);GO:0035…	NA	NA	NA	oxidative stress responsive 1 [Source:HGNC Symbol;Acc:HGNC:8508]	23.7325	25.7293	89.4173	93.8494	89.9995	0.181002	-2.46592	2.64107e-26	9.10381e-25	down	yes
ENSGALG00000005519	TLL2	ENSGALT00000061149;ENSGALT00000008855	GO:0048632(negative regulation of skeletal muscle tissue growth);GO:0004222(metalloendopeptidase activity);GO:0008237(metallopeptidase activity);GO:0006508(proteolysis);GO:0016787(hydrolase activity);GO:0008233(peptidase activity);GO:0046872(metal ion binding);GO:0008270(zinc ion binding);GO:0005509(calcium ion binding);GO:0005509(calcium ion binding)	NA	NA	NA	tolloid like 2 [Source:HGNC Symbol;Acc:HGNC:11844]	4.34892	4.69384	31.4916	19.6608	30.5492	0.11068	-3.17553	2.71473e-26	9.33347e-25	down	yes
ENSGALG00000010311	NAV3	ENSGALT00000016778	GO:0005524(ATP binding);GO:0008017(microtubule binding);GO:0007026(negative regulation of microtubule depolymerization);GO:0030336(negative regulation of cell migration);GO:0031116(positive regulation of microtubule polymerization);GO:0032703(negative regulation of interleukin-2 production);GO:1905929(positive regulation of invadopodium disassembly);GO:1990752(microtubule end)	NA	NA	NA	neuron navigator 3 [Source:HGNC Symbol;Acc:HGNC:15998]	24.0993	21.9007	93.7767	79.7793	78.9231	0.182193	-2.45646	7.16087e-26	2.40587e-24	down	yes
ENSGALG00000007582	DPYSL3	ENSGALT00000012260;ENSGALT00000063194	GO:0048678(response to axon injury);GO:0051491(positive regulation of filopodium assembly);GO:0010975(regulation of neuron projection development);GO:0051017(actin filament bundle assembly);GO:0016810(hydrolase activity, acting on carbon-nitrogen (but not peptide) bonds);GO:0030334(regulation of cell migration);GO:0016787(hydrolase activity);GO:0005737(cytoplasm);GO:0031005(filamin binding);GO:00…	NA	NA	NA	dihydropyrimidinase like 3 [Source:HGNC Symbol;Acc:HGNC:3015]	21.1948	19.1314	73.0713	69.0887	70.3256	0.189783	-2.39757	7.53424e-26	2.52492e-24	down	yes
ENSGALG00000034742	LIMA1	ENSGALT00000065098	NA	NA	NA	NA	LIM domain and actin binding 1 [Source:HGNC Symbol;Acc:HGNC:24636]	14.3986	17.1972	67.6981	57.2984	60.4881	0.170342	-2.55349	1.90827e-25	6.26846e-24	down	yes
ENSGALG00000014261	UCHL1	ENSGALT00000023065;ENSGALT00000054356;ENSGALT00000090178;ENSGALT00000050783	GO:0005737(cytoplasm);GO:0016579(protein deubiquitination);GO:0006511(ubiquitin-dependent protein catabolic process);GO:0006508(proteolysis);GO:0036459(thiol-dependent ubiquitinyl hydrolase activity);GO:0016787(hydrolase activity);GO:0016874(ligase activity);GO:0008234(cysteine-type peptidase activity);GO:0008233(peptidase activity);GO:0004843(thiol-dependent ubiquitin-specific protease activity)…	NA	NA	NA	ubiquitin C-terminal hydrolase L1 [Source:HGNC Symbol;Acc:HGNC:12513]	4.42465	5.73359	50.7118	33.1975	33.2287	0.0867203	-3.52749	2.8057e-25	9.19369e-24	down	yes
ENSGALG00000037943	PRKCB	ENSGALT00000078523;ENSGALT00000056316;ENSGALT00000063362	GO:0042113(B cell activation);GO:0005634(nucleus);GO:0045766(positive regulation of angiogenesis);GO:0043123(positive regulation of I-kappaB kinase/NF-kappaB signaling);GO:0050853(B cell receptor signaling pathway);GO:0030374(ligand-dependent nuclear receptor transcription coactivator activity);GO:0003682(chromatin binding);GO:0042393(histone binding);GO:0005737(cytoplasm);GO:0005886(plasma membr…	04010(MAPK signaling pathway);04012(ErbB signaling pathway);04310(Wnt signaling pathway);04370(VEGF signaling pathway);04020(Calcium signaling pathway);04070(Phosphatidylinositol signaling system);04150(mTOR signaling pathway);04510(Focal adhesion);04540(Gap junction);04912(GnRH signaling pathway);04916(Melanogenesis);04270(Vascular smooth muscle contraction);04933(AGE-RAGE signaling pathway in d…	K19662	EC:2.7.11.13	protein kinase C beta [Source:HGNC Symbol;Acc:HGNC:9395]	3.51267	3.55367	18.9735	19.0668	18.8876	0.124128	-3.0101	3.7335e-25	1.20847e-23	down	yes
ENSGALG00000011269	EPYC	ENSGALT00000018390;ENSGALT00000076046	GO:0007409(axonogenesis);GO:0005578(proteinaceous extracellular matrix);GO:0005615(extracellular space);GO:0005576(extracellular region);GO:0005576(extracellular region)	NA	NA	NA	epiphycan [Source:HGNC Symbol;Acc:HGNC:3053]	0.640519	1.0151	13.1013	17.2121	10.1479	0.0409187	-4.6111	4.72741e-25	1.52275e-23	down	yes
ENSGALG00000014233	FBLN1	ENSGALT00000023014;ENSGALT00000084705	GO:0071953(elastic fiber);GO:0070062(extracellular exosome);GO:0031012(extracellular matrix);GO:0005615(extracellular space);GO:0005604(basement membrane);GO:0005578(proteinaceous extracellular matrix);GO:0005577(fibrinogen complex);GO:2000647(negative regulation of stem cell proliferation);GO:2000146(negative regulation of cell motility);GO:1900025(negative regulation of substrate adhesion-depen…	NA	NA	NA	fibulin 1 [Source:HGNC Symbol;Acc:HGNC:3600]	27.8885	28.0996	93.6963	95.2627	109.715	0.187455	-2.41538	7.27729e-25	2.31599e-23	down	yes
ENSGALG00000033781	FEN1	ENSGALT00000065146	GO:0005654(nucleoplasm);GO:0004519(endonuclease activity);GO:0006260(DNA replication);GO:0004527(exonuclease activity);GO:0004518(nuclease activity);GO:0016788(hydrolase activity, acting on ester bonds);GO:0090502(RNA phosphodiester bond hydrolysis, endonucleolytic);GO:0005730(nucleolus);GO:0006974(cellular response to DNA damage stimulus);GO:0006281(DNA repair);GO:0016787(hydrolase activity);GO:…	03030(DNA replication);03410(Base excision repair);03450(Non-homologous end-joining)	K04799	EC:3.-.-.-	Flap endonuclease 1 [Source:UniProtKB/Swiss-Prot;Acc:Q5ZLN4]	9.75227	9.54519	36.4947	34.4737	36.6501	0.179314	-2.47944	1.20202e-24	3.77115e-23	down	yes
ENSGALG00000037953	TUBA1A	ENSGALT00000056511;ENSGALT00000050719;ENSGALT00000059475;ENSGALT00000085368;ENSGALT00000063440;ENSGALT00000055441;ENSGALT00000080486	GO:0055037(recycling endosome);GO:0043209(myelin sheath);GO:0005874(microtubule);GO:0005634(nucleus);GO:0015630(microtubule cytoskeleton);GO:0070062(extracellular exosome);GO:0005881(cytoplasmic microtubule);GO:0036464(cytoplasmic ribonucleoprotein granule);GO:0036464(cytoplasmic ribonucleoprotein granule)	04145(Phagosome);04210(Apoptosis);04530(Tight junction);04540(Gap junction);04540(Gap junction)	K07374	NA	tubulin alpha 1a [Source:HGNC Symbol;Acc:HGNC:20766]	124.357	122.151	397.73	417.501	437.792	0.196731	-2.3457	1.32019e-24	4.11272e-23	down	yes
ENSGALG00000011164	CHN2	ENSGALT00000018199	GO:0043087(regulation of GTPase activity);GO:0051056(regulation of small GTPase mediated signal transduction);GO:0005096(GTPase activator activity);GO:0043547(positive regulation of GTPase activity);GO:0005737(cytoplasm);GO:0046872(metal ion binding);GO:0035556(intracellular signal transduction);GO:0007165(signal transduction)	NA	NA	NA	chimerin 2 [Source:HGNC Symbol;Acc:HGNC:1944]	8.09979	8.90446	36.1195	43.3972	45.2562	0.136282	-2.87534	1.35304e-24	4.20521e-23	down	yes
ENSGALG00000007131		ENSGALT00000011553	GO:0031492(nucleosomal DNA binding);GO:0000785(chromatin);GO:0005634(nucleus);GO:0003677(DNA binding)	NA	NA	NA	Non-histone chromosomal protein HMG-14A [Source:UniProtKB/Swiss-Prot;Acc:P12902]	59.3366	69.2086	221.272	228.796	252.93	0.182853	-2.45125	1.41932e-24	4.40088e-23	down	yes
ENSGALG00000040586		ENSGALT00000084578;ENSGALT00000084382;ENSGALT00000088140;ENSGALT00000046954;ENSGALT00000088408;ENSGALT00000084701;ENSGALT00000083022	NA	04145(Phagosome);04210(Apoptosis);04530(Tight junction);04540(Gap junction);04540(Gap junction)	K07374	NA		26.6815	32.1285	108.87	99.8524	111.255	0.183794	-2.44383	1.5092e-24	4.66867e-23	down	yes
ENSGALG00000016278	PRIM2	ENSGALT00000026244;ENSGALT00000085918;ENSGALT00000062913	GO:0019899(enzyme binding);GO:0005515(protein binding);GO:0071897(DNA biosynthetic process);GO:0003887(DNA-directed DNA polymerase activity);GO:0006260(DNA replication);GO:0006269(DNA replication, synthesis of RNA primer);GO:0016779(nucleotidyltransferase activity);GO:0003899(DNA-directed 5'-3' RNA polymerase activity);GO:0003697(single-stranded DNA binding);GO:0051539(4 iron, 4 sulfur cluster bi…	00230(Purine metabolism);00240(Pyrimidine metabolism);03030(DNA replication);03030(DNA replication)	K02685	EC:2.7.7.-	DNA primase subunit 2 [Source:HGNC Symbol;Acc:HGNC:9370]	2.90897	3.19426	14.5644	14.5618	12.7815	0.145635	-2.77957	1.64481e-24	5.06455e-23	down	yes
ENSGALG00000002781	BRCA1	ENSGALT00000004392	GO:0031436(BRCA1-BARD1 complex);GO:0070531(BRCA1-A complex);GO:0071158(positive regulation of cell cycle arrest);GO:0045717(negative regulation of fatty acid biosynthetic process);GO:0043009(chordate embryonic development);GO:0035066(positive regulation of histone acetylation);GO:0035067(negative regulation of histone acetylation);GO:0006974(cellular response to DNA damage stimulus);GO:0000724(do…	04120(Ubiquitin mediated proteolysis);03440(Homologous recombination);03460(Fanconi anemia pathway)	K10605	EC:2.3.2.27	BRCA1, DNA repair associated [Source:HGNC Symbol;Acc:HGNC:1100]	5.8623	5.73749	22.2186	19.0747	22.7323	0.181174	-2.46455	2.06389e-24	6.32559e-23	down	yes
ENSGALG00000006723		ENSGALT00000063397;ENSGALT00000010875;ENSGALT00000087867	GO:0009240(isopentenyl diphosphate biosynthetic process);GO:0004452(isopentenyl-diphosphate delta-isomerase activity);GO:0008299(isoprenoid biosynthetic process);GO:0005737(cytoplasm);GO:0016787(hydrolase activity);GO:0016787(hydrolase activity)	00900(Terpenoid backbone biosynthesis);00900(Terpenoid backbone biosynthesis)	K01823	EC:5.3.3.2		5.10574	5.38824	38.7727	31.7031	23.483	0.111687	-3.16247	2.15617e-24	6.59322e-23	down	yes
ENSGALG00000027757	ARL4A	ENSGALT00000043011	GO:0007264(small GTPase mediated signal transduction);GO:0005525(GTP binding);GO:0005622(intracellular);GO:0000166(nucleotide binding);GO:0005634(nucleus);GO:0005654(nucleoplasm);GO:0005730(nucleolus);GO:0005829(cytosol);GO:0005886(plasma membrane)	NA	NA	NA	ADP ribosylation factor like GTPase 4A [Source:HGNC Symbol;Acc:HGNC:695]	37.5185	32.8481	141.341	214.533	192.947	0.128214	-2.96337	3.63175e-24	1.10543e-22	down	yes
ENSGALG00000008233	BUB1	ENSGALT00000013400	GO:0016020(membrane);GO:0005829(cytosol);GO:0005654(nucleoplasm);GO:0000942(condensed nuclear chromosome outer kinetochore);GO:0000778(condensed nuclear chromosome kinetochore);GO:0000777(condensed chromosome kinetochore);GO:0000776(kinetochore);GO:0051983(regulation of chromosome segregation);GO:0051754(meiotic sister chromatid cohesion, centromeric);GO:0007063(regulation of sister chromatid coh…	04110(Cell cycle);04114(Oocyte meiosis);04914(Progesterone-mediated oocyte maturation)	K02178	EC:2.7.11.1	BUB1 mitotic checkpoint serine/threonine kinase [Source:HGNC Symbol;Acc:HGNC:1148]	7.07616	8.20318	31.6355	25.8099	32.7531	0.169397	-2.56152	4.37191e-24	1.32768e-22	down	yes
ENSGALG00000015691	SMC2	ENSGALT00000037609	GO:0070062(extracellular exosome);GO:0005737(cytoplasm);GO:0005694(chromosome);GO:0005730(nucleolus);GO:0005634(nucleus);GO:0000796(condensin complex);GO:0000793(condensed chromosome);GO:0000228(nuclear chromosome);GO:0051383(kinetochore organization);GO:0045132(meiotic chromosome segregation);GO:0010032(meiotic chromosome condensation);GO:0007076(mitotic chromosome condensation);GO:0046982(prote…	NA	NA	NA	structural maintenance of chromosomes 2 [Source:HGNC Symbol;Acc:HGNC:14011]	8.63711	9.86363	32.1057	31.5061	34.4751	0.188616	-2.40648	1.47378e-23	4.34635e-22	down	yes
ENSGALG00000002107		ENSGALT00000003289	GO:0005813(centrosome);GO:0046604(positive regulation of mitotic centrosome separation);GO:0007051(spindle organization);GO:0046907(intracellular transport);GO:0006405(RNA export from nucleus);GO:0008536(Ran GTPase binding);GO:0000082(G1/S transition of mitotic cell cycle);GO:0006511(ubiquitin-dependent protein catabolic process);GO:0006606(protein import into nucleus);GO:0005096(GTPase activator…	NA	NA	NA		28.5969	28.5336	104.602	94.2314	106.007	0.187411	-2.41573	1.54482e-23	4.54573e-22	down	yes
ENSGALG00000032270	NCAPH	ENSGALT00000049116	GO:0016020(membrane);GO:0005829(cytosol);GO:0005634(nucleus);GO:0007076(mitotic chromosome condensation);GO:0000796(condensin complex)	NA	NA	NA	non-SMC condensin I complex, subunit H [Source:RefSeq peptide;Acc:NP_001244261]	7.92527	6.9228	29.9845	27.0869	30.1142	0.170304	-2.55382	1.68076e-23	4.91308e-22	down	yes
ENSGALG00000008763	SSX2IP	ENSGALT00000014255	GO:0043234(protein complex);GO:0036064(ciliary basal body);GO:0034451(centriolar satellite);GO:0031252(cell leading edge);GO:2000145(regulation of cell motility);GO:0060271(cilium assembly);GO:0035735(intraciliary transport involved in cilium assembly);GO:0035020(regulation of Rac protein signal transduction);GO:0007098(centrosome cycle)	04520(Adherens junction)	K06085	NA	SSX family member 2 interacting protein [Source:HGNC Symbol;Acc:HGNC:16509]	2.35801	2.57643	15.0255	15.1324	14.879	0.109564	-3.19015	2.10038e-23	6.11276e-22	down	yes
ENSGALG00000005808	KREMEN1	ENSGALT00000009327	GO:0007154(cell communication);GO:0016020(membrane);GO:0016055(Wnt signaling pathway);GO:0016021(integral component of membrane);GO:0006915(apoptotic process);GO:0030279(negative regulation of ossification);GO:0060173(limb development);GO:0090090(negative regulation of canonical Wnt signaling pathway)	NA	NA	NA	kringle containing transmembrane protein 1 [Source:HGNC Symbol;Acc:HGNC:17550]	11.7369	10.1289	44.3829	46.7478	41.1059	0.165353	-2.59637	3.06913e-23	8.8931e-22	down	yes
ENSGALG00000000433		ENSGALT00000086363;ENSGALT00000083391;ENSGALT00000038318	GO:0005874(microtubule);GO:0007017(microtubule-based process);GO:0003924(GTPase activity);GO:0005525(GTP binding);GO:0005856(cytoskeleton);GO:0005737(cytoplasm);GO:0000166(nucleotide binding);GO:0007010(cytoskeleton organization);GO:0005200(structural constituent of cytoskeleton);GO:0005200(structural constituent of cytoskeleton)	04145(Phagosome);04210(Apoptosis);04530(Tight junction);04540(Gap junction);04540(Gap junction)	K07374	NA		27.3155	27.0566	84.6593	92.1062	91.9753	0.202322	-2.30528	3.09506e-23	8.94871e-22	down	yes
ENSGALG00000029292	PCNA	ENSGALT00000050446;ENSGALT00000085735;ENSGALT00000083492;ENSGALT00000050211	GO:0019985(translesion synthesis);GO:0006281(DNA repair);GO:0006275(regulation of DNA replication);GO:0019899(enzyme binding);GO:0006272(leading strand elongation);GO:0006260(DNA replication);GO:0006298(mismatch repair);GO:0005634(nucleus);GO:0005654(nucleoplasm);GO:0003677(DNA binding);GO:0000701(purine-specific mismatch base pair DNA N-glycosylase activity);GO:0003682(chromatin binding);GO:0003…	03030(DNA replication);03410(Base excision repair);03420(Nucleotide excision repair);03430(Mismatch repair);04110(Cell cycle);04530(Tight junction);04530(Tight junction)	K04802	NA	Proliferating cell nuclear antigen [Source:UniProtKB/Swiss-Prot;Acc:Q9DEA3]	39.9067	41.4249	135.558	125.394	137.965	0.203881	-2.2942	4.04002e-23	1.15799e-21	down	yes
ENSGALG00000004161	CCNB2	ENSGALT00000089916;ENSGALT00000089586;ENSGALT00000006616;ENSGALT00000048182	GO:0016020(membrane);GO:0005829(cytosol);GO:0015630(microtubule cytoskeleton);GO:0005813(centrosome);GO:0048538(thymus development);GO:0043029(T cell homeostasis);GO:0040007(growth);GO:0045296(cadherin binding);GO:0060317(cardiac epithelial to mesenchymal transition);GO:0007049(cell cycle);GO:0051301(cell division);GO:0005634(nucleus);GO:0005634(nucleus)	04068(FoxO signaling pathway);04110(Cell cycle);04114(Oocyte meiosis);04115(p53 signaling pathway);04218(Cellular senescence);04914(Progesterone-mediated oocyte maturation);04914(Progesterone-mediated oocyte maturation)	K21770	NA	cyclin B2 [Source:HGNC Symbol;Acc:HGNC:1580]	16.6568	16.7969	59.7883	56.4796	59.1658	0.190692	-2.39069	4.13566e-23	1.18285e-21	down	yes
ENSGALG00000031487	FSTL4	ENSGALT00000051204;ENSGALT00000050079	GO:0030141(secretory granule);GO:0048403(brain-derived neurotrophic factor binding);GO:0031549(negative regulation of brain-derived neurotrophic factor receptor signaling pathway);GO:0048670(regulation of collateral sprouting);GO:0048671(negative regulation of collateral sprouting);GO:0061000(negative regulation of dendritic spine development);GO:0061000(negative regulation of dendritic spine dev…	NA	NA	NA	follistatin like 4 [Source:HGNC Symbol;Acc:HGNC:21389]	2.95037	4.84261	19.8862	19.4233	21.0543	0.1291	-2.95344	4.83762e-23	1.37768e-21	down	yes
ENSGALG00000016797	FHL2	ENSGALT00000061172;ENSGALT00000027119;ENSGALT00000083922	GO:0005925(focal adhesion);GO:0005634(nucleus);GO:0060347(heart trabecula formation);GO:0055015(ventricular cardiac muscle cell development);GO:0055014(atrial cardiac muscle cell development);GO:0045892(negative regulation of transcription, DNA-templated);GO:0043066(negative regulation of apoptotic process);GO:0009725(response to hormone);GO:0006357(regulation of transcription from RNA polymerase…	NA	NA	NA	four and a half LIM domains 2 [Source:HGNC Symbol;Acc:HGNC:3703]	10.9827	7.87771	42.2564	39.3282	40.7225	0.154205	-2.69708	6.60474e-23	1.86493e-21	down	yes
ENSGALG00000005930	PLS3	ENSGALT00000072838;ENSGALT00000009540;ENSGALT00000085774	GO:0005886(plasma membrane);GO:0005829(cytosol);GO:0060348(bone development);GO:0032432(actin filament bundle);GO:0051639(actin filament network formation);GO:0005884(actin filament);GO:0051764(actin crosslink formation);GO:0051017(actin filament bundle assembly);GO:0051015(actin filament binding);GO:0005737(cytoplasm);GO:0003779(actin binding);GO:0005509(calcium ion binding);GO:0005509(calcium i…	NA	NA	NA	plastin 3 [Source:HGNC Symbol;Acc:HGNC:9091]	33.9421	34.5437	107.953	111.914	108.631	0.208482	-2.26201	7.50153e-23	2.10471e-21	down	yes
ENSGALG00000012165		ENSGALT00000019869	GO:0006470(protein dephosphorylation);GO:0023052(signaling);GO:0006461(protein complex assembly)	NA	NA	NA		10.6744	11.3138	37.824	37.5831	42.8678	0.185907	-2.42734	9.60538e-23	2.67239e-21	down	yes
ENSGALG00000030597	KIF11	ENSGALT00000064835;ENSGALT00000089205;ENSGALT00000085461	GO:0019901(protein kinase binding);GO:0005819(spindle);GO:0032403(protein complex binding);GO:0005874(microtubule);GO:0016020(membrane);GO:0046602(regulation of mitotic centrosome separation);GO:0005829(cytosol);GO:0000922(spindle pole);GO:0005876(spindle microtubule);GO:0007051(spindle organization);GO:0007100(mitotic centrosome separation);GO:0051225(spindle assembly);GO:0090307(mitotic spindle…	NA	NA	NA	kinesin family member 11 [Source:HGNC Symbol;Acc:HGNC:6388]	18.6945	17.1113	57.3119	57.0771	59.8206	0.205533	-2.28256	1.04302e-22	2.8958e-21	down	yes
ENSGALG00000006267	TPX2	ENSGALT00000084713;ENSGALT00000088315;ENSGALT00000010129	GO:0019901(protein kinase binding);GO:0005819(spindle);GO:0005654(nucleoplasm);GO:0000922(spindle pole);GO:0090307(mitotic spindle assembly);GO:0060236(regulation of mitotic spindle organization);GO:0032147(activation of protein kinase activity);GO:0061676(importin-alpha family protein binding);GO:0015630(microtubule cytoskeleton);GO:0043203(axon hillock);GO:0072686(mitotic spindle);GO:0005874(mi…	NA	NA	NA	TPX2, microtubule nucleation factor [Source:HGNC Symbol;Acc:HGNC:1249]	9.21056	9.38536	30.6656	34.0272	34.929	0.186665	-2.42147	1.4756e-22	4.05439e-21	down	yes
ENSGALG00000023793		ENSGALT00000039855	NA	NA	NA	NA		5.69829	6.15903	43.5049	30.9209	44.8602	0.0994025	-3.33057	1.88663e-22	5.17303e-21	down	yes
ENSGALG00000005400	CACNA2D3	ENSGALT00000008674	NA	04010(MAPK signaling pathway);04260(Cardiac muscle contraction);04261(Adrenergic signaling in cardiomyocytes)	K04860	NA	calcium voltage-gated channel auxiliary subunit alpha2delta 3 [Source:HGNC Symbol;Acc:HGNC:15460]	0.814979	1.02455	5.97601	7.0732	7.08647	0.0913569	-3.45234	2.27208e-22	6.19154e-21	down	yes
ENSGALG00000001491		ENSGALT00000002261	GO:0000799(nuclear condensin complex);GO:0000779(condensed chromosome, centromeric region);GO:0051304(chromosome separation);GO:0010032(meiotic chromosome condensation);GO:0007076(mitotic chromosome condensation);GO:0042393(histone binding);GO:0003682(chromatin binding)	NA	NA	NA		5.35098	5.28092	19.5911	21.4597	21.588	0.169734	-2.55866	2.90028e-22	7.87109e-21	down	yes
ENSGALG00000027887		ENSGALT00000043835	GO:0005581(collagen trimer);GO:0005576(extracellular region)	NA	NA	NA		41.2352	49.0762	154.11	168.717	162.714	0.186002	-2.42661	3.42834e-22	9.2287e-21	down	yes
ENSGALG00000003475	ACLY	ENSGALT00000039950;ENSGALT00000070919	GO:0006101(citrate metabolic process);GO:0009346(citrate lyase complex);GO:0006085(acetyl-CoA biosynthetic process);GO:0048037(cofactor binding);GO:0046912(transferase activity, transferring acyl groups, acyl groups converted into alkyl on transfer);GO:0003878(ATP citrate synthase activity);GO:0006633(fatty acid biosynthetic process);GO:0005829(cytosol);GO:0006629(lipid metabolic process);GO:0005…	00020(Citrate cycle (TCA cycle));00020(Citrate cycle (TCA cycle))	K01648	EC:2.3.3.8	ATP citrate lyase [Source:HGNC Symbol;Acc:HGNC:115]	13.5381	13.0218	49.0605	39.8078	47.9942	0.194063	-2.3654	3.99678e-22	1.07371e-20	down	yes
ENSGALG00000031331	PKIG	ENSGALT00000047845	GO:0000122(negative regulation of transcription from RNA polymerase II promoter);GO:0006469(negative regulation of protein kinase activity);GO:0004862(cAMP-dependent protein kinase inhibitor activity);GO:0042308(negative regulation of protein import into nucleus)	NA	NA	NA	cAMP-dependent protein kinase inhibitor gamma [Source:HGNC Symbol;Acc:HGNC:9019]	18.5	20.7357	80.2241	86.9192	87.9835	0.153789	-2.70097	4.74833e-22	1.27047e-20	down	yes
ENSGALG00000031440	PTPRU	ENSGALT00000075185;ENSGALT00000078187	GO:0034394(protein localization to cell surface);GO:0005911(cell-cell junction);GO:0008285(negative regulation of cell proliferation);GO:0004725(protein tyrosine phosphatase activity);GO:0030336(negative regulation of cell migration);GO:0060070(canonical Wnt signaling pathway);GO:0008013(beta-catenin binding);GO:0006470(protein dephosphorylation);GO:0034109(homotypic cell-cell adhesion);GO:009860…	NA	NA	NA	protein tyrosine phosphatase, receptor type U [Source:HGNC Symbol;Acc:HGNC:9683]	5.84657	7.48833	28.7285	29.336	23.3209	0.163849	-2.60956	6.44418e-22	1.71728e-20	down	yes
ENSGALG00000008962	MSH2	ENSGALT00000014573	GO:0042771(intrinsic apoptotic signaling pathway in response to DNA damage by p53 class mediator);GO:0010165(response to X-ray);GO:0032302(MutSbeta complex);GO:0032301(MutSalpha complex);GO:0016020(membrane);GO:0005634(nucleus);GO:0000784(nuclear chromosome, telomeric region);GO:0051096(positive regulation of helicase activity);GO:0045910(negative regulation of DNA recombination);GO:0045190(isoty…	03430(Mismatch repair)	K08735	NA	mutS homolog 2 [Source:HGNC Symbol;Acc:HGNC:7325]	11.752	13.466	41.6289	42.6635	45.5564	0.19421	-2.36431	7.62079e-22	2.02676e-20	down	yes
ENSGALG00000010255		ENSGALT00000055820;ENSGALT00000016679	NA	NA	NA	NA		5.63335	4.44899	19.2967	21.0181	21.7379	0.16248	-2.62166	1.31002e-21	3.44946e-20	down	yes
ENSGALG00000030587		ENSGALT00000050761;ENSGALT00000080936	NA	NA	NA	NA		50.6753	64.9707	194.174	211.775	222.774	0.183938	-2.44271	1.74944e-21	4.52568e-20	down	yes
ENSGALG00000005809	SEPT2	ENSGALT00000009328	GO:0097730(non-motile cilium);GO:0097227(sperm annulus);GO:0070062(extracellular exosome);GO:0032391(photoreceptor connecting cilium);GO:0031105(septin complex);GO:0015629(actin cytoskeleton);GO:0005930(axoneme);GO:0005829(cytosol);GO:0005737(cytoplasm);GO:0005730(nucleolus);GO:0005634(nucleus);GO:0045296(cadherin binding);GO:0051301(cell division);GO:0007049(cell cycle);GO:0005525(GTP binding);G…	NA	NA	NA	septin 2 [Source:HGNC Symbol;Acc:HGNC:7729]	11.7155	14.8881	58.4905	52.1766	62.2834	0.153822	-2.70067	1.84447e-21	4.76226e-20	down	yes
ENSGALG00000012546	MCM5	ENSGALT00000020490;ENSGALT00000054416;ENSGALT00000084159	GO:0042555(MCM complex);GO:0003678(DNA helicase activity);GO:0006260(DNA replication);GO:0003682(chromatin binding);GO:0006270(DNA replication initiation);GO:0032508(DNA duplex unwinding);GO:0004386(helicase activity);GO:0016787(hydrolase activity);GO:0005634(nucleus);GO:0003677(DNA binding);GO:0005524(ATP binding);GO:0000166(nucleotide binding);GO:0003688(DNA replication origin binding);GO:00007…	03030(DNA replication);04110(Cell cycle);04110(Cell cycle)	K02209	EC:3.6.4.12	minichromosome maintenance complex component 5 [Source:HGNC Symbol;Acc:HGNC:6948]	16.3345	17.4798	54.6141	56.2808	54.0804	0.204965	-2.28655	2.07809e-21	5.34465e-20	down	yes
ENSGALG00000033591		ENSGALT00000047889	NA	NA	NA	NA		2.03426	1.59079	14.217	10.0159	14.5363	0.0935036	-3.41883	2.12193e-21	5.44685e-20	down	yes
ENSGALG00000035493	POC1B	ENSGALT00000080099;ENSGALT00000056954;ENSGALT00000086204	NA	NA	NA	NA	POC1 centriolar protein B [Source:HGNC Symbol;Acc:HGNC:30836]	3.32916	4.31983	17.0985	15.9326	16.5914	0.154143	-2.69765	3.12211e-21	7.93746e-20	down	yes
ENSGALG00000006037	MCM2	ENSGALT00000009723;ENSGALT00000084014;ENSGALT00000089351	GO:0042555(MCM complex);GO:0015630(microtubule cytoskeleton);GO:0005829(cytosol);GO:0005737(cytoplasm);GO:0005664(nuclear origin of replication recognition complex);GO:0005654(nucleoplasm);GO:0005634(nucleus);GO:0000785(chromatin);GO:0000784(nuclear chromosome, telomeric region);GO:0090102(cochlea development);GO:0071353(cellular response to interleukin-4);GO:0006915(apoptotic process);GO:0006334…	03030(DNA replication);04110(Cell cycle);04110(Cell cycle)	K02540	EC:3.6.4.12	DNA replication licensing factor MCM2 [Source:RefSeq peptide;Acc:NP_001006139]	14.1893	14.0773	51.9557	42.5958	45.2941	0.202128	-2.30666	3.48875e-21	8.85261e-20	down	yes
ENSGALG00000002855	SARDH	ENSGALT00000049522;ENSGALT00000004499;ENSGALT00000073692	GO:0005739(mitochondrion);GO:0008480(sarcosine dehydrogenase activity);GO:1901053(sarcosine catabolic process);GO:0005759(mitochondrial matrix);GO:0016491(oxidoreductase activity);GO:0055114(oxidation-reduction process);GO:0055114(oxidation-reduction process)	00260(Glycine, serine and threonine metabolism);00260(Glycine, serine and threonine metabolism)	K00314	EC:1.5.8.3	sarcosine dehydrogenase [Source:HGNC Symbol;Acc:HGNC:10536]	26.4749	43.8354	171.481	156.817	164.525	0.142669	-2.80926	4.60583e-21	1.16205e-19	down	yes
ENSGALG00000040896	FASN	ENSGALT00000053340;ENSGALT00000086182;ENSGALT00000047769;ENSGALT00000076853	NA	01212(Fatty acid metabolism);00061(Fatty acid biosynthesis);04910(Insulin signaling pathway);04910(Insulin signaling pathway)	K00665	EC:2.3.1.85	fatty acid synthase [Source:HGNC Symbol;Acc:HGNC:3594]	13.1568	15.3364	72.8171	48.7413	54.1032	0.162205	-2.62411	5.12489e-21	1.28568e-19	down	yes
ENSGALG00000010120		ENSGALT00000016462;ENSGALT00000051901	GO:0005871(kinesin complex);GO:0007018(microtubule-based movement);GO:0016887(ATPase activity);GO:0003777(microtubule motor activity);GO:0005874(microtubule);GO:0008017(microtubule binding);GO:0003774(motor activity);GO:0005524(ATP binding);GO:0000166(nucleotide binding);GO:0000775(chromosome, centromeric region);GO:0000775(chromosome, centromeric region)	NA	NA	NA		4.1525	3.94197	17.4627	16.6989	18.4606	0.153822	-2.70066	5.68394e-21	1.42056e-19	down	yes
ENSGALG00000007744	CASS4	ENSGALT00000071291;ENSGALT00000062852;ENSGALT00000012554	NA	NA	NA	NA	Cas scaffolding protein family member 4 [Source:HGNC Symbol;Acc:HGNC:15878]	5.39688	7.33398	24.9246	29.3365	32.008	0.147571	-2.76051	6.87889e-21	1.70955e-19	down	yes
ENSGALG00000017394	INSIG1	ENSGALT00000028082	GO:0032937(SREBP-SCAP-Insig complex);GO:0005783(endoplasmic reticulum);GO:1901303(negative regulation of cargo loading into COPII-coated vesicle);GO:0060363(cranial suture morphogenesis);GO:0060021(palate development);GO:0045717(negative regulation of fatty acid biosynthetic process);GO:0045599(negative regulation of fat cell differentiation);GO:0042474(middle ear morphogenesis);GO:0042472(inner …	NA	NA	NA	Insulin-induced gene 1 protein [Source:UniProtKB/Swiss-Prot;Acc:Q5ZMT9]	6.98033	8.78389	49.3088	33.7337	31.941	0.1371	-2.8667	1.4289e-20	3.51166e-19	down	yes
ENSGALG00000029140	CRABP2	ENSGALT00000045442	GO:0001972(retinoic acid binding);GO:0006810(transport);GO:0008289(lipid binding);GO:0005737(cytoplasm);GO:0005634(nucleus);GO:0035115(embryonic forelimb morphogenesis);GO:0042573(retinoic acid metabolic process);GO:0048385(regulation of retinoic acid receptor signaling pathway);GO:0048672(positive regulation of collateral sprouting);GO:0005654(nucleoplasm);GO:0005829(cytosol);GO:0070062(extracel…	NA	NA	NA	cellular retinoic acid binding protein 2 [Source:HGNC Symbol;Acc:HGNC:2339]	17.4651	16.3037	122.403	90.6977	81.6401	0.114571	-3.12568	1.52167e-20	3.73272e-19	down	yes
ENSGALG00000016584	EGFL6	ENSGALT00000026770;ENSGALT00000075997;ENSGALT00000076480	GO:0005604(basement membrane);GO:0005578(proteinaceous extracellular matrix);GO:0030198(extracellular matrix organization);GO:0010811(positive regulation of cell-substrate adhesion);GO:0005509(calcium ion binding);GO:0016020(membrane);GO:0016020(membrane)	NA	NA	NA	EGF like domain multiple 6 [Source:HGNC Symbol;Acc:HGNC:3235]	57.4078	70.2984	223.303	231.121	201.65	0.194652	-2.36103	1.6887e-20	4.12722e-19	down	yes
ENSGALG00000004508	EYA2	ENSGALT00000007180;ENSGALT00000050872	GO:2001240(negative regulation of extrinsic apoptotic signaling pathway in absence of ligand);GO:0045739(positive regulation of DNA repair);GO:0016576(histone dephosphorylation);GO:0014706(striated muscle tissue development);GO:0004725(protein tyrosine phosphatase activity);GO:0048856(anatomical structure development);GO:0004721(phosphoprotein phosphatase activity);GO:0030154(cell differentiation…	NA	NA	NA	Gallus gallus eyes absent homolog 2 (Drosophila) (EYA2), mRNA. [Source:RefSeq mRNA;Acc:NM_204915]	7.80998	10.6693	36.2344	36.9967	35.2136	0.170403	-2.55298	1.78172e-20	4.34655e-19	down	yes
ENSGALG00000015729	LPAR1	ENSGALT00000025366;ENSGALT00000089257	GO:0030139(endocytic vesicle);GO:0009986(cell surface);GO:0005887(integral component of plasma membrane);GO:0005886(plasma membrane);GO:0005768(endosome);GO:0060326(cell chemotaxis);GO:0051496(positive regulation of stress fiber assembly);GO:0051482(positive regulation of cytosolic calcium ion concentration involved in phospholipase C-activating G-protein coupled signaling pathway);GO:0043410(pos…	04080(Neuroactive ligand-receptor interaction);04540(Gap junction);04540(Gap junction)	K04289	NA	lysophosphatidic acid receptor 1 [Source:HGNC Symbol;Acc:HGNC:3166]	13.9239	17.6996	62.6514	54.7259	54.7796	0.18369	-2.44466	1.84937e-20	4.5033e-19	down	yes
ENSGALG00000009690	CENPF	ENSGALT00000015897;ENSGALT00000084212	GO:0097539(ciliary transition fiber);GO:0045120(pronucleus);GO:0036064(ciliary basal body);GO:0030496(midbody);GO:0016363(nuclear matrix);GO:0005930(axoneme);GO:0005819(spindle);GO:0005813(centrosome);GO:0005737(cytoplasm);GO:0005654(nucleoplasm);GO:0005635(nuclear envelope);GO:0005634(nucleus);GO:0000940(condensed chromosome outer kinetochore);GO:0000922(spindle pole);GO:0000776(kinetochore);GO:…	NA	NA	NA	centromere protein F [Source:HGNC Symbol;Acc:HGNC:1857]	3.47361	3.46882	12.6959	11.2596	15.8019	0.17462	-2.51771	2.10694e-20	5.11173e-19	down	yes
ENSGALG00000002569	RAN	ENSGALT00000089271;ENSGALT00000084972;ENSGALT00000004055;ENSGALT00000063787;ENSGALT00000055724	GO:0055037(recycling endosome);GO:0006606(protein import into nucleus);GO:0005635(nuclear envelope);GO:0045296(cadherin binding);GO:0005654(nucleoplasm);GO:0000785(chromatin);GO:0005814(centriole);GO:0005730(nucleolus);GO:0030496(midbody);GO:0005525(GTP binding);GO:0003723(RNA binding);GO:0005737(cytoplasm);GO:0005634(nucleus);GO:0016020(membrane);GO:0043234(protein complex);GO:0046982(protein he…	03013(RNA transport);03008(Ribosome biogenesis in eukaryotes);03008(Ribosome biogenesis in eukaryotes)	K07936	NA	RAN, member RAS oncogene family [Source:HGNC Symbol;Acc:HGNC:9846]	33.9201	35.7862	111.768	100.279	111.636	0.215354	-2.21521	2.56492e-20	6.20018e-19	down	yes
ENSGALG00000004270	ALDH1A2	ENSGALT00000084591	GO:0042572(retinol metabolic process);GO:0001947(heart looping);GO:0021522(spinal cord motor neuron differentiation);GO:0004745(retinol dehydrogenase activity);GO:0001758(retinal dehydrogenase activity);GO:0003007(heart morphogenesis);GO:0005737(cytoplasm);GO:0071300(cellular response to retinoic acid);GO:0060324(face development);GO:0048738(cardiac muscle tissue development);GO:0048566(embryonic…	00830(Retinol metabolism)	K07249	EC:1.2.1.36	Retinal dehydrogenase 2 [Source:UniProtKB/Swiss-Prot;Acc:O93344]	24.006	21.5005	84.0916	71.9045	68.6389	0.202579	-2.30344	2.84241e-20	6.85848e-19	down	yes
ENSGALG00000026531		ENSGALT00000045313	GO:0005975(carbohydrate metabolic process);GO:0016051(carbohydrate biosynthetic process);GO:0008146(sulfotransferase activity);GO:0005794(Golgi apparatus);GO:0000139(Golgi membrane);GO:0016740(transferase activity);GO:0016021(integral component of membrane)	NA	NA	NA		18.6392	23.9984	84.5548	69.2617	79.6578	0.182622	-2.45307	4.26091e-20	1.01702e-18	down	yes
ENSGALG00000039448	NCAPD2	ENSGALT00000077042;ENSGALT00000050425;ENSGALT00000083650;ENSGALT00000089864	GO:0000228(nuclear chromosome);GO:0042393(histone binding);GO:0005737(cytoplasm);GO:0016020(membrane);GO:0005654(nucleoplasm);GO:0005829(cytosol);GO:0007076(mitotic chromosome condensation);GO:0000793(condensed chromosome);GO:0000796(condensin complex);GO:0000796(condensin complex)	NA	NA	NA	non-SMC condensin I complex subunit D2 [Source:HGNC Symbol;Acc:HGNC:24305]	10.0545	10.5525	37.0091	29.4022	35.6295	0.201949	-2.30794	7.11487e-20	1.6801e-18	down	yes
ENSGALG00000036787	HSD17B12	ENSGALT00000052390;ENSGALT00000052146	GO:0005578(proteinaceous extracellular matrix);GO:0005518(collagen binding);GO:0008201(heparin binding);GO:0030198(extracellular matrix organization);GO:0010811(positive regulation of cell-substrate adhesion);GO:0001968(fibronectin binding);GO:0001968(fibronectin binding)	01212(Fatty acid metabolism);00062(Fatty acid elongation);00140(Steroid hormone biosynthesis);01040(Biosynthesis of unsaturated fatty acids);01040(Biosynthesis of unsaturated fatty acids)	K10251	EC:1.1.1.62;EC:1.1.1.330	hydroxysteroid 17-beta dehydrogenase 12 [Source:HGNC Symbol;Acc:HGNC:18646]	6.45382	6.15758	29.5569	21.3118	22.7636	0.171275	-2.54561	8.89063e-20	2.08828e-18	down	yes
ENSGALG00000013420		ENSGALT00000021889;ENSGALT00000048905;ENSGALT00000090322;ENSGALT00000088517	GO:0006357(regulation of transcription from RNA polymerase II promoter);GO:0000981(RNA polymerase II transcription factor activity, sequence-specific DNA binding);GO:0030154(cell differentiation);GO:0009653(anatomical structure morphogenesis);GO:0005634(nucleus);GO:0043565(sequence-specific DNA binding);GO:0003700(transcription factor activity, sequence-specific DNA binding);GO:0006355(regulation…	04218(Cellular senescence);04218(Cellular senescence)	K09406	NA		4.11164	3.7455	16.057	13.5417	15.1262	0.175677	-2.509	5.15439e-19	1.15158e-17	down	yes
ENSGALG00000010031	ARHGAP10	ENSGALT00000016293	GO:0005829(cytosol);GO:0043066(negative regulation of apoptotic process);GO:0007010(cytoskeleton organization);GO:0005096(GTPase activator activity);GO:0043547(positive regulation of GTPase activity);GO:0007165(signal transduction)	NA	NA	NA	Rho GTPase activating protein 10 [Source:HGNC Symbol;Acc:HGNC:26099]	19.2191	17.1078	54.2819	60.3113	58.284	0.210131	-2.25064	7.26583e-19	1.59908e-17	down	yes
ENSGALG00000008444		ENSGALT00000040237;ENSGALT00000067484	GO:0005874(microtubule);GO:0007017(microtubule-based process);GO:0003924(GTPase activity);GO:0005525(GTP binding);GO:0005856(cytoskeleton);GO:0005737(cytoplasm);GO:0000166(nucleotide binding);GO:0007010(cytoskeleton organization);GO:0005200(structural constituent of cytoskeleton);GO:0005200(structural constituent of cytoskeleton)	04145(Phagosome);04210(Apoptosis);04530(Tight junction);04540(Gap junction);04540(Gap junction)	K07374	NA		121.933	120.135	346.169	341.902	364.407	0.229998	-2.12031	9.09367e-19	1.99145e-17	down	yes
ENSGALG00000013624		ENSGALT00000022165	GO:0048741(skeletal muscle fiber development);GO:0007605(sensory perception of sound)	NA	NA	NA		12.5907	11.4023	38.7595	51.5447	39.5571	0.184758	-2.43629	1.22151e-18	2.64881e-17	down	yes
ENSGALG00000032287	ATP2A2	ENSGALT00000085704;ENSGALT00000087059;ENSGALT00000072840;ENSGALT00000062494	GO:0044548(S100 protein binding);GO:0005789(endoplasmic reticulum membrane);GO:0005783(endoplasmic reticulum);GO:0016529(sarcoplasmic reticulum);GO:0005654(nucleoplasm);GO:0016020(membrane);GO:0019899(enzyme binding);GO:0034599(cellular response to oxidative stress);GO:0014883(transition between fast and slow fiber);GO:0002026(regulation of the force of heart contraction);GO:0014898(cardiac muscl…	04020(Calcium signaling pathway);04020(Calcium signaling pathway)	K05853	EC:3.6.3.8	ATPase sarcoplasmic/endoplasmic reticulum Ca2+ transporting 2 [Source:HGNC Symbol;Acc:HGNC:812]	66.4511	72.5197	214.479	197.075	200.761	0.22696	-2.13949	1.82559e-18	3.92664e-17	down	yes
ENSGALG00000013208		ENSGALT00000021577	GO:0005871(kinesin complex);GO:0016192(vesicle-mediated transport);GO:0007018(microtubule-based movement);GO:0016887(ATPase activity);GO:0003777(microtubule motor activity);GO:0008017(microtubule binding);GO:0003774(motor activity);GO:0005524(ATP binding);GO:0000166(nucleotide binding)	NA	NA	NA		4.12041	5.09889	16.6067	14.1801	16.1915	0.196246	-2.34927	1.99415e-18	4.27139e-17	down	yes
ENSGALG00000036645	KIF15	ENSGALT00000058182;ENSGALT00000051899	GO:0016020(membrane);GO:0016020(membrane)	NA	NA	NA	kinesin family member 15 [Source:HGNC Symbol;Acc:HGNC:17273]	6.13674	7.08008	20.305	22.5346	24.1476	0.197304	-2.34151	2.08628e-18	4.45846e-17	down	yes
ENSGALG00000007354	CIT	ENSGALT00000011895	GO:0016020(membrane);GO:0051402(neuron apoptotic process);GO:0032467(positive regulation of cytokinesis);GO:0000281(mitotic cytokinesis);GO:0097110(scaffold protein binding);GO:0030165(PDZ domain binding);GO:0005622(intracellular);GO:0046872(metal ion binding);GO:0035556(intracellular signal transduction);GO:0006468(protein phosphorylation);GO:0016740(transferase activity);GO:0005524(ATP binding)…	NA	NA	NA	citron rho-interacting serine/threonine kinase [Source:HGNC Symbol;Acc:HGNC:1985]	3.23993	2.69359	10.9731	10.4673	10.268	0.187128	-2.4179	2.43814e-18	5.18534e-17	down	yes
ENSGALG00000006041	BNC1	ENSGALT00000009730	GO:0005654(nucleoplasm);GO:0003676(nucleic acid binding)	NA	NA	NA	basonuclin 1 [Source:HGNC Symbol;Acc:HGNC:1081]	0.087371	0.133673	2.87647	2.25396	2.73805	0.0280923	-5.15368	2.56439e-18	5.44511e-17	down	yes
ENSGALG00000015874	TTK	ENSGALT00000025589	GO:0016020(membrane);GO:0005737(cytoplasm);GO:0000776(kinetochore);GO:0051304(chromosome separation);GO:1903096(protein localization to meiotic spindle midzone);GO:0046777(protein autophosphorylation);GO:0034502(protein localization to chromosome);GO:0034501(protein localization to kinetochore);GO:0033316(meiotic spindle assembly checkpoint);GO:0018108(peptidyl-tyrosine phosphorylation);GO:001810…	04110(Cell cycle)	K08866	EC:2.7.12.1	TTK protein kinase [Source:HGNC Symbol;Acc:HGNC:12401]	5.74921	5.95509	21.5055	19.0236	21.8126	0.187744	-2.41316	2.96352e-18	6.24269e-17	down	yes
ENSGALG00000025996		ENSGALT00000043356	NA	NA	NA	NA		9.60453	10.8712	31.5696	29.5643	37.1262	0.208383	-2.26269	5.28484e-18	1.09586e-16	down	yes
ENSGALG00000011966	RANGAP1	ENSGALT00000019518	GO:0048471(perinuclear region of cytoplasm);GO:0043231(intracellular membrane-bounded organelle);GO:0031965(nuclear membrane);GO:0016235(aggresome);GO:0005829(cytosol);GO:0005737(cytoplasm);GO:0005635(nuclear envelope);GO:0000776(kinetochore);GO:0046826(negative regulation of protein export from nucleus);GO:0045296(cadherin binding);GO:0005096(GTPase activator activity);GO:0043547(positive regula…	03013(RNA transport)	K14319	NA	Ran GTPase activating protein 1 [Source:HGNC Symbol;Acc:HGNC:9854]	8.76674	9.32531	29.2903	30.7014	28.1271	0.205314	-2.28409	5.29521e-18	1.0963e-16	down	yes
ENSGALG00000001664	PTPN9	ENSGALT00000002550	GO:0005737(cytoplasm);GO:0004725(protein tyrosine phosphatase activity);GO:0004721(phosphoprotein phosphatase activity);GO:0016787(hydrolase activity);GO:0016311(dephosphorylation);GO:0035335(peptidyl-tyrosine dephosphorylation);GO:0006470(protein dephosphorylation);GO:0016791(phosphatase activity)	NA	NA	NA	protein tyrosine phosphatase, non-receptor type 9 [Source:HGNC Symbol;Acc:HGNC:9661]	11.0704	10.9926	35.6301	50.7344	42.5394	0.171159	-2.5466	5.64877e-18	1.16405e-16	down	yes
ENSGALG00000005499	IL17RD	ENSGALT00000008827;ENSGALT00000061152	GO:0005794(Golgi apparatus);GO:0005654(nucleoplasm);GO:0005654(nucleoplasm)	NA	NA	NA	interleukin 17 receptor D [Source:HGNC Symbol;Acc:HGNC:17616]	9.40964	9.62153	29.9756	27.9428	28.3716	0.220549	-2.18083	6.21954e-18	1.27573e-16	down	yes
ENSGALG00000031275	TUBB6	ENSGALT00000074135;ENSGALT00000084283;ENSGALT00000083108;ENSGALT00000064218	GO:0005874(microtubule);GO:0007017(microtubule-based process);GO:0005525(GTP binding);GO:0003924(GTPase activity);GO:0005856(cytoskeleton);GO:0005737(cytoplasm);GO:0000166(nucleotide binding);GO:0007010(cytoskeleton organization);GO:0005200(structural constituent of cytoskeleton);GO:0005634(nucleus);GO:0015630(microtubule cytoskeleton);GO:0070062(extracellular exosome);GO:0070062(extracellular ex…	04145(Phagosome);04540(Gap junction);04540(Gap junction)	K07375	NA	tubulin beta 6 class V [Source:HGNC Symbol;Acc:HGNC:20776]	37.0916	39.5036	123.706	200.725	158.146	0.158721	-2.65543	6.80434e-18	1.38924e-16	down	yes
ENSGALG00000013728	PPAT	ENSGALT00000022312;ENSGALT00000063759	GO:0004044(amidophosphoribosyltransferase activity);GO:0009116(nucleoside metabolic process);GO:0051536(iron-sulfur cluster binding);GO:0009113(purine nucleobase biosynthetic process);GO:0006189('de novo' IMP biosynthetic process);GO:0006164(purine nucleotide biosynthetic process);GO:0016757(transferase activity, transferring glycosyl groups);GO:0046872(metal ion binding);GO:0016740(transferase a…	00230(Purine metabolism);00250(Alanine, aspartate and glutamate metabolism);00250(Alanine, aspartate and glutamate metabolism)	K00764	EC:2.4.2.14	phosphoribosyl pyrophosphate amidotransferase [Source:HGNC Symbol;Acc:HGNC:9238]	5.11709	5.22942	20.8383	18.6785	17.056	0.182889	-2.45096	9.14672e-18	1.85322e-16	down	yes
ENSGALG00000033339	FIGNL2	ENSGALT00000048533	NA	NA	NA	NA	fidgetin like 2 [Source:HGNC Symbol;Acc:HGNC:13287]	3.94002	5.90581	23.4603	23.8888	21.598	0.142803	-2.8079	9.58375e-18	1.93586e-16	down	yes
ENSGALG00000009895	GRIP1	ENSGALT00000064143;ENSGALT00000016088	GO:0008022(protein C-terminus binding);GO:0005886(plasma membrane);GO:0030425(dendrite);GO:0043005(neuron projection);GO:0035259(glucocorticoid receptor binding);GO:0055037(recycling endosome);GO:0008104(protein localization);GO:0045121(membrane raft);GO:0016358(dendrite development);GO:0030159(receptor signaling complex scaffold activity);GO:0030159(receptor signaling complex scaffold activity)	NA	NA	NA	glutamate receptor interacting protein 1 [Source:HGNC Symbol;Acc:HGNC:18708]	1.31787	1.30841	7.91609	6.34104	8.03547	0.117809	-3.08548	1.09501e-17	2.19848e-16	down	yes
ENSGALG00000015709	TACC3	ENSGALT00000082071;ENSGALT00000025333	GO:1902850(microtubule cytoskeleton organization involved in mitosis);GO:0060236(regulation of mitotic spindle organization);GO:0021987(cerebral cortex development);GO:0008283(cell proliferation);GO:0007091(metaphase/anaphase transition of mitotic cell cycle);GO:0015630(microtubule cytoskeleton);GO:0000226(microtubule cytoskeleton organization);GO:0005737(cytoplasm);GO:0005737(cytoplasm)	03013(RNA transport);03013(RNA transport)	K14283	NA	transforming, acidic coiled-coil containing protein 3 [Source:RefSeq peptide;Acc:NP_001004429]	14.2602	17.0262	52.525	45.0378	50.7653	0.210927	-2.24518	1.34589e-17	2.67385e-16	down	yes
ENSGALG00000037625		ENSGALT00000057924;ENSGALT00000078817	NA	NA	NA	NA		46.9965	49.5248	169.183	132.263	143.784	0.21679	-2.20563	1.41053e-17	2.79808e-16	down	yes
ENSGALG00000008049	ARL3	ENSGALT00000013061;ENSGALT00000053195	GO:0007264(small GTPase mediated signal transduction);GO:0005525(GTP binding);GO:0005622(intracellular);GO:0000166(nucleotide binding);GO:0000166(nucleotide binding)	NA	NA	NA	ADP ribosylation factor like GTPase 3 [Source:HGNC Symbol;Acc:HGNC:694]	7.01337	6.0291	25.6817	31.9147	32.5728	0.144644	-2.78942	1.99139e-17	3.8979e-16	down	yes
ENSGALG00000007178		ENSGALT00000011621	GO:0006629(lipid metabolic process);GO:0055114(oxidation-reduction process);GO:0016491(oxidoreductase activity);GO:0016021(integral component of membrane);GO:0016020(membrane)	01212(Fatty acid metabolism);00592(alpha-Linolenic acid metabolism);01040(Biosynthesis of unsaturated fatty acids);03320(PPAR signaling pathway)	K10226	EC:1.14.19.3		6.58578	5.38237	35.5942	22.7262	25.3666	0.143011	-2.8058	2.08273e-17	4.06469e-16	down	yes
ENSGALG00000003085	CDK1	ENSGALT00000004876;ENSGALT00000088351	GO:0072686(mitotic spindle);GO:0070062(extracellular exosome);GO:0030496(midbody);GO:0016020(membrane);GO:0005876(spindle microtubule);GO:0005829(cytosol);GO:0005813(centrosome);GO:0005634(nucleus);GO:0000784(nuclear chromosome, telomeric region);GO:0000307(cyclin-dependent protein kinase holoenzyme complex);GO:1900182(positive regulation of protein localization to nucleus);GO:0044772(mitotic cel…	04110(Cell cycle);04114(Oocyte meiosis);04115(p53 signaling pathway);04218(Cellular senescence);04540(Gap junction);04914(Progesterone-mediated oocyte maturation);05168(Herpes simplex infection);05168(Herpes simplex infection)	K02087	EC:2.7.11.22;EC:2.7.11.23	cyclin dependent kinase 1 [Source:HGNC Symbol;Acc:HGNC:1722]	25.2341	32.0223	116.879	86.7766	99.4907	0.188874	-2.4045	2.84342e-17	5.50876e-16	down	yes
ENSGALG00000011493	TMEM169	ENSGALT00000038136	GO:0016021(integral component of membrane);GO:0016020(membrane)	NA	NA	NA	transmembrane protein 169 [Source:HGNC Symbol;Acc:HGNC:25130]	11.0008	12.8758	43.372	44.9733	46.4779	0.177096	-2.4974	2.97895e-17	5.76292e-16	down	yes
ENSGALG00000015053	GLDC	ENSGALT00000038351	GO:0005886(plasma membrane);GO:0005739(mitochondrion);GO:0005634(nucleus);GO:0006546(glycine catabolic process);GO:0004375(glycine dehydrogenase (decarboxylating) activity);GO:0016829(lyase activity);GO:0006520(cellular amino acid metabolic process);GO:0006544(glycine metabolic process);GO:0055114(oxidation-reduction process);GO:0016491(oxidoreductase activity);GO:0003824(catalytic activity);GO:1…	01200(Carbon metabolism);00630(Glyoxylate and dicarboxylate metabolism);00260(Glycine, serine and threonine metabolism)	K00281	EC:1.4.4.2	glycine decarboxylase [Source:HGNC Symbol;Acc:HGNC:4313]	1.6524	1.34217	9.03121	6.83787	8.4099	0.12334	-3.01929	3.21844e-17	6.19911e-16	down	yes
ENSGALG00000038504	MID1	ENSGALT00000065715	GO:0046982(protein heterodimerization activity);GO:0042802(identical protein binding);GO:0008017(microtubule binding);GO:0042803(protein homodimerization activity);GO:0005874(microtubule);GO:0035372(protein localization to microtubule);GO:0005737(cytoplasm);GO:0031625(ubiquitin protein ligase binding);GO:0005881(cytoplasmic microtubule);GO:0015630(microtubule cytoskeleton);GO:0051219(phosphoprote…	04120(Ubiquitin mediated proteolysis)	K08285	EC:2.3.2.27	midline 1 (Opitz/BBB syndrome) [Source:RefSeq peptide;Acc:NP_989460]	11.6434	10.5238	33.8585	35.9145	34.9309	0.211713	-2.23982	3.51475e-17	6.74493e-16	down	yes
ENSGALG00000015132	CDH2	ENSGALT00000024417	GO:0070062(extracellular exosome);GO:0044853(plasma membrane raft);GO:0045202(synapse);GO:0042383(sarcolemma);GO:0030864(cortical actin cytoskeleton);GO:0030027(lamellipodium);GO:0016342(catenin complex);GO:0016324(apical plasma membrane);GO:0016323(basolateral plasma membrane);GO:0014704(intercalated disc);GO:0014069(postsynaptic density);GO:0005925(focal adhesion);GO:0005916(fascia adherens);GO…	04514(Cell adhesion molecules (CAMs))	K06736	NA	cadherin 2 [Source:HGNC Symbol;Acc:HGNC:1759]	24.4093	21.6622	68.9179	62.3764	74.2502	0.224144	-2.1575	3.52966e-17	6.75933e-16	down	yes
ENSGALG00000036962	KPNB1	ENSGALT00000075084	GO:0005635(nuclear envelope);GO:0019899(enzyme binding);GO:0003723(RNA binding);GO:0016020(membrane);GO:0006606(protein import into nucleus);GO:0005654(nucleoplasm);GO:0005829(cytosol);GO:0070062(extracellular exosome);GO:0019904(protein domain specific binding);GO:0090307(mitotic spindle assembly);GO:0031965(nuclear membrane);GO:0043234(protein complex);GO:0045184(establishment of protein locali…	NA	NA	NA	karyopherin subunit beta 1 [Source:HGNC Symbol;Acc:HGNC:6400]	28.9046	32.782	87.0884	89.2113	89.4463	0.232126	-2.10702	4.21398e-17	7.97771e-16	down	yes
ENSGALG00000004629	RNF216	ENSGALT00000007374	GO:0005829(cytosol);GO:0005654(nucleoplasm);GO:0005634(nucleus);GO:0070936(protein K48-linked ubiquitination);GO:0050691(regulation of defense response to virus by host);GO:0043161(proteasome-mediated ubiquitin-dependent protein catabolic process);GO:0032648(regulation of interferon-beta production)	NA	NA	NA	ring finger protein 216 [Source:HGNC Symbol;Acc:HGNC:21698]	10.7457	10.5203	33.9249	28.6322	29.7067	0.230491	-2.11722	5.64478e-17	1.05658e-15	down	yes
ENSGALG00000021520	MYMK	ENSGALT00000034784	GO:0005886(plasma membrane);GO:0045026(plasma membrane fusion);GO:0043403(skeletal muscle tissue regeneration);GO:0014905(myoblast fusion involved in skeletal muscle regeneration);GO:0007520(myoblast fusion);GO:0016021(integral component of membrane);GO:0016020(membrane)	NA	NA	NA	myomaker, myoblast fusion factor [Source:HGNC Symbol;Acc:HGNC:33778]	4.85036	5.36462	25.3547	25.1624	22.503	0.139893	-2.83761	5.71648e-17	1.0685e-15	down	yes
ENSGALG00000009567	TLL1	ENSGALT00000086496;ENSGALT00000015583;ENSGALT00000083088	GO:0004222(metalloendopeptidase activity);GO:0008237(metallopeptidase activity);GO:0006508(proteolysis);GO:0016787(hydrolase activity);GO:0008233(peptidase activity);GO:0046872(metal ion binding);GO:0008270(zinc ion binding);GO:0005509(calcium ion binding);GO:0005509(calcium ion binding)	NA	NA	NA	tolloid-like protein 1 precursor [Source:RefSeq peptide;Acc:NP_990034]	0.978032	1.14731	7.99163	6.31021	6.18963	0.103718	-3.26926	5.9586e-17	1.11063e-15	down	yes
ENSGALG00000036240		ENSGALT00000066530;ENSGALT00000057936	NA	NA	NA	NA		121.403	116.139	334.734	324.746	330	0.240067	-2.05849	6.48312e-17	1.20501e-15	down	yes
ENSGALG00000012484	RIF1	ENSGALT00000037786;ENSGALT00000070525;ENSGALT00000053511	GO:0005819(spindle);GO:2000042(negative regulation of double-strand break repair via homologous recombination);GO:0051233(spindle midzone);GO:0031965(nuclear membrane);GO:0005886(plasma membrane);GO:0016604(nuclear body);GO:0005634(nucleus);GO:0001940(male pronucleus);GO:0001939(female pronucleus);GO:0000793(condensed chromosome);GO:0000790(nuclear chromatin);GO:0000781(chromosome, telomeric regi…	NA	NA	NA	replication timing regulatory factor 1 [Source:HGNC Symbol;Acc:HGNC:23207]	9.7926	9.96702	28.8	27.1674	27.1752	0.23766	-2.07303	7.13674e-17	1.3191e-15	down	yes
ENSGALG00000008095	KIF23	ENSGALT00000013141;ENSGALT00000061959;ENSGALT00000048183;ENSGALT00000087441;ENSGALT00000051671	GO:0097149(centralspindlin complex);GO:0072686(mitotic spindle);GO:0045171(intercellular bridge);GO:0030496(midbody);GO:0005925(focal adhesion);GO:0005813(centrosome);GO:0005819(spindle);GO:0005654(nucleoplasm);GO:0005634(nucleus);GO:0051256(mitotic spindle midzone assembly);GO:0032467(positive regulation of cytokinesis);GO:0000915(actomyosin contractile ring assembly);GO:0000281(mitotic cytokine…	NA	NA	NA	kinesin family member 23 [Source:HGNC Symbol;Acc:HGNC:6392]	5.90957	6.76689	20.1464	19.3365	21.6173	0.20747	-2.26903	8.28928e-17	1.52364e-15	down	yes
ENSGALG00000013211	Sial-T2	ENSGALT00000021583	GO:0034605(cellular response to heat);GO:0008284(positive regulation of cell proliferation);GO:0097503(sialylation);GO:0008373(sialyltransferase activity);GO:0006486(protein glycosylation);GO:0005794(Golgi apparatus);GO:0016757(transferase activity, transferring glycosyl groups);GO:0016740(transferase activity);GO:0016021(integral component of membrane);GO:0016020(membrane)	00601(Glycosphingolipid biosynthesis - lacto and neolacto series);00603(Glycosphingolipid biosynthesis - globo and isoglobo series);00604(Glycosphingolipid biosynthesis - ganglio series)	K03371	EC:2.4.99.8	ST8 alpha-N-acetyl-neuraminide alpha-2,8-sialyltransferase 1 [Source:HGNC Symbol;Acc:HGNC:10869]	6.1448	4.91169	34.2547	24.2444	26.1972	0.130543	-2.9374	8.51944e-17	1.56378e-15	down	yes
ENSGALG00000030003		ENSGALT00000063807;ENSGALT00000086222	NA	NA	NA	NA		10.7951	10.6358	34.2299	31.9711	38.1005	0.205471	-2.283	1.17787e-16	2.14719e-15	down	yes
ENSGALG00000025810		ENSGALT00000084748;ENSGALT00000043056;ENSGALT00000087904	GO:0010389(regulation of G2/M transition of mitotic cell cycle);GO:0000079(regulation of cyclin-dependent protein serine/threonine kinase activity);GO:0019901(protein kinase binding);GO:0005634(nucleus);GO:0005634(nucleus)	04068(FoxO signaling pathway);04110(Cell cycle);04218(Cellular senescence);04914(Progesterone-mediated oocyte maturation);04914(Progesterone-mediated oocyte maturation)	K21771	NA		9.004	7.98726	32.2474	31.8267	30.375	0.179898	-2.47475	1.73771e-16	3.14612e-15	down	yes
ENSGALG00000042992		ENSGALT00000082299	NA	NA	NA	NA		8.12477	10.1463	39.5769	32.6562	36.6249	0.167843	-2.57481	1.7681e-16	3.19679e-15	down	yes
ENSGALG00000012915		ENSGALT00000021064	GO:0042555(MCM complex);GO:0003678(DNA helicase activity);GO:0006260(DNA replication);GO:0006270(DNA replication initiation);GO:0032508(DNA duplex unwinding);GO:0004386(helicase activity);GO:0016787(hydrolase activity);GO:0005634(nucleus);GO:0003677(DNA binding);GO:0005524(ATP binding);GO:0000166(nucleotide binding)	03030(DNA replication);04110(Cell cycle)	K02212	EC:3.6.4.12		17.8673	15.6894	52.3957	45.0652	53.2097	0.222716	-2.16673	2.23056e-16	4.00564e-15	down	yes
ENSGALG00000009305	LBR	ENSGALT00000015144	GO:0031965(nuclear membrane);GO:0016021(integral component of membrane);GO:0016020(membrane);GO:0005635(nuclear envelope);GO:0070087(chromo shadow domain binding);GO:0003723(RNA binding);GO:0016628(oxidoreductase activity, acting on the CH-CH group of donors, NAD or NADP as acceptor);GO:0055114(oxidation-reduction process)	NA	NA	NA	lamin-B receptor [Source:RefSeq peptide;Acc:NP_990673]	40.9449	43.8063	130.219	108.939	128.599	0.230454	-2.11745	2.38392e-16	4.27528e-15	down	yes
ENSGALG00000036638	ASPR	ENSGALT00000079214	GO:0004995(tachykinin receptor activity);GO:0005886(plasma membrane);GO:0007186(G-protein coupled receptor signaling pathway);GO:0007165(signal transduction);GO:0004930(G-protein coupled receptor activity);GO:0004871(signal transducer activity);GO:0016021(integral component of membrane);GO:0016020(membrane);GO:0007217(tachykinin receptor signaling pathway);GO:0048265(response to pain);GO:0070472(…	04020(Calcium signaling pathway);04080(Neuroactive ligand-receptor interaction)	K04222	NA	tachykinin receptor 1 [Source:HGNC Symbol;Acc:HGNC:11526]	1.9812	1.60369	19.227	12.7485	10.1248	0.0851513	-3.55383	2.4394e-16	4.36886e-15	down	yes
ENSGALG00000001616	CDC45	ENSGALT00000002464	GO:0031298(replication fork protection complex);GO:0031261(DNA replication preinitiation complex);GO:0005813(centrosome);GO:0005656(nuclear pre-replicative complex);GO:0005634(nucleus);GO:1902977(mitotic DNA replication preinitiation complex assembly);GO:1900087(positive regulation of G1/S transition of mitotic cell cycle);GO:0031938(regulation of chromatin silencing at telomere);GO:0006270(DNA r…	NA	NA	NA	cell division cycle 45 [Source:HGNC Symbol;Acc:HGNC:1739]	3.92368	3.67193	15.3048	14.3338	16.2938	0.165365	-2.59627	2.53474e-16	4.52131e-15	down	yes
ENSGALG00000000761	TSKU	ENSGALT00000001106	GO:0005615(extracellular space);GO:0061073(ciliary body morphogenesis);GO:0043010(camera-type eye development);GO:0030178(negative regulation of Wnt signaling pathway);GO:0021960(anterior commissure morphogenesis);GO:0021670(lateral ventricle development);GO:0021540(corpus callosum morphogenesis);GO:0010468(regulation of gene expression);GO:0007188(adenylate cyclase-modulating G-protein coupled r…	NA	NA	NA	Tsukushin [Source:UniProtKB/Swiss-Prot;Acc:Q65Z91]	14.4509	14.2444	44.4615	38.9243	42.0306	0.2288	-2.12784	2.82405e-16	5.02385e-15	down	yes
ENSGALG00000035504	ER81	ENSGALT00000046369;ENSGALT00000085673	GO:0006366(transcription from RNA polymerase II promoter);GO:0000981(RNA polymerase II transcription factor activity, sequence-specific DNA binding);GO:0030154(cell differentiation);GO:0006357(regulation of transcription from RNA polymerase II promoter);GO:0005634(nucleus);GO:0043565(sequence-specific DNA binding);GO:0003700(transcription factor activity, sequence-specific DNA binding);GO:0006355…	NA	NA	NA	ETS variant 1 [Source:HGNC Symbol;Acc:HGNC:3490]	7.87881	9.15354	24.713	25.5269	25.6528	0.224427	-2.15568	4.05165e-16	7.15639e-15	down	yes
ENSGALG00000035978	CDCA7L	ENSGALT00000074546	GO:0005634(nucleus);GO:0005829(cytosol);GO:0001650(fibrillar center);GO:0005730(nucleolus);GO:0008284(positive regulation of cell proliferation)	NA	NA	NA	cell division cycle associated 7 like [Source:HGNC Symbol;Acc:HGNC:30777]	12.1567	12.3334	37.173	35.0581	42.8887	0.212736	-2.23286	4.05516e-16	7.15639e-15	down	yes
ENSGALG00000016495	KLHL29	ENSGALT00000061766;ENSGALT00000069431	GO:0042787(protein ubiquitination involved in ubiquitin-dependent protein catabolic process);GO:0031463(Cul3-RING ubiquitin ligase complex);GO:0004842(ubiquitin-protein transferase activity);GO:0004842(ubiquitin-protein transferase activity)	NA	NA	NA	kelch like family member 29 [Source:HGNC Symbol;Acc:HGNC:29404]	5.71825	4.46917	16.2327	17.9512	17.8531	0.195773	-2.35275	4.57084e-16	8.02375e-15	down	yes
ENSGALG00000006112		ENSGALT00000063160;ENSGALT00000031281	GO:0001518(voltage-gated sodium channel complex);GO:0060078(regulation of postsynaptic membrane potential);GO:0035725(sodium ion transmembrane transport);GO:0034765(regulation of ion transmembrane transport);GO:0019228(neuronal action potential);GO:0006814(sodium ion transport);GO:0005272(sodium channel activity);GO:0005248(voltage-gated sodium channel activity);GO:0005244(voltage-gated ion chann…	04261(Adrenergic signaling in cardiomyocytes);04261(Adrenergic signaling in cardiomyocytes)	K04838	NA		2.45603	2.73672	8.99854	13.6613	10.1667	0.158187	-2.6603	4.7139e-16	8.25305e-15	down	yes
ENSGALG00000005263	SOX8	ENSGALT00000008449	GO:0044798(nuclear transcription factor complex);GO:0005737(cytoplasm);GO:0005634(nucleus);GO:0090190(positive regulation of branching involved in ureteric bud morphogenesis);GO:0090184(positive regulation of kidney development);GO:0072289(metanephric nephron tubule formation);GO:0072197(ureter morphogenesis);GO:0072034(renal vesicle induction);GO:0061138(morphogenesis of a branching epithelium);…	NA	NA	NA	SRY-box 8 [Source:HGNC Symbol;Acc:HGNC:11203]	43.2799	49.5837	131.627	140.054	127.146	0.232842	-2.10258	4.94294e-16	8.64265e-15	down	yes
ENSGALG00000004852	DNM1	ENSGALT00000007750	GO:0070062(extracellular exosome);GO:0043209(myelin sheath);GO:0030117(membrane coat);GO:0001917(photoreceptor inner segment);GO:1901998(toxin transport);GO:0051932(synaptic transmission, GABAergic);GO:0051262(protein tetramerization);GO:0016185(synaptic vesicle budding from presynaptic endocytic zone membrane);GO:0008344(adult locomotory behavior);GO:0007605(sensory perception of sound);GO:00070…	04144(Endocytosis)	K01528	EC:3.6.5.5	dynamin 1 [Source:HGNC Symbol;Acc:HGNC:2972]	16.833	15.9515	51.347	42.9485	48.4221	0.229716	-2.12207	5.62245e-16	9.79207e-15	down	yes
ENSGALG00000025862	TMEM26	ENSGALT00000043639	GO:0016021(integral component of membrane);GO:0016020(membrane)	NA	NA	NA	transmembrane protein 26 [Source:HGNC Symbol;Acc:HGNC:28550]	8.15028	7.38037	33.4914	24.0841	27.9944	0.181497	-2.46198	6.52536e-16	1.13052e-14	down	yes
ENSGALG00000003720	FANCD2	ENSGALT00000005906;ENSGALT00000064842	GO:0016604(nuclear body);GO:0005829(cytosol);GO:0005634(nucleus);GO:0005730(nucleolus);GO:0000793(condensed chromosome);GO:2000348(regulation of CD40 signaling pathway);GO:0097150(neuronal stem cell population maintenance);GO:0051090(regulation of sequence-specific DNA binding transcription factor activity);GO:0050727(regulation of inflammatory response);GO:0048854(brain morphogenesis);GO:0045589…	03460(Fanconi anemia pathway);03460(Fanconi anemia pathway)	K10891	NA	Fanconi anemia complementation group D2 [Source:HGNC Symbol;Acc:HGNC:3585]	3.69361	3.80806	13.5011	11.8875	12.1973	0.199588	-2.32491	6.56914e-16	1.13662e-14	down	yes
ENSGALG00000043511	ARHGAP32	ENSGALT00000060464	GO:0005654(nucleoplasm);GO:0005794(Golgi apparatus);GO:0001650(fibrillar center);GO:0015629(actin cytoskeleton);GO:0005938(cell cortex)	NA	NA	NA	Rho GTPase activating protein 32 [Source:HGNC Symbol;Acc:HGNC:17399]	10.9418	10.7559	28.6698	31.4622	31.7399	0.236173	-2.08208	7.54392e-16	1.3002e-14	down	yes
ENSGALG00000010748	EXO1	ENSGALT00000017486	GO:0016604(nuclear body);GO:0005654(nucleoplasm);GO:0005634(nucleus);GO:0045190(isotype switching);GO:0016446(somatic hypermutation of immunoglobulin genes);GO:0006310(DNA recombination);GO:0006298(mismatch repair);GO:0002455(humoral immune response mediated by circulating immunoglobulin);GO:0051908(double-stranded DNA 5'-3' exodeoxyribonuclease activity);GO:0048256(flap endonuclease activity);GO…	03430(Mismatch repair)	K10746	EC:3.1.-.-	exonuclease 1 [Source:HGNC Symbol;Acc:HGNC:3511]	3.93898	3.90248	19.2288	13.5505	18.0054	0.154406	-2.6952	7.63491e-16	1.31418e-14	down	yes
ENSGALG00000005451	HELLS	ENSGALT00000008749	GO:0005721(pericentric heterochromatin);GO:0005634(nucleus);GO:0000775(chromosome, centromeric region);GO:2001243(negative regulation of intrinsic apoptotic signaling pathway);GO:0046651(lymphocyte proliferation);GO:0043066(negative regulation of apoptotic process);GO:0031508(pericentric heterochromatin assembly);GO:0010216(maintenance of DNA methylation);GO:0007275(multicellular organism develop…	NA	NA	NA	helicase, lymphoid specific [Source:HGNC Symbol;Acc:HGNC:4861]	13.4347	14.1839	40.0721	43.4467	38.6734	0.226026	-2.14544	1.1149e-15	1.90423e-14	down	yes
ENSGALG00000015091	HAUS6	ENSGALT00000024342	GO:0070652(HAUS complex);GO:0016607(nuclear speck);GO:0005829(cytosol);GO:0005815(microtubule organizing center);GO:0005813(centrosome);GO:0051225(spindle assembly);GO:0007098(centrosome cycle)	NA	NA	NA	HAUS augmin like complex subunit 6 [Source:HGNC Symbol;Acc:HGNC:25948]	5.56777	6.29387	16.92	18.6024	18.6974	0.21877	-2.19252	1.23957e-15	2.10902e-14	down	yes
ENSGALG00000040938	nlgn1	ENSGALT00000087214;ENSGALT00000047878;ENSGALT00000060433;ENSGALT00000085099;ENSGALT00000072020	GO:0048488(synaptic vesicle endocytosis);GO:0098793(presynapse);GO:0060076(excitatory synapse);GO:0045202(synapse);GO:0009986(cell surface);GO:0009897(external side of plasma membrane);GO:0005887(integral component of plasma membrane);GO:2000809(positive regulation of synaptic vesicle clustering);GO:2000463(positive regulation of excitatory postsynaptic potential);GO:2000310(regulation of NMDA re…	04514(Cell adhesion molecules (CAMs));04514(Cell adhesion molecules (CAMs))	K07378	NA	neuroligin 1 [Source:HGNC Symbol;Acc:HGNC:14291]	2.28014	2.74833	9.77882	12.1171	13.5091	0.142027	-2.81576	1.24529e-15	2.11603e-14	down	yes
ENSGALG00000009913	SMARCA5	ENSGALT00000016121;ENSGALT00000038610	GO:0043596(nuclear replication fork);GO:0031213(RSF complex);GO:0031010(ISWI-type complex);GO:0016589(NURF complex);GO:0005677(chromatin silencing complex);GO:0005634(nucleus);GO:0001650(fibrillar center);GO:0000793(condensed chromosome);GO:0045893(positive regulation of transcription, DNA-templated);GO:0043044(ATP-dependent chromatin remodeling);GO:0016584(nucleosome positioning);GO:0006352(DNA-…	NA	NA	NA	SWI/SNF related, matrix associated, actin dependent regulator of chromatin, subfamily a, member 5 [Source:HGNC Symbol;Acc:HGNC:11101]	10.9424	11.2722	30.3671	30.1268	33.435	0.236504	-2.08006	1.27551e-15	2.16186e-14	down	yes
ENSGALG00000017350	RRM1	ENSGALT00000028034;ENSGALT00000087399	GO:0070062(extracellular exosome);GO:0005829(cytosol);GO:0051290(protein heterotetramerization);GO:0051259(protein oligomerization);GO:0009263(deoxyribonucleotide biosynthetic process);GO:0017076(purine nucleotide binding);GO:0004748(ribonucleoside-diphosphate reductase activity, thioredoxin disulfide as acceptor);GO:0006260(DNA replication);GO:0055114(oxidation-reduction process);GO:0016491(oxid…	00230(Purine metabolism);00240(Pyrimidine metabolism);00480(Glutathione metabolism);00480(Glutathione metabolism)	K10807	EC:1.17.4.1	ribonucleotide reductase catalytic subunit M1 [Source:HGNC Symbol;Acc:HGNC:10451]	15.3114	12.7609	45.0134	37.08	44.2312	0.222224	-2.16992	1.31332e-15	2.22309e-14	down	yes
ENSGALG00000009915	EML4	ENSGALT00000016124;ENSGALT00000053920;ENSGALT00000052372	GO:0015630(microtubule cytoskeleton);GO:0008017(microtubule binding);GO:0016020(membrane);GO:0016020(membrane)	NA	NA	NA	echinoderm microtubule associated protein like 4 [Source:HGNC Symbol;Acc:HGNC:1316]	46.2289	41.5957	122.925	115.028	118.49	0.246392	-2.02097	1.31866e-15	2.22929e-14	down	yes
ENSGALG00000006221	KIF1A	ENSGALT00000068464;ENSGALT00000010045;ENSGALT00000053794;ENSGALT00000067223	GO:0030705(cytoskeleton-dependent intracellular transport);GO:0005871(kinesin complex);GO:0007018(microtubule-based movement);GO:0016887(ATPase activity);GO:0003777(microtubule motor activity);GO:0008017(microtubule binding);GO:0003774(motor activity);GO:0005524(ATP binding);GO:0000166(nucleotide binding);GO:0042802(identical protein binding);GO:0042802(identical protein binding)	NA	NA	NA	kinesin family member 1A [Source:HGNC Symbol;Acc:HGNC:888]	0.814454	1.07828	3.80407	5.27233	5.68007	0.128265	-2.9628	1.42926e-15	2.4132e-14	down	yes
ENSGALG00000009157		ENSGALT00000014916	GO:0000910(cytokinesis);GO:0000902(cell morphogenesis);GO:0045666(positive regulation of neuron differentiation);GO:0005085(guanyl-nucleotide exchange factor activity);GO:0005096(GTPase activator activity);GO:0035023(regulation of Rho protein signal transduction);GO:0005089(Rho guanyl-nucleotide exchange factor activity);GO:0043547(positive regulation of GTPase activity);GO:0005737(cytoplasm);GO:…	NA	NA	NA		3.55036	4.05142	14.0483	13.7272	16.596	0.171321	-2.54523	1.66733e-15	2.80445e-14	down	yes
ENSGALG00000016473	OSR1	ENSGALT00000026577	GO:0001756(somitogenesis);GO:0005634(nucleus);GO:2000650(negative regulation of sodium ion transmembrane transporter activity);GO:2000543(positive regulation of gastrulation);GO:1905408(negative regulation of creatine transmembrane transporter activity);GO:0090094(metanephric cap mesenchymal cell proliferation involved in metanephros development);GO:0072498(embryonic skeletal joint development);G…	NA	NA	NA	protein odd-skipped-related 1 [Source:RefSeq peptide;Acc:NP_001162180]	14.5241	15.5841	39.5044	46.7036	49.8437	0.221299	-2.17593	1.68513e-15	2.8308e-14	down	yes
ENSGALG00000001332	RBL1	ENSGALT00000002032;ENSGALT00000084777;ENSGALT00000084131;ENSGALT00000083499	GO:0005667(transcription factor complex);GO:0005654(nucleoplasm);GO:0051726(regulation of cell cycle);GO:0005634(nucleus);GO:0043550(regulation of lipid kinase activity);GO:0010629(negative regulation of gene expression);GO:0007049(cell cycle);GO:0006357(regulation of transcription from RNA polymerase II promoter);GO:0000122(negative regulation of transcription from RNA polymerase II promoter);GO…	NA	NA	NA	RB transcriptional corepressor like 1 [Source:HGNC Symbol;Acc:HGNC:9893]	9.97131	10.3857	30.3484	27.0158	33.2086	0.224758	-2.15355	1.9021e-15	3.18721e-14	down	yes
ENSGALG00000045842		ENSGALT00000083354	NA	NA	NA	NA		4.20344	4.77254	14.9677	18.2031	18.9602	0.172181	-2.538	1.93561e-15	3.23928e-14	down	yes
ENSGALG00000026757		ENSGALT00000052890;ENSGALT00000044321	GO:0005739(mitochondrion);GO:0005737(cytoplasm);GO:2000121(regulation of removal of superoxide radicals);GO:0051000(positive regulation of nitric-oxide synthase activity);GO:0009165(nucleotide biosynthetic process);GO:0006545(glycine biosynthetic process);GO:0006729(tetrahydrobiopterin biosynthetic process);GO:0050661(NADP binding);GO:0004146(dihydrofolate reductase activity);GO:0055114(oxidation…	00790(Folate biosynthesis);00670(One carbon pool by folate);00670(One carbon pool by folate)	K00287	EC:1.5.1.3		3.27678	3.3238	15.576	16.5339	16.0008	0.137196	-2.86569	2.06791e-15	3.44765e-14	down	yes
ENSGALG00000002908	TRAIP	ENSGALT00000004580;ENSGALT00000088766;ENSGALT00000044729;ENSGALT00000086242;ENSGALT00000076163;ENSGALT00000081625;ENSGALT00000087004	GO:0046872(metal ion binding);GO:0008270(zinc ion binding);GO:0004842(ubiquitin-protein transferase activity);GO:0005057(signal transducer activity, downstream of receptor);GO:0061630(ubiquitin protein ligase activity);GO:0007165(signal transduction);GO:0010804(negative regulation of tumor necrosis factor-mediated signaling pathway);GO:0016567(protein ubiquitination);GO:0032688(negative regulatio…	NA	NA	NA	TRAF interacting protein [Source:HGNC Symbol;Acc:HGNC:30764]	1.35912	1.27008	6.34256	6.47007	6.19306	0.138337	-2.85374	2.08998e-15	3.48006e-14	down	yes
ENSGALG00000038502	CCNF	ENSGALT00000075861	GO:0019005(SCF ubiquitin ligase complex);GO:0005814(centriole);GO:0016567(protein ubiquitination);GO:0005634(nucleus);GO:0030054(cell junction);GO:0001890(placenta development);GO:0005813(centrosome);GO:0031146(SCF-dependent proteasomal ubiquitin-dependent protein catabolic process);GO:0000320(re-entry into mitotic cell cycle);GO:0010826(negative regulation of centrosome duplication)	NA	NA	NA	cyclin F [Source:HGNC Symbol;Acc:HGNC:1591]	4.97388	5.33782	19.7096	17.921	18.599	0.183386	-2.44705	2.24707e-15	3.72761e-14	down	yes
ENSGALG00000010195	PLK4	ENSGALT00000016572;ENSGALT00000051364	GO:0098536(deuterosome);GO:0005829(cytosol);GO:0005813(centrosome);GO:0005814(centriole);GO:0005730(nucleolus);GO:0098535(de novo centriole assembly involved in multi-ciliated epithelial cell differentiation);GO:0046601(positive regulation of centriole replication);GO:0007099(centriole replication);GO:0042802(identical protein binding);GO:0004674(protein serine/threonine kinase activity);GO:00064…	04068(FoxO signaling pathway);04068(FoxO signaling pathway)	K08863	EC:2.7.11.21	polo like kinase 4 [Source:HGNC Symbol;Acc:HGNC:11397]	7.88907	12.1431	35.5459	36.9463	35.6522	0.185235	-2.43257	2.2745e-15	3.76369e-14	down	yes
ENSGALG00000026981	NHSL1	ENSGALT00000046785;ENSGALT00000047580;ENSGALT00000067464;ENSGALT00000068410;ENSGALT00000044269	GO:0016020(membrane);GO:0097475(motor neuron migration);GO:0097475(motor neuron migration)	NA	NA	NA	NHS like 1 [Source:HGNC Symbol;Acc:HGNC:21021]	16.6536	14.0473	41.5114	56.7182	52.937	0.203093	-2.29979	2.2789e-15	3.76629e-14	down	yes
ENSGALG00000034516	SHISA6	ENSGALT00000060440	NA	NA	NA	NA	shisa family member 6 [Source:HGNC Symbol;Acc:HGNC:34491]	0.111551	0.539091	8.27302	6.06211	10.0082	0.0267277	-5.22552	2.55008e-15	4.19878e-14	down	yes
ENSGALG00000014023		ENSGALT00000028340;ENSGALT00000070520	GO:0000786(nucleosome);GO:0000790(nuclear chromatin);GO:0006342(chromatin silencing);GO:0046982(protein heterodimerization activity);GO:0005694(chromosome);GO:0003677(DNA binding);GO:0005634(nucleus);GO:0005634(nucleus)	04217(Necroptosis);04217(Necroptosis)	K11251	NA	Histone H2A.Z [Source:UniProtKB/Swiss-Prot;Acc:Q5ZMD6]	31.7262	34.719	92.5413	101.482	99.0326	0.226732	-2.14094	2.67218e-15	4.38349e-14	down	yes
ENSGALG00000030313	RAD51A	ENSGALT00000070280;ENSGALT00000085882	GO:0048471(perinuclear region of cytoplasm);GO:0035861(site of double-strand break);GO:0016605(PML body);GO:0005829(cytosol);GO:0005739(mitochondrion);GO:0005730(nucleolus);GO:0005737(cytoplasm);GO:0005634(nucleus);GO:0000800(lateral element);GO:0000794(condensed nuclear chromosome);GO:0000793(condensed chromosome);GO:0000790(nuclear chromatin);GO:0000785(chromatin);GO:0000784(nuclear chromosome,…	03440(Homologous recombination);03460(Fanconi anemia pathway);03460(Fanconi anemia pathway)	K04482	NA	DNA repair protein RAD51 homolog 1 [Source:UniProtKB/Swiss-Prot;Acc:P37383]	4.92541	4.66885	21.8515	16.7254	22.9767	0.155868	-2.6816	2.83542e-15	4.63981e-14	down	yes
ENSGALG00000000585		ENSGALT00000089472;ENSGALT00000087609;ENSGALT00000000816;ENSGALT00000086837;ENSGALT00000050134	GO:0005509(calcium ion binding);GO:0005509(calcium ion binding)	04371(Apelin signaling pathway);04260(Cardiac muscle contraction);04261(Adrenergic signaling in cardiomyocytes);04261(Adrenergic signaling in cardiomyocytes)	K12750	NA		1.58598	1.09721	10.3927	10.9589	10.0417	0.0854701	-3.54844	2.9054e-15	4.74264e-14	down	yes
ENSGALG00000001118	NEK6	ENSGALT00000001687;ENSGALT00000052915;ENSGALT00000073751	GO:0043231(intracellular membrane-bounded organelle);GO:0005829(cytosol);GO:0005815(microtubule organizing center);GO:0005737(cytoplasm);GO:0005654(nucleoplasm);GO:0005634(nucleus);GO:0046777(protein autophosphorylation);GO:0043123(positive regulation of I-kappaB kinase/NF-kappaB signaling);GO:0030071(regulation of mitotic metaphase/anaphase transition);GO:0018105(peptidyl-serine phosphorylation)…	NA	NA	NA	NIMA related kinase 6 [Source:HGNC Symbol;Acc:HGNC:7749]	45.9637	56.165	156.9	137.441	146.221	0.231815	-2.10896	2.95209e-15	4.81293e-14	down	yes
ENSGALG00000045784		ENSGALT00000087341	NA	NA	NA	NA		4.95752	7.11651	27.7268	27.858	26.365	0.147334	-2.76284	3.36597e-15	5.47424e-14	down	yes
ENSGALG00000036838	PXDNL	ENSGALT00000063785;ENSGALT00000047223	NA	NA	NA	NA	peroxidasin like [Source:HGNC Symbol;Acc:HGNC:26359]	44.7292	43.4628	115.608	121.956	118.522	0.247671	-2.0135	3.41971e-15	5.55483e-14	down	yes
ENSGALG00000002937	PSME3	ENSGALT00000087871;ENSGALT00000039775;ENSGALT00000075274	GO:0016020(membrane);GO:0008537(proteasome activator complex);GO:0005829(cytosol);GO:0005654(nucleoplasm);GO:0005634(nucleus);GO:2001237(negative regulation of extrinsic apoptotic signaling pathway);GO:2000045(regulation of G1/S transition of mitotic cell cycle);GO:0061136(regulation of proteasomal protein catabolic process);GO:0010950(positive regulation of endopeptidase activity);GO:0097371(MDM…	03050(Proteasome);03050(Proteasome)	K06698	NA	proteasome activator subunit 3 [Source:HGNC Symbol;Acc:HGNC:9570]	34.8803	32.2972	89.6707	88.5194	91.2216	0.249349	-2.00376	3.87784e-15	6.28362e-14	down	yes
ENSGALG00000011331	CTH	ENSGALT00000071370;ENSGALT00000018492	GO:0070062(extracellular exosome);GO:2001234(negative regulation of apoptotic signaling pathway);GO:1904831(positive regulation of aortic smooth muscle cell differentiation);GO:0071266('de novo' L-methionine biosynthetic process);GO:0070814(hydrogen sulfide biosynthetic process);GO:0051289(protein homotetramerization);GO:0051092(positive regulation of NF-kappaB transcription factor activity);GO:0…	01230(Biosynthesis of amino acids);00260(Glycine, serine and threonine metabolism);00270(Cysteine and methionine metabolism);00450(Selenocompound metabolism);00450(Selenocompound metabolism)	K01758	EC:4.4.1.1	cystathionine gamma-lyase [Source:HGNC Symbol;Acc:HGNC:2501]	10.6653	9.72532	32.1419	29.5444	32.7472	0.215925	-2.2114	3.92234e-15	6.34798e-14	down	yes
ENSGALG00000036915	SQLE	ENSGALT00000074439;ENSGALT00000086946	NA	00100(Steroid biosynthesis);00100(Steroid biosynthesis)	K00511	EC:1.14.14.17	squalene epoxidase [Source:HGNC Symbol;Acc:HGNC:11279]	1.72603	2.82676	34.8276	17.3969	14.0784	0.0686666	-3.86425	4.05969e-15	6.56226e-14	down	yes
ENSGALG00000034348	ATAD2	ENSGALT00000064875	NA	NA	NA	NA	ATPase family, AAA domain containing 2 [Source:HGNC Symbol;Acc:HGNC:30123]	6.74004	8.2279	21.8628	22.4931	23.1694	0.221664	-2.17355	4.22741e-15	6.82506e-14	down	yes
ENSGALG00000010900	SPC25	ENSGALT00000017724;ENSGALT00000089863	GO:0007059(chromosome segregation);GO:0000777(condensed chromosome kinetochore);GO:0007052(mitotic spindle organization);GO:0031262(Ndc80 complex);GO:0031262(Ndc80 complex)	NA	NA	NA	SPC25, NDC80 kinetochore complex component [Source:HGNC Symbol;Acc:HGNC:24031]	5.92901	4.84932	21.5374	22.1552	24.793	0.157381	-2.66767	4.57834e-15	7.37369e-14	down	yes
ENSGALG00000009731		ENSGALT00000044056;ENSGALT00000015838	GO:0007165(signal transduction);GO:0007165(signal transduction)	NA	NA	NA		4.12927	4.88386	15.1425	15.0631	14.0042	0.203872	-2.29426	4.64621e-15	7.47391e-14	down	yes
ENSGALG00000011962		ENSGALT00000083479;ENSGALT00000019508	NA	NA	NA	NA		0.26091	0.422657	5.26506	3.1624	4.35324	0.0534842	-4.22474	5.62144e-15	8.98821e-14	down	yes
ENSGALG00000010030		ENSGALT00000016289;ENSGALT00000069691	GO:0006338(chromatin remodeling);GO:0046872(metal ion binding);GO:0046872(metal ion binding)	NA	NA	NA		13.3447	12.7615	34.2474	35.3179	40.5815	0.237012	-2.07697	6.18717e-15	9.88086e-14	down	yes
ENSGALG00000009621	ACTB	ENSGALT00000088705;ENSGALT00000015673;ENSGALT00000085271;ENSGALT00000089197;ENSGALT00000087087;ENSGALT00000079176;ENSGALT00000085953;ENSGALT00000089159;ENSGALT00000088299;ENSGALT00000089372;ENSGALT00000084562	GO:0072562(blood microparticle);GO:0070062(extracellular exosome);GO:0043234(protein complex);GO:0043209(myelin sheath);GO:0036464(cytoplasmic ribonucleoprotein granule);GO:0035267(NuA4 histone acetyltransferase complex);GO:0030863(cortical cytoskeleton);GO:0030529(intracellular ribonucleoprotein complex);GO:0016020(membrane);GO:0005925(focal adhesion);GO:0005829(cytosol);GO:0005615(extracellular…	04145(Phagosome);04210(Apoptosis);04510(Focal adhesion);04520(Adherens junction);04530(Tight junction);04810(Regulation of actin cytoskeleton);05132(Salmonella infection);05164(Influenza A);05164(Influenza A)	K05692	NA	actin beta [Source:HGNC Symbol;Acc:HGNC:132]	656.973	756.359	1927.21	1863.66	2011.05	0.243598	-2.03743	6.43587e-15	1.02657e-13	down	yes
ENSGALG00000036892	BUB1B	ENSGALT00000055374;ENSGALT00000087715	GO:0000940(condensed chromosome outer kinetochore);GO:0034501(protein localization to kinetochore);GO:0000777(condensed chromosome kinetochore);GO:0005829(cytosol);GO:0048471(perinuclear region of cytoplasm);GO:0000776(kinetochore);GO:0005737(cytoplasm);GO:0007091(metaphase/anaphase transition of mitotic cell cycle);GO:0071459(protein localization to chromosome, centromeric region);GO:0000778(con…	04110(Cell cycle);04110(Cell cycle)	K06637	EC:2.7.11.1	BUB1 mitotic checkpoint serine/threonine kinase B [Source:HGNC Symbol;Acc:HGNC:1149]	7.82635	7.89156	32.7946	21.2141	27.5713	0.192669	-2.37581	6.53469e-15	1.04108e-13	down	yes
ENSGALG00000016042	CHAF1B	ENSGALT00000025844	GO:0043234(protein complex);GO:0033186(CAF-1 complex);GO:0005829(cytosol);GO:0005654(nucleoplasm);GO:0000790(nuclear chromatin);GO:0031497(chromatin assembly);GO:0006335(DNA replication-dependent nucleosome assembly)	NA	NA	NA	chromatin assembly factor 1 subunit B [Source:HGNC Symbol;Acc:HGNC:1911]	10.1542	9.29569	31.589	26.3375	29.8913	0.221481	-2.17475	7.62729e-15	1.21079e-13	down	yes
ENSGALG00000003484	BARD1	ENSGALT00000005512;ENSGALT00000046057	GO:0070531(BRCA1-A complex);GO:0031436(BRCA1-BARD1 complex);GO:0016607(nuclear speck);GO:0005737(cytoplasm);GO:0005634(nucleus);GO:0085020(protein K6-linked ubiquitination);GO:0046826(negative regulation of protein export from nucleus);GO:0043066(negative regulation of apoptotic process);GO:0043065(positive regulation of apoptotic process);GO:0042325(regulation of phosphorylation);GO:0046982(prot…	03440(Homologous recombination);03440(Homologous recombination)	K10683	NA	BRCA1-associated RING domain protein 1 [Source:RefSeq peptide;Acc:NP_001026417]	2.82195	2.57741	14.0796	9.9628	10.3526	0.156981	-2.67134	7.79121e-15	1.23386e-13	down	yes
ENSGALG00000004290	ANGPTL1	ENSGALT00000006824;ENSGALT00000087428	GO:0070062(extracellular exosome);GO:0005615(extracellular space);GO:0007169(transmembrane receptor protein tyrosine kinase signaling pathway);GO:0005102(receptor binding);GO:0005102(receptor binding)	NA	NA	NA	angiopoietin like 1 [Source:HGNC Symbol;Acc:HGNC:489]	18.8732	19.1734	59.0817	48.1178	56.7436	0.232072	-2.10735	9.46607e-15	1.48317e-13	down	yes
ENSGALG00000000839	WNT11	ENSGALT00000001231	GO:0005737(cytoplasm);GO:0005578(proteinaceous extracellular matrix);GO:0005576(extracellular region);GO:1903929(primary palate development);GO:0090272(negative regulation of fibroblast growth factor production);GO:0090090(negative regulation of canonical Wnt signaling pathway);GO:0090037(positive regulation of protein kinase C signaling);GO:0072201(negative regulation of mesenchymal cell prolife…	04310(Wnt signaling pathway);04150(mTOR signaling pathway);04916(Melanogenesis)	K01384	NA	Wnt family member 11 [Source:HGNC Symbol;Acc:HGNC:12776]	1.68357	2.15256	16.7098	9.14342	13.4662	0.0975634	-3.35752	1.1089e-14	1.72929e-13	down	yes
ENSGALG00000010238	NAP1L1	ENSGALT00000016642;ENSGALT00000048966	GO:0006334(nucleosome assembly);GO:0005634(nucleus);GO:0003723(RNA binding);GO:0016020(membrane);GO:0016020(membrane)	NA	NA	NA	nucleosome assembly protein 1 like 1 [Source:HGNC Symbol;Acc:HGNC:7637]	48.6777	43.3277	130.002	116.009	125.231	0.247831	-2.01257	1.32832e-14	2.06178e-13	down	yes
ENSGALG00000006631	TICRR	ENSGALT00000010711	GO:0005654(nucleoplasm);GO:0005634(nucleus);GO:0033314(mitotic DNA replication checkpoint);GO:0030174(regulation of DNA-dependent DNA replication initiation);GO:0010212(response to ionizing radiation);GO:0003682(chromatin binding);GO:0006260(DNA replication)	NA	NA	NA	TOPBP1 interacting checkpoint and replication regulator [Source:HGNC Symbol;Acc:HGNC:28704]	7.22817	7.35208	20.1846	18.764	19.9879	0.247389	-2.01515	1.43559e-14	2.22566e-13	down	yes
ENSGALG00000007493	NSDHL	ENSGALT00000088795;ENSGALT00000032336	GO:0005811(lipid droplet);GO:0005783(endoplasmic reticulum);GO:0008203(cholesterol metabolic process);GO:0007224(smoothened signaling pathway);GO:0003854(3-beta-hydroxy-delta5-steroid dehydrogenase activity);GO:0006694(steroid biosynthetic process);GO:0016616(oxidoreductase activity, acting on the CH-OH group of donors, NAD or NADP as acceptor);GO:0055114(oxidation-reduction process);GO:0016491(o…	00100(Steroid biosynthesis);00100(Steroid biosynthesis)	K07748	EC:1.1.1.170	NAD(P) dependent steroid dehydrogenase-like [Source:HGNC Symbol;Acc:HGNC:13398]	0.982368	1.17607	15.0598	7.0364	9.03127	0.0693418	-3.85013	1.44882e-14	2.24355e-13	down	yes
ENSGALG00000014801	NDC80	ENSGALT00000023897;ENSGALT00000088072;ENSGALT00000046966;ENSGALT00000088015	GO:0007059(chromosome segregation);GO:0000778(condensed nuclear chromosome kinetochore);GO:0005815(microtubule organizing center);GO:0000777(condensed chromosome kinetochore);GO:0000776(kinetochore);GO:0000775(chromosome, centromeric region);GO:0007049(cell cycle);GO:0005515(protein binding);GO:0051315(attachment of mitotic spindle microtubules to kinetochore);GO:0005694(chromosome);GO:0005200(st…	NA	NA	NA	NDC80, kinetochore complex component [Source:HGNC Symbol;Acc:HGNC:16909]	3.153	3.78425	11.2929	10.7182	11.3624	0.207867	-2.26627	1.82379e-14	2.80783e-13	down	yes
ENSGALG00000034898	ITPK1	ENSGALT00000066126;ENSGALT00000054340	GO:0032957(inositol trisphosphate metabolic process);GO:0052726(inositol-1,3,4-trisphosphate 5-kinase activity);GO:0052725(inositol-1,3,4-trisphosphate 6-kinase activity);GO:0047325(inositol tetrakisphosphate 1-kinase activity);GO:0000287(magnesium ion binding);GO:0016853(isomerase activity);GO:0046872(metal ion binding);GO:0005622(intracellular);GO:0016740(transferase activity);GO:0005524(ATP bi…	00562(Inositol phosphate metabolism);04070(Phosphatidylinositol signaling system);04070(Phosphatidylinositol signaling system)	K00913	EC:2.7.1.159;EC:2.7.1.134	Inositol-tetrakisphosphate 1-kinase [Source:UniProtKB/Swiss-Prot;Acc:Q5F480]	3.83587	3.71085	9.98471	11.9031	10.9885	0.229549	-2.12313	1.93371e-14	2.9633e-13	down	yes
ENSGALG00000017128	SKA3	ENSGALT00000078792;ENSGALT00000089023;ENSGALT00000036444	GO:0007059(chromosome segregation);GO:0000940(condensed chromosome outer kinetochore);GO:0000776(kinetochore);GO:0000278(mitotic cell cycle);GO:0005876(spindle microtubule);GO:0031110(regulation of microtubule polymerization or depolymerization);GO:0031110(regulation of microtubule polymerization or depolymerization)	NA	NA	NA	spindle and kinetochore associated complex subunit 3 [Source:HGNC Symbol;Acc:HGNC:20262]	3.78471	3.91604	14.2964	15.3753	16.6387	0.166285	-2.58827	1.94293e-14	2.97401e-13	down	yes
ENSGALG00000033541	FRMPD4	ENSGALT00000049598;ENSGALT00000050101	GO:0005546(phosphatidylinositol-4,5-bisphosphate binding);GO:0043197(dendritic spine);GO:0043234(protein complex);GO:0051835(positive regulation of synapse structural plasticity);GO:0051835(positive regulation of synapse structural plasticity)	NA	NA	NA	FERM and PDZ domain containing 4 [Source:HGNC Symbol;Acc:HGNC:29007]	2.34086	2.31999	11.5052	8.57499	8.89538	0.160855	-2.63617	2.25109e-14	3.42987e-13	down	yes
ENSGALG00000029674		ENSGALT00000078913	NA	03013(RNA transport)	K14316	NA		7.40336	7.24244	18.6648	20.2812	19.81	0.249265	-2.00425	2.50921e-14	3.81004e-13	down	yes
ENSGALG00000006997	BRINP1	ENSGALT00000011328	GO:0007050(cell cycle arrest);GO:0045786(negative regulation of cell cycle);GO:0008219(cell death);GO:0071300(cellular response to retinoic acid);GO:0045930(negative regulation of mitotic cell cycle);GO:0045666(positive regulation of neuron differentiation);GO:0007049(cell cycle);GO:0043025(neuronal cell body);GO:0030425(dendrite);GO:0005783(endoplasmic reticulum);GO:0005737(cytoplasm);GO:0001662…	NA	NA	NA	BMP/retinoic acid inducible neural specific 1 [Source:HGNC Symbol;Acc:HGNC:2687]	2.42481	0.618447	16.5287	21.2378	18.848	0.0537541	-4.21748	2.61692e-14	3.96904e-13	down	yes
ENSGALG00000009553	SMC4	ENSGALT00000059792;ENSGALT00000032997	GO:0016607(nuclear speck);GO:0005829(cytosol);GO:0000796(condensin complex);GO:0051383(kinetochore organization);GO:0045132(meiotic chromosome segregation);GO:0010032(meiotic chromosome condensation);GO:0007076(mitotic chromosome condensation);GO:0046982(protein heterodimerization activity);GO:0005694(chromosome);GO:0051276(chromosome organization);GO:0005634(nucleus);GO:0005524(ATP binding);GO:0…	NA	NA	NA	structural maintenance of chromosomes 4 [Source:HGNC Symbol;Acc:HGNC:14013]	6.9834	8.1036	22.9865	20.3585	21.6857	0.231998	-2.10781	2.62848e-14	3.98202e-13	down	yes
ENSGALG00000004515	KNTC1	ENSGALT00000007191	GO:1990423(RZZ complex);GO:0015629(actin cytoskeleton);GO:0005886(plasma membrane);GO:0005829(cytosol);GO:0005828(kinetochore microtubule);GO:0000922(spindle pole);GO:0007093(mitotic cell cycle checkpoint)	NA	NA	NA	kinetochore associated 1 [Source:HGNC Symbol;Acc:HGNC:17255]	5.99794	7.17043	20.5418	17.4347	18.462	0.233323	-2.0996	3.20522e-14	4.81183e-13	down	yes
ENSGALG00000006851		ENSGALT00000061091;ENSGALT00000011083;ENSGALT00000074641	GO:0005886(plasma membrane);GO:0007156(homophilic cell adhesion via plasma membrane adhesion molecules);GO:0007155(cell adhesion);GO:0005509(calcium ion binding);GO:0016021(integral component of membrane);GO:0016020(membrane);GO:0016020(membrane)	NA	NA	NA		3.32334	3.22793	11.4026	8.45801	12.0184	0.205505	-2.28276	3.24477e-14	4.86569e-13	down	yes
ENSGALG00000032398	ASPM	ENSGALT00000062608;ENSGALT00000081861	GO:0005737(cytoplasm);GO:0001764(neuron migration);GO:0005634(nucleus);GO:0007283(spermatogenesis);GO:0007420(brain development);GO:0097431(mitotic spindle pole);GO:0045665(negative regulation of neuron differentiation);GO:0008584(male gonad development);GO:0048589(developmental growth);GO:0090263(positive regulation of canonical Wnt signaling pathway);GO:0048477(oogenesis);GO:0005516(calmodulin …	NA	NA	NA	abnormal spindle microtubule assembly [Source:HGNC Symbol;Acc:HGNC:19048]	15.6475	17.743	45.2758	43.3136	53.8969	0.234342	-2.09331	4.0457e-14	6.03264e-13	down	yes
ENSGALG00000040833	CDCA7	ENSGALT00000085064;ENSGALT00000053170	GO:0005634(nucleus);GO:0005654(nucleoplasm);GO:0005829(cytosol);GO:0042127(regulation of cell proliferation);GO:0042127(regulation of cell proliferation)	NA	NA	NA	cell division cycle associated 7 [Source:HGNC Symbol;Acc:HGNC:14628]	13.3782	11.9249	34.6832	32.9753	39.4306	0.23628	-2.08143	5.49626e-14	8.13165e-13	down	yes
ENSGALG00000012160	KIF18A	ENSGALT00000019860	GO:1990023(mitotic spindle midzone);GO:0015630(microtubule cytoskeleton);GO:0005901(caveola);GO:0005828(kinetochore microtubule);GO:0005737(cytoplasm);GO:0005634(nucleus);GO:0001726(ruffle);GO:0000776(kinetochore);GO:0072520(seminiferous tubule development);GO:0070507(regulation of microtubule cytoskeleton organization);GO:0007140(male meiotic nuclear division);GO:0007080(mitotic metaphase plate …	NA	NA	NA	kinesin family member 18A [Source:HGNC Symbol;Acc:HGNC:29441]	2.7709	2.21257	9.92516	9.5268	9.44276	0.17247	-2.53558	5.67343e-14	8.37509e-13	down	yes
ENSGALG00000006583	LSP1	ENSGALT00000010632;ENSGALT00000039184	GO:0070062(extracellular exosome);GO:0016020(membrane);GO:0005886(plasma membrane);GO:0006952(defense response);GO:0006935(chemotaxis);GO:0004871(signal transducer activity);GO:0007165(signal transduction);GO:0007165(signal transduction)	NA	NA	NA	lymphocyte-specific protein 1 [Source:HGNC Symbol;Acc:HGNC:6707]	60.0809	54.9514	145.791	150.035	153.666	0.255917	-1.96625	6.30812e-14	9.25029e-13	down	yes
ENSGALG00000032526	B3GNT5	ENSGALT00000058942	NA	00601(Glycosphingolipid biosynthesis - lacto and neolacto series)	K03766	EC:2.4.1.206	UDP-GlcNAc:betaGal beta-1,3-N-acetylglucosaminyltransferase 5 [Source:HGNC Symbol;Acc:HGNC:15684]	3.02467	3.87317	17.3542	11.2135	12.5689	0.167681	-2.57621	6.44401e-14	9.43912e-13	down	yes
ENSGALG00000012222	RAP1GDS1	ENSGALT00000048242;ENSGALT00000019958;ENSGALT00000084151;ENSGALT00000088734;ENSGALT00000067792	GO:0070062(extracellular exosome);GO:0005829(cytosol);GO:0005783(endoplasmic reticulum);GO:0005739(mitochondrion);GO:0051561(positive regulation of mitochondrial calcium ion concentration);GO:0032471(negative regulation of endoplasmic reticulum calcium ion concentration);GO:0007264(small GTPase mediated signal transduction);GO:0043547(positive regulation of GTPase activity);GO:0043547(positive re…	NA	NA	NA	Rap1 GTPase-GDP dissociation stimulator 1 [Source:HGNC Symbol;Acc:HGNC:9859]	42.7634	42.3745	122.198	103.514	109.689	0.253839	-1.97801	7.24008e-14	1.05702e-12	down	yes
ENSGALG00000038679		ENSGALT00000077554	NA	NA	NA	NA		0.161177	0.050547	5.52602	3.36161	4.40878	0.0159234	-5.97271	7.48298e-14	1.09128e-12	down	yes
ENSGALG00000011659	ACAT2	ENSGALT00000019060	GO:0070062(extracellular exosome);GO:0005737(cytoplasm);GO:0005829(cytosol);GO:0005730(nucleolus);GO:0005634(nucleus);GO:0003985(acetyl-CoA C-acetyltransferase activity);GO:0006635(fatty acid beta-oxidation);GO:0016747(transferase activity, transferring acyl groups other than amino-acyl groups);GO:0016746(transferase activity, transferring acyl groups);GO:0005739(mitochondrion);GO:0008152(metabol…	01200(Carbon metabolism);01212(Fatty acid metabolism);00620(Pyruvate metabolism);00630(Glyoxylate and dicarboxylate metabolism);00640(Propanoate metabolism);00650(Butanoate metabolism);00071(Fatty acid degradation);00072(Synthesis and degradation of ketone bodies);00280(Valine, leucine and isoleucine degradation);00310(Lysine degradation);00380(Tryptophan metabolism);00900(Terpenoid backbone bios…	K00626	EC:2.3.1.9	acetyl-CoA acetyltransferase 2 [Source:HGNC Symbol;Acc:HGNC:94]	5.00931	7.04477	25.1875	30.9625	23.5762	0.151193	-2.72553	7.70277e-14	1.1221e-12	down	yes
ENSGALG00000014999		ENSGALT00000024188	GO:0005874(microtubule);GO:0000226(microtubule cytoskeleton organization);GO:0008017(microtubule binding);GO:0007399(nervous system development)	NA	NA	NA		13.9311	14.0516	36.6403	35.7886	40.0483	0.248786	-2.00703	7.81704e-14	1.13501e-12	down	yes
ENSGALG00000044404		ENSGALT00000085976	NA	NA	NA	NA		7.67923	6.65928	24.6812	24.5654	26.5151	0.189258	-2.40157	7.84917e-14	1.13843e-12	down	yes
ENSGALG00000031934	TES	ENSGALT00000069750;ENSGALT00000061781	GO:0005925(focal adhesion);GO:0042127(regulation of cell proliferation);GO:0008270(zinc ion binding);GO:0030054(cell junction);GO:0005737(cytoplasm);GO:0046872(metal ion binding);GO:0003723(RNA binding);GO:0045296(cadherin binding);GO:0008285(negative regulation of cell proliferation);GO:0005634(nucleus);GO:0005829(cytosol);GO:0005886(plasma membrane);GO:0043234(protein complex);GO:0043234(protei…	NA	NA	NA	Testin [Source:UniProtKB/Swiss-Prot;Acc:Q90YH9]	7.35158	9.23351	26.5867	23.3629	27.2698	0.214779	-2.21908	8.19508e-14	1.18601e-12	down	yes
ENSGALG00000014222		ENSGALT00000022998;ENSGALT00000070095	GO:0046907(intracellular transport);GO:0008536(Ran GTPase binding);GO:0005643(nuclear pore);GO:0006606(protein import into nucleus);GO:0006606(protein import into nucleus)	03013(RNA transport);03013(RNA transport)	K14295	NA		10.9146	9.72046	25.9131	28.6597	29.5571	0.245276	-2.02752	9.26164e-14	1.33599e-12	down	yes
ENSGALG00000007839	NCAM1	ENSGALT00000047809;ENSGALT00000040522;ENSGALT00000077926;ENSGALT00000077806;ENSGALT00000077661;ENSGALT00000012723	GO:0007155(cell adhesion);GO:0016021(integral component of membrane);GO:0016020(membrane);GO:0005886(plasma membrane);GO:0005829(cytosol);GO:0005829(cytosol)	04514(Cell adhesion molecules (CAMs));04514(Cell adhesion molecules (CAMs))	K06491	NA	neural cell adhesion molecule 1 [Source:HGNC Symbol;Acc:HGNC:7656]	56.5005	54.0993	135.025	159.999	155.054	0.245735	-2.02482	9.80264e-14	1.40944e-12	down	yes
ENSGALG00000017332	KLHL35	ENSGALT00000028011	GO:0031463(Cul3-RING ubiquitin ligase complex);GO:0004842(ubiquitin-protein transferase activity);GO:0016567(protein ubiquitination)	NA	NA	NA	kelch like family member 35 [Source:HGNC Symbol;Acc:HGNC:26597]	0.270769	0.116337	4.95636	2.49438	5.01383	0.0310565	-5.00896	1.1203e-13	1.60556e-12	down	yes
ENSGALG00000013726	AIRC	ENSGALT00000022308;ENSGALT00000056515	GO:0006189('de novo' IMP biosynthetic process);GO:0004639(phosphoribosylaminoimidazolesuccinocarboxamide synthase activity);GO:0004638(phosphoribosylaminoimidazole carboxylase activity);GO:0016831(carboxy-lyase activity);GO:0006164(purine nucleotide biosynthetic process);GO:0016829(lyase activity);GO:0005829(cytosol);GO:0008152(metabolic process);GO:0016874(ligase activity);GO:0003824(catalytic a…	00230(Purine metabolism);00230(Purine metabolism)	K01587	EC:4.1.1.21;EC:6.3.2.6	Multifunctional protein ADE2 Phosphoribosylaminoimidazole-succinocarboxamide synthase Phosphoribosylaminoimidazole carboxylase [Source:UniProtKB/Swiss-Prot;Acc:P38024]	12.807	16.197	47.9925	40.4724	41.065	0.223917	-2.15896	1.24672e-13	1.78097e-12	down	yes
ENSGALG00000039576	KNSTRN	ENSGALT00000085012;ENSGALT00000052077	GO:0007059(chromosome segregation);GO:0000776(kinetochore);GO:0051988(regulation of attachment of spindle microtubules to kinetochore);GO:0072686(mitotic spindle);GO:0005829(cytosol);GO:0015630(microtubule cytoskeleton);GO:0035371(microtubule plus-end);GO:0007051(spindle organization);GO:0000070(mitotic sister chromatid segregation);GO:0000070(mitotic sister chromatid segregation)	NA	NA	NA	kinetochore localized astrin/SPAG5 binding protein [Source:HGNC Symbol;Acc:HGNC:30767]	6.60672	5.15366	25.9752	22.6598	29.9469	0.149657	-2.74026	1.32825e-13	1.89336e-12	down	yes
ENSGALG00000012952		ENSGALT00000021124	GO:0031234(extrinsic component of cytoplasmic side of plasma membrane);GO:0030863(cortical cytoskeleton);GO:0030426(growth cone);GO:0045892(negative regulation of transcription, DNA-templated);GO:0005856(cytoskeleton);GO:0005737(cytoplasm);GO:0005634(nucleus);GO:0007275(multicellular organism development)	NA	NA	NA	Brain acid soluble protein 1 homolog [Source:UniProtKB/Swiss-Prot;Acc:P23614]	10.8364	8.38564	37.9607	35.2434	36.1746	0.175739	-2.5085	1.52339e-13	2.15993e-12	down	yes
ENSGALG00000005966	SEC61A1	ENSGALT00000009591	GO:0016020(membrane);GO:0005789(endoplasmic reticulum membrane);GO:0039019(pronephric nephron development);GO:0016049(cell growth);GO:0007029(endoplasmic reticulum organization);GO:0006620(posttranslational protein targeting to endoplasmic reticulum membrane);GO:0006614(SRP-dependent cotranslational protein targeting to membrane);GO:0043022(ribosome binding);GO:0015031(protein transport);GO:00068…	03060(Protein export);04141(Protein processing in endoplasmic reticulum);04145(Phagosome)	K10956	NA	Sec61 translocon alpha 1 subunit [Source:HGNC Symbol;Acc:HGNC:18276]	74.4783	79.5009	210.429	193.507	190.037	0.259236	-1.94766	1.6785e-13	2.37224e-12	down	yes
ENSGALG00000016945	CNMD	ENSGALT00000027389;ENSGALT00000089769	GO:0016525(negative regulation of angiogenesis);GO:0016021(integral component of membrane);GO:0016020(membrane);GO:0016020(membrane)	NA	NA	NA	chondromodulin [Source:HGNC Symbol;Acc:HGNC:17005]	11.9328	17.4358	48.5652	47.2968	43.5277	0.210694	-2.24678	2.12931e-13	2.98633e-12	down	yes
ENSGALG00000030025	FABP4	ENSGALT00000048096	NA	03320(PPAR signaling pathway)	K08753	NA	fatty acid binding protein 4 [Source:HGNC Symbol;Acc:HGNC:3559]	2.52812	1.69973	29.3151	16.8324	20.995	0.0629683	-3.98923	2.131e-13	2.98633e-12	down	yes
ENSGALG00000030376	DHRS3	ENSGALT00000084796;ENSGALT00000070676;ENSGALT00000067652;ENSGALT00000057161	NA	00830(Retinol metabolism);00830(Retinol metabolism)	K11146	EC:1.1.1.300	dehydrogenase/reductase 3 [Source:HGNC Symbol;Acc:HGNC:17693]	13.5748	12.7361	32.5883	36.5326	34.6748	0.253487	-1.98001	2.28909e-13	3.2011e-12	down	yes
ENSGALG00000008677	VIM	ENSGALT00000014123;ENSGALT00000090185;ENSGALT00000087655;ENSGALT00000089288;ENSGALT00000079037;ENSGALT00000083582;ENSGALT00000086205;ENSGALT00000089807;ENSGALT00000084988;ENSGALT00000084899	GO:0070062(extracellular exosome);GO:0042995(cell projection);GO:0043005(neuron projection);GO:0031252(cell leading edge);GO:0031012(extracellular matrix);GO:0005925(focal adhesion);GO:0005886(plasma membrane);GO:0005882(intermediate filament);GO:0005856(cytoskeleton);GO:0005829(cytosol);GO:0005777(peroxisome);GO:0005737(cytoplasm);GO:0070307(lens fiber cell development);GO:0060395(SMAD protein s…	NA	NA	NA	vimentin [Source:HGNC Symbol;Acc:HGNC:12692]	372.025	352.945	909.274	900.624	956.58	0.262055	-1.93206	2.33496e-13	3.25839e-12	down	yes
ENSGALG00000010674	DCTD	ENSGALT00000083514;ENSGALT00000017366;ENSGALT00000055288	GO:0005737(cytoplasm);GO:0016787(hydrolase activity);GO:0046872(metal ion binding);GO:0008270(zinc ion binding);GO:0003824(catalytic activity);GO:0004132(dCMP deaminase activity);GO:0006220(pyrimidine nucleotide metabolic process);GO:0006226(dUMP biosynthetic process);GO:0006231(dTMP biosynthetic process);GO:0042802(identical protein binding);GO:0070062(extracellular exosome);GO:0070062(extracell…	00240(Pyrimidine metabolism);00240(Pyrimidine metabolism)	K01493	EC:3.5.4.12	dCMP deaminase [Source:HGNC Symbol;Acc:HGNC:2710]	9.55251	6.87065	28.8779	26.1203	28.8308	0.195913	-2.35172	2.35367e-13	3.27761e-12	down	yes
ENSGALG00000014425	NCAPG	ENSGALT00000023302;ENSGALT00000078710	GO:0005319(lipid transporter activity);GO:0016020(membrane);GO:0005737(cytoplasm);GO:0000796(condensin complex);GO:0000793(condensed chromosome);GO:0000779(condensed chromosome, centromeric region);GO:0007076(mitotic chromosome condensation);GO:0006869(lipid transport);GO:0006869(lipid transport)	NA	NA	NA	non-SMC condensin I complex subunit G [Source:HGNC Symbol;Acc:HGNC:24304]	4.46074	5.11197	14.5351	14.5917	17.0439	0.207333	-2.26998	2.39506e-13	3.33174e-12	down	yes
ENSGALG00000000734		ENSGALT00000001050;ENSGALT00000088973	GO:0006310(DNA recombination);GO:0006281(DNA repair);GO:0006260(DNA replication);GO:0005634(nucleus);GO:0003677(DNA binding);GO:0003677(DNA binding)	03030(DNA replication);03420(Nucleotide excision repair);03430(Mismatch repair);03440(Homologous recombination);03460(Fanconi anemia pathway);03460(Fanconi anemia pathway)	K10739	NA		9.78547	10.6843	32.483	31.9453	34.3393	0.207252	-2.27054	2.5095e-13	3.47999e-12	down	yes
ENSGALG00000031866		ENSGALT00000053946;ENSGALT00000068485	NA	NA	NA	NA		6.95576	7.79491	29.3057	21.5835	26.8445	0.189759	-2.39776	2.93815e-13	4.04904e-12	down	yes
ENSGALG00000013403	MSANTD3	ENSGALT00000021859	GO:0042802(identical protein binding)	NA	NA	NA	Myb/SANT DNA binding domain containing 3 [Source:HGNC Symbol;Acc:HGNC:23370]	2.04992	2.25754	10.1781	9.59093	9.41777	0.147583	-2.76041	3.53459e-13	4.84583e-12	down	yes
ENSGALG00000009556	PRICKLE1	ENSGALT00000015558;ENSGALT00000077783	GO:0046872(metal ion binding);GO:0008270(zinc ion binding);GO:0005634(nucleus);GO:0006606(protein import into nucleus);GO:0031965(nuclear membrane);GO:0005829(cytosol);GO:0001843(neural tube closure);GO:0060976(coronary vasculature development);GO:0045892(negative regulation of transcription, DNA-templated);GO:0090090(negative regulation of canonical Wnt signaling pathway);GO:0035904(aorta develo…	04310(Wnt signaling pathway);04310(Wnt signaling pathway)	K04511	NA	prickle planar cell polarity protein 1 [Source:HGNC Symbol;Acc:HGNC:17019]	13.811	18.2779	53.642	43.5727	46.0835	0.223931	-2.15888	4.18756e-13	5.70566e-12	down	yes
ENSGALG00000009971	CDC20	ENSGALT00000016208;ENSGALT00000084381	GO:0005680(anaphase-promoting complex);GO:1904668(positive regulation of ubiquitin protein ligase activity);GO:0090307(mitotic spindle assembly);GO:0090129(positive regulation of synapse maturation);GO:0040020(regulation of meiotic nuclear division);GO:0031915(positive regulation of synaptic plasticity);GO:0031145(anaphase-promoting complex-dependent catabolic process);GO:0007064(mitotic sister c…	04120(Ubiquitin mediated proteolysis);04110(Cell cycle);04114(Oocyte meiosis);04114(Oocyte meiosis)	K03363	NA	cell division cycle 20 [Source:HGNC Symbol;Acc:HGNC:1723]	16.7362	14.3486	43.8739	42.1719	46.1859	0.235078	-2.08879	4.43789e-13	6.022e-12	down	yes
ENSGALG00000010158	KANK1	ENSGALT00000016515;ENSGALT00000067663;ENSGALT00000056024;ENSGALT00000082050;ENSGALT00000065269;ENSGALT00000052552;ENSGALT00000081020	GO:2000114(regulation of establishment of cell polarity);GO:0010977(negative regulation of neuron projection development);GO:0035024(negative regulation of Rho protein signal transduction);GO:0030336(negative regulation of cell migration);GO:0030177(positive regulation of Wnt signaling pathway);GO:0005886(plasma membrane);GO:0008013(beta-catenin binding);GO:0032587(ruffle membrane);GO:0046627(neg…	NA	NA	NA	KN motif and ankyrin repeat domains 1 [Source:HGNC Symbol;Acc:HGNC:19309]	8.56499	13.9736	38.6779	37.3521	37.4364	0.198637	-2.33179	4.74048e-13	6.40641e-12	down	yes
ENSGALG00000008414	DVL3	ENSGALT00000079617;ENSGALT00000079098;ENSGALT00000013704	GO:0005829(cytosol);GO:0000790(nuclear chromatin);GO:1903827(regulation of cellular protein localization);GO:0090179(planar cell polarity pathway involved in neural tube closure);GO:0060071(Wnt signaling pathway, planar cell polarity pathway);GO:0060070(canonical Wnt signaling pathway);GO:0050821(protein stabilization);GO:0045893(positive regulation of transcription, DNA-templated);GO:0043547(pos…	04310(Wnt signaling pathway);04330(Notch signaling pathway);04150(mTOR signaling pathway);04916(Melanogenesis);04916(Melanogenesis)	K02353	NA	dishevelled segment polarity protein 3 [Source:HGNC Symbol;Acc:HGNC:3087]	13.441	14.6114	35.6675	37.5648	37.1982	0.254028	-1.97694	4.8672e-13	6.57097e-12	down	yes
ENSGALG00000008253	TBX5	ENSGALT00000013434	GO:0043565(sequence-specific DNA binding);GO:0032526(response to retinoic acid);GO:0045893(positive regulation of transcription, DNA-templated);GO:0032993(protein-DNA complex);GO:0015629(actin cytoskeleton);GO:0097110(scaffold protein binding);GO:0008285(negative regulation of cell proliferation);GO:0005884(actin filament);GO:0030274(LIM domain binding);GO:0060174(limb bud formation);GO:0010468(r…	NA	NA	NA	T-box transcription factor TBX5 [Source:UniProtKB/Swiss-Prot;Acc:Q9PWE8]	1.09825	0.63467	7.52209	5.58118	6.16814	0.0899216	-3.47519	4.87964e-13	6.58107e-12	down	yes
ENSGALG00000033063	GINS2	ENSGALT00000060301	NA	NA	NA	NA	GINS complex subunit 2 [Source:HGNC Symbol;Acc:HGNC:24575]	5.06406	3.44286	18.8351	20.9711	17.7286	0.147857	-2.75773	5.0949e-13	6.8644e-12	down	yes
ENSGALG00000009458		ENSGALT00000015394	GO:0005509(calcium ion binding)	NA	NA	NA		1.10567	0.527771	6.73044	4.88766	5.04897	0.0980041	-3.35101	5.26726e-13	7.08225e-12	down	yes
ENSGALG00000043938		ENSGALT00000087272	NA	03030(DNA replication);03410(Base excision repair);03420(Nucleotide excision repair);03430(Mismatch repair)	K10747	EC:6.5.1.1;EC:6.5.1.6		7.09912	6.04887	28.7088	19.4292	22.1653	0.187018	-2.41875	5.3019e-13	7.12161e-12	down	yes
ENSGALG00000042875	HMGB1	ENSGALT00000075072;ENSGALT00000085332;ENSGALT00000062837	GO:0005694(chromosome);GO:0032147(activation of protein kinase activity);GO:0045087(innate immune response);GO:0006954(inflammatory response);GO:0002376(immune system process);GO:0005737(cytoplasm);GO:0005576(extracellular region);GO:0045859(regulation of protein kinase activity);GO:0005623(cell);GO:0005634(nucleus);GO:0032392(DNA geometric change);GO:0008301(DNA binding, bending);GO:0003677(DNA …	03410(Base excision repair);04140(Autophagy - animal);04217(Necroptosis);04217(Necroptosis)	K10802	NA	High mobility group protein B1 [Source:UniProtKB/Swiss-Prot;Acc:Q9YH06]	63.6154	62.7031	164.419	149.599	164.855	0.263783	-1.92258	5.37322e-13	7.21011e-12	down	yes
ENSGALG00000038461	FECH	ENSGALT00000086390;ENSGALT00000070803;ENSGALT00000048178	GO:0004325(ferrochelatase activity);GO:0046501(protoporphyrinogen IX metabolic process);GO:0046501(protoporphyrinogen IX metabolic process)	00860(Porphyrin and chlorophyll metabolism);00860(Porphyrin and chlorophyll metabolism)	K01772	EC:4.99.1.1;EC:4.99.1.9	ferrochelatase, mitochondrial precursor [Source:RefSeq peptide;Acc:NP_989527]	4.5371	5.20673	17.1783	17.756	19.2991	0.179664	-2.47662	5.41203e-13	7.24754e-12	down	yes
ENSGALG00000030836	PSD2	ENSGALT00000074360	NA	04144(Endocytosis)	K12494	NA	pleckstrin and Sec7 domain containing 2 [Source:HGNC Symbol;Acc:HGNC:19092]	2.97646	2.34314	12.34	9.44165	11.5483	0.159604	-2.64743	5.44108e-13	7.27909e-12	down	yes
ENSGALG00000041263		ENSGALT00000082498	NA	NA	NA	NA		2.77432	2.04883	13.5645	9.65979	10.2142	0.144239	-2.79346	6.43965e-13	8.58901e-12	down	yes
ENSGALG00000033834	TRIP13	ENSGALT00000084243;ENSGALT00000090074;ENSGALT00000061383	GO:0042802(identical protein binding);GO:0048477(oogenesis);GO:0007130(synaptonemal complex assembly);GO:0007283(spermatogenesis);GO:0006302(double-strand break repair);GO:0007286(spermatid development);GO:0001556(oocyte maturation);GO:0007131(reciprocal meiotic recombination);GO:0007141(male meiosis I);GO:0007144(female meiosis I);GO:0001673(male germ cell nucleus);GO:0007094(mitotic spindle ass…	NA	NA	NA	Pachytene checkpoint protein 2 homolog [Source:UniProtKB/Swiss-Prot;Acc:E1C6Q1]	4.17103	3.40126	15.1886	14.4833	15.4697	0.167745	-2.57566	6.55381e-13	8.71499e-12	down	yes
ENSGALG00000010448	LTBP1	ENSGALT00000017012;ENSGALT00000086357	GO:0043234(protein complex);GO:0031012(extracellular matrix);GO:0005615(extracellular space);GO:0005578(proteinaceous extracellular matrix);GO:0001527(microfibril);GO:0060976(coronary vasculature development);GO:0035904(aorta development);GO:0003281(ventricular septum development);GO:0050436(microfibril binding);GO:0050431(transforming growth factor beta binding);GO:0005509(calcium ion binding);G…	04350(TGF-beta signaling pathway);04350(TGF-beta signaling pathway)	K19559	NA	latent transforming growth factor beta binding protein 1 [Source:HGNC Symbol;Acc:HGNC:6714]	21.154	20.5225	63.5906	49.9902	53.2612	0.249796	-2.00118	7.02078e-13	9.30796e-12	down	yes
ENSGALG00000036497	SOX4	ENSGALT00000079692	GO:0042593(glucose homeostasis);GO:0060548(negative regulation of cell death);GO:0005634(nucleus);GO:0048485(sympathetic nervous system development);GO:0045893(positive regulation of transcription, DNA-templated);GO:0008284(positive regulation of cell proliferation);GO:0008285(negative regulation of cell proliferation);GO:0003700(transcription factor activity, sequence-specific DNA binding);GO:00…	NA	NA	NA	SRY-box 4 [Source:HGNC Symbol;Acc:HGNC:11200]	18.5933	14.7599	47.3646	48.1542	47.007	0.234015	-2.09533	7.3796e-13	9.77392e-12	down	yes
ENSGALG00000004274		ENSGALT00000006798;ENSGALT00000085749	GO:0046983(protein dimerization activity);GO:0046983(protein dimerization activity)	NA	NA	NA		2.69844	1.45151	17.3066	10.2559	15.8006	0.0957025	-3.3853	7.59465e-13	1.00487e-11	down	yes
ENSGALG00000028236	PRRX2	ENSGALT00000042831	GO:0043565(sequence-specific DNA binding);GO:0007275(multicellular organism development);GO:0006355(regulation of transcription, DNA-templated);GO:0005634(nucleus);GO:0003677(DNA binding)	NA	NA	NA	paired related homeobox 2 [Source:HGNC Symbol;Acc:HGNC:21338]	0.946921	1.38747	8.61882	5.63478	6.60701	0.111904	-3.15966	7.68441e-13	1.01574e-11	down	yes
ENSGALG00000007609		ENSGALT00000049734;ENSGALT00000033235;ENSGALT00000072770	GO:0007165(signal transduction);GO:0007165(signal transduction)	NA	NA	NA		8.77722	9.34442	22.7971	28.9642	33.6932	0.212062	-2.23744	8.27108e-13	1.09111e-11	down	yes
ENSGALG00000014688	ZYX	ENSGALT00000023672	GO:0005925(focal adhesion);GO:0005913(cell-cell adherens junction);GO:0005829(cytosol);GO:0005634(nucleus);GO:0001725(stress fiber);GO:0043149(stress fiber assembly);GO:0007229(integrin-mediated signaling pathway);GO:0007179(transforming growth factor beta receptor signaling pathway);GO:0007160(cell-matrix adhesion);GO:0003723(RNA binding);GO:0051393(alpha-actinin binding);GO:0005515(protein bind…	04510(Focal adhesion)	K06273	NA	zyxin [Source:HGNC Symbol;Acc:HGNC:13200]	44.0365	49.7371	115.203	120.846	128.044	0.257554	-1.95705	9.08727e-13	1.19521e-11	down	yes
ENSGALG00000026380	UBE2C	ENSGALT00000043007;ENSGALT00000083930	GO:0000209(protein polyubiquitination);GO:0061630(ubiquitin protein ligase activity);GO:0031625(ubiquitin protein ligase binding);GO:0005634(nucleus);GO:0005737(cytoplasm);GO:0005524(ATP binding);GO:0000166(nucleotide binding);GO:0031145(anaphase-promoting complex-dependent catabolic process);GO:0004842(ubiquitin-protein transferase activity);GO:0061631(ubiquitin conjugating enzyme activity);GO:0…	NA	NA	NA	ubiquitin conjugating enzyme E2 C [Source:HGNC Symbol;Acc:HGNC:15937]	16.6371	16.701	54.239	60.1772	64.6719	0.186155	-2.42543	9.22381e-13	1.21197e-11	down	yes
ENSGALG00000043074	NUP160	ENSGALT00000078820;ENSGALT00000088635	GO:0006406(mRNA export from nucleus);GO:0005643(nuclear pore);GO:0000776(kinetochore);GO:0031080(nuclear pore outer ring);GO:0005487(nucleocytoplasmic transporter activity);GO:0005487(nucleocytoplasmic transporter activity)	NA	NA	NA	nucleoporin 160 [Source:HGNC Symbol;Acc:HGNC:18017]	14.7015	15.47	37.8684	37.6453	38.2547	0.265201	-1.91484	9.71877e-13	1.27323e-11	down	yes
ENSGALG00000000377	HNRNPM	ENSGALT00000000510	GO:0000398(mRNA splicing, via spliceosome);GO:0003723(RNA binding);GO:0003676(nucleic acid binding);GO:0031012(extracellular matrix)	03040(Spliceosome)	K12887	NA	heterogeneous nuclear ribonucleoprotein M [Source:RefSeq peptide;Acc:NP_001026103]	30.4835	33.6179	77.8682	82.099	88.3807	0.258111	-1.95394	1.11511e-12	1.45656e-11	down	yes
ENSGALG00000010244	AKR1A1	ENSGALT00000084097;ENSGALT00000088859;ENSGALT00000053954;ENSGALT00000086151;ENSGALT00000083803;ENSGALT00000016649;ENSGALT00000084526	GO:0016491(oxidoreductase activity);GO:0055114(oxidation-reduction process);GO:0005615(extracellular space);GO:0070062(extracellular exosome);GO:0016324(apical plasma membrane);GO:0005829(cytosol);GO:0004032(alditol:NADP+ 1-oxidoreductase activity);GO:0047939(L-glucuronate reductase activity);GO:0019853(L-ascorbic acid biosynthetic process);GO:0042840(D-glucuronate catabolic process);GO:0046185(a…	00010(Glycolysis / Gluconeogenesis);00040(Pentose and glucuronate interconversions);00561(Glycerolipid metabolism);00561(Glycerolipid metabolism)	K00002	EC:1.1.1.2	aldo-keto reductase family 1 member A1 [Source:HGNC Symbol;Acc:HGNC:380]	20.073	14.1031	47.9989	61.3977	71.5623	0.188861	-2.4046	1.24868e-12	1.62943e-11	down	yes
ENSGALG00000008918	LAMP5	ENSGALT00000014499	GO:0055038(recycling endosome membrane);GO:0033116(endoplasmic reticulum-Golgi intermediate compartment membrane);GO:0032590(dendrite membrane);GO:0032584(growth cone membrane);GO:0031901(early endosome membrane);GO:0030659(cytoplasmic vesicle membrane);GO:0010008(endosome membrane);GO:0005886(plasma membrane);GO:0016021(integral component of membrane);GO:0016020(membrane)	NA	NA	NA	lysosomal associated membrane protein family member 5 [Source:HGNC Symbol;Acc:HGNC:16097]	2.04987	2.23362	11.4428	9.25379	9.43493	0.14216	-2.81441	1.29759e-12	1.68662e-11	down	yes
ENSGALG00000032326		ENSGALT00000075470	NA	NA	NA	NA		30.6895	32.9502	92.4342	83.0728	110.54	0.22248	-2.16825	1.30153e-12	1.69008e-11	down	yes
ENSGALG00000012361	NIN	ENSGALT00000020190	GO:0097539(ciliary transition fiber);GO:0097431(mitotic spindle pole);GO:0036449(microtubule minus-end);GO:0005814(centriole);GO:0005813(centrosome);GO:0005730(nucleolus);GO:0005634(nucleus);GO:0000922(spindle pole);GO:0000242(pericentriolar material);GO:0090222(centrosome-templated microtubule nucleation);GO:0034454(microtubule anchoring at centrosome);GO:0051642(centrosome localization);GO:0008…	NA	NA	NA	ninein [Source:HGNC Symbol;Acc:HGNC:14906]	1.75278	2.12723	6.43301	8.45084	10.4162	0.15336	-2.70501	1.34199e-12	1.74091e-11	down	yes
ENSGALG00000011013	PCNX2	ENSGALT00000017942;ENSGALT00000076882	GO:0016021(integral component of membrane);GO:0016020(membrane);GO:0016020(membrane)	NA	NA	NA	pecanex homolog 2 [Source:HGNC Symbol;Acc:HGNC:8736]	0.861133	0.813522	5.06221	3.39284	4.04544	0.133967	-2.90005	1.3435e-12	1.74117e-11	down	yes
ENSGALG00000017357		ENSGALT00000073781;ENSGALT00000083805;ENSGALT00000028041	GO:0043484(regulation of RNA splicing);GO:0008380(RNA splicing);GO:0006397(mRNA processing);GO:0003723(RNA binding);GO:0003676(nucleic acid binding);GO:0005634(nucleus);GO:0005634(nucleus)	03040(Spliceosome);05168(Herpes simplex infection);05168(Herpes simplex infection)	K12891	NA	Serine/arginine-rich splicing factor 2 [Source:UniProtKB/Swiss-Prot;Acc:P30352]	31.4102	47.2335	128.1	115.464	117.867	0.21759	-2.20032	1.41433e-12	1.82939e-11	down	yes
ENSGALG00000011111	PGBD5	ENSGALT00000074168;ENSGALT00000018101	GO:0016021(integral component of membrane);GO:0016020(membrane);GO:0016020(membrane)	NA	NA	NA	piggyBac transposable element derived 5 [Source:HGNC Symbol;Acc:HGNC:19405]	0.916192	0.876091	5.9044	5.69544	5.84439	0.102744	-3.28288	1.52209e-12	1.96494e-11	down	yes
ENSGALG00000004393		ENSGALT00000007003	GO:0004553(hydrolase activity, hydrolyzing O-glycosyl compounds);GO:0005975(carbohydrate metabolic process);GO:0016798(hydrolase activity, acting on glycosyl bonds);GO:0016787(hydrolase activity);GO:0008152(metabolic process);GO:0016021(integral component of membrane);GO:0016020(membrane)	NA	NA	NA		0	0.047762	1.95552	1.70748	1.21735	0.0097866	-6.67498	1.54321e-12	1.99027e-11	down	yes
ENSGALG00000004143	YWHAB	ENSGALT00000044506	GO:0019904(protein domain specific binding);GO:0005737(cytoplasm);GO:0019899(enzyme binding);GO:0042826(histone deacetylase binding);GO:0045296(cadherin binding);GO:0050815(phosphoserine residue binding);GO:0051219(phosphoprotein binding);GO:0006605(protein targeting);GO:0035308(negative regulation of protein dephosphorylation);GO:0043085(positive regulation of catalytic activity);GO:0045744(nega…	04110(Cell cycle);04114(Oocyte meiosis)	K16197	NA	tyrosine 3-monooxygenase/tryptophan 5-monooxygenase activation protein beta [Source:HGNC Symbol;Acc:HGNC:12849]	47.5841	52.5027	132.412	119.055	127.068	0.264406	-1.91917	1.54626e-12	1.99228e-11	down	yes
ENSGALG00000037423	PTPRK	ENSGALT00000074459	GO:0019901(protein kinase binding);GO:0016477(cell migration);GO:0034394(protein localization to cell surface);GO:0009986(cell surface);GO:0045892(negative regulation of transcription, DNA-templated);GO:0045786(negative regulation of cell cycle);GO:0005911(cell-cell junction);GO:0008285(negative regulation of cell proliferation);GO:0004725(protein tyrosine phosphatase activity);GO:0010839(negativ…	NA	NA	NA	protein tyrosine phosphatase, receptor type K [Source:HGNC Symbol;Acc:HGNC:9674]	5.09994	5.82717	17.2223	14.4127	15.6452	0.231114	-2.11332	1.55244e-12	1.99829e-11	down	yes
ENSGALG00000005266	BEAN1	ENSGALT00000008452	GO:0016021(integral component of membrane);GO:0016020(membrane)	NA	NA	NA	brain expressed associated with NEDD4 1 [Source:HGNC Symbol;Acc:HGNC:24160]	40.059	41.4436	111.715	96.7509	115.909	0.25126	-1.99275	1.57749e-12	2.02661e-11	down	yes
ENSGALG00000010842		ENSGALT00000017623	GO:0008270(zinc ion binding)	NA	NA	NA		26.6901	28.007	72.0872	63.6785	72.5753	0.262536	-1.92941	1.67442e-12	2.14491e-11	down	yes
ENSGALG00000011537	PDE10A	ENSGALT00000018810	GO:0043949(regulation of cAMP-mediated signaling);GO:0010738(regulation of protein kinase A signaling);GO:0030552(cAMP binding);GO:0004118(cGMP-stimulated cyclic-nucleotide phosphodiesterase activity);GO:0004114(3',5'-cyclic-nucleotide phosphodiesterase activity);GO:0008081(phosphoric diester hydrolase activity);GO:0016787(hydrolase activity);GO:0046872(metal ion binding);GO:0007165(signal transd…	00230(Purine metabolism)	K18438	EC:3.1.4.17;EC:3.1.4.35	phosphodiesterase 10A [Source:HGNC Symbol;Acc:HGNC:8772]	15.4983	15.9912	42.6664	38.0317	44.3473	0.251824	-1.98951	1.78852e-12	2.28886e-11	down	yes
ENSGALG00000009346	JPT2	ENSGALT00000015220	GO:0005886(plasma membrane);GO:0005829(cytosol)	NA	NA	NA	Jupiter microtubule associated homolog 2 [Source:HGNC Symbol;Acc:HGNC:14137]	38.3469	36.8799	97.0774	87.5921	102.074	0.262349	-1.93044	1.91658e-12	2.44802e-11	down	yes
ENSGALG00000001136		ENSGALT00000035200	GO:0006355(regulation of transcription, DNA-templated);GO:0006351(transcription, DNA-templated);GO:0046983(protein dimerization activity);GO:0005634(nucleus);GO:0003677(DNA binding)	04330(Notch signaling pathway)	K06055	NA		1.11627	2.08124	9.91711	11.678	12.1298	0.0948117	-3.39879	1.93918e-12	2.4745e-11	down	yes
ENSGALG00000008681	NSMF	ENSGALT00000014129	GO:2001222(regulation of neuron migration);GO:0048168(regulation of neuronal synaptic plasticity);GO:0071371(cellular response to gonadotropin stimulus);GO:2001224(positive regulation of neuron migration);GO:0005634(nucleus);GO:0005654(nucleoplasm);GO:0005737(cytoplasm)	NA	NA	NA	NMDA receptor synaptonuclear signaling and neuronal migration factor [Source:HGNC Symbol;Acc:HGNC:29843]	10.9112	9.59285	35.1526	46.19	35.8182	0.175008	-2.51451	1.97171e-12	2.5136e-11	down	yes
ENSGALG00000010745	HMGB2	ENSGALT00000017483;ENSGALT00000060465	GO:0048471(perinuclear region of cytoplasm);GO:0043234(protein complex);GO:0005737(cytoplasm);GO:0005730(nucleolus);GO:0005634(nucleus);GO:0005623(cell);GO:0005615(extracellular space);GO:0000793(condensed chromosome);GO:0000790(nuclear chromatin);GO:1902042(negative regulation of extrinsic apoptotic signaling pathway via death domain receptors);GO:0072091(regulation of stem cell proliferation);G…	NA	NA	NA	high mobility group box 2 [Source:HGNC Symbol;Acc:HGNC:5000]	25.7042	18.9307	68.4287	61.5519	75.4331	0.217293	-2.20229	2.091e-12	2.66057e-11	down	yes
ENSGALG00000006198	LSS	ENSGALT00000087999;ENSGALT00000068873;ENSGALT00000010002;ENSGALT00000048703	GO:0016866(intramolecular transferase activity);GO:0016853(isomerase activity);GO:0005811(lipid droplet);GO:0006694(steroid biosynthetic process);GO:0016020(membrane);GO:0031647(regulation of protein stability);GO:0000250(lanosterol synthase activity);GO:0006695(cholesterol biosynthetic process);GO:0006695(cholesterol biosynthetic process)	00100(Steroid biosynthesis);00100(Steroid biosynthesis)	K01852	EC:5.4.99.7	lanosterol synthase [Source:HGNC Symbol;Acc:HGNC:6708]	1.74281	3.22254	21.6154	13.5294	10.9839	0.107641	-3.2157	2.09639e-12	2.66487e-11	down	yes
ENSGALG00000013438	TEX10	ENSGALT00000021913;ENSGALT00000070950;ENSGALT00000086975;ENSGALT00000085769	GO:0071339(MLL1 complex);GO:0071339(MLL1 complex)	NA	NA	NA	testis expressed 10 [Source:HGNC Symbol;Acc:HGNC:25988]	14.2538	15.4598	39.5885	35.6581	37.2967	0.264019	-1.92129	2.15643e-12	2.73857e-11	down	yes
ENSGALG00000033344		ENSGALT00000051591	NA	NA	NA	NA		8.04669	11.4382	35.725	30.3666	32.8716	0.19689	-2.34454	2.22321e-12	2.82067e-11	down	yes
ENSGALG00000034168	WNT5A	ENSGALT00000070747;ENSGALT00000057121	GO:0005578(proteinaceous extracellular matrix);GO:0045165(cell fate commitment);GO:0030182(neuron differentiation);GO:0016055(Wnt signaling pathway);GO:0005109(frizzled binding);GO:0007275(multicellular organism development);GO:0005622(intracellular);GO:0005102(receptor binding);GO:0005576(extracellular region);GO:0005615(extracellular space);GO:0003700(transcription factor activity, sequence-spe…	04310(Wnt signaling pathway);04150(mTOR signaling pathway);04916(Melanogenesis);04916(Melanogenesis)	K00444	NA	Wnt family member 5A [Source:HGNC Symbol;Acc:HGNC:12784]	12.0974	12.0719	42.9187	34.5402	33.2527	0.218309	-2.19556	2.28578e-12	2.89452e-11	down	yes
ENSGALG00000040864	WDR77	ENSGALT00000053742	GO:0034709(methylosome);GO:0005634(nucleus);GO:0006357(regulation of transcription from RNA polymerase II promoter);GO:0005737(cytoplasm);GO:0005654(nucleoplasm);GO:0005829(cytosol);GO:0005794(Golgi apparatus);GO:0008285(negative regulation of cell proliferation);GO:0008284(positive regulation of cell proliferation);GO:0060770(negative regulation of epithelial cell proliferation involved in prost…	NA	NA	NA	WD repeat domain 77 [Source:HGNC Symbol;Acc:HGNC:29652]	8.53468	9.20117	25.684	25.2243	24.9206	0.233893	-2.09608	2.3329e-12	2.94856e-11	down	yes
ENSGALG00000011242	OBSL1	ENSGALT00000018337;ENSGALT00000059909	GO:0005813(centrosome);GO:0000226(microtubule cytoskeleton organization);GO:0048471(perinuclear region of cytoplasm);GO:0034067(protein localization to Golgi apparatus);GO:0007030(Golgi organization);GO:0005737(cytoplasm);GO:0005794(Golgi apparatus);GO:0007088(regulation of mitotic nuclear division);GO:0050775(positive regulation of dendrite morphogenesis);GO:1990393(3M complex);GO:0005859(muscle…	NA	NA	NA	obscurin like 1 [Source:HGNC Symbol;Acc:HGNC:29092]	8.53167	7.90996	20.386	26.6226	21.7253	0.239207	-2.06367	2.34788e-12	2.96467e-11	down	yes
ENSGALG00000009512	TFPI2	ENSGALT00000015485	GO:0004867(serine-type endopeptidase inhibitor activity);GO:0007599(hemostasis);GO:0007596(blood coagulation);GO:0030414(peptidase inhibitor activity);GO:0010466(negative regulation of peptidase activity);GO:0031012(extracellular matrix);GO:0010951(negative regulation of endopeptidase activity);GO:0005576(extracellular region)	NA	NA	NA	tissue factor pathway inhibitor 2 [Source:HGNC Symbol;Acc:HGNC:11761]	37.4811	44.7792	108.748	152.602	127.471	0.211564	-2.24084	2.47642e-12	3.10924e-11	down	yes
ENSGALG00000023904	FIBIN	ENSGALT00000040200	GO:0005783(endoplasmic reticulum);GO:0042803(protein homodimerization activity);GO:0010042(response to manganese ion);GO:0071548(response to dexamethasone);GO:1904627(response to phorbol 13-acetate 12-myristate)	NA	NA	NA	fin bud initiation factor homolog (zebrafish) [Source:HGNC Symbol;Acc:HGNC:33747]	10.8984	10.7365	41.4325	29.4403	32.5145	0.20926	-2.25663	2.6824e-12	3.35198e-11	down	yes
ENSGALG00000013135	GALNT1	ENSGALT00000021443	GO:0048471(perinuclear region of cytoplasm);GO:0005794(Golgi apparatus);GO:0016020(membrane);GO:0018243(protein O-linked glycosylation via threonine);GO:0018242(protein O-linked glycosylation via serine);GO:0006493(protein O-linked glycosylation);GO:0030145(manganese ion binding);GO:0004653(polypeptide N-acetylgalactosaminyltransferase activity);GO:0030246(carbohydrate binding);GO:0006486(protein…	00512(Mucin type O-glycan biosynthesis)	K00710	EC:2.4.1.41	polypeptide N-acetylgalactosaminyltransferase 1 [Source:HGNC Symbol;Acc:HGNC:4123]	26.4217	29.7115	81.9736	66.9805	70.8374	0.255393	-1.96921	2.75441e-12	3.43417e-11	down	yes
ENSGALG00000011683		ENSGALT00000037811;ENSGALT00000019101	GO:0019237(centromeric DNA binding);GO:0000776(kinetochore);GO:0051382(kinetochore assembly);GO:0051455(attachment of spindle microtubules to kinetochore involved in homologous chromosome segregation);GO:0000778(condensed nuclear chromosome kinetochore);GO:0051315(attachment of mitotic spindle microtubules to kinetochore);GO:0051315(attachment of mitotic spindle microtubules to kinetochore)	NA	NA	NA		4.25785	4.74184	15.3778	14.4157	13.5967	0.207413	-2.26942	3.03653e-12	3.7732e-11	down	yes
ENSGALG00000011532		ENSGALT00000083093;ENSGALT00000018803	GO:0020037(heme binding);GO:0016705(oxidoreductase activity, acting on paired donors, with incorporation or reduction of molecular oxygen);GO:0004497(monooxygenase activity);GO:0005506(iron ion binding);GO:0046872(metal ion binding);GO:0055114(oxidation-reduction process);GO:0016491(oxidoreductase activity);GO:0016491(oxidoreductase activity)	NA	NA	NA		2.42164	3.7249	15.0397	17.5	13.0645	0.13478	-2.89132	3.47241e-12	4.28673e-11	down	yes
ENSGALG00000009854	NEK2	ENSGALT00000016017;ENSGALT00000089839	GO:0043234(protein complex);GO:0030496(midbody);GO:0005813(centrosome);GO:0005654(nucleoplasm);GO:0000922(spindle pole);GO:0000794(condensed nuclear chromosome);GO:0000776(kinetochore);GO:1904355(positive regulation of telomere capping);GO:1903126(negative regulation of centriole-centriole cohesion);GO:0090307(mitotic spindle assembly);GO:0051988(regulation of attachment of spindle microtubules t…	NA	NA	NA	NIMA related kinase 2 [Source:HGNC Symbol;Acc:HGNC:7745]	3.73556	4.17187	14.6043	15.8831	16.4722	0.168388	-2.57014	3.82499e-12	4.70449e-11	down	yes
ENSGALG00000006947	BDH1	ENSGALT00000088610;ENSGALT00000011255	GO:0005743(mitochondrial inner membrane);GO:0005739(mitochondrion);GO:0005654(nucleoplasm);GO:0003858(3-hydroxybutyrate dehydrogenase activity);GO:0055114(oxidation-reduction process);GO:0016491(oxidoreductase activity);GO:0016491(oxidoreductase activity)	00650(Butanoate metabolism);00072(Synthesis and degradation of ketone bodies);00072(Synthesis and degradation of ketone bodies)	K00019	EC:1.1.1.30	3-hydroxybutyrate dehydrogenase 1 [Source:HGNC Symbol;Acc:HGNC:1027]	11.3547	4.38951	46.3523	40.9055	41.3371	0.122432	-3.02994	3.96615e-12	4.86908e-11	down	yes
ENSGALG00000032071		ENSGALT00000048759	NA	NA	NA	NA		2.83261	3.39872	15.0081	13.0617	13.8982	0.148478	-2.75168	4.09796e-12	5.01235e-11	down	yes
ENSGALG00000017347	HBE	ENSGALT00000088757;ENSGALT00000089457;ENSGALT00000084182;ENSGALT00000028029;ENSGALT00000087448;ENSGALT00000028027;ENSGALT00000088982	GO:0005833(hemoglobin complex);GO:0015671(oxygen transport);GO:0005344(oxygen carrier activity);GO:0019825(oxygen binding);GO:0020037(heme binding);GO:0006810(transport);GO:0005506(iron ion binding);GO:0046872(metal ion binding);GO:0046872(metal ion binding)	NA	NA	NA	Hemoglobin subunit epsilon [Source:UniProtKB/Swiss-Prot;Acc:P02128]	0.229984	0.178871	3.08368	5.66992	6.8145	0.0262623	-5.25086	4.12145e-12	5.03644e-11	down	yes
ENSGALG00000009944	KAT7	ENSGALT00000016166;ENSGALT00000067575	GO:0005829(cytosol);GO:0005654(nucleoplasm);GO:0005634(nucleus);GO:0000123(histone acetyltransferase complex);GO:1900182(positive regulation of protein localization to nucleus);GO:0043983(histone H4-K12 acetylation);GO:0043982(histone H4-K8 acetylation);GO:0043981(histone H4-K5 acetylation);GO:0043966(histone H3 acetylation);GO:0006260(DNA replication);GO:0016573(histone acetylation);GO:0004402(h…	NA	NA	NA	lysine acetyltransferase 7 [Source:HGNC Symbol;Acc:HGNC:17016]	9.49656	10.2485	26.5484	23.3461	26.6857	0.257835	-1.95548	4.40633e-12	5.36974e-11	down	yes
ENSGALG00000039394	PGM2	ENSGALT00000061934	GO:0070062(extracellular exosome);GO:0006006(glucose metabolic process);GO:0008973(phosphopentomutase activity);GO:0004614(phosphoglucomutase activity);GO:0071704(organic substance metabolic process);GO:0016868(intramolecular transferase activity, phosphotransferases);GO:0000287(magnesium ion binding);GO:0005975(carbohydrate metabolic process)	00010(Glycolysis / Gluconeogenesis);00030(Pentose phosphate pathway);00052(Galactose metabolism);00500(Starch and sucrose metabolism);00520(Amino sugar and nucleotide sugar metabolism);00230(Purine metabolism)	K15779	EC:5.4.2.2;EC:5.4.2.7	phosphoglucomutase 2 [Source:HGNC Symbol;Acc:HGNC:8906]	11.4785	10.1198	43.8474	31.1223	29.9776	0.205802	-2.28067	4.58521e-12	5.5826e-11	down	yes
ENSGALG00000008256		ENSGALT00000013437;ENSGALT00000090232;ENSGALT00000082169	GO:0043140(ATP-dependent 3'-5' DNA helicase activity);GO:0044237(cellular metabolic process);GO:0006310(DNA recombination);GO:0008026(ATP-dependent helicase activity);GO:0016818(hydrolase activity, acting on acid anhydrides, in phosphorus-containing anhydrides);GO:0000733(DNA strand renaturation);GO:0006281(DNA repair);GO:0000166(nucleotide binding);GO:0003676(nucleic acid binding);GO:0005622(int…	03440(Homologous recombination);03460(Fanconi anemia pathway);03460(Fanconi anemia pathway)	K10901	EC:3.6.4.12		2.31053	2.37894	9.2087	6.38286	7.56791	0.202486	-2.3041	4.64545e-12	5.65076e-11	down	yes
ENSGALG00000011046	SNX10	ENSGALT00000017994;ENSGALT00000063895;ENSGALT00000086002;ENSGALT00000054295	GO:0031313(extrinsic component of endosome membrane);GO:0005813(centrosome);GO:0005783(endoplasmic reticulum);GO:0005634(nucleus);GO:0071539(protein localization to centrosome);GO:0061512(protein localization to cilium);GO:0060271(cilium assembly);GO:0030316(osteoclast differentiation);GO:0007032(endosome organization);GO:0051117(ATPase binding);GO:0005545(1-phosphatidylinositol binding);GO:00198…	NA	NA	NA	sorting nexin 10 [Source:HGNC Symbol;Acc:HGNC:14974]	6.22052	4.88636	20.2796	14.9364	22.1232	0.193705	-2.36807	5.1606e-12	6.26591e-11	down	yes
ENSGALG00000019967	MTFR2	ENSGALT00000022584;ENSGALT00000048563;ENSGALT00000087684;ENSGALT00000088514	GO:0007005(mitochondrion organization);GO:0005739(mitochondrion);GO:0000266(mitochondrial fission);GO:0009060(aerobic respiration);GO:0009060(aerobic respiration)	NA	NA	NA	mitochondrial fission regulator 2 [Source:HGNC Symbol;Acc:HGNC:21115]	3.9517	3.5861	15.8843	12.443	14.9961	0.173989	-2.52293	5.40719e-12	6.54733e-11	down	yes
ENSGALG00000039985	CDH11	ENSGALT00000049612;ENSGALT00000056787;ENSGALT00000085780	GO:0005737(cytoplasm);GO:0070062(extracellular exosome);GO:0005886(plasma membrane);GO:0021957(corticospinal tract morphogenesis);GO:0021957(corticospinal tract morphogenesis)	NA	NA	NA	cadherin 11 [Source:HGNC Symbol;Acc:HGNC:1750]	24.0047	27.973	64.8158	64.9601	65.9094	0.265619	-1.91257	5.57775e-12	6.74771e-11	down	yes
ENSGALG00000028543	FGFR4	ENSGALT00000025332	GO:0030133(transport vesicle);GO:0005911(cell-cell junction);GO:0005887(integral component of plasma membrane);GO:0005794(Golgi apparatus);GO:0005886(plasma membrane);GO:0005783(endoplasmic reticulum);GO:2000573(positive regulation of DNA biosynthetic process);GO:0070857(regulation of bile acid biosynthetic process);GO:0070374(positive regulation of ERK1 and ERK2 cascade);GO:0046777(protein autop…	04010(MAPK signaling pathway);04144(Endocytosis);04810(Regulation of actin cytoskeleton)	K05095	EC:2.7.10.1	fibroblast growth factor receptor 4 [Source:HGNC Symbol;Acc:HGNC:3691]	23.6382	23.9368	63.6288	54.0709	59.154	0.269008	-1.89428	6.04436e-12	7.27901e-11	down	yes
ENSGALG00000010243	PRDX1	ENSGALT00000016648;ENSGALT00000062686	GO:0070062(extracellular exosome);GO:0043209(myelin sheath);GO:0031012(extracellular matrix);GO:0005739(mitochondrion);GO:0005737(cytoplasm);GO:0005634(nucleus);GO:0005615(extracellular space);GO:0042744(hydrogen peroxide catabolic process);GO:0042345(regulation of NF-kappaB import into nucleus);GO:0042267(natural killer cell mediated cytotoxicity);GO:0034101(erythrocyte homeostasis);GO:0032872(r…	04146(Peroxisome);04146(Peroxisome)	K13279	EC:1.11.1.15	peroxiredoxin 1 [Source:HGNC Symbol;Acc:HGNC:9352]	89.8513	89.6695	261.589	199.785	263.819	0.247549	-2.01421	6.07914e-12	7.30763e-11	down	yes
ENSGALG00000031524	MTBP	ENSGALT00000072701;ENSGALT00000080417	GO:0008285(negative regulation of cell proliferation);GO:0000785(chromatin);GO:0007089(traversing start control point of mitotic cell cycle);GO:0034501(protein localization to kinetochore);GO:0045839(negative regulation of mitotic nuclear division);GO:0000776(kinetochore);GO:0000776(kinetochore)	NA	NA	NA	MDM2 binding protein [Source:HGNC Symbol;Acc:HGNC:7417]	2.81673	2.6463	10.9726	8.69627	9.48478	0.187388	-2.4159	6.44212e-12	7.73696e-11	down	yes
ENSGALG00000000241	STARD4	ENSGALT00000000320	GO:0031410(cytoplasmic vesicle);GO:0070859(positive regulation of bile acid biosynthetic process);GO:0070508(cholesterol import);GO:0032367(intracellular cholesterol transport);GO:0010879(cholesterol transport involved in cholesterol storage);GO:0010873(positive regulation of cholesterol esterification);GO:0017127(cholesterol transporter activity);GO:0015485(cholesterol binding);GO:0005739(mitoch…	NA	NA	NA	StAR related lipid transfer domain containing 4 [Source:HGNC Symbol;Acc:HGNC:18058]	2.08185	2.17659	12.2698	8.3142	6.81137	0.155444	-2.68554	6.56867e-12	7.8818e-11	down	yes
ENSGALG00000031553	KIF18B	ENSGALT00000065551	GO:0000070(mitotic sister chromatid segregation);GO:0007019(microtubule depolymerization);GO:0007049(cell cycle);GO:0005871(kinesin complex);GO:0007018(microtubule-based movement);GO:0016887(ATPase activity);GO:0003777(microtubule motor activity);GO:0051301(cell division);GO:0005856(cytoskeleton);GO:0005874(microtubule);GO:0008017(microtubule binding);GO:0005737(cytoplasm);GO:0005634(nucleus);GO:…	NA	NA	NA	Kinesin-like protein KIF18B [Source:UniProtKB/Swiss-Prot;Acc:Q5ZLK6]	5.01339	4.0975	13.9229	15.2997	14.3608	0.209045	-2.25811	6.82702e-12	8.16964e-11	down	yes
ENSGALG00000036678	ETV4	ENSGALT00000067966;ENSGALT00000061696	GO:0000978(RNA polymerase II core promoter proximal region sequence-specific DNA binding);GO:0045944(positive regulation of transcription from RNA polymerase II promoter);GO:0005730(nucleolus);GO:0005730(nucleolus)	NA	NA	NA	ETS variant 4 [Source:HGNC Symbol;Acc:HGNC:3493]	0.140072	1.13944	19.6614	10.6313	13.6084	0.0291453	-5.10059	7.30944e-12	8.71551e-11	down	yes
ENSGALG00000043036	VASH1	ENSGALT00000048369	GO:0005615(extracellular space);GO:0005783(endoplasmic reticulum);GO:0005737(cytoplasm);GO:0060716(labyrinthine layer blood vessel development);GO:0045177(apical part of cell);GO:0001937(negative regulation of endothelial cell proliferation);GO:0001525(angiogenesis);GO:0009611(response to wounding);GO:0016525(negative regulation of angiogenesis);GO:0060674(placenta blood vessel development);GO:00…	NA	NA	NA	vasohibin 1 [Source:HGNC Symbol;Acc:HGNC:19964]	29.1625	28.922	81.7451	103.654	97.536	0.205293	-2.28425	7.95719e-12	9.46236e-11	down	yes
ENSGALG00000015151	B4GALT6	ENSGALT00000024447	GO:0005975(carbohydrate metabolic process);GO:0016757(transferase activity, transferring glycosyl groups);GO:0016021(integral component of membrane);GO:0016020(membrane);GO:0008378(galactosyltransferase activity);GO:0001572(lactosylceramide biosynthetic process)	00600(Sphingolipid metabolism)	K07553	EC:2.4.1.274	beta-1,4-galactosyltransferase 6 [Source:HGNC Symbol;Acc:HGNC:929]	1.56794	1.37227	5.8469	4.98145	5.90219	0.175739	-2.50849	1.02665e-11	1.2154e-10	down	yes
[truncated: 1,644 more rows]

## Sheet: D1VSE12
Table S2. List of identified DEGs from pairwise comparisons ( D1 VS E12 )
gene_id	gene_name	transcript_id	GO	KEGG	KO_ENTRY	EC	Description	FPKM.D1_1	FPKM.D1_2	FPKM.D1_3	FPKM.E12_1	FPKM.E12_2	FPKM.E12_3	fc	log2(fc)	pval	qval	regulation	significant
[truncated: 4,582 more rows]

## Sheet: D1VSE17
Table S2. List of identified DEGs from pairwise comparisons (D1 VS E17 )
gene_id	gene_name	transcript_id	GO	KEGG	KO_ENTRY	EC	Description	FPKM.D1_1	FPKM.D1_2	FPKM.D1_3	FPKM.E17_1	FPKM.E17_2	fc	log2(fc)	pval	qval	regulation	significant
[truncated: 2,429 more rows]

## Sheet: D14VSD1
Table S2. List of identified DEGs from pairwise comparisons (D14 VS D1 )
[truncated: 1,840 more rows]

## Sheet: D14VSE12
Table S2. List of identified DEGs from pairwise comparisons (D14 VS E12 )
[truncated: 4,395 more rows]

## Sheet: D14VSE17
Table S2. List of identified DEGs from pairwise comparisons (D14 VS E17)
[truncated: 4,100 more rows]

[truncated: 9 more sheets: D56VSD1, D56VSE12, D56VSD14, D56VSE17, D98VSD1, D98VSD14, D98VSD56, D98VSE12, D98VSE17]
