# Supplementary material for: Dynamic Transcriptomic Analysis of Breast Muscle Development From the Embryonic to Post-hatching Periods in Chickens
Source: Front Genet. 2020 Jan 10;10:1308. doi: 10.3389/fgene.2019.01308 (PMC6967404; doi:10.3389/fgene.2019.01308)
Supplement: Supplementary file 3 [file Table_3.xlsx]

## Sheet: profile8
Table S3. The genes of the significant profiles by the STEM analysis(profile 8)
gene_id	gene_name	transcript_id	GO	KEGG	KO_ENTRY	EC	Description	FPKM.E12_1	FPKM.E12_2	FPKM.E12_3	FPKM.E17_1	FPKM.E17_3	FPKM.D1_1	FPKM.D1_2	FPKM.D1_3	FPKM.D14_1	FPKM.D14_2	FPKM.D14_3	FPKM.D56_1	FPKM.D56_2	FPKM.D56_3	FPKM.D98_1	FPKM.D98_2	FPKM.D98_3
ENSGALG00000043035	SHISA2	ENSGALT00000047717	GO:0005783(endoplasmic reticulum);GO:0030178(negative regulation of Wnt signaling pathway);GO:0040037(negative regulation of fibroblast growth factor receptor signaling pathway)	NA	NA	NA	shisa family member 2 [Source:HGNC Symbol;Acc:HGNC:20366]	176.625	261.14	222.682	292.702	257.425	12.1867	16.4118	19.7819	2.9469	2.57818	3.32231	1.4083	1.75337	2.32454	1.37747	1.62217	1.5774
ENSGALG00000033671	FREM2	ENSGALT00000078166	GO:0070062(extracellular exosome);GO:0048839(inner ear development);GO:0007507(heart development);GO:0005604(basement membrane);GO:0002009(morphogenesis of an epithelium)	NA	NA	NA	FRAS1 related extracellular matrix protein 2 [Source:HGNC Symbol;Acc:HGNC:25396]	428.918	430.569	367.824	112.1	107.69	23.3303	14.6829	20.0436	10.3551	8.43148	6.30745	3.11513	2.18197	2.05374	2.68396	3.46389	5.55898
ENSGALG00000003595	SARM1	ENSGALT00000005687	GO:0045202(synapse);GO:0031315(extrinsic component of mitochondrial outer membrane);GO:0030425(dendrite);GO:0015630(microtubule cytoskeleton);GO:0005874(microtubule);GO:0005739(mitochondrion);GO:0005737(cytoplasm);GO:1901214(regulation of neuron death);GO:0048814(regulation of dendrite morphogenesis);GO:0042981(regulation of apoptotic process);GO:0009749(response to glucose);GO:0007165(signal tra…	NA	NA	NA	sterile alpha and TIR motif containing 1 [Source:HGNC Symbol;Acc:HGNC:17074]	30.558	26.937	31.7006	6.10484	5.34607	0.570738	0.648729	0.741566	0.115271	0.112116	0.049343	0.197499	0.234631	0.272761	0.159195	0.049307	0.066073
ENSGALG00000011319	ADGRL3	ENSGALT00000018468;ENSGALT00000057115;ENSGALT00000049317;ENSGALT00000077690;ENSGALT00000080549;ENSGALT00000062560;ENSGALT00000081609	GO:0007166(cell surface receptor signaling pathway);GO:0004888(transmembrane signaling receptor activity);GO:0030246(carbohydrate binding);GO:0007186(G-protein coupled receptor signaling pathway);GO:0007165(signal transduction);GO:0004930(G-protein coupled receptor activity);GO:0004871(signal transducer activity);GO:0016021(integral component of membrane);GO:0016020(membrane);GO:0005911(cell-cell…	NA	NA	NA	adhesion G protein-coupled receptor L3 [Source:HGNC Symbol;Acc:HGNC:20974]	148.931	143.785	146.595	76.3991	69.0794	15.9501	14.8733	15.5132	4.04752	3.06041	4.15693	2.20191	3.00433	3.18334	1.03407	2.21827	1.91875
ENSGALG00000004491	DMGDH	ENSGALT00000007151	GO:0005759(mitochondrial matrix);GO:0005739(mitochondrion);GO:0047865(dimethylglycine dehydrogenase activity);GO:0003723(RNA binding);GO:0016491(oxidoreductase activity);GO:0055114(oxidation-reduction process);GO:0042426(choline catabolic process)	NA	NA	NA	dimethylglycine dehydrogenase [Source:HGNC Symbol;Acc:HGNC:24475]	102.163	129.131	140.705	99.2195	143.027	18.7489	12.2921	21.8268	5.93578	3.83642	2.26982	1.0878	0.84223	0.531813	0.266742	0.372311	0.333035
ENSGALG00000011270	KERA	ENSGALT00000085113;ENSGALT00000018391;ENSGALT00000084147;ENSGALT00000076001;ENSGALT00000061247;ENSGALT00000089143	GO:0061303(cornea development in camera-type eye);GO:0005578(proteinaceous extracellular matrix);GO:0005615(extracellular space);GO:0005576(extracellular region);GO:0005576(extracellular region)	NA	NA	NA	keratocan [Source:HGNC Symbol;Acc:HGNC:6309]	90.437	83.4161	76.2024	10.1074	9.31573	1.45068	0.821105	1.67641	0.340441	0.191454	0.260542	0.0889355	0	0	0.0326171	0.0613469	0.0320926
ENSGALG00000003473	SFRP1	ENSGALT00000005499;ENSGALT00000089330;ENSGALT00000081645	GO:0070062(extracellular exosome);GO:0031012(extracellular matrix);GO:0009986(cell surface);GO:0005829(cytosol);GO:0005622(intracellular);GO:0005615(extracellular space);GO:0005578(proteinaceous extracellular matrix);GO:2001238(positive regulation of extrinsic apoptotic signaling pathway);GO:2000271(positive regulation of fibroblast apoptotic process);GO:2000270(negative regulation of fibroblast …	04310(Wnt signaling pathway);04310(Wnt signaling pathway)	K02166	NA	secreted frizzled related protein 1 [Source:HGNC Symbol;Acc:HGNC:10776]	65.692	59.2499	60.4015	14.4714	14.6206	4.62877	3.06445	4.89837	1.39272	0.840935	1.66777	0.84642	1.33638	1.0352	0.527343	0.949462	0.803661
ENSGALG00000045426		ENSGALT00000083510	NA	NA	NA	NA		113.328	93.2833	107.5	40.8621	54.299	5.37408	4.5314	3.32282	1.67116	1.36058	2.12036	2.18562	1.66978	1.39929	0.41082	1.22462	0.681669
ENSGALG00000036466	MYO10	ENSGALT00000065466	GO:0008360(regulation of cell shape);GO:0051489(regulation of filopodium assembly);GO:0005829(cytosol);GO:0005886(plasma membrane);GO:0030507(spectrin binding);GO:0005730(nucleolus);GO:0043005(neuron projection);GO:0043025(neuronal cell body);GO:0030175(filopodium);GO:0022409(positive regulation of cell-cell adhesion)	NA	NA	NA	myosin X [Source:HGNC Symbol;Acc:HGNC:7593]	51.0501	53.2869	51.0254	73.8736	64.2977	9.76324	9.35085	15.2885	4.28761	3.98986	3.23493	2.81177	2.98536	2.62709	1.94064	2.19378	1.74539
ENSGALG00000004155	MYOM3	ENSGALT00000006605	GO:0031430(M band);GO:0042803(protein homodimerization activity)	NA	NA	NA	myomesin 3 [Source:HGNC Symbol;Acc:HGNC:26679]	121.381	122.076	118.685	87.5425	72.228	6.89069	8.60466	11.8021	0.873657	0.263781	0.583377	0.949084	0.583704	1.26726	0.38431	0.353217	0.141307
ENSGALG00000040493	PTN	ENSGALT00000049974	GO:0019901(protein kinase binding);GO:0008284(positive regulation of cell proliferation);GO:0008201(heparin binding);GO:0005615(extracellular space);GO:0008083(growth factor activity);GO:0030282(bone mineralization);GO:0043234(protein complex);GO:0005783(endoplasmic reticulum);GO:0007612(learning);GO:0001503(ossification);GO:0035374(chondroitin sulfate binding)	NA	NA	NA	pleiotrophin [Source:HGNC Symbol;Acc:HGNC:9630]	71.7274	49.1307	47.0271	7.391	8.3554	5.02459	3.55215	8.25638	0.586467	0.593763	0.396368	0.253504	0.321694	0.173685	0.343944	0.586595	0.22266
ENSGALG00000016391		ENSGALT00000075424;ENSGALT00000061072;ENSGALT00000026441	GO:0009966(regulation of signal transduction);GO:0005737(cytoplasm);GO:0016020(membrane);GO:0016020(membrane)	NA	NA	NA		37.434	43.5345	42.3807	34.833	36.1064	6.17054	7.03644	7.77931	2.4226	2.22782	2.67361	1.26246	0.937374	0.961587	1.57186	0.881836	1.1209
ENSGALG00000008444		ENSGALT00000040237;ENSGALT00000067484	GO:0005874(microtubule);GO:0007017(microtubule-based process);GO:0003924(GTPase activity);GO:0005525(GTP binding);GO:0005856(cytoskeleton);GO:0005737(cytoplasm);GO:0000166(nucleotide binding);GO:0007010(cytoskeleton organization);GO:0005200(structural constituent of cytoskeleton);GO:0005200(structural constituent of cytoskeleton)	04145(Phagosome);04210(Apoptosis);04530(Tight junction);04540(Gap junction);04540(Gap junction)	K07374	NA		346.169	341.902	364.407	121.933	120.135	13.8184	21.8448	11.8684	10.6166	4.42493	4.60095	3.09198	3.47112	4.89248	2.07169	3.67777	2.66537
ENSGALG00000038022	COL22A1	ENSGALT00000069481	NA	NA	NA	NA	collagen, type XXII, alpha 1 precursor [Source:RefSeq peptide;Acc:NP_001132911]	8.55615	9.60898	7.59591	7.05038	8.43487	1.03825	1.20953	1.73716	0.347905	0.402323	0.16778	0.009636	0	0	0.013223	0.024987	0.008914
ENSGALG00000014582	CADM1	ENSGALT00000084236;ENSGALT00000057839;ENSGALT00000063063;ENSGALT00000066785;ENSGALT00000023514	GO:0070062(extracellular exosome);GO:0005886(plasma membrane);GO:0051606(detection of stimulus);GO:0050715(positive regulation of cytokine secretion);GO:0045954(positive regulation of natural killer cell mediated cytotoxicity);GO:0042271(susceptibility to natural killer cell mediated cytotoxicity);GO:0008037(cell recognition);GO:0034987(immunoglobulin receptor binding);GO:0005102(receptor binding…	04514(Cell adhesion molecules (CAMs));04514(Cell adhesion molecules (CAMs))	K06781	NA	cell adhesion molecule 1 [Source:HGNC Symbol;Acc:HGNC:5951]	136.072	204.337	186.51	189.967	159.868	43.1127	57.0027	51.0057	5.12477	4.27306	4.98952	4.90937	3.17093	6.20168	3.36766	5.59793	3.15827
ENSGALG00000004794	H2AFY2	ENSGALT00000088636;ENSGALT00000007651;ENSGALT00000085998	GO:0000790(nuclear chromatin);GO:0000786(nucleosome);GO:0016569(covalent chromatin modification);GO:0006334(nucleosome assembly);GO:0006342(chromatin silencing);GO:0046982(protein heterodimerization activity);GO:0031490(chromatin DNA binding);GO:0005694(chromosome);GO:0003677(DNA binding);GO:0005634(nucleus);GO:0016021(integral component of membrane);GO:0016020(membrane);GO:0035098(ESC/E(Z) compl…	04217(Necroptosis);04217(Necroptosis)	K11251	NA	H2A histone family member Y2 [Source:HGNC Symbol;Acc:HGNC:14453]	47.9048	51.8349	52.8671	11.9668	12.3203	4.11028	3.84403	4.09353	1.36295	0.515249	0.843838	0.315277	0.570312	0.576812	0.411495	0.605816	0.464583
ENSGALG00000002855	SARDH	ENSGALT00000004499;ENSGALT00000049522;ENSGALT00000073692	GO:0005739(mitochondrion);GO:0008480(sarcosine dehydrogenase activity);GO:1901053(sarcosine catabolic process);GO:0005759(mitochondrial matrix);GO:0016491(oxidoreductase activity);GO:0055114(oxidation-reduction process);GO:0055114(oxidation-reduction process)	00260(Glycine, serine and threonine metabolism);00260(Glycine, serine and threonine metabolism)	K00314	EC:1.5.8.3	sarcosine dehydrogenase [Source:HGNC Symbol;Acc:HGNC:10536]	171.481	156.817	164.525	26.4749	43.8354	8.20278	7.04937	7.81006	8.33268	6.77178	8.71009	2.30783	3.82382	3.91177	1.12211	1.28428	2.53456
ENSGALG00000031895	SDK2	ENSGALT00000086658;ENSGALT00000058734;ENSGALT00000066540;ENSGALT00000054680	GO:0060219(camera-type eye photoreceptor cell differentiation);GO:0010842(retina layer formation);GO:0007416(synapse assembly);GO:0007156(homophilic cell adhesion via plasma membrane adhesion molecules);GO:0045202(synapse);GO:0045202(synapse)	NA	NA	NA	sidekick cell adhesion molecule 2 [Source:HGNC Symbol;Acc:HGNC:19308]	72.9807	76.3605	76.5034	38.311	43.079	3.25817	4.54282	2.89515	0.847966	0.575576	1.00568	0.672897	0.42007	1.47921	0.193021	0.278082	0.429479
ENSGALG00000004508	EYA2	ENSGALT00000007180;ENSGALT00000050872	GO:2001240(negative regulation of extrinsic apoptotic signaling pathway in absence of ligand);GO:0045739(positive regulation of DNA repair);GO:0016576(histone dephosphorylation);GO:0014706(striated muscle tissue development);GO:0004725(protein tyrosine phosphatase activity);GO:0048856(anatomical structure development);GO:0004721(phosphoprotein phosphatase activity);GO:0030154(cell differentiation…	NA	NA	NA	Gallus gallus eyes absent homolog 2 (Drosophila) (EYA2), mRNA. [Source:RefSeq mRNA;Acc:NM_204915]	36.2344	36.9967	35.2136	7.80998	10.6693	1.48915	1.67263	1.90828	1.0031	0.365266	0.814258	0.758686	0.434405	0.521731	0.181829	0.23024	0.133014
ENSGALG00000005180	COL11A1	ENSGALT00000083237;ENSGALT00000063775;ENSGALT00000008321	GO:0007605(sensory perception of sound);GO:0007601(visual perception);GO:0042472(inner ear morphogenesis);GO:0005578(proteinaceous extracellular matrix);GO:0005615(extracellular space);GO:0055010(ventricular cardiac muscle tissue morphogenesis);GO:0002063(chondrocyte development);GO:0030199(collagen fibril organization);GO:0003007(heart morphogenesis);GO:0005581(collagen trimer);GO:0006029(proteo…	NA	NA	NA	collagen type XI alpha 1 chain [Source:HGNC Symbol;Acc:HGNC:2186]	44.3682	46.8414	34.4326	43.2177	45.1537	37.1539	42.4848	34.8814	1.75035	1.65123	1.6873	0.644335	0.344112	0.429027	0.179084	0.69205	0.394319
ENSGALG00000031593		ENSGALT00000049155	GO:0003785(actin monomer binding);GO:0007015(actin filament organization)	NA	NA	NA		831.9	989.183	1072.38	206.716	170.64	24.6167	26.8304	27.4646	32.3039	26.2709	28.4624	24.4213	23.1968	58.4373	17.9031	20.6835	12.242
ENSGALG00000016945	CNMD	ENSGALT00000027389;ENSGALT00000089769	GO:0016525(negative regulation of angiogenesis);GO:0016021(integral component of membrane);GO:0016020(membrane);GO:0016020(membrane)	NA	NA	NA	chondromodulin [Source:HGNC Symbol;Acc:HGNC:17005]	48.5652	47.2968	43.5277	11.9328	17.4358	4.25715	4.3055	5.91384	1.03707	0.686529	0.541901	0.801174	0.782841	0.415558	0.767019	0.68118	0.407329
ENSGALG00000026981	NHSL1	ENSGALT00000067464;ENSGALT00000044269;ENSGALT00000047580;ENSGALT00000046785;ENSGALT00000068410	GO:0016020(membrane);GO:0097475(motor neuron migration);GO:0097475(motor neuron migration)	NA	NA	NA	NHS like 1 [Source:HGNC Symbol;Acc:HGNC:21021]	41.5114	56.7182	52.937	16.6536	14.0473	3.75726	3.87581	4.35678	0.94167	0.839534	1.1628	1.07935	1.13496	1.72091	0.500473	0.496153	1.19588
ENSGALG00000039985	CDH11	ENSGALT00000056787;ENSGALT00000085780;ENSGALT00000049612	GO:0005737(cytoplasm);GO:0070062(extracellular exosome);GO:0005886(plasma membrane);GO:0021957(corticospinal tract morphogenesis);GO:0021957(corticospinal tract morphogenesis)	NA	NA	NA	cadherin 11 [Source:HGNC Symbol;Acc:HGNC:1750]	64.8158	64.9601	65.9094	24.0047	27.973	10.6498	14.0592	13.2731	2.74524	3.30082	1.93327	3.67138	2.08309	3.09496	2.2081	2.54521	2.39673
ENSGALG00000007993	DCX	ENSGALT00000012977;ENSGALT00000089383;ENSGALT00000085718	GO:0035556(intracellular signal transduction);GO:0001764(neuron migration);GO:0007420(brain development);GO:0021766(hippocampus development);GO:0021819(layer formation in cerebral cortex);GO:0021860(pyramidal neuron development);GO:0021952(central nervous system projection neuron axonogenesis);GO:0048675(axon extension);GO:0048813(dendrite morphogenesis);GO:0005737(cytoplasm);GO:0043005(neuron pr…	NA	NA	NA	doublecortin isoform 2 [Source:RefSeq peptide;Acc:NP_001292603]	130.117	85.883	102.323	40.8793	44.471	3.90188	4.41043	4.451	1.42385	1.22862	1.95608	2.18699	1.59829	1.68006	0.386581	1.5504	1.34819
ENSGALG00000013239		ENSGALT00000032638;ENSGALT00000087089	GO:0019215(intermediate filament binding);GO:0005882(intermediate filament);GO:0005198(structural molecule activity);GO:0005198(structural molecule activity)	NA	NA	NA	nestin [Source:RefSeq peptide;Acc:NP_990364]	577.696	613.384	606.885	290.775	294.239	7.67788	10.2276	5.55396	1.55652	1.0884	1.17398	1.14624	0.887561	3.49756	1.24539	1.26158	4.0007
ENSGALG00000009301	CHRNA1	ENSGALT00000065398;ENSGALT00000015138;ENSGALT00000055980	GO:0005886(plasma membrane);GO:0009986(cell surface);GO:0016020(membrane);GO:0007528(neuromuscular junction development);GO:0031594(neuromuscular junction);GO:0007274(neuromuscular synaptic transmission);GO:0015464(acetylcholine receptor activity);GO:0022848(acetylcholine-gated cation-selective channel activity);GO:0042166(acetylcholine binding);GO:0003009(skeletal muscle contraction);GO:0019228(…	04080(Neuroactive ligand-receptor interaction);04080(Neuroactive ligand-receptor interaction)	K04803	NA	cholinergic receptor nicotinic alpha 1 subunit [Source:HGNC Symbol;Acc:HGNC:1955]	73.8735	62.2585	68.45	13.7532	16.5359	8.51097	5.53708	11.3746	5.39639	3.8313	5.15175	2.40231	2.07356	2.43284	1.12711	1.40132	1.58819
ENSGALG00000006851		ENSGALT00000061091;ENSGALT00000011083;ENSGALT00000074641	GO:0005886(plasma membrane);GO:0007156(homophilic cell adhesion via plasma membrane adhesion molecules);GO:0007155(cell adhesion);GO:0005509(calcium ion binding);GO:0016021(integral component of membrane);GO:0016020(membrane);GO:0016020(membrane)	NA	NA	NA		11.4026	8.45801	12.0184	3.32334	3.22793	1.08678	1.08616	0.818399	0.32097	0.187429	0.320909	0.296027	0.222631	0.342996	0.223708	0.207452	0.14616
ENSGALG00000016473	OSR1	ENSGALT00000026577	GO:0001756(somitogenesis);GO:0005634(nucleus);GO:2000650(negative regulation of sodium ion transmembrane transporter activity);GO:2000543(positive regulation of gastrulation);GO:1905408(negative regulation of creatine transmembrane transporter activity);GO:0090094(metanephric cap mesenchymal cell proliferation involved in metanephros development);GO:0072498(embryonic skeletal joint development);G…	NA	NA	NA	protein odd-skipped-related 1 [Source:RefSeq peptide;Acc:NP_001162180]	39.5044	46.7036	49.8437	14.5241	15.5841	3.48231	4.3217	3.53784	1.01562	0.629884	0.866732	1.32084	0.660392	1.77157	0.733508	1.02053	0.563069
ENSGALG00000035594		ENSGALT00000054723;ENSGALT00000066937	NA	04260(Cardiac muscle contraction);04261(Adrenergic signaling in cardiomyocytes);04261(Adrenergic signaling in cardiomyocytes)	K17751	NA		15.8515	24.8739	19.017	5.74751	7.80494	1.32027	0.902801	1.28242	0.0204935	0.0790425	0.0353135	0.0206999	0.0284048	0	0.00846563	0.0253776	0
ENSGALG00000010988	MPP6	ENSGALT00000017898	GO:0070062(extracellular exosome);GO:0005886(plasma membrane)	NA	NA	NA	membrane palmitoylated protein 6 [Source:HGNC Symbol;Acc:HGNC:18167]	101.645	171.266	135.62	78.0082	95.7705	13.8813	25.8946	19.6546	5.06151	2.95913	4.47863	3.31367	3.85979	3.00638	2.67486	3.8608	4.75365
ENSGALG00000043584	COL19A1	ENSGALT00000061315	GO:0007519(skeletal muscle tissue development);GO:0030198(extracellular matrix organization)	NA	NA	NA	collagen type XIX alpha 1 chain [Source:HGNC Symbol;Acc:HGNC:2196]	12.0738	13.9312	14.8664	17.65	16.1488	10.4421	9.85167	9.15163	1.22453	0.762209	0.884534	0.652548	0.520388	0.606083	0.507962	0.498143	0.360426
ENSGALG00000034892		ENSGALT00000080717	NA	NA	NA	NA		163.529	154.495	167.965	77.257	66.5842	14.3441	9.79786	12.1769	5.95429	2.49435	4.82218	1.48227	1.10402	0.748913	1.9421	2.80501	1.06852
ENSGALG00000015511	ROBO1	ENSGALT00000025009;ENSGALT00000072564;ENSGALT00000054880	GO:0035385(Roundabout signaling pathway);GO:0007507(heart development);GO:0007411(axon guidance);GO:0005623(cell);GO:0016021(integral component of membrane);GO:0016020(membrane);GO:0030275(LRR domain binding);GO:0042802(identical protein binding);GO:0002042(cell migration involved in sprouting angiogenesis);GO:0006919(activation of cysteine-type endopeptidase activity involved in apoptotic proces…	NA	NA	NA	roundabout guidance receptor 1 [Source:HGNC Symbol;Acc:HGNC:10249]	37.2551	36.3349	34.7996	17.8142	21.3265	6.9665	7.5338	6.10085	2.28359	2.07801	2.87776	1.6998	2.07624	1.92176	1.61344	1.95323	2.3597
ENSGALG00000012821		ENSGALT00000045583;ENSGALT00000086318;ENSGALT00000080430;ENSGALT00000089175;ENSGALT00000020914;ENSGALT00000050510;ENSGALT00000068299	GO:0005874(microtubule);GO:0007017(microtubule-based process);GO:0005525(GTP binding);GO:0003924(GTPase activity);GO:0005856(cytoskeleton);GO:0005737(cytoplasm);GO:0000166(nucleotide binding);GO:0007010(cytoskeleton organization);GO:0005200(structural constituent of cytoskeleton);GO:0005509(calcium ion binding);GO:0031115(negative regulation of microtubule polymerization);GO:0031115(negative regu…	04145(Phagosome);04540(Gap junction);04540(Gap junction)	K07375	NA	Tubulin beta-2 chain [Source:UniProtKB/Swiss-Prot;Acc:P32882]	183.795	179.672	185.08	92.7108	99.0828	16.0428	9.67673	10.4555	6.85431	5.51534	7.06747	5.98941	5.69752	10.3904	4.70747	7.50807	9.00685
ENSGALG00000017229	FAT3	ENSGALT00000056674;ENSGALT00000067902;ENSGALT00000027850;ENSGALT00000027846;ENSGALT00000046975	GO:0005886(plasma membrane);GO:0007156(homophilic cell adhesion via plasma membrane adhesion molecules);GO:0007155(cell adhesion);GO:0005509(calcium ion binding);GO:0016021(integral component of membrane);GO:0016020(membrane);GO:0016020(membrane)	NA	NA	NA	FAT atypical cadherin 3 [Source:HGNC Symbol;Acc:HGNC:23112]	23.5287	28.3389	25.9487	13.2846	12.1212	2.77007	1.47836	4.26174	1.01279	0.535605	0.738247	0.506752	0.658436	0.303321	0.188036	0.202086	0.243783
ENSGALG00000003409	SOGA1	ENSGALT00000005391	GO:0070062(extracellular exosome);GO:0010506(regulation of autophagy);GO:0005615(extracellular space);GO:0008286(insulin receptor signaling pathway)	NA	NA	NA	suppressor of glucose, autophagy associated 1 [Source:HGNC Symbol;Acc:HGNC:16111]	101.471	111.584	111.271	101.026	96.3321	19.3386	25.0858	23.1453	7.30182	6.95859	9.03309	6.48023	6.42308	8.65581	5.46738	8.44614	7.97149
ENSGALG00000007839	NCAM1	ENSGALT00000040522;ENSGALT00000077806;ENSGALT00000077926;ENSGALT00000047809;ENSGALT00000077661;ENSGALT00000012723	GO:0007155(cell adhesion);GO:0016021(integral component of membrane);GO:0016020(membrane);GO:0005886(plasma membrane);GO:0005829(cytosol);GO:0005829(cytosol)	04514(Cell adhesion molecules (CAMs));04514(Cell adhesion molecules (CAMs))	K06491	NA	neural cell adhesion molecule 1 [Source:HGNC Symbol;Acc:HGNC:7656]	135.025	159.999	155.054	56.5005	54.0993	49.4683	32.1447	31.8321	10.3984	5.92854	7.32856	5.27505	4.13006	4.39233	3.34942	5.33772	4.28851
ENSGALG00000023581		ENSGALT00000039218	GO:0008217(regulation of blood pressure);GO:0001604(urotensin II receptor activity);GO:0007200(phospholipase C-activating G-protein coupled receptor signaling pathway);GO:0007218(neuropeptide signaling pathway);GO:0005887(integral component of plasma membrane);GO:0007186(G-protein coupled receptor signaling pathway);GO:0007165(signal transduction);GO:0004930(G-protein coupled receptor activity);G…	NA	NA	NA		56.7379	62.4443	59.8827	25.6921	26.26	11.8331	14.5902	12.102	3.1861	2.89868	1.98496	1.82558	1.31034	1.82009	2.18838	2.17055	2.39592
ENSGALG00000016584	EGFL6	ENSGALT00000026770;ENSGALT00000075997;ENSGALT00000076480	GO:0005604(basement membrane);GO:0005578(proteinaceous extracellular matrix);GO:0030198(extracellular matrix organization);GO:0010811(positive regulation of cell-substrate adhesion);GO:0005509(calcium ion binding);GO:0016020(membrane);GO:0016020(membrane)	NA	NA	NA	EGF like domain multiple 6 [Source:HGNC Symbol;Acc:HGNC:3235]	223.303	231.121	201.65	57.4078	70.2984	12.8241	13.8151	20.0287	6.64892	3.87659	4.89208	4.13386	3.70517	1.74296	1.98649	4.75889	2.57905
ENSGALG00000007045	ADGRA1	ENSGALT00000072356;ENSGALT00000011413	GO:0007166(cell surface receptor signaling pathway);GO:0004888(transmembrane signaling receptor activity);GO:0007186(G-protein coupled receptor signaling pathway);GO:0007165(signal transduction);GO:0004930(G-protein coupled receptor activity);GO:0004871(signal transducer activity);GO:0016021(integral component of membrane);GO:0016020(membrane);GO:0016020(membrane)	NA	NA	NA	adhesion G protein-coupled receptor A1 [Source:HGNC Symbol;Acc:HGNC:13838]	45.3407	50.2078	46.194	22.679	23.8703	14.8903	10.5941	11.8664	3.88092	3.49746	3.96536	2.82487	3.02591	1.93301	2.18906	2.3895	1.65604
ENSGALG00000043290	GNMT	ENSGALT00000054194	GO:0051289(protein homotetramerization);GO:0005829(cytosol);GO:0005977(glycogen metabolic process);GO:0016594(glycine binding);GO:0017174(glycine N-methyltransferase activity);GO:0006111(regulation of gluconeogenesis);GO:0006555(methionine metabolic process);GO:0006730(one-carbon metabolic process);GO:0046500(S-adenosylmethionine metabolic process)	00260(Glycine, serine and threonine metabolism)	K00552	EC:2.1.1.20	glycine N-methyltransferase [Source:HGNC Symbol;Acc:HGNC:4415]	168.671	198.841	164.215	82.7513	98.604	17.3186	31.77	29.1037	8.03539	7.36209	9.36223	3.34863	4.59765	5.39373	3.42354	3.21709	6.04241
ENSGALG00000005763	VILL	ENSGALT00000009258	GO:0007010(cytoskeleton organization);GO:0051015(actin filament binding);GO:0003779(actin binding)	NA	NA	NA	villin like [Source:HGNC Symbol;Acc:HGNC:30906]	18.9753	17.3647	18.6128	1.7425	1.58032	0.674267	1.28774	0.606095	0.327528	0.502739	0.286751	0.251839	0.31003	0.224736	0.090401	0.017113	0.054946
ENSGALG00000000302		ENSGALT00000070446;ENSGALT00000059944;ENSGALT00000084315;ENSGALT00000031453;ENSGALT00000000401	GO:0005861(troponin complex);GO:0006937(regulation of muscle contraction);GO:0006937(regulation of muscle contraction)	04260(Cardiac muscle contraction);04261(Adrenergic signaling in cardiomyocytes);04261(Adrenergic signaling in cardiomyocytes)	K12045	NA	troponin T, cardiac muscle isoforms [Source:RefSeq peptide;Acc:NP_990780]	124.059	131.859	146.971	80.1442	75.9841	0.912918	0.893054	2.06008	0.60112	0.128929	0.554375	0.346513	0.229137	1.19648	0.230134	0.253649	0.131604
ENSGALG00000006560	SEMA3A	ENSGALT00000010591;ENSGALT00000042634	GO:0044297(cell body);GO:0005615(extracellular space);GO:2001224(positive regulation of neuron migration);GO:2000020(positive regulation of male gonad development);GO:1990535(neuron projection maintenance);GO:2000009(negative regulation of protein localization to cell surface);GO:1903375(facioacoustic ganglion development);GO:1903045(neural crest cell migration involved in sympathetic nervous sys…	NA	NA	NA	semaphorin 3A [Source:HGNC Symbol;Acc:HGNC:10723]	61.725	51.3801	64.0437	22.5086	24.757	10.2099	9.85477	11.9106	4.88973	3.48135	4.09568	4.53021	3.06302	2.72047	1.90501	2.44778	1.85811
ENSGALG00000009293	CHN1	ENSGALT00000015119;ENSGALT00000042646	GO:0050770(regulation of axonogenesis);GO:0043087(regulation of GTPase activity);GO:0008045(motor neuron axon guidance);GO:0046875(ephrin receptor binding);GO:0051056(regulation of small GTPase mediated signal transduction);GO:0005096(GTPase activator activity);GO:0043547(positive regulation of GTPase activity);GO:0005622(intracellular);GO:0046872(metal ion binding);GO:0035556(intracellular signa…	NA	NA	NA	chimerin 1 [Source:HGNC Symbol;Acc:HGNC:1943]	93.7632	75.3829	77.7749	37.1774	36.6006	20.4319	12.7953	16.0248	4.69617	3.56478	2.25735	3.31033	2.52884	3.56694	2.20559	2.94633	2.01279
ENSGALG00000010053	PTPRF	ENSGALT00000066531;ENSGALT00000077706;ENSGALT00000069062;ENSGALT00000068137;ENSGALT00000057707;ENSGALT00000016337	GO:0016477(cell migration);GO:0035335(peptidyl-tyrosine dephosphorylation);GO:0004725(protein tyrosine phosphatase activity);GO:0070062(extracellular exosome);GO:0032403(protein complex binding);GO:0010975(regulation of neuron projection development);GO:0004721(phosphoprotein phosphatase activity);GO:0035373(chondroitin sulfate proteoglycan binding);GO:0031102(neuron projection regeneration);GO:0…	04514(Cell adhesion molecules (CAMs));04520(Adherens junction);04910(Insulin signaling pathway);04910(Insulin signaling pathway)	K05695	EC:3.1.3.48	protein tyrosine phosphatase, receptor type F [Source:HGNC Symbol;Acc:HGNC:9670]	30.8484	28.4455	27.2186	12.7761	12.682	4.03627	4.98176	5.08225	1.31628	0.777532	1.15578	0.888575	0.7604	1.60398	0.899602	0.693808	1.14441
ENSGALG00000010311	NAV3	ENSGALT00000016778	GO:0005524(ATP binding);GO:0008017(microtubule binding);GO:0007026(negative regulation of microtubule depolymerization);GO:0030336(negative regulation of cell migration);GO:0031116(positive regulation of microtubule polymerization);GO:0032703(negative regulation of interleukin-2 production);GO:1905929(positive regulation of invadopodium disassembly);GO:1990752(microtubule end)	NA	NA	NA	neuron navigator 3 [Source:HGNC Symbol;Acc:HGNC:15998]	93.7767	79.7793	78.9231	24.0993	21.9007	7.50244	8.61923	8.87554	4.45125	2.78814	2.74182	5.09494	3.31613	6.34614	3.51701	4.93938	3.69097
ENSGALG00000014999		ENSGALT00000024188	GO:0005874(microtubule);GO:0000226(microtubule cytoskeleton organization);GO:0008017(microtubule binding);GO:0007399(nervous system development)	NA	NA	NA		36.6403	35.7886	40.0483	13.9311	14.0516	4.83319	3.39878	4.44894	0.640483	0.419178	0.646096	1.67596	0.529289	0.888264	0.960731	0.880864	1.01692
ENSGALG00000037511	CNR1	ENSGALT00000080605	GO:0005886(plasma membrane);GO:0015629(actin cytoskeleton);GO:0030424(axon);GO:0042593(glucose homeostasis);GO:0030426(growth cone);GO:0004949(cannabinoid receptor activity);GO:0007188(adenylate cyclase-modulating G-protein coupled receptor signaling pathway);GO:0007413(axonal fasciculation);GO:0038171(cannabinoid signaling pathway);GO:0099553(trans-synaptic signaling by endocannabinoid, modulati…	04080(Neuroactive ligand-receptor interaction)	K04277	NA	cannabinoid receptor 1 [Source:HGNC Symbol;Acc:HGNC:2159]	67.9475	62.687	64.488	73.1642	66.1498	12.157	10.7339	10.829	5.2382	2.32394	2.12219	1.68323	2.42379	1.24334	1.16395	0.624734	0.641495
ENSGALG00000003465		ENSGALT00000034318	GO:0046872(metal ion binding);GO:0005509(calcium ion binding)	NA	NA	NA	Parvalbumin, thymic [Source:UniProtKB/Swiss-Prot;Acc:P19753]	557.83	689.534	696.433	140.258	136.327	2.91455	3.65798	2.81362	3.46963	3.02703	1.27715	1.02357	0.317267	2.63999	0.832987	0.397248	0.147266
ENSGALG00000043555	NPNT	ENSGALT00000074734	GO:0070062(extracellular exosome);GO:0001658(branching involved in ureteric bud morphogenesis);GO:0070374(positive regulation of ERK1 and ERK2 cascade);GO:0005578(proteinaceous extracellular matrix);GO:0031012(extracellular matrix);GO:0005615(extracellular space);GO:0071356(cellular response to tumor necrosis factor);GO:0007160(cell-matrix adhesion);GO:0005604(basement membrane);GO:0030198(extrac…	NA	NA	NA	nephronectin [Source:HGNC Symbol;Acc:HGNC:27405]	93.8046	125.108	113.003	22.506	42.8693	4.14693	9.6438	4.36573	1.61856	1.56097	2.32785	1.77246	1.63322	2.11206	1.31239	0.726515	1.86438
ENSGALG00000032984	MEX3B	ENSGALT00000078104;ENSGALT00000078318	GO:0003723(RNA binding);GO:0005654(nucleoplasm);GO:0005829(cytosol);GO:0005829(cytosol)	NA	NA	NA	mex-3 RNA binding family member B [Source:HGNC Symbol;Acc:HGNC:25297]	54.9485	51.1774	46.8392	20.3464	18.6027	5.05775	4.7968	4.79344	1.07905	1.19571	1.58091	2.88331	1.28055	1.71776	0.702499	1.27202	0.684321
ENSGALG00000034163	CRTAP	ENSGALT00000059373;ENSGALT00000060717	NA	NA	NA	NA	cartilage associated protein [Source:HGNC Symbol;Acc:HGNC:2379]	74.8624	61.3803	65.6003	70.5485	75.7568	24.5718	27.8777	33.1079	8.32287	8.05598	6.49009	5.95544	5.52172	6.43013	3.41638	4.45979	4.51651
ENSGALG00000033880	CRISPLD1	ENSGALT00000051981;ENSGALT00000076275	GO:0070062(extracellular exosome);GO:0060325(face morphogenesis);GO:0060325(face morphogenesis)	NA	NA	NA	cysteine-rich secretory protein LCCL domain-containing 1 precursor [Source:RefSeq peptide;Acc:NP_989985]	24.8485	24.7196	30.1723	10.9222	10.8383	6.46006	4.35457	5.49817	1.27583	0.79328	0.709407	0.703547	0.648437	0.563084	0.51353	0.641024	0.275046
ENSGALG00000026460		ENSGALT00000045992	GO:0035023(regulation of Rho protein signal transduction);GO:0005089(Rho guanyl-nucleotide exchange factor activity);GO:0065009(regulation of molecular function)	NA	NA	NA		24.2584	24.0061	23.3154	17.9315	18.4906	6.85076	8.49998	5.88926	1.36052	0.88859	1.25989	0.843393	0.453815	0.655328	0.490712	0.475641	0.582515
ENSGALG00000004418	SSTR2	ENSGALT00000038508	GO:0016020(membrane);GO:0005886(plasma membrane);GO:0005829(cytosol);GO:0007218(neuropeptide signaling pathway);GO:0007193(adenylate cyclase-inhibiting G-protein coupled receptor signaling pathway);GO:0007186(G-protein coupled receptor signaling pathway);GO:0030165(PDZ domain binding);GO:0004994(somatostatin receptor activity);GO:0071385(cellular response to glucocorticoid stimulus);GO:0043005(ne…	04080(Neuroactive ligand-receptor interaction)	K04218	NA	somatostatin receptor 2 [Source:HGNC Symbol;Acc:HGNC:11331]	18.2986	13.5195	17.1765	7.7789	5.78333	0.473601	0.853105	0.432658	0.117236	0.152393	0.253821	0.12748	0.045493	0.143253	0.355349	0.512156	0.396772
ENSGALG00000001472	JAM3	ENSGALT00000002230	GO:0044291(cell-cell contact zone);GO:0043220(Schmidt-Lanterman incisure);GO:0033010(paranodal junction);GO:0030057(desmosome);GO:0005923(bicellular tight junction);GO:0005911(cell-cell junction);GO:0005615(extracellular space);GO:0090138(regulation of actin cytoskeleton organization by cell-cell adhesion);GO:0090022(regulation of neutrophil chemotaxis);GO:0042552(myelination);GO:0030010(establis…	04514(Cell adhesion molecules (CAMs));04530(Tight junction)	K06785	NA	junctional adhesion molecule 3 [Source:HGNC Symbol;Acc:HGNC:15532]	196.918	222.421	207.328	43.2381	46.0526	22.0586	27.3534	27.3647	20.1181	12.3378	20.8014	9.19989	8.71062	11.1928	6.68016	10.7868	9.96834
ENSGALG00000004273	RALGPS2	ENSGALT00000006794;ENSGALT00000064580;ENSGALT00000064164	GO:0032485(regulation of Ral protein signal transduction);GO:0005085(guanyl-nucleotide exchange factor activity);GO:0007264(small GTPase mediated signal transduction);GO:0005737(cytoplasm);GO:0005886(plasma membrane);GO:0016020(membrane);GO:0065009(regulation of molecular function);GO:0065009(regulation of molecular function)	NA	NA	NA	Ral GEF with PH domain and SH3 binding motif 2 [Source:HGNC Symbol;Acc:HGNC:30279]	77.2344	88.6909	85.0121	39.5256	34.6853	13.5742	12.8714	13.3254	11.4967	7.42888	5.73351	4.15149	5.03611	4.52884	3.23621	4.45213	4.09231
ENSGALG00000011823	FAT4	ENSGALT00000019298	GO:0070062(extracellular exosome);GO:0045177(apical part of cell);GO:0072307(regulation of metanephric nephron tubule epithelial cell differentiation);GO:0072137(condensed mesenchymal cell proliferation);GO:0072006(nephron development);GO:0060122(inner ear receptor stereocilium organization);GO:0048565(digestive tract development);GO:0043931(ossification involved in bone maturation);GO:0035329(hi…	NA	NA	NA	FAT atypical cadherin 4 [Source:HGNC Symbol;Acc:HGNC:23109]	82.1447	66.6075	75.2952	60.8043	59.543	16.8785	16.4494	18.7225	3.29369	3.75312	5.56257	3.7886	3.09974	3.548	2.00362	4.24591	3.87178
ENSGALG00000015403	EPHA3	ENSGALT00000024844	GO:0005887(integral component of plasma membrane);GO:0005769(early endosome);GO:0071300(cellular response to retinoic acid);GO:0070507(regulation of microtubule cytoskeleton organization);GO:0051893(regulation of focal adhesion assembly);GO:0048013(ephrin receptor signaling pathway);GO:0043087(regulation of GTPase activity);GO:0032956(regulation of actin cytoskeleton organization);GO:0010976(posi…	NA	NA	NA	EPH receptor A3 [Source:HGNC Symbol;Acc:HGNC:3387]	51.976	54.9658	52.5463	40.8151	37.6795	14.469	10.4125	13.9948	5.07885	5.83906	5.6417	4.2589	3.63815	3.31737	2.26009	3.73165	2.57702
ENSGALG00000037545	GRIP2	ENSGALT00000078002;ENSGALT00000049228	GO:0007219(Notch signaling pathway);GO:0045777(positive regulation of blood pressure);GO:0014824(artery smooth muscle contraction);GO:0014824(artery smooth muscle contraction)	NA	NA	NA	glutamate receptor interacting protein 2 [Source:HGNC Symbol;Acc:HGNC:23841]	49.3997	66.554	55.9538	41.1658	44.678	9.4869	10.201	11.5414	3.91974	2.16871	2.3353	6.73123	7.57275	7.51808	1.41073	2.36961	2.10284
ENSGALG00000002467	MTSS1L	ENSGALT00000003894	GO:0030864(cortical actin cytoskeleton);GO:0030027(lamellipodium);GO:0005886(plasma membrane);GO:0001726(ruffle);GO:0097178(ruffle assembly);GO:0097581(lamellipodium organization);GO:0007009(plasma membrane organization);GO:0061024(membrane organization);GO:0048365(Rac GTPase binding);GO:0005546(phosphatidylinositol-4,5-bisphosphate binding);GO:0003785(actin monomer binding);GO:0003779(actin bind…	NA	NA	NA	MTSS1L, I-BAR domain containing [Source:HGNC Symbol;Acc:HGNC:25094]	171.867	213.382	185.549	113.499	111.725	26.3935	36.2247	24.8289	11.4561	7.57595	12.7825	8.52233	7.70657	9.67357	3.87471	6.63751	9.05263
ENSGALG00000011831	ANKRD50	ENSGALT00000019307	GO:1990126(retrograde transport, endosome to plasma membrane);GO:0005622(intracellular)	NA	NA	NA	ankyrin repeat domain 50 [Source:HGNC Symbol;Acc:HGNC:29223]	142.706	153.817	147.902	107.766	97.524	28.9164	30.7607	35.9544	13.1509	10.5209	14.194	12.5154	11.8687	10.4653	8.69564	13.7097	9.94426
ENSGALG00000028685	SEMA5A	ENSGALT00000044841;ENSGALT00000055069	GO:0016021(integral component of membrane);GO:0016020(membrane);GO:0070062(extracellular exosome);GO:0070062(extracellular exosome)	NA	NA	NA	semaphorin 5A [Source:HGNC Symbol;Acc:HGNC:10736]	30.1807	29.7063	28.4308	75.2033	70.9486	18.2783	17.5861	19.8848	3.24439	2.84969	5.15245	2.57115	2.45572	2.92962	1.93314	3.86796	2.52616
ENSGALG00000015084	IGSF11	ENSGALT00000024333	GO:0070062(extracellular exosome);GO:0016021(integral component of membrane);GO:0016020(membrane)	NA	NA	NA	immunoglobulin superfamily member 11 [Source:HGNC Symbol;Acc:HGNC:16669]	20.8227	22.7045	20.0244	45.3134	53.3784	6.29284	5.68687	4.30094	2.83646	2.66251	3.83616	2.2935	1.21865	1.95579	0.608733	0.980427	0.847111
ENSGALG00000043033	EYA1	ENSGALT00000076729;ENSGALT00000052286;ENSGALT00000074711;ENSGALT00000049593;ENSGALT00000076788	GO:0010212(response to ionizing radiation);GO:0016925(protein sumoylation);GO:0005634(nucleus);GO:0045893(positive regulation of transcription, DNA-templated);GO:0032993(protein-DNA complex);GO:0006302(double-strand break repair);GO:0004725(protein tyrosine phosphatase activity);GO:0005737(cytoplasm);GO:0045739(positive regulation of DNA repair);GO:0005654(nucleoplasm);GO:0045944(positive regulat…	NA	NA	NA	EYA transcriptional coactivator and phosphatase 1 [Source:HGNC Symbol;Acc:HGNC:3519]	30.3988	46.1012	41.8345	61.1531	60.4006	16.0535	27.8532	25.1634	6.89371	5.57141	4.45815	2.81631	3.26961	1.92444	0.825478	1.32305	0.851394
ENSGALG00000026359	SERTAD4	ENSGALT00000043743;ENSGALT00000046112	GO:0005634(nucleus);GO:0005634(nucleus)	NA	NA	NA	SERTA domain containing 4 [Source:HGNC Symbol;Acc:HGNC:25236]	69.3315	78.7651	80.439	49.8661	51.3481	16.8096	21.9236	19.7316	4.46304	4.2046	6.70924	6.24005	4.81174	5.16197	2.8401	3.11809	3.31579
ENSGALG00000005499	IL17RD	ENSGALT00000008827;ENSGALT00000061152	GO:0005794(Golgi apparatus);GO:0005654(nucleoplasm);GO:0005654(nucleoplasm)	NA	NA	NA	interleukin 17 receptor D [Source:HGNC Symbol;Acc:HGNC:17616]	29.9756	27.9428	28.3716	9.40964	9.62153	2.87428	3.21154	4.83393	1.29843	1.3606	0.696811	0.903518	0.550045	0.613754	0.736047	0.913607	0.480378
ENSGALG00000025862	TMEM26	ENSGALT00000043639	GO:0016021(integral component of membrane);GO:0016020(membrane)	NA	NA	NA	transmembrane protein 26 [Source:HGNC Symbol;Acc:HGNC:28550]	33.4914	24.0841	27.9944	8.15028	7.38037	3.30891	3.22481	2.35292	0.622937	0.715753	0.481066	1.40991	1.12963	1.54639	0.570655	1.01683	0.49674
ENSGALG00000010316	FRAS1	ENSGALT00000038383	GO:0061618(sublamina densa);GO:0005604(basement membrane);GO:0060021(palate development);GO:0043588(skin development);GO:0030326(embryonic limb morphogenesis);GO:0015031(protein transport);GO:0003338(metanephros morphogenesis);GO:0002009(morphogenesis of an epithelium);GO:0031012(extracellular matrix);GO:0007154(cell communication);GO:0016021(integral component of membrane);GO:0016020(membrane)	NA	NA	NA	Fraser extracellular matrix complex subunit 1 [Source:HGNC Symbol;Acc:HGNC:19185]	115.745	132.38	106.273	51.0567	47.9246	12.0092	5.0229	9.94604	5.85705	8.22062	5.43227	2.19204	0.719057	2.09947	1.01701	1.24701	1.46025
ENSGALG00000014233	FBLN1	ENSGALT00000023014;ENSGALT00000084705	GO:0071953(elastic fiber);GO:0070062(extracellular exosome);GO:0031012(extracellular matrix);GO:0005615(extracellular space);GO:0005604(basement membrane);GO:0005578(proteinaceous extracellular matrix);GO:0005577(fibrinogen complex);GO:2000647(negative regulation of stem cell proliferation);GO:2000146(negative regulation of cell motility);GO:1900025(negative regulation of substrate adhesion-depen…	NA	NA	NA	fibulin 1 [Source:HGNC Symbol;Acc:HGNC:3600]	93.6963	95.2627	109.715	27.8885	28.0996	12.6399	12.6375	13.275	2.47231	2.26058	2.37114	3.42264	2.10272	6.52686	2.82891	3.61022	1.77883
ENSGALG00000031688		ENSGALT00000054621	NA	NA	NA	NA		52.0095	52.0713	43.8164	37.3298	35.3338	12.3265	14.5127	16.856	4.01196	3.1819	2.82236	3.63397	3.62874	3.82128	3.98971	4.67576	4.67044
ENSGALG00000010818		ENSGALT00000017589	GO:0005886(plasma membrane);GO:1902068(regulation of sphingolipid mediated signaling pathway);GO:0060070(canonical Wnt signaling pathway);GO:0060020(Bergmann glial cell differentiation);GO:0051091(positive regulation of sequence-specific DNA binding transcription factor activity);GO:0050821(protein stabilization);GO:0046839(phospholipid dephosphorylation);GO:0050731(positive regulation of peptidy…	00561(Glycerolipid metabolism);00564(Glycerophospholipid metabolism);00565(Ether lipid metabolism);00600(Sphingolipid metabolism)	K01080	EC:3.1.3.4		233.144	270.696	294.596	455.915	447.712	159.937	221.986	219.233	32.6561	24.0641	27.2903	25.1915	16.6156	26.3371	18.7224	28.8427	22.7254
ENSGALG00000037675	COL14A1	ENSGALT00000077854;ENSGALT00000049144;ENSGALT00000063250;ENSGALT00000053447;ENSGALT00000077257	GO:0003723(RNA binding);GO:0070062(extracellular exosome);GO:0031012(extracellular matrix);GO:0005615(extracellular space);GO:0005576(extracellular region);GO:0005576(extracellular region)	NA	NA	NA	collagen type XIV alpha 1 chain [Source:HGNC Symbol;Acc:HGNC:2191]	125.559	127.381	142.662	157.114	165.851	17.1316	17.0191	18.7176	1.65408	1.08676	2.09384	2.64464	2.35493	0.624431	0.783497	1.53022	2.33748
ENSGALG00000009424	FOXP2	ENSGALT00000015345	GO:0060501(positive regulation of epithelial cell proliferation involved in lung morphogenesis);GO:0060013(righting reflex);GO:0050679(positive regulation of epithelial cell proliferation);GO:0048745(smooth muscle tissue development);GO:0048286(lung alveolus development);GO:0045892(negative regulation of transcription, DNA-templated);GO:0042297(vocal learning);GO:0043010(camera-type eye developme…	NA	NA	NA	forkhead box P2 [Source:HGNC Symbol;Acc:HGNC:13875]	26.9489	23.8289	25.6551	15.1051	16.7905	11.1989	10.8135	11.4935	2.27272	2.37429	1.74865	1.28019	1.37464	0.931381	1.62293	1.94068	1.1822
ENSGALG00000015419	PENK	ENSGALT00000024871	GO:0019233(sensory perception of pain);GO:0007626(locomotory behavior);GO:0002118(aggressive behavior);GO:0001964(startle response);GO:0001662(behavioral fear response);GO:0043679(axon terminus);GO:0007600(sensory perception);GO:0031628(opioid receptor binding);GO:0005184(neuropeptide hormone activity);GO:0043025(neuronal cell body);GO:0030425(dendrite);GO:0007268(chemical synaptic transmission);…	NA	NA	NA	proenkephalin [Source:HGNC Symbol;Acc:HGNC:8831]	395.08	442.142	364.158	56.3806	69.489	74.9832	47.4796	55.693	32.0965	13.6305	15.6889	10.5231	6.32857	6.08073	1.79588	4.85632	2.94282
ENSGALG00000007079	PAPPA	ENSGALT00000011469;ENSGALT00000057828	GO:0004222(metalloendopeptidase activity);GO:0006508(proteolysis);GO:0004175(endopeptidase activity);GO:0008237(metallopeptidase activity);GO:0005576(extracellular region);GO:0005615(extracellular space);GO:0005615(extracellular space)	NA	NA	NA	pappalysin 1 [Source:HGNC Symbol;Acc:HGNC:8602]	23.3976	18.3401	22.7474	19.6374	15.6041	10.5015	15.4414	12.7446	2.31587	2.10875	2.39336	0.86955	1.25285	1.46816	0.951945	0.864618	1.24669
ENSGALG00000026940	TTYH2	ENSGALT00000046149	GO:0034707(chloride channel complex);GO:0005254(chloride channel activity);GO:0006821(chloride transport);GO:1902476(chloride transmembrane transport);GO:0006811(ion transport);GO:0006810(transport);GO:0005886(plasma membrane);GO:0016021(integral component of membrane);GO:0016020(membrane)	NA	NA	NA	tweety family member 2 [Source:HGNC Symbol;Acc:HGNC:13877]	82.9221	89.9956	76.624	36.5688	30.1708	21.289	16.9633	18.8098	5.65419	4.85487	6.13269	2.38771	2.39433	5.05215	1.49798	2.49144	2.0257
ENSGALG00000015729	LPAR1	ENSGALT00000025366;ENSGALT00000089257	GO:0030139(endocytic vesicle);GO:0009986(cell surface);GO:0005887(integral component of plasma membrane);GO:0005886(plasma membrane);GO:0005768(endosome);GO:0060326(cell chemotaxis);GO:0051496(positive regulation of stress fiber assembly);GO:0051482(positive regulation of cytosolic calcium ion concentration involved in phospholipase C-activating G-protein coupled signaling pathway);GO:0043410(pos…	04080(Neuroactive ligand-receptor interaction);04540(Gap junction);04540(Gap junction)	K04289	NA	lysophosphatidic acid receptor 1 [Source:HGNC Symbol;Acc:HGNC:3166]	62.6514	54.7259	54.7796	13.9239	17.6996	5.70766	7.36188	6.15115	1.9979	1.62798	2.6865	2.90154	2.07873	2.00597	0.988886	2.34291	1.17507
ENSGALG00000006958		ENSGALT00000011272;ENSGALT00000043723	NA	NA	NA	NA		11.102	9.81063	8.75074	4.56074	5.21937	2.51353	4.03579	2.76787	0.57787	0.472505	0.504946	0.343975	0.36939	0.596975	0.188602	0.154774	0.12757
ENSGALG00000017179	PDGFD	ENSGALT00000030073	GO:0005615(extracellular space);GO:0070062(extracellular exosome);GO:0071230(cellular response to amino acid stimulus);GO:0050730(regulation of peptidyl-tyrosine phosphorylation);GO:0005161(platelet-derived growth factor receptor binding);GO:0048008(platelet-derived growth factor receptor signaling pathway);GO:0043406(positive regulation of MAP kinase activity);GO:0031954(positive regulation of p…	04060(Cytokine-cytokine receptor interaction);04510(Focal adhesion);04540(Gap junction);04810(Regulation of actin cytoskeleton)	K05450	NA	platelet derived growth factor D [Source:HGNC Symbol;Acc:HGNC:30620]	129.248	103.172	102.342	71.925	60.325	31.6657	23.337	33.923	11.1202	8.66064	10.5423	5.50741	4.1148	7.43965	5.15539	5.35169	7.52454
ENSGALG00000000505	KCNH6	ENSGALT00000031464	GO:0005249(voltage-gated potassium channel activity);GO:0034765(regulation of ion transmembrane transport);GO:0005244(voltage-gated ion channel activity);GO:0071805(potassium ion transmembrane transport);GO:0006813(potassium ion transport);GO:0006811(ion transport);GO:0005267(potassium channel activity);GO:0005216(ion channel activity);GO:0006810(transport);GO:0005887(integral component of plasma…	NA	NA	NA	Potassium voltage-gated channel subfamily H member 6 [Source:UniProtKB/Swiss-Prot;Acc:Q9PT84]	19.3195	20.2239	18.7757	10.1973	12.1174	6.11132	9.87212	8.37316	1.97096	1.68588	3.21231	0.610451	0.650587	1.08318	0.11903	0.212449	0.202644
ENSGALG00000005156		ENSGALT00000008280	GO:0006508(proteolysis);GO:0008236(serine-type peptidase activity);GO:0004252(serine-type endopeptidase activity);GO:0016787(hydrolase activity);GO:0008233(peptidase activity);GO:0006898(receptor-mediated endocytosis);GO:0005044(scavenger receptor activity);GO:0016020(membrane)	NA	NA	NA		35.6796	24.1292	27.9117	15.7103	15.0623	7.02234	7.71821	4.85162	1.37343	1.03395	1.15719	1.04264	1.04447	1.0616	1.22144	0.657714	0.534849
ENSGALG00000031597	HBAD	ENSGALT00000060227;ENSGALT00000089577	GO:0070062(extracellular exosome);GO:0005833(hemoglobin complex);GO:0015671(oxygen transport);GO:0005344(oxygen carrier activity);GO:0019825(oxygen binding);GO:0020037(heme binding);GO:0006810(transport);GO:0005506(iron ion binding);GO:0046872(metal ion binding);GO:0046872(metal ion binding)	NA	NA	NA	Hemoglobin subunit alpha-D [Source:UniProtKB/Swiss-Prot;Acc:P02001]	340.767	357.945	267.476	333.123	189.88	60.258	83.5359	66.3054	47.2176	32.8796	50.1097	3.54446	5.47318	7.66077	11.5371	5.88417	9.24625
ENSGALG00000011686	SEMA5B	ENSGALT00000062580;ENSGALT00000075814;ENSGALT00000019105;ENSGALT00000057754	GO:1990138(neuron projection extension);GO:0097485(neuron projection guidance);GO:0050908(detection of light stimulus involved in visual perception);GO:0048675(axon extension);GO:0005615(extracellular space);GO:0016021(integral component of membrane);GO:0016020(membrane);GO:0050919(negative chemotaxis);GO:0038191(neuropilin binding);GO:0038191(neuropilin binding)	NA	NA	NA	semaphorin 5B [Source:HGNC Symbol;Acc:HGNC:10737]	37.1451	33.8657	39.7336	34.606	30.7674	12.4057	15.1708	15.0685	4.34119	4.87897	4.076	3.56988	3.42423	3.04012	5.45629	4.19775	4.04043
ENSGALG00000029503	AES	ENSGALT00000061871	GO:0005634(nucleus);GO:0045892(negative regulation of transcription, DNA-templated);GO:0090090(negative regulation of canonical Wnt signaling pathway);GO:0006357(regulation of transcription from RNA polymerase II promoter);GO:0010629(negative regulation of gene expression);GO:0040008(regulation of growth);GO:0001501(skeletal system development);GO:0000122(negative regulation of transcription from…	NA	NA	NA	amino-terminal enhancer of split [Source:HGNC Symbol;Acc:HGNC:307]	292.984	288.398	299.215	282.28	327.838	193.461	191.624	203.589	60.9035	46.9464	49.7889	29.8846	32.4232	29.1725	17.027	21.4311	26.9889
ENSGALG00000026600	C1orf198	ENSGALT00000045254	GO:0005829(cytosol)	NA	NA	NA	chromosome 1 open reading frame 198 [Source:HGNC Symbol;Acc:HGNC:25900]	53.4627	39.3507	53.7087	18.1971	23.6142	7.4523	8.25944	8.81126	1.84417	2.29683	2.28743	3.49014	2.29375	2.76707	2.6207	2.61374	1.82721
ENSGALG00000040266	GLI3	ENSGALT00000056531	NA	04340(Hedgehog signaling pathway)	K06230	NA	GLI family zinc finger 3 [Source:HGNC Symbol;Acc:HGNC:4319]	37.6619	35.6024	37.5135	19.445	18.6107	6.9765	10.5535	8.84267	3.43964	2.95334	2.61536	3.08445	2.44108	2.67094	2.17895	3.30604	2.13199
ENSGALG00000002294	SEMA6A	ENSGALT00000054585;ENSGALT00000067390;ENSGALT00000082049;ENSGALT00000003608;ENSGALT00000062503	GO:0016021(integral component of membrane);GO:0016020(membrane);GO:0005887(integral component of plasma membrane);GO:2001224(positive regulation of neuron migration);GO:0071526(semaphorin-plexin signaling pathway);GO:0007411(axon guidance);GO:0051642(centrosome localization);GO:0007166(cell surface receptor signaling pathway);GO:0001764(neuron migration);GO:0030215(semaphorin receptor binding);GO…	NA	NA	NA	semaphorin 6A [Source:HGNC Symbol;Acc:HGNC:10738]	75.8752	85.7228	86.8934	33.644	35.5628	20.9573	21.8902	21.3228	11.4399	7.4711	7.68358	6.75128	7.02472	6.08116	3.19426	5.5545	4.11315
ENSGALG00000009556	PRICKLE1	ENSGALT00000015558;ENSGALT00000077783	GO:0046872(metal ion binding);GO:0008270(zinc ion binding);GO:0005634(nucleus);GO:0006606(protein import into nucleus);GO:0031965(nuclear membrane);GO:0005829(cytosol);GO:0001843(neural tube closure);GO:0060976(coronary vasculature development);GO:0045892(negative regulation of transcription, DNA-templated);GO:0090090(negative regulation of canonical Wnt signaling pathway);GO:0035904(aorta develo…	04310(Wnt signaling pathway);04310(Wnt signaling pathway)	K04511	NA	prickle planar cell polarity protein 1 [Source:HGNC Symbol;Acc:HGNC:17019]	53.642	43.5727	46.0835	13.811	18.2779	8.48899	11.2552	10.7109	2.87057	2.947	3.18585	3.75554	4.97023	4.3072	2.52645	3.63784	3.17621
ENSGALG00000012857	DENND2A	ENSGALT00000020969;ENSGALT00000079220	GO:0015629(actin cytoskeleton);GO:0042147(retrograde transport, endosome to Golgi);GO:0017112(Rab guanyl-nucleotide exchange factor activity);GO:0017112(Rab guanyl-nucleotide exchange factor activity)	NA	NA	NA	DENN domain containing 2A [Source:HGNC Symbol;Acc:HGNC:22212]	83.0351	82.3711	81.3399	61.8244	55.4952	33.153	39.0671	35.7018	8.39444	6.17251	8.20381	8.49717	9.15008	7.58547	5.79522	8.95146	6.45798
ENSGALG00000008883	TCF7L2	ENSGALT00000014436;ENSGALT00000069455;ENSGALT00000033106	GO:0070369(beta-catenin-TCF7L2 complex);GO:0032993(protein-DNA complex);GO:0005654(nucleoplasm);GO:0005634(nucleus);GO:0000790(nuclear chromatin);GO:0090090(negative regulation of canonical Wnt signaling pathway);GO:0060070(canonical Wnt signaling pathway);GO:0051897(positive regulation of protein kinase B signaling);GO:0048660(regulation of smooth muscle cell proliferation);GO:0048625(myoblast f…	04310(Wnt signaling pathway);04520(Adherens junction);04916(Melanogenesis);04916(Melanogenesis)	K04491	NA	transcription factor 7 like 2 [Source:HGNC Symbol;Acc:HGNC:11641]	80.3332	72.8594	86.2125	36.6209	33.609	17.8359	26.8223	23.2633	9.35818	8.09741	8.43306	8.43645	8.65923	7.16314	5.70839	6.48866	6.45812
ENSGALG00000029264	PI15	ENSGALT00000065508	GO:0010466(negative regulation of peptidase activity);GO:0030414(peptidase inhibitor activity);GO:0007275(multicellular organism development);GO:0005576(extracellular region);GO:0070062(extracellular exosome)	NA	NA	NA	Peptidase inhibitor 15 [Source:UniProtKB/Swiss-Prot;Acc:Q98ST6]	39.074	34.1509	38.9192	27.9845	28.162	4.83784	2.98743	2.77667	1.80171	1.88141	2.36109	2.46484	1.891	0.982104	0.349561	0.253776	0.538791
ENSGALG00000035065	FAM110B	ENSGALT00000070364	NA	NA	NA	NA	family with sequence similarity 110 member B [Source:HGNC Symbol;Acc:HGNC:28587]	77.7572	58.1892	58.0545	36.5422	32.2193	4.52198	7.95057	6.00085	1.635	0.575075	1.63133	2.34096	2.40092	1.49081	1.23452	1.10268	1.89499
ENSGALG00000011663	FNDC1	ENSGALT00000019065	GO:0016607(nuclear speck)	NA	NA	NA	fibronectin type III domain containing 1 [Source:HGNC Symbol;Acc:HGNC:21184]	69.8327	61.1411	75.463	191.116	168.72	61.5348	72.1619	69.2772	11.2022	10.4909	15.2951	9.97582	6.22975	7.76065	6.13506	4.72797	9.41213
ENSGALG00000015101	BNC2	ENSGALT00000070190;ENSGALT00000024363;ENSGALT00000051957;ENSGALT00000051175	GO:0003676(nucleic acid binding);GO:0005634(nucleus);GO:0005829(cytosol);GO:0005886(plasma membrane);GO:0003677(DNA binding);GO:0060485(mesenchyme development);GO:0060021(palate development);GO:0043586(tongue development);GO:0003416(endochondral bone growth);GO:0003416(endochondral bone growth)	NA	NA	NA	basonuclin 2 [Source:HGNC Symbol;Acc:HGNC:30988]	23.5601	18.4827	19.7376	11.4972	11.3173	4.52148	4.37809	4.97018	1.69389	1.16615	1.06558	1.64223	1.10202	1.33332	1.08015	1.17468	0.629813
ENSGALG00000005363	CHDH	ENSGALT00000008609	GO:0005743(mitochondrial inner membrane);GO:0005739(mitochondrion);GO:0019285(glycine betaine biosynthetic process from choline);GO:0016614(oxidoreductase activity, acting on CH-OH group of donors);GO:0008812(choline dehydrogenase activity);GO:0050660(flavin adenine dinucleotide binding);GO:0055114(oxidation-reduction process)	00260(Glycine, serine and threonine metabolism)	K00108	EC:1.1.99.1	choline dehydrogenase [Source:HGNC Symbol;Acc:HGNC:24288]	19.613	20.1211	17.827	17.9004	15.7697	3.20707	2.31203	4.71099	0.925097	0.850282	0.643149	0.941241	0.525083	0.576996	0.481481	0.61417	0.253397
ENSGALG00000005930	PLS3	ENSGALT00000009540;ENSGALT00000072838;ENSGALT00000085774	GO:0005886(plasma membrane);GO:0005829(cytosol);GO:0060348(bone development);GO:0032432(actin filament bundle);GO:0051639(actin filament network formation);GO:0005884(actin filament);GO:0051764(actin crosslink formation);GO:0051017(actin filament bundle assembly);GO:0051015(actin filament binding);GO:0005737(cytoplasm);GO:0003779(actin binding);GO:0005509(calcium ion binding);GO:0005509(calcium i…	NA	NA	NA	plastin 3 [Source:HGNC Symbol;Acc:HGNC:9091]	107.953	111.914	108.631	33.9421	34.5437	24.1289	19.1738	20.0512	14.8534	10.2013	10.3577	8.30158	7.30188	10.2869	8.72564	8.49015	10.0201
ENSGALG00000035419	CDON	ENSGALT00000072175	NA	04340(Hedgehog signaling pathway)	K20033	NA	cell adhesion associated, oncogene regulated [Source:HGNC Symbol;Acc:HGNC:17104]	22.3785	21.4423	21.4	17.4363	15.035	14.4907	15.3979	15.2274	2.6223	2.13836	3.31023	2.10103	1.72058	2.10269	1.02033	1.70419	1.56687
ENSGALG00000042134		ENSGALT00000083087;ENSGALT00000065142	NA	NA	NA	NA		36.8515	31.279	31.7352	20.7747	20.1859	3.9715	4.03061	2.40618	0.957001	0.844105	0.962446	1.22367	0.751688	2.62668	1.11705	1.25883	0.925373
ENSGALG00000033618	MYO9A	ENSGALT00000070067;ENSGALT00000046262;ENSGALT00000067721	GO:0034329(cell junction assembly);GO:0045198(establishment of epithelial cell apical/basal polarity);GO:0045198(establishment of epithelial cell apical/basal polarity)	NA	NA	NA	myosin IXA [Source:HGNC Symbol;Acc:HGNC:7608]	61.465	66.173	56.2581	59.8367	50.353	13.5052	16.0491	16.428	4.66373	4.4312	5.89751	4.9388	5.00863	8.18183	4.04265	5.71776	3.97927
ENSGALG00000002790	ABLIM3	ENSGALT00000004410	GO:0030027(lamellipodium);GO:0001725(stress fiber);GO:1903955(positive regulation of protein targeting to mitochondrion);GO:0060271(cilium assembly);GO:0045944(positive regulation of transcription from RNA polymerase II promoter);GO:0030032(lamellipodium assembly);GO:0007010(cytoskeleton organization);GO:0006351(transcription, DNA-templated);GO:0030036(actin cytoskeleton organization);GO:0003779(…	NA	NA	NA	actin binding LIM protein family member 3 [Source:HGNC Symbol;Acc:HGNC:29132]	31.7136	34.599	45.2235	22.3807	22.3299	3.74645	3.87866	2.96008	0.917841	0.553121	1.5662	1.20165	1.45345	1.44702	0.80783	1.32505	1.72153
ENSGALG00000038678	EPB41L3	ENSGALT00000061982;ENSGALT00000074394;ENSGALT00000056089;ENSGALT00000055548;ENSGALT00000063506;ENSGALT00000080153;ENSGALT00000056188	GO:0005886(plasma membrane);GO:0033270(paranode region of axon);GO:0072659(protein localization to plasma membrane);GO:0014069(postsynaptic density);GO:0044224(juxtaparanode region of axon);GO:0008360(regulation of cell shape);GO:0030673(axolemma);GO:0002175(protein localization to paranode region of axon);GO:0030913(paranodal junction assembly);GO:0043217(myelin maintenance);GO:0048812(neuron pr…	NA	NA	NA	erythrocyte membrane protein band 4.1 like 3 [Source:HGNC Symbol;Acc:HGNC:3380]	85.5267	84.2681	87.7626	45.7035	40.7313	24.5915	21.903	26.0488	15.1347	11.0803	9.45156	6.34024	5.20939	7.33231	3.28084	4.06548	2.1012
ENSGALG00000017334	DCHS1	ENSGALT00000028013	GO:0005886(plasma membrane);GO:0007156(homophilic cell adhesion via plasma membrane adhesion molecules);GO:0007155(cell adhesion);GO:0005509(calcium ion binding);GO:0016021(integral component of membrane);GO:0016020(membrane);GO:0001658(branching involved in ureteric bud morphogenesis);GO:0001822(kidney development);GO:0003007(heart morphogenesis);GO:0003183(mitral valve morphogenesis);GO:0003192…	NA	NA	NA	dachsous cadherin-related 1 [Source:HGNC Symbol;Acc:HGNC:13681]	46.6783	39.3618	42.9638	26.8806	25.8406	9.27962	12.6856	8.95898	2.40646	2.43049	4.2162	3.03442	3.31474	2.95384	3.5751	4.01208	4.84782
ENSGALG00000039553	SULF1	ENSGALT00000082817;ENSGALT00000046842;ENSGALT00000053548	GO:0009986(cell surface);GO:0048706(embryonic skeletal system development);GO:0045121(membrane raft);GO:0008449(N-acetylglucosamine-6-sulfatase activity);GO:0051216(cartilage development);GO:0030336(negative regulation of cell migration);GO:0005615(extracellular space);GO:0005783(endoplasmic reticulum);GO:0005886(plasma membrane);GO:0030177(positive regulation of Wnt signaling pathway);GO:0001937…	NA	NA	NA	sulfatase 1 [Source:HGNC Symbol;Acc:HGNC:20391]	17.6294	13.0997	14.2409	24.5429	24.9932	5.9774	6.77557	8.78012	1.17276	1.29336	0.836011	1.04495	0.810652	1.52799	0.742975	0.420079	0.334148
ENSGALG00000041255	ADAM12	ENSGALT00000063442;ENSGALT00000050667	GO:0005886(plasma membrane);GO:0005654(nucleoplasm);GO:0005615(extracellular space);GO:0017124(SH3 domain binding);GO:0017124(SH3 domain binding)	NA	NA	NA	ADAM metallopeptidase domain 12 [Source:HGNC Symbol;Acc:HGNC:190]	41.8541	38.4635	38.5871	22.9914	17.1598	5.62338	4.27919	3.32935	0.766067	0.575129	0.852707	1.68099	0.306553	0.929219	0.45496	0.278294	0.438098
ENSGALG00000034860	BCHE	ENSGALT00000052772	GO:0072562(blood microparticle);GO:0005783(endoplasmic reticulum);GO:0005641(nuclear envelope lumen);GO:0042802(identical protein binding);GO:0004104(cholinesterase activity);GO:0003990(acetylcholinesterase activity);GO:0052689(carboxylic ester hydrolase activity);GO:0016787(hydrolase activity);GO:0005615(extracellular space)	NA	NA	NA	butyrylcholinesterase [Source:HGNC Symbol;Acc:HGNC:983]	15.7546	15.861	14.6873	33.8523	35.4997	9.65629	8.14511	10.0762	2.68758	1.82926	1.40794	1.42195	0.659653	0.859462	0.633341	0.877031	0.580354
ENSGALG00000008764	FAM171A1	ENSGALT00000014256	GO:0070062(extracellular exosome);GO:0016021(integral component of membrane);GO:0016020(membrane)	NA	NA	NA	family with sequence similarity 171 member A1 [Source:HGNC Symbol;Acc:HGNC:23522]	49.5318	46.6821	46.9182	27.6896	24.8142	23.538	21.0021	23.151	6.49744	4.0866	4.76813	3.66349	3.29972	4.78152	3.48583	4.01081	3.41683
ENSGALG00000032779		ENSGALT00000065980	NA	NA	NA	NA		127.161	105.234	119.806	82.5064	80.0238	19.66	34.0035	20.538	7.65394	3.75927	6.07011	11.6292	9.08246	8.23287	4.45275	6.5371	5.83526
ENSGALG00000009738	CTBP2	ENSGALT00000015848	GO:0051287(NAD binding);GO:0042803(protein homodimerization activity);GO:1903507(negative regulation of nucleic acid-templated transcription);GO:0005829(cytosol);GO:0003714(transcription corepressor activity);GO:0016616(oxidoreductase activity, acting on the CH-OH group of donors, NAD or NADP as acceptor);GO:0005634(nucleus);GO:0055114(oxidation-reduction process);GO:0016491(oxidoreductase activi…	04310(Wnt signaling pathway);04330(Notch signaling pathway)	K04496	NA	C-terminal binding protein 2 [Source:HGNC Symbol;Acc:HGNC:2495]	57.0045	47.9769	52.1235	20.8048	22.8486	12.4994	15.5579	14.7924	4.29038	3.19511	3.90179	3.89421	3.02666	3.40218	2.94457	3.85086	3.06963
ENSGALG00000016397		ENSGALT00000026447	NA	NA	NA	NA		28.6177	35.7916	32.5493	23.2435	16.8579	3.44081	6.9232	3.85865	2.15402	1.50638	2.1931	2.01041	1.59443	1.62391	1.03157	1.05718	1.35071
ENSGALG00000041204	IGF2BP1	ENSGALT00000052497;ENSGALT00000080686;ENSGALT00000077065	GO:0070937(CRD-mediated mRNA stability complex);GO:0030426(growth cone);GO:0030027(lamellipodium);GO:0030175(filopodium);GO:0003730(mRNA 3'-UTR binding);GO:0003729(mRNA binding);GO:0010976(positive regulation of neuron projection development);GO:0017148(negative regulation of translation);GO:0051028(mRNA transport);GO:0048471(perinuclear region of cytoplasm);GO:0003723(RNA binding);GO:0042995(cel…	NA	NA	NA	Insulin-like growth factor 2 mRNA-binding protein 1 [Source:UniProtKB/Swiss-Prot;Acc:O42254]	51.8616	54.4651	47.5832	21.5793	22.8653	18.7588	16.993	15.9686	12.3989	11.5815	11.2116	5.29979	6.671	6.66331	2.10176	1.37367	1.59274
ENSGALG00000002125	TMOD1	ENSGALT00000003322	GO:0042383(sarcolemma);GO:0030017(sarcomere);GO:0030863(cortical cytoskeleton);GO:0030016(myofibril);GO:0016020(membrane);GO:0008180(COP9 signalosome);GO:0005884(actin filament);GO:0070307(lens fiber cell development);GO:0030239(myofibril assembly);GO:0008344(adult locomotory behavior);GO:0006936(muscle contraction);GO:0005523(tropomyosin binding);GO:0003779(actin binding);GO:0043034(costamere);G…	NA	NA	NA	tropomodulin 1 [Source:HGNC Symbol;Acc:HGNC:11871]	62.4105	74.4973	68.971	166.312	172.796	36.1004	43.6558	40.1413	10.4046	13.2691	16.4481	14.8402	8.57977	7.12792	4.44098	5.12926	3.11095
ENSGALG00000005986	TUB	ENSGALT00000070472;ENSGALT00000063633;ENSGALT00000059479	GO:0007605(sensory perception of sound);GO:0032403(protein complex binding);GO:0005829(cytosol);GO:0050766(positive regulation of phagocytosis);GO:0005576(extracellular region);GO:0060041(retina development in camera-type eye);GO:0097500(receptor localization to non-motile cilium);GO:0006910(phagocytosis, recognition);GO:0045494(photoreceptor cell maintenance);GO:1903546(protein localization to p…	NA	NA	NA	tubby bipartite transcription factor [Source:HGNC Symbol;Acc:HGNC:12406]	37.921	46.6813	49.251	25.7748	28.3671	9.56756	9.94961	8.18677	4.56707	3.19148	3.33106	3.63029	3.68125	2.8033	2.67566	3.13722	2.34752
ENSGALG00000013001	CTNND2	ENSGALT00000037100;ENSGALT00000023413	GO:0060997(dendritic spine morphogenesis);GO:0043204(perikaryon);GO:0060828(regulation of canonical Wnt signaling pathway);GO:0050808(synapse organization);GO:0008013(beta-catenin binding);GO:0098609(cell-cell adhesion);GO:0098609(cell-cell adhesion)	NA	NA	NA	catenin delta 2 [Source:HGNC Symbol;Acc:HGNC:2516]	8.61272	7.00696	9.19795	6.29236	7.15136	1.88381	2.1711	1.65969	0.30921	0.3703	0.227857	0.195189	0.0480334	0.143174	0.045725	0.062641	0.119942
ENSGALG00000009612		ENSGALT00000031945	GO:0097191(extrinsic apoptotic signaling pathway);GO:0060389(pathway-restricted SMAD protein phosphorylation);GO:0060317(cardiac epithelial to mesenchymal transition);GO:0060038(cardiac muscle cell proliferation);GO:0051891(positive regulation of cardioblast differentiation);GO:0051795(positive regulation of timing of catagen);GO:0050714(positive regulation of protein secretion);GO:0050680(negati…	04010(MAPK signaling pathway);04350(TGF-beta signaling pathway);04068(FoxO signaling pathway);04060(Cytokine-cytokine receptor interaction);04110(Cell cycle);04218(Cellular senescence);04933(AGE-RAGE signaling pathway in diabetic complications)	K13376	NA		91.8023	86.6561	82.9433	46.1635	50.8555	15.9229	20.3029	21.4231	5.97929	3.93166	4.18387	9.12904	6.24985	4.10527	5.92032	4.78897	3.60702
ENSGALG00000033813	BTBD6	ENSGALT00000084535;ENSGALT00000057576;ENSGALT00000072729	NA	NA	NA	NA	BTB domain containing 6 [Source:HGNC Symbol;Acc:HGNC:19897]	56.4784	65.6252	56.129	43.4204	39.7501	15.9572	17.0938	17.2543	3.81029	3.95779	5.10915	6.8911	6.9448	9.1728	4.24272	4.79205	6.7027
ENSGALG00000005426	FREM1	ENSGALT00000008716;ENSGALT00000070266	GO:0005604(basement membrane);GO:0097094(craniofacial suture morphogenesis);GO:0007160(cell-matrix adhesion);GO:0007154(cell communication);GO:0016021(integral component of membrane);GO:0016021(integral component of membrane)	NA	NA	NA	FRAS1 related extracellular matrix 1 [Source:HGNC Symbol;Acc:HGNC:23399]	47.4555	52.4048	44.4713	65.6992	66.4159	19.1334	18.5389	21.947	9.65218	5.05363	3.07417	1.96557	2.01989	1.38097	1.66683	1.97237	1.06425
ENSGALG00000037726	MARCKS	ENSGALT00000047609	GO:0005925(focal adhesion);GO:0005737(cytoplasm);GO:0070062(extracellular exosome);GO:0016020(membrane);GO:0042802(identical protein binding);GO:0005813(centrosome);GO:0051260(protein homooligomerization);GO:0005938(cell cortex);GO:0005080(protein kinase C binding);GO:0005516(calmodulin binding);GO:0051015(actin filament binding);GO:0051017(actin filament bundle assembly);GO:0051764(actin crossli…	NA	NA	NA	myristoylated alanine rich protein kinase C substrate [Source:HGNC Symbol;Acc:HGNC:6759]	144.463	148.637	167.285	119.266	98.5532	30.5654	48.1226	27.97	11.5879	7.30543	9.98934	11.359	11.8959	16.544	5.94567	10.768	6.95318
ENSGALG00000015556	AFAP1	ENSGALT00000025080;ENSGALT00000052132;ENSGALT00000037240;ENSGALT00000037241	GO:0005925(focal adhesion);GO:0015629(actin cytoskeleton);GO:0005829(cytosol);GO:0051493(regulation of cytoskeleton organization);GO:0009966(regulation of signal transduction);GO:0009966(regulation of signal transduction)	NA	NA	NA	actin filament associated protein 1 [Source:HGNC Symbol;Acc:HGNC:24017]	82.6515	66.4659	68.0601	36.232	34.4522	19.8526	16.4627	22.1133	9.52364	7.40155	6.17274	5.35681	4.17727	4.20779	3.45883	5.48429	2.86952
ENSGALG00000037164	ZFHX4	ENSGALT00000068709	NA	NA	NA	NA	zinc finger homeobox 4 [Source:HGNC Symbol;Acc:HGNC:30939]	50.4638	35.8622	39.9354	23.4172	24.9458	13.0701	13.7162	14.6128	5.19796	4.22635	3.45324	4.96739	3.75399	3.30855	2.84299	3.17046	2.13849
ENSGALG00000014686	FBN2	ENSGALT00000057917;ENSGALT00000083096;ENSGALT00000023666	GO:0090287(regulation of cellular response to growth factor stimulus);GO:0005201(extracellular matrix structural constituent);GO:0031012(extracellular matrix);GO:0005578(proteinaceous extracellular matrix);GO:0009653(anatomical structure morphogenesis);GO:0005737(cytoplasm);GO:0005509(calcium ion binding);GO:0005576(extracellular region);GO:0035108(limb morphogenesis);GO:0045669(positive regulati…	NA	NA	NA	fibrillin 2 [Source:HGNC Symbol;Acc:HGNC:3604]	36.7352	31.8452	36.2864	32.3173	34.703	45.8416	16.4397	23.3296	2.82561	1.82581	2.76106	1.12946	0.840666	1.76505	0.142348	0.322895	0.423468
ENSGALG00000031427	FMN2	ENSGALT00000049552	GO:0042177(negative regulation of protein catabolic process);GO:0005938(cell cortex);GO:0016192(vesicle-mediated transport);GO:0043066(negative regulation of apoptotic process);GO:0005730(nucleolus);GO:0030659(cytoplasmic vesicle membrane);GO:0006974(cellular response to DNA damage stimulus);GO:0003779(actin binding);GO:0005829(cytosol);GO:0005783(endoplasmic reticulum);GO:0015629(actin cytoskele…	NA	NA	NA	formin 2 [Source:HGNC Symbol;Acc:HGNC:14074]	8.44311	10.9926	7.66353	2.02792	2.91545	1.47511	0.812139	1.19356	0.186058	0.28106	0.144601	0.278027	0.10868	0.073177	0.050346	0.039983	0.038134
ENSGALG00000036240		ENSGALT00000066530;ENSGALT00000057936	NA	NA	NA	NA		334.734	324.746	330	121.403	116.139	45.3757	38.1404	41.6514	16.4316	10.4564	8.05114	13.644	11.4809	5.20577	10.6176	8.92635	4.36663
ENSGALG00000005266	BEAN1	ENSGALT00000008452	GO:0016021(integral component of membrane);GO:0016020(membrane)	NA	NA	NA	brain expressed associated with NEDD4 1 [Source:HGNC Symbol;Acc:HGNC:24160]	111.715	96.7509	115.909	40.059	41.4436	14.3998	18.6329	22.1225	7.38627	7.71329	8.32887	5.04065	7.59972	8.30113	4.42573	7.08361	4.20171
ENSGALG00000042992		ENSGALT00000082299	NA	NA	NA	NA		39.5769	32.6562	36.6249	8.12477	10.1463	5.91611	3.02538	2.25939	1.09211	0.898878	0.54329	0.487353	0.77219	0.406211	0.255842	0.376316	0.105835
ENSGALG00000023904	FIBIN	ENSGALT00000040200	GO:0005783(endoplasmic reticulum);GO:0042803(protein homodimerization activity);GO:0010042(response to manganese ion);GO:0071548(response to dexamethasone);GO:1904627(response to phorbol 13-acetate 12-myristate)	NA	NA	NA	fin bud initiation factor homolog (zebrafish) [Source:HGNC Symbol;Acc:HGNC:33747]	41.4325	29.4403	32.5145	10.8984	10.7365	3.83867	4.89232	6.77541	1.71474	1.78203	1.44719	1.71274	1.70595	2.20102	0.585745	1.20335	0.616699
ENSGALG00000002124	ZDHHC8	ENSGALT00000003320	GO:0005794(Golgi apparatus);GO:0005739(mitochondrion);GO:1903146(regulation of autophagy of mitochondrion);GO:1903955(positive regulation of protein targeting to mitochondrion);GO:0018345(protein palmitoylation);GO:0007626(locomotory behavior);GO:0016409(palmitoyltransferase activity);GO:0019706(protein-cysteine S-palmitoyltransferase activity);GO:0016746(transferase activity, transferring acyl g…	NA	NA	NA	zinc finger DHHC-type containing 8 [Source:HGNC Symbol;Acc:HGNC:18474]	37.7793	44.4602	40.4578	59.0384	51.5662	21.8246	27.5799	30.1631	6.35651	5.82772	6.9971	5.6829	6.11773	7.43971	5.41237	5.43304	4.65354
ENSGALG00000016837	MYO16	ENSGALT00000027192	GO:0016459(myosin complex);GO:0003774(motor activity);GO:0005524(ATP binding);GO:0000166(nucleotide binding);GO:0014065(phosphatidylinositol 3-kinase signaling);GO:0048812(neuron projection morphogenesis)	NA	NA	NA	myosin XVI [Source:HGNC Symbol;Acc:HGNC:29822]	24.3088	22.017	25.2414	26.8198	24.5871	1.96747	1.55267	1.88647	1.51514	0.767334	1.2056	0.777442	0.111956	0.530405	0.332731	0.232424	0.211418
ENSGALG00000004741	EPHB2	ENSGALT00000007553	GO:0043025(neuronal cell body);GO:0030425(dendrite);GO:0030424(axon);GO:0005887(integral component of plasma membrane);GO:0005886(plasma membrane);GO:0005634(nucleus);GO:0099557(trans-synaptic signaling by trans-synaptic complex, modulating synaptic transmission);GO:0071679(commissural neuron axon guidance);GO:0060997(dendritic spine morphogenesis);GO:0060996(dendritic spine development);GO:00600…	NA	NA	NA	EPH receptor B2 [Source:HGNC Symbol;Acc:HGNC:3393]	75.7464	82.3072	76.5611	43.4639	40.2873	18.9867	26.3213	22.7518	6.99885	4.982	8.53752	6.28852	6.18775	5.8581	2.82307	4.86481	5.75856
ENSGALG00000005263	SOX8	ENSGALT00000008449	GO:0044798(nuclear transcription factor complex);GO:0005737(cytoplasm);GO:0005634(nucleus);GO:0090190(positive regulation of branching involved in ureteric bud morphogenesis);GO:0090184(positive regulation of kidney development);GO:0072289(metanephric nephron tubule formation);GO:0072197(ureter morphogenesis);GO:0072034(renal vesicle induction);GO:0061138(morphogenesis of a branching epithelium);…	NA	NA	NA	SRY-box 8 [Source:HGNC Symbol;Acc:HGNC:11203]	131.627	140.054	127.146	43.2799	49.5837	40.9012	47.5054	47.4818	14.2157	6.72392	10.7922	4.63492	5.53874	5.42788	2.49912	6.60089	4.07628
ENSGALG00000033339	FIGNL2	ENSGALT00000048533	NA	NA	NA	NA	fidgetin like 2 [Source:HGNC Symbol;Acc:HGNC:13287]	23.4603	23.8888	21.598	3.94002	5.90581	1.23763	2.66715	1.51772	0.113181	0.107633	0.21632	0.139851	0.09767	0.444615	0.129957	0.164102	0.050419
ENSGALG00000034967	GDPD5	ENSGALT00000057377;ENSGALT00000083727;ENSGALT00000062021;ENSGALT00000051976	GO:0030424(axon);GO:0016020(membrane);GO:0031175(neuron projection development);GO:0047389(glycerophosphocholine phosphodiesterase activity);GO:0021522(spinal cord motor neuron differentiation);GO:0021895(cerebral cortex neuron differentiation);GO:0045666(positive regulation of neuron differentiation);GO:0045746(negative regulation of Notch signaling pathway);GO:0045787(positive regulation of cel…	NA	NA	NA	glycerophosphodiester phosphodiesterase domain containing 5 [Source:HGNC Symbol;Acc:HGNC:28804]	18.9636	29.9559	17.8722	13.0939	11.4059	4.74278	4.84335	4.78872	1.13229	0.948167	1.56006	1.26157	1.1824	1.71855	1.13071	1.15875	1.87875
ENSGALG00000011298	RARB	ENSGALT00000037748;ENSGALT00000054548;ENSGALT00000049834;ENSGALT00000056656	GO:0005654(nucleoplasm);GO:0005634(nucleus);GO:0071729(beak morphogenesis);GO:0070660(inner ear receptor cell differentiation involved in inner ear sensory epithelium regeneration);GO:0061037(negative regulation of cartilage development);GO:0060348(bone development);GO:0060041(retina development in camera-type eye);GO:0055012(ventricular cardiac muscle cell differentiation);GO:0048384(retinoic ac…	NA	NA	NA	retinoic acid receptor beta [Source:HGNC Symbol;Acc:HGNC:9865]	35.2607	31.7901	33.909	20.911	19.2362	8.66973	8.25865	8.66407	1.99833	1.32816	1.99594	2.16087	1.78587	1.5692	0.77356	1.99977	0.938546
ENSGALG00000029140	CRABP2	ENSGALT00000045442	GO:0001972(retinoic acid binding);GO:0006810(transport);GO:0008289(lipid binding);GO:0005737(cytoplasm);GO:0005634(nucleus);GO:0035115(embryonic forelimb morphogenesis);GO:0042573(retinoic acid metabolic process);GO:0048385(regulation of retinoic acid receptor signaling pathway);GO:0048672(positive regulation of collateral sprouting);GO:0005654(nucleoplasm);GO:0005829(cytosol);GO:0070062(extracel…	NA	NA	NA	cellular retinoic acid binding protein 2 [Source:HGNC Symbol;Acc:HGNC:2339]	122.403	90.6977	81.6401	17.4651	16.3037	1.4933	3.72959	2.51365	0.354773	0.501774	0.708792	0.122633	0.536249	0.058083	0.152278	0.91997	1.07062
ENSGALG00000015058	PTPRD	ENSGALT00000071596;ENSGALT00000024292;ENSGALT00000073391;ENSGALT00000058492;ENSGALT00000052505;ENSGALT00000052792	GO:0070062(extracellular exosome);GO:0004721(phosphoprotein phosphatase activity);GO:0016787(hydrolase activity);GO:0016311(dephosphorylation);GO:0035335(peptidyl-tyrosine dephosphorylation);GO:0006470(protein dephosphorylation);GO:0016791(phosphatase activity);GO:0004725(protein tyrosine phosphatase activity);GO:0016021(integral component of membrane);GO:0016020(membrane);GO:0016020(membrane)	NA	NA	NA	protein tyrosine phosphatase, receptor type D [Source:HGNC Symbol;Acc:HGNC:9668]	31.4573	26.6421	29.0114	15.9733	16.1803	5.93207	4.66732	4.81944	2.71004	1.61534	2.27385	2.87337	1.98125	2.56317	1.67404	2.4789	1.25958
ENSGALG00000036838	PXDNL	ENSGALT00000063785;ENSGALT00000047223	NA	NA	NA	NA	peroxidasin like [Source:HGNC Symbol;Acc:HGNC:26359]	115.608	121.956	118.522	44.7292	43.4628	8.91328	12.8485	9.85315	7.70833	3.442	6.97179	6.35313	6.30799	3.39567	1.09612	3.28132	2.39218
ENSGALG00000040938	nlgn1	ENSGALT00000087214;ENSGALT00000060433;ENSGALT00000047878;ENSGALT00000085099;ENSGALT00000072020	GO:0048488(synaptic vesicle endocytosis);GO:0098793(presynapse);GO:0060076(excitatory synapse);GO:0045202(synapse);GO:0009986(cell surface);GO:0009897(external side of plasma membrane);GO:0005887(integral component of plasma membrane);GO:2000809(positive regulation of synaptic vesicle clustering);GO:2000463(positive regulation of excitatory postsynaptic potential);GO:2000310(regulation of NMDA re…	04514(Cell adhesion molecules (CAMs));04514(Cell adhesion molecules (CAMs))	K07378	NA	neuroligin 1 [Source:HGNC Symbol;Acc:HGNC:14291]	9.77882	12.1171	13.5091	2.28014	2.74833	0.720756	1.61821	2.31241	0.0696926	0.095742	0.181116	0.049928	0.118318	0.15058	0.0152676	0.0632942	0.0460609
ENSGALG00000042427		ENSGALT00000057960	NA	NA	NA	NA		61.7213	70.9747	63.9553	60.2558	60.2769	10.8732	31.5426	33.6695	3.52666	1.91038	3.23162	3.20889	3.93504	2.62987	0.706483	1.31324	1.03915
ENSGALG00000017065	STARD13	ENSGALT00000027566	GO:0008289(lipid binding);GO:0007165(signal transduction);GO:0043542(endothelial cell migration);GO:0090051(negative regulation of cell migration involved in sprouting angiogenesis);GO:0097498(endothelial tube lumen extension)	NA	NA	NA	StAR related lipid transfer domain containing 13 [Source:HGNC Symbol;Acc:HGNC:19164]	82.9738	74.5832	77.0201	41.3291	38.4671	22.8055	21.6331	25.7613	9.6188	8.99879	6.44524	6.86741	6.85163	5.47293	7.59246	8.71556	7.72486
ENSGALG00000011288	DACT2	ENSGALT00000057441;ENSGALT00000018417	GO:0007162(negative regulation of cell adhesion);GO:0008134(transcription factor binding);GO:0005739(mitochondrion);GO:0043588(skin development);GO:0008013(beta-catenin binding);GO:0002244(hematopoietic progenitor cell differentiation);GO:0005080(protein kinase C binding);GO:0051018(protein kinase A binding);GO:0070097(delta-catenin binding);GO:0003382(epithelial cell morphogenesis);GO:0072061(in…	NA	NA	NA	dishevelled binding antagonist of beta catenin 2 [Source:HGNC Symbol;Acc:HGNC:21231]	49.7792	44.0106	47.0971	6.81186	7.92136	4.04221	3.12998	3.94764	1.1411	3.00778	2.48118	1.6815	1.02248	1.52722	0.175118	0.67921	0.588334
ENSGALG00000039452		ENSGALT00000077890	NA	NA	NA	NA		64.0993	60.668	56.386	13.6678	14.0039	4.51422	4.24125	3.92389	2.14448	1.59097	3.14255	2.52846	2.57649	4.16576	3.41165	5.62791	8.25819
ENSGALG00000002286		ENSGALT00000003591;ENSGALT00000042805;ENSGALT00000088027;ENSGALT00000088785;ENSGALT00000088595	GO:0006334(nucleosome assembly);GO:0000786(nucleosome);GO:0046982(protein heterodimerization activity);GO:0005694(chromosome);GO:0005634(nucleus);GO:0003677(DNA binding);GO:0031492(nucleosomal DNA binding);GO:0031492(nucleosomal DNA binding)	NA	NA	NA		305.203	316.045	315.388	256.81	253.759	97.3994	104.06	98.2066	44.0721	36.3629	32.3379	29.8547	26.5816	49.4878	27.1888	28.5555	26.5991
ENSGALG00000030376	DHRS3	ENSGALT00000084796;ENSGALT00000070676;ENSGALT00000067652;ENSGALT00000057161	NA	00830(Retinol metabolism);00830(Retinol metabolism)	K11146	EC:1.1.1.300	dehydrogenase/reductase 3 [Source:HGNC Symbol;Acc:HGNC:17693]	32.5883	36.5326	34.6748	13.5748	12.7361	3.81899	3.87968	3.26964	2.71321	2.0654	2.16209	2.12166	1.55225	2.63296	2.74184	3.23546	1.30769
ENSGALG00000040316	GPC1	ENSGALT00000078804;ENSGALT00000082619	GO:0070062(extracellular exosome);GO:0045121(membrane raft);GO:0005886(plasma membrane);GO:0005829(cytosol);GO:0005654(nucleoplasm);GO:0005578(proteinaceous extracellular matrix);GO:2001016(positive regulation of skeletal muscle cell differentiation);GO:1902726(positive regulation of skeletal muscle satellite cell differentiation);GO:1902725(negative regulation of satellite cell differentiation);…	NA	NA	NA	glypican 1 [Source:HGNC Symbol;Acc:HGNC:4449]	200.237	226.454	212.154	107.111	115.664	53.2173	54.9675	44.1988	20.6129	12.2562	19.2472	14.4441	14.1706	11.599	9.7229	20.3322	15.8243
ENSGALG00000001480	FAM212B	ENSGALT00000002243	NA	NA	NA	NA	family with sequence similarity 212 member B [Source:HGNC Symbol;Acc:HGNC:28045]	47.7248	59.2078	46.6736	53.0814	46.9775	6.39045	8.54201	7.51391	2.09529	1.32337	2.26615	2.13702	1.83483	1.59674	1.15693	4.46803	2.30404
ENSGALG00000016803	ST6GAL2	ENSGALT00000036571	GO:0097503(sialylation);GO:0009311(oligosaccharide metabolic process);GO:0008373(sialyltransferase activity);GO:0003835(beta-galactoside alpha-2,6-sialyltransferase activity);GO:0006486(protein glycosylation);GO:0016757(transferase activity, transferring glycosyl groups);GO:0016740(transferase activity);GO:0016021(integral component of membrane);GO:0016020(membrane)	00510(N-Glycan biosynthesis);00514(Other types of O-glycan biosynthesis)	K00779	EC:2.4.99.1	ST6 beta-galactoside alpha-2,6-sialyltransferase 2 [Source:HGNC Symbol;Acc:HGNC:10861]	33.9446	33.3742	26.1396	2.54142	4.40555	1.37241	1.46075	2.06428	0.860939	0.535054	0.915247	0.358115	0.388949	1.24789	0.657248	0.459679	0.476858
ENSGALG00000011696	JAG2	ENSGALT00000021553;ENSGALT00000078402	GO:0016020(membrane);GO:0005887(integral component of plasma membrane);GO:1990134(epithelial cell apoptotic process involved in palatal shelf morphogenesis);GO:0045747(positive regulation of Notch signaling pathway);GO:0045061(thymic T cell selection);GO:0042492(gamma-delta T cell differentiation);GO:0042127(regulation of cell proliferation);GO:0030217(T cell differentiation);GO:0030155(regulatio…	04330(Notch signaling pathway);04330(Notch signaling pathway)	K21635	NA	jagged 2 [Source:HGNC Symbol;Acc:HGNC:6189]	68.457	80.5783	75.0511	66.2368	70.334	26.8334	27.2814	27.0498	11.5151	9.70994	8.35398	15.4878	16.2421	15.1099	6.99915	8.3263	8.63116
ENSGALG00000005042	IQSEC1	ENSGALT00000008081	GO:0043231(intracellular membrane-bounded organelle);GO:0005730(nucleolus);GO:0030036(actin cytoskeleton organization);GO:0032012(regulation of ARF protein signal transduction);GO:0005086(ARF guanyl-nucleotide exchange factor activity);GO:0043547(positive regulation of GTPase activity)	NA	NA	NA	IQ motif and Sec7 domain 1 [Source:HGNC Symbol;Acc:HGNC:29112]	60.2001	64.7642	68.704	62.4585	60.5872	20.121	25.1801	23.5298	8.68483	7.40441	7.73522	6.7617	7.11367	10.8054	6.45428	7.32722	5.21966
ENSGALG00000039346		ENSGALT00000056371	NA	NA	NA	NA		17.7075	18.2222	22.6977	23.3415	21.2181	5.0167	7.00539	6.47285	2.46946	1.51477	2.1384	1.20155	1.34624	0.957906	0.824078	0.801241	0.81666
ENSGALG00000033966		ENSGALT00000070488;ENSGALT00000050653;ENSGALT00000079936	NA	NA	NA	NA		28.9349	23.9385	26.2025	21.7364	20.4682	3.64559	4.0228	4.24531	3.29432	1.94592	3.44094	4.11752	3.90957	3.0359	1.21003	2.13278	1.87965
ENSGALG00000033510	ERBB3	ENSGALT00000055115;ENSGALT00000080916	GO:0046982(protein heterodimerization activity);GO:0042802(identical protein binding);GO:0007165(signal transduction);GO:0010628(positive regulation of gene expression);GO:0038132(neuregulin binding);GO:0043235(receptor complex);GO:0016324(apical plasma membrane);GO:0016323(basolateral plasma membrane);GO:0016328(lateral plasma membrane);GO:0005615(extracellular space);GO:0019838(growth factor bi…	04012(ErbB signaling pathway);04020(Calcium signaling pathway);04020(Calcium signaling pathway)	K05084	EC:2.7.10.1	erb-b2 receptor tyrosine kinase 3 [Source:HGNC Symbol;Acc:HGNC:3431]	12.6124	14.8989	14.0931	11.3334	13.069	4.69292	5.6918	6.10455	0.171549	0.377874	0.641806	0.141145	0.144708	0.219999	0.0499537	0.189648	0.230976
ENSGALG00000038504	MID1	ENSGALT00000065715	GO:0046982(protein heterodimerization activity);GO:0042802(identical protein binding);GO:0008017(microtubule binding);GO:0042803(protein homodimerization activity);GO:0005874(microtubule);GO:0035372(protein localization to microtubule);GO:0005737(cytoplasm);GO:0031625(ubiquitin protein ligase binding);GO:0005881(cytoplasmic microtubule);GO:0015630(microtubule cytoskeleton);GO:0051219(phosphoprote…	04120(Ubiquitin mediated proteolysis)	K08285	EC:2.3.2.27	midline 1 (Opitz/BBB syndrome) [Source:RefSeq peptide;Acc:NP_989460]	33.8585	35.9145	34.9309	11.6434	10.5238	4.0688	3.91583	4.47742	2.67571	2.28645	2.63255	3.55101	3.044	3.65439	2.01308	3.71065	2.5544
ENSGALG00000023793		ENSGALT00000039855	NA	NA	NA	NA		43.5049	30.9209	44.8602	5.69829	6.15903	3.02715	3.05924	3.53294	1.93468	1.82798	1.774	2.1493	2.30614	1.61043	2.33314	2.12861	1.46924
ENSGALG00000007804	GXYLT2	ENSGALT00000012660	GO:0016266(O-glycan processing);GO:0035252(UDP-xylosyltransferase activity);GO:0016757(transferase activity, transferring glycosyl groups);GO:0016740(transferase activity)	00514(Other types of O-glycan biosynthesis)	K13676	EC:2.4.2.-	glucoside xylosyltransferase 2 [Source:HGNC Symbol;Acc:HGNC:33383]	133.452	135.231	113.606	84.9023	75.0484	47.6356	39.6419	48.7883	14.4062	12.2323	12.9984	14.3516	13.4448	11.2723	6.75636	11.8361	6.24332
ENSGALG00000009381		ENSGALT00000015283	GO:0051056(regulation of small GTPase mediated signal transduction);GO:0048814(regulation of dendrite morphogenesis);GO:0043087(regulation of GTPase activity);GO:0031532(actin cytoskeleton reorganization);GO:0005096(GTPase activator activity);GO:0043547(positive regulation of GTPase activity)	NA	NA	NA		47.6785	47.5979	50.0991	54.3238	48.7532	23.9948	20.801	21.6765	7.07116	6.53183	6.10747	6.56462	4.68924	7.0093	6.75107	4.26577	4.31461
ENSGALG00000011238	WLS	ENSGALT00000018328;ENSGALT00000058802	GO:0031410(cytoplasmic vesicle);GO:0005886(plasma membrane);GO:0005802(trans-Golgi network);GO:0005794(Golgi apparatus);GO:0005783(endoplasmic reticulum);GO:0005769(early endosome);GO:0090263(positive regulation of canonical Wnt signaling pathway);GO:0061357(positive regulation of Wnt protein secretion);GO:0061355(Wnt protein secretion);GO:0031017(exocrine pancreas development);GO:0030902(hindbra…	NA	NA	NA	wntless Wnt ligand secretion mediator [Source:HGNC Symbol;Acc:HGNC:30238]	100.102	109.464	93.0356	44.8725	51.8341	20.2429	17.1892	20.3736	8.8992	8.01668	9.14908	10.4487	6.28717	14.5574	6.81942	7.99922	7.86247
ENSGALG00000030455	JAZF1	ENSGALT00000064064	NA	NA	NA	NA	JAZF zinc finger 1 [Source:HGNC Symbol;Acc:HGNC:28917]	17.7568	16.1646	15.3858	15.3499	13.9299	4.30379	4.93121	4.93017	1.59651	1.32032	1.55057	1.43367	1.6465	1.77745	1.20498	1.73464	1.45288
ENSGALG00000033405	DBN1	ENSGALT00000078180;ENSGALT00000062237	GO:0045296(cadherin binding);GO:0030426(growth cone);GO:0016020(membrane);GO:0005886(plasma membrane);GO:0015629(actin cytoskeleton);GO:0005911(cell-cell junction);GO:0007015(actin filament organization);GO:0005921(gap junction);GO:0010643(cell communication by chemical coupling);GO:0010644(cell communication by electrical coupling);GO:0032507(maintenance of protein location in cell);GO:0048699(g…	NA	NA	NA	drebrin 1 [Source:HGNC Symbol;Acc:HGNC:2695]	44.6739	52.5949	55.6799	8.13878	11.0008	3.69736	5.10739	3.44905	1.30877	0.919156	1.21769	1.35322	0.932633	1.52323	0.4912	0.742126	2.15577
ENSGALG00000004653		ENSGALT00000007414;ENSGALT00000090215;ENSGALT00000085306	GO:0032420(stereocilium);GO:0060122(inner ear receptor stereocilium organization);GO:0007626(locomotory behavior);GO:0005886(plasma membrane);GO:0007156(homophilic cell adhesion via plasma membrane adhesion molecules);GO:0007605(sensory perception of sound);GO:0007155(cell adhesion);GO:0005509(calcium ion binding);GO:0016021(integral component of membrane);GO:0016020(membrane);GO:0016020(membrane)	NA	NA	NA		34.166	32.4248	29.3991	6.2506	7.46141	3.23829	5.4541	3.90568	2.79423	2.32021	2.25533	1.68434	2.49115	1.25404	1.47225	1.5997	0.789282
ENSGALG00000012265	MICALL1	ENSGALT00000020035;ENSGALT00000020033	GO:0055038(recycling endosome membrane);GO:0019898(extrinsic component of membrane);GO:0005770(late endosome);GO:1990126(retrograde transport, endosome to plasma membrane);GO:0097320(plasma membrane tubulation);GO:0036010(protein localization to endosome);GO:0032458(slow endocytic recycling);GO:0031175(neuron projection development);GO:0006898(receptor-mediated endocytosis);GO:0006897(endocytosis…	NA	NA	NA	MICAL like 1 [Source:HGNC Symbol;Acc:HGNC:29804]	102.891	144.611	108.772	63.4205	61.0402	18.4852	18.1136	18.8044	16.2112	15.3417	14.1141	14.0001	12.6294	18.2593	16.174	15.8186	15.9062
ENSGALG00000037203	CTNNB1	ENSGALT00000063944;ENSGALT00000089987;ENSGALT00000062180;ENSGALT00000090089;ENSGALT00000089299;ENSGALT00000087992	NA	04310(Wnt signaling pathway);04510(Focal adhesion);04520(Adherens junction);04916(Melanogenesis);04916(Melanogenesis)	K02105	NA	catenin beta 1 [Source:HGNC Symbol;Acc:HGNC:2514]	198.291	201.611	201.956	130.85	127.831	60.2182	57.4767	59.3419	29.6672	26.884	26.9886	26.702	24.9047	33.6437	26.4118	24.7591	26.4141
ENSGALG00000010255		ENSGALT00000016679;ENSGALT00000055820	NA	NA	NA	NA		19.2967	21.0181	21.7379	5.63335	4.44899	3.74793	3.95234	3.16928	1.65129	1.17008	1.06262	1.09273	0.852517	1.41262	1.36875	0.754592	1.02273
ENSGALG00000033009		ENSGALT00000068195	NA	NA	NA	NA		51.2508	48.6975	48.7574	36.8686	33.9886	16.6225	13.908	17.718	4.43018	5.04847	3.61208	2.42716	2.14408	2.98912	2.13149	2.5938	4.13323
ENSGALG00000027757	ARL4A	ENSGALT00000043011	GO:0007264(small GTPase mediated signal transduction);GO:0005525(GTP binding);GO:0005622(intracellular);GO:0000166(nucleotide binding);GO:0005634(nucleus);GO:0005654(nucleoplasm);GO:0005730(nucleolus);GO:0005829(cytosol);GO:0005886(plasma membrane)	NA	NA	NA	ADP ribosylation factor like GTPase 4A [Source:HGNC Symbol;Acc:HGNC:695]	141.341	214.533	192.947	37.5185	32.8481	27.1352	17.1262	16.4953	9.45163	11.4386	9.21235	5.43037	4.54556	11.0065	12.1538	8.8791	11.0455
ENSGALG00000032326		ENSGALT00000075470	NA	NA	NA	NA		92.4342	83.0728	110.54	30.6895	32.9502	29.3751	22.8223	32.8174	11.6036	5.621	7.02807	3.24329	4.78302	3.74671	2.11226	3.89372	2.84363
ENSGALG00000036043	TBX3	ENSGALT00000090311;ENSGALT00000047256	NA	NA	NA	NA	T-box 3 [Source:HGNC Symbol;Acc:HGNC:11602]	44.4129	45.0519	40.5342	60.4637	56.7023	24.3523	36.3649	21.8806	8.20873	8.05926	8.97327	7.4977	6.06909	6.67001	2.59639	4.16613	3.0814
ENSGALG00000007912	ATP9A	ENSGALT00000012849	GO:0055037(recycling endosome);GO:0048471(perinuclear region of cytoplasm);GO:0005802(trans-Golgi network);GO:0005769(early endosome);GO:0005768(endosome);GO:0006890(retrograde vesicle-mediated transport, Golgi to ER);GO:0045332(phospholipid translocation);GO:0015914(phospholipid transport);GO:0004012(phospholipid-translocating ATPase activity);GO:0000287(magnesium ion binding);GO:0006897(endocyt…	NA	NA	NA	ATPase phospholipid transporting 9A (putative) [Source:HGNC Symbol;Acc:HGNC:13540]	9.20693	7.22984	8.94618	17.1283	14.5532	3.50557	4.48708	3.84838	1.01243	0.632505	0.931246	0.75822	0.570791	1.02455	0.878718	0.758096	0.836728
ENSGALG00000028565	PCDHGC3	ENSGALT00000078457;ENSGALT00000045562;ENSGALT00000080490;ENSGALT00000065328;ENSGALT00000076739	GO:0007155(cell adhesion);GO:0007399(nervous system development);GO:0005886(plasma membrane);GO:0007156(homophilic cell adhesion via plasma membrane adhesion molecules);GO:0007267(cell-cell signaling);GO:0005887(integral component of plasma membrane);GO:0005509(calcium ion binding);GO:0016021(integral component of membrane);GO:0016020(membrane);GO:0070062(extracellular exosome);GO:0050808(synapse…	NA	NA	NA	protocadherin gamma subfamily C, 3 [Source:HGNC Symbol;Acc:HGNC:8716]	72.4942	72.6774	72.8461	41.4384	38.4112	29.8393	35.6851	27.2993	6.51515	5.27714	7.90343	5.76211	5.47377	7.55833	4.38825	5.86091	8.32333
ENSGALG00000043587	CCDC88A	ENSGALT00000071158;ENSGALT00000082645;ENSGALT00000077189;ENSGALT00000059076	GO:0016477(cell migration);GO:0032956(regulation of actin cytoskeleton organization);GO:0010975(regulation of neuron projection development);GO:0030032(lamellipodium assembly);GO:0008017(microtubule binding);GO:0030027(lamellipodium);GO:0035091(phosphatidylinositol binding);GO:0042803(protein homodimerization activity);GO:0036064(ciliary basal body);GO:0005814(centriole);GO:0031929(TOR signaling)…	NA	NA	NA	coiled-coil domain containing 88A [Source:HGNC Symbol;Acc:HGNC:25523]	22.2876	20.2106	26.1456	11.1305	10.682	5.26597	4.52023	5.83834	1.53841	1.18946	0.759424	2.00368	1.26765	1.96736	1.62687	1.29308	0.807929
ENSGALG00000037889	PTPRT	ENSGALT00000068172	GO:0008013(beta-catenin binding);GO:0045294(alpha-catenin binding);GO:0045296(cadherin binding);GO:0006470(protein dephosphorylation);GO:0004725(protein tyrosine phosphatase activity);GO:0016790(thiolester hydrolase activity);GO:0045295(gamma-catenin binding);GO:0051393(alpha-actinin binding);GO:0070097(delta-catenin binding)	NA	NA	NA	protein tyrosine phosphatase, receptor type T [Source:HGNC Symbol;Acc:HGNC:9682]	59.2261	61.9086	57.6096	67.3803	82.2632	12.9673	13.2757	8.78642	3.03115	2.53374	0.738583	0.508053	1.05782	2.231	0.285518	0.485762	0.583439
ENSGALG00000043283	LGI2	ENSGALT00000071435	NA	NA	NA	NA	leucine-rich repeat LGI family member 2 precursor [Source:RefSeq peptide;Acc:NP_001244245]	7.73506	5.01411	7.75627	3.52194	4.19756	1.59633	1.0176	0.977649	0.199795	0.099056	0.236418	0.131095	0.055005	0.122029	0.177545	0.260804	0.130547
ENSGALG00000021128	FSCN1	ENSGALT00000034001;ENSGALT00000072154	GO:0071437(invadopodium);GO:0070062(extracellular exosome);GO:0044393(microspike);GO:0043209(myelin sheath);GO:0031253(cell projection membrane);GO:0030426(growth cone);GO:0030175(filopodium);GO:0030027(lamellipodium);GO:0015629(actin cytoskeleton);GO:0005911(cell-cell junction);GO:0005902(microvillus);GO:0005856(cytoskeleton);GO:0005829(cytosol);GO:0005737(cytoplasm);GO:0002102(podosome);GO:0001…	NA	NA	NA	fascin actin-bundling protein 1 [Source:HGNC Symbol;Acc:HGNC:11148]	249.43	201.305	234.487	49.8845	55.5541	13.8524	17.8347	15.1548	5.26658	2.10926	5.00053	4.95287	4.96086	10.6033	1.62372	4.5009	7.38702
ENSGALG00000004345	OIT3	ENSGALT00000053023;ENSGALT00000074731;ENSGALT00000006932	GO:1903118(urate homeostasis);GO:0005509(calcium ion binding);GO:0005509(calcium ion binding)	NA	NA	NA	oncoprotein induced transcript 3 [Source:HGNC Symbol;Acc:HGNC:29953]	34.8979	32.3089	38.3094	76.8831	76.6349	23.407	33.4879	40.9379	9.52997	7.29933	8.47384	7.60602	5.28877	4.71964	4.71093	4.87643	4.15809
ENSGALG00000036471	RFTN2	ENSGALT00000085684;ENSGALT00000080890	GO:0033227(dsRNA transport);GO:0043330(response to exogenous dsRNA);GO:0043330(response to exogenous dsRNA)	NA	NA	NA	raftlin family member 2 [Source:HGNC Symbol;Acc:HGNC:26402]	62.1007	64.5061	65.9343	75.5078	67.4668	21.6866	16.6304	29.6126	9.27831	7.05712	6.44443	5.63661	5.11658	7.07589	4.26344	4.75278	2.10584
ENSGALG00000026531		ENSGALT00000045313	GO:0005975(carbohydrate metabolic process);GO:0016051(carbohydrate biosynthetic process);GO:0008146(sulfotransferase activity);GO:0005794(Golgi apparatus);GO:0000139(Golgi membrane);GO:0016740(transferase activity);GO:0016021(integral component of membrane)	NA	NA	NA		84.5548	69.2617	79.6578	18.6392	23.9984	15.3906	19.9458	14.636	7.79911	6.53388	7.11489	4.88632	7.90858	7.1945	8.66815	8.18584	8.2685
ENSGALG00000007582	DPYSL3	ENSGALT00000012260;ENSGALT00000063194	GO:0048678(response to axon injury);GO:0051491(positive regulation of filopodium assembly);GO:0010975(regulation of neuron projection development);GO:0051017(actin filament bundle assembly);GO:0016810(hydrolase activity, acting on carbon-nitrogen (but not peptide) bonds);GO:0030334(regulation of cell migration);GO:0016787(hydrolase activity);GO:0005737(cytoplasm);GO:0031005(filamin binding);GO:00…	NA	NA	NA	dihydropyrimidinase like 3 [Source:HGNC Symbol;Acc:HGNC:3015]	73.0713	69.0887	70.3256	21.1948	19.1314	7.96643	10.5177	7.09471	2.90782	2.27396	4.81748	5.15159	4.54637	8.46877	2.60927	4.49243	4.43447
ENSGALG00000043511	ARHGAP32	ENSGALT00000060464	GO:0005654(nucleoplasm);GO:0005794(Golgi apparatus);GO:0001650(fibrillar center);GO:0015629(actin cytoskeleton);GO:0005938(cell cortex)	NA	NA	NA	Rho GTPase activating protein 32 [Source:HGNC Symbol;Acc:HGNC:17399]	28.6698	31.4622	31.7399	10.9418	10.7559	6.2222	3.98955	3.16579	1.62917	0.773517	1.4011	1.01908	0.747579	1.7827	1.00756	0.771878	1.47323
ENSGALG00000044296		ENSGALT00000083995	NA	NA	NA	NA		114.874	94.8263	121.042	54.8045	60.7347	39.8617	43.0497	42.2257	9.29132	8.67519	9.35306	11.1307	10.4571	15.1542	9.75002	9.65738	9.69199
ENSGALG00000001956	OLFML3	ENSGALT00000084492;ENSGALT00000003025;ENSGALT00000066230;ENSGALT00000083251;ENSGALT00000083345	GO:1903561(extracellular vesicle);GO:0007275(multicellular organism development);GO:0005576(extracellular region);GO:0005576(extracellular region)	NA	NA	NA	olfactomedin like 3 [Source:HGNC Symbol;Acc:HGNC:24956]	93.1093	71.2242	90.3703	54.6325	60.161	36.4553	37.7961	39.2184	7.21302	6.07187	9.37474	6.90483	5.72966	7.77036	2.7753	6.66856	5.04914
ENSGALG00000039173	RGMA	ENSGALT00000077053;ENSGALT00000067565	GO:0030509(BMP signaling pathway);GO:0001843(neural tube closure);GO:0005102(receptor binding);GO:0009986(cell surface);GO:0031175(neuron projection development);GO:0043547(positive regulation of GTPase activity);GO:0010977(negative regulation of neuron projection development);GO:0015026(coreceptor activity);GO:0030510(regulation of BMP signaling pathway);GO:0051044(positive regulation of membran…	NA	NA	NA	repulsive guidance molecule family member a [Source:HGNC Symbol;Acc:HGNC:30308]	138.69	131.816	123.3	72.8735	69.6928	43.8648	42.1853	55.1929	12.1608	8.94564	13.343	11.097	13.6279	14.2847	10.9206	10.2825	17.7948
ENSGALG00000010722		ENSGALT00000017449;ENSGALT00000051912	NA	NA	NA	NA		20.2951	17.5093	19.4188	13.6556	23.4612	4.13275	7.12735	3.59553	0.913839	0.628121	0.459796	0.516696	0.248159	0.152464	0.182463	0.274951	0.110533
ENSGALG00000036497	SOX4	ENSGALT00000079692	GO:0042593(glucose homeostasis);GO:0060548(negative regulation of cell death);GO:0005634(nucleus);GO:0048485(sympathetic nervous system development);GO:0045893(positive regulation of transcription, DNA-templated);GO:0008284(positive regulation of cell proliferation);GO:0008285(negative regulation of cell proliferation);GO:0003700(transcription factor activity, sequence-specific DNA binding);GO:00…	NA	NA	NA	SRY-box 4 [Source:HGNC Symbol;Acc:HGNC:11200]	47.3646	48.1542	47.007	18.5933	14.7599	9.123	14.6702	7.53513	2.97133	2.44292	2.96913	3.22764	2.65236	3.65874	2.96263	3.76484	4.63401
ENSGALG00000003567	FNDC5	ENSGALT00000005650	GO:0005886(plasma membrane);GO:0005783(endoplasmic reticulum);GO:0005576(extracellular region);GO:0090336(positive regulation of brown fat cell differentiation);GO:0014850(response to muscle activity);GO:0016021(integral component of membrane);GO:0016020(membrane)	NA	NA	NA	fibronectin type III domain containing 5 [Source:HGNC Symbol;Acc:HGNC:20240]	68.4292	91.2626	59.6761	48.1369	56.2484	27.6896	26.4985	14.9429	3.87341	4.1735	3.51361	2.58411	1.21377	3.81286	1.40775	2.63234	2.02409
ENSGALG00000006097	PLXNA1	ENSGALT00000036246	GO:0070062(extracellular exosome);GO:0016020(membrane);GO:1990138(neuron projection extension);GO:0097485(neuron projection guidance);GO:0060666(dichotomous subdivision of terminal units involved in salivary gland branching);GO:0048841(regulation of axon extension involved in axon guidance);GO:0021785(branchiomotor neuron axon guidance);GO:0014910(regulation of smooth muscle cell migration);GO:00…	NA	NA	NA	plexin A1 [Source:HGNC Symbol;Acc:HGNC:9099]	208.707	204.921	199.035	89.8662	95.144	42.9841	51.0688	45.3095	23.5962	18.2674	22.5445	26.6097	17.7763	30.9673	22.8507	20.9028	22.6946
ENSGALG00000009241	SFRP2	ENSGALT00000015038	GO:0005615(extracellular space);GO:2000041(negative regulation of planar cell polarity pathway involved in axis elongation);GO:2000035(regulation of stem cell division);GO:1904956(regulation of midbrain dopaminergic neuron differentiation);GO:1902042(negative regulation of extrinsic apoptotic signaling pathway via death domain receptors);GO:0090263(positive regulation of canonical Wnt signaling p…	04310(Wnt signaling pathway)	K02176	NA	secreted frizzled related protein 2 [Source:HGNC Symbol;Acc:HGNC:10777]	175.208	137.658	183.656	62.1538	64.4323	8.60267	14.6021	12.4176	2.78557	2.57516	3.70823	7.71192	8.17952	5.02833	0.641527	3.96282	1.11393
ENSGALG00000027091		ENSGALT00000045305	GO:0004930(G-protein coupled receptor activity);GO:0005886(plasma membrane);GO:0007186(G-protein coupled receptor signaling pathway);GO:0016021(integral component of membrane);GO:0016020(membrane)	NA	NA	NA		25.2886	22.9514	29.8564	13.137	9.22661	3.43074	2.55995	3.19147	0.935653	0.516135	1.17542	0.79088	1.18317	1.20169	0.793417	1.17118	1.13923
ENSGALG00000033470	ADGRA3	ENSGALT00000080039	NA	NA	NA	NA	adhesion G protein-coupled receptor A3 [Source:HGNC Symbol;Acc:HGNC:13839]	24.596	23.2584	26.1523	14.6732	17.3287	4.46026	3.988	5.44131	2.34516	1.94267	2.43572	2.17384	2.4792	3.6947	2.42962	1.56562	1.90191
ENSGALG00000027355	TPBG	ENSGALT00000043299	GO:0016021(integral component of membrane);GO:0016020(membrane);GO:0051965(positive regulation of synapse assembly);GO:0005737(cytoplasm);GO:0005783(endoplasmic reticulum);GO:0009986(cell surface)	NA	NA	NA	trophoblast glycoprotein [Source:HGNC Symbol;Acc:HGNC:12004]	22.0316	20.6929	15.4835	14.9751	9.82923	3.73578	3.2903	4.23738	0.097912	0.428793	0.293198	0.317569	0.272445	0.417002	0.329035	0.161646	0.082447
ENSGALG00000007483	LRIG1	ENSGALT00000036226	GO:0060384(innervation);GO:0032474(otolith morphogenesis);GO:0007605(sensory perception of sound);GO:0016021(integral component of membrane);GO:0016020(membrane)	NA	NA	NA	leucine rich repeats and immunoglobulin like domains 1 [Source:HGNC Symbol;Acc:HGNC:17360]	206.515	181.128	187.537	127.043	120.903	62.7753	74.0364	60.314	30.647	28.1709	33.4027	20.8508	26.0271	26.4061	15.041	21.389	21.5593
ENSGALG00000007555	CCND1	ENSGALT00000084122;ENSGALT00000050052;ENSGALT00000088287;ENSGALT00000012217	GO:0017053(transcriptional repressor complex);GO:0005923(bicellular tight junction);GO:0005737(cytoplasm);GO:0005654(nucleoplasm);GO:0005634(nucleus);GO:0005622(intracellular);GO:0000307(cyclin-dependent protein kinase holoenzyme complex);GO:2000045(regulation of G1/S transition of mitotic cell cycle);GO:0097421(liver regeneration);GO:0071310(cellular response to organic substance);GO:0071157(neg…	04310(Wnt signaling pathway);04340(Hedgehog signaling pathway);04371(Apelin signaling pathway);04068(FoxO signaling pathway);04110(Cell cycle);04115(p53 signaling pathway);04218(Cellular senescence);04510(Focal adhesion);04530(Tight junction);04933(AGE-RAGE signaling pathway in diabetic complications);04933(AGE-RAGE signaling pathway in diabetic complications)	K04503	NA	cyclin D1 [Source:HGNC Symbol;Acc:HGNC:1582]	92.7908	86.1369	84.8844	55.4996	52.3742	41.7281	40.669	36.943	13.3197	6.4189	7.96148	7.95313	8.92307	11.7071	6.88673	6.62718	6.75553
ENSGALG00000040229		ENSGALT00000082832	NA	NA	NA	NA		51.7128	49.6293	49.7698	39.5769	29.3072	5.95858	7.21013	6.0152	5.0001	5.49914	2.20855	2.86455	2.13178	1.61654	2.04952	1.98784	1.6396
ENSGALG00000008763	SSX2IP	ENSGALT00000014255	GO:0043234(protein complex);GO:0036064(ciliary basal body);GO:0034451(centriolar satellite);GO:0031252(cell leading edge);GO:2000145(regulation of cell motility);GO:0060271(cilium assembly);GO:0035735(intraciliary transport involved in cilium assembly);GO:0035020(regulation of Rac protein signal transduction);GO:0007098(centrosome cycle)	04520(Adherens junction)	K06085	NA	SSX family member 2 interacting protein [Source:HGNC Symbol;Acc:HGNC:16509]	15.0255	15.1324	14.879	2.35801	2.57643	0.422889	0.074994	0.194537	0.064527	0.019019	0.047484	0.049266	0.025004	0.137424	0.021418	0.063877	0
ENSGALG00000046283		ENSGALT00000073208	NA	NA	NA	NA		39.6127	29.2817	47.4799	14.0566	12.7491	3.28217	3.92899	4.75521	0.599706	0.856092	1.1589	2.6369	0.724578	1.68482	0.942508	1.14525	1.37319
ENSGALG00000002182	NR5A2	ENSGALT00000003418;ENSGALT00000053416	GO:0090575(RNA polymerase II transcription factor complex);GO:0005737(cytoplasm);GO:0005634(nucleus);GO:0061113(pancreas morphogenesis);GO:0045944(positive regulation of transcription from RNA polymerase II promoter);GO:0045893(positive regulation of transcription, DNA-templated);GO:0045070(positive regulation of viral genome replication);GO:0042632(cholesterol homeostasis);GO:0042127(regulation …	NA	NA	NA	nuclear receptor subfamily 5 group A member 2 [Source:HGNC Symbol;Acc:HGNC:7984]	8.39935	7.54391	6.85993	4.75475	4.25791	3.01558	2.0446	1.35311	0.387653	0.204432	0.171339	0.185449	0.142925	0.250547	0.262382	0.30867	0.26421
ENSGALG00000008537	EPHB3	ENSGALT00000039784;ENSGALT00000078193	GO:0016477(cell migration);GO:0043087(regulation of GTPase activity);GO:0060021(palate development);GO:0048013(ephrin receptor signaling pathway);GO:0022407(regulation of cell-cell adhesion);GO:0005887(integral component of plasma membrane);GO:0046777(protein autophosphorylation);GO:0001525(angiogenesis);GO:0060997(dendritic spine morphogenesis);GO:0034446(substrate adhesion-dependent cell spread…	NA	NA	NA	EPH receptor B3 [Source:HGNC Symbol;Acc:HGNC:3394]	36.1912	35.2533	34.7594	27.4389	27.9442	6.16864	8.17036	7.60537	2.32176	1.91665	3.25654	3.01133	2.17163	4.64548	1.42027	1.91517	2.74219
ENSGALG00000001774	NEO1	ENSGALT00000048664;ENSGALT00000034761	GO:0055072(iron ion homeostasis);GO:0030513(positive regulation of BMP signaling pathway);GO:0004872(receptor activity);GO:0007411(axon guidance);GO:0007399(nervous system development);GO:0005887(integral component of plasma membrane);GO:0016021(integral component of membrane);GO:0016020(membrane);GO:0005654(nucleoplasm);GO:0005886(plasma membrane);GO:0005794(Golgi apparatus);GO:0039706(co-recept…	04514(Cell adhesion molecules (CAMs));04514(Cell adhesion molecules (CAMs))	K06766	NA	neogenin 1 [Source:HGNC Symbol;Acc:HGNC:7754]	76.491	75.7244	72.1841	70.8135	71.02	36.9909	41.8528	40.2307	13.7196	12.8304	13.5064	11.489	12.9884	11.7769	13.5714	14.9068	14.8188
ENSGALG00000015055	SLC22A16	ENSGALT00000024279;ENSGALT00000083051;ENSGALT00000046587	GO:0016021(integral component of membrane);GO:1902603(carnitine transmembrane transport);GO:0046717(acid secretion);GO:0030317(flagellated sperm motility);GO:0015837(amine transport);GO:0015879(carnitine transport);GO:0015695(organic cation transport);GO:0007338(single fertilization);GO:0015226(carnitine transmembrane transporter activity);GO:0015101(organic cation transmembrane transporter activ…	NA	NA	NA	solute carrier family 22 member 16 [Source:HGNC Symbol;Acc:HGNC:20302]	30.1987	24.6389	27.5511	56.5212	60.2285	8.82457	9.57477	8.6756	7.07468	4.72475	4.77044	4.17682	5.59338	5.17431	2.22023	2.93747	1.20489
ENSGALG00000038885	FEZ1	ENSGALT00000083290;ENSGALT00000057209;ENSGALT00000087054	GO:1902902(negative regulation of autophagosome assembly);GO:0005794(Golgi apparatus);GO:0005737(cytoplasm);GO:0005813(centrosome);GO:0043015(gamma-tubulin binding);GO:0043015(gamma-tubulin binding)	NA	NA	NA	fasciculation and elongation protein zeta 1 [Source:HGNC Symbol;Acc:HGNC:3659]	27.8737	30.8802	27.8971	12.1919	10.9299	4.02423	7.10083	5.0087	1.10765	0.624918	1.09838	1.10301	1.7241	1.9681	0.788419	1.09837	0.4135
ENSGALG00000039595	BTBD11	ENSGALT00000060692;ENSGALT00000082819	GO:0060395(SMAD protein signal transduction);GO:0060395(SMAD protein signal transduction)	NA	NA	NA	BTB domain containing 11 [Source:HGNC Symbol;Acc:HGNC:23844]	88.5172	101.783	93.2096	59.8233	48.0179	27.6615	13.7181	28.2862	1.31533	0.870814	0.928648	1.05544	1.10232	5.51389	1.28888	1.30789	1.32994
ENSGALG00000005774	NKAIN4	ENSGALT00000033989;ENSGALT00000055333;ENSGALT00000066184	GO:0002028(regulation of sodium ion transport);GO:0016021(integral component of membrane);GO:0016020(membrane);GO:0016020(membrane)	NA	NA	NA	sodium/potassium transporting ATPase interacting 4 [Source:HGNC Symbol;Acc:HGNC:16191]	150.301	69.7958	146.776	55.5278	68.3871	23.7177	10.8964	23.4973	7.02035	8.58449	9.33413	4.6514	6.75676	6.05656	7.3362	9.86682	6.96047
ENSGALG00000012023	DACT1	ENSGALT00000019620;ENSGALT00000085274	GO:0005737(cytoplasm);GO:0030877(beta-catenin destruction complex);GO:0005654(nucleoplasm);GO:0005634(nucleus);GO:2000134(negative regulation of G1/S transition of mitotic cell cycle);GO:2000095(regulation of Wnt signaling pathway, planar cell polarity pathway);GO:1904864(negative regulation of beta-catenin-TCF complex assembly);GO:1903364(positive regulation of cellular protein catabolic process…	NA	NA	NA	dishevelled binding antagonist of beta catenin 1 [Source:HGNC Symbol;Acc:HGNC:17748]	78.0343	67.5396	65.5679	57.1418	55.1697	25.6153	32.5672	28.3836	7.39382	5.05757	8.46183	5.21189	4.63092	8.58135	4.62009	6.55648	8.07024
ENSGALG00000009732	PCDH18	ENSGALT00000015841;ENSGALT00000055929	GO:0007420(brain development);GO:0007155(cell adhesion);GO:0007399(nervous system development);GO:0005886(plasma membrane);GO:0007156(homophilic cell adhesion via plasma membrane adhesion molecules);GO:0007267(cell-cell signaling);GO:0005887(integral component of plasma membrane);GO:0005509(calcium ion binding);GO:0016021(integral component of membrane);GO:0016020(membrane);GO:0016020(membrane)	NA	NA	NA	protocadherin 18 [Source:HGNC Symbol;Acc:HGNC:14268]	47.1552	47.1668	41.7855	30.017	28.4453	15.2704	21.0002	15.8815	4.65139	4.90728	5.38793	4.1407	3.55671	4.37303	3.03475	2.94192	6.02812
ENSGALG00000008885	PDE1A	ENSGALT00000014439	GO:0004114(3',5'-cyclic-nucleotide phosphodiesterase activity);GO:0008081(phosphoric diester hydrolase activity);GO:0016787(hydrolase activity);GO:0046872(metal ion binding);GO:0007165(signal transduction)	NA	NA	NA	phosphodiesterase 1A [Source:HGNC Symbol;Acc:HGNC:8774]	18.1592	18.535	17.5838	8.22257	9.97574	3.92848	3.55099	3.98921	1.80928	1.29503	1.25921	1.43545	1.4487	1.46966	0.995703	0.981734	0.817406
ENSGALG00000001101	MBD3	ENSGALT00000049298;ENSGALT00000062268;ENSGALT00000041172	GO:0000122(negative regulation of transcription from RNA polymerase II promoter);GO:0005634(nucleus);GO:0008327(methyl-CpG binding);GO:0006346(methylation-dependent chromatin silencing);GO:0000790(nuclear chromatin);GO:0005737(cytoplasm);GO:0000978(RNA polymerase II core promoter proximal region sequence-specific DNA binding);GO:0003677(DNA binding);GO:0001701(in utero embryonic development);GO:0…	NA	NA	NA	methyl-CpG binding domain protein 3 [Source:HGNC Symbol;Acc:HGNC:6918]	32.3127	31.6707	31.8597	8.81398	13.0086	2.56501	6.50828	5.23912	1.32249	1.40551	1.52557	1.32569	1.2108	2.72221	1.43403	1.57162	1.69728
ENSGALG00000011991	MYOZ2	ENSGALT00000086663;ENSGALT00000019560	GO:0030018(Z disc);GO:0030239(myofibril assembly);GO:0015629(actin cytoskeleton);GO:0051373(FATZ binding);GO:0031433(telethonin binding);GO:0003779(actin binding);GO:0003779(actin binding)	NA	NA	NA	myozenin 2 [Source:HGNC Symbol;Acc:HGNC:1330]	87.8978	110.712	72.5188	77.0516	57.0675	33.2759	52.8964	88.4533	3.75477	3.12865	1.28617	3.06983	0.594202	2.51402	0.440507	0.289144	0.531813
ENSGALG00000004852	DNM1	ENSGALT00000007750	GO:0070062(extracellular exosome);GO:0043209(myelin sheath);GO:0030117(membrane coat);GO:0001917(photoreceptor inner segment);GO:1901998(toxin transport);GO:0051932(synaptic transmission, GABAergic);GO:0051262(protein tetramerization);GO:0016185(synaptic vesicle budding from presynaptic endocytic zone membrane);GO:0008344(adult locomotory behavior);GO:0007605(sensory perception of sound);GO:00070…	04144(Endocytosis)	K01528	EC:3.6.5.5	dynamin 1 [Source:HGNC Symbol;Acc:HGNC:2972]	51.347	42.9485	48.4221	16.833	15.9515	6.70549	9.24479	8.98984	3.4256	2.24718	3.67085	3.199	2.20556	5.18533	2.19678	2.82206	3.48267
ENSGALG00000001130	GALNT17	ENSGALT00000001706	GO:0030246(carbohydrate binding);GO:0006486(protein glycosylation);GO:0005794(Golgi apparatus);GO:0000139(Golgi membrane);GO:0016757(transferase activity, transferring glycosyl groups);GO:0016740(transferase activity);GO:0016021(integral component of membrane);GO:0016020(membrane)	00512(Mucin type O-glycan biosynthesis)	K00710	EC:2.4.1.41	polypeptide N-acetylgalactosaminyltransferase 17 [Source:HGNC Symbol;Acc:HGNC:16347]	25.3271	26.5214	21.1935	34.1576	33.069	9.63094	10.5552	13.2013	2.4338	3.0399	3.72594	4.07911	3.82357	3.09308	1.09998	2.1692	1.75732
ENSGALG00000001048	OLFML2A	ENSGALT00000001570	GO:0005578(proteinaceous extracellular matrix);GO:0030198(extracellular matrix organization);GO:0050840(extracellular matrix binding);GO:0042803(protein homodimerization activity)	NA	NA	NA	olfactomedin like 2A [Source:HGNC Symbol;Acc:HGNC:27270]	38.2314	50.9663	47.7257	109.104	125.187	44.4463	55.7502	54.4265	14.0689	13.7156	16.3003	11.015	9.14894	9.94335	6.19294	11.7324	9.44012
ENSGALG00000004290	ANGPTL1	ENSGALT00000006824;ENSGALT00000087428	GO:0070062(extracellular exosome);GO:0005615(extracellular space);GO:0007169(transmembrane receptor protein tyrosine kinase signaling pathway);GO:0005102(receptor binding);GO:0005102(receptor binding)	NA	NA	NA	angiopoietin like 1 [Source:HGNC Symbol;Acc:HGNC:489]	59.0817	48.1178	56.7436	18.8732	19.1734	8.64643	10.3019	11.7662	4.92563	2.84409	3.02501	3.84341	2.71144	2.71479	3.82132	4.04487	1.73373
ENSGALG00000045196	LAPTM4B	ENSGALT00000062557	GO:0007032(endosome organization);GO:0031902(late endosome membrane);GO:0005768(endosome);GO:0005769(early endosome);GO:0005764(lysosome);GO:0005765(lysosomal membrane);GO:0042995(cell projection);GO:0005886(plasma membrane);GO:0019900(kinase binding);GO:0031625(ubiquitin protein ligase binding);GO:0097001(ceramide binding);GO:0032585(multivesicular body membrane);GO:1902936(phosphatidylinositol …	NA	NA	NA	lysosomal protein transmembrane 4 beta [Source:HGNC Symbol;Acc:HGNC:13646]	135.468	126.655	148.887	55.522	50.471	40.4542	34.1196	50.7275	19.2573	7.29727	9.66472	3.84448	5.18041	2.61381	4.36029	4.39899	6.92455
ENSGALG00000045368		ENSGALT00000089899;ENSGALT00000083275;ENSGALT00000084893	NA	NA	NA	NA		8.13838	7.76461	7.52758	7.52716	6.79935	3.22465	3.95883	4.83347	0.537561	0.759422	0.395524	0.626165	0.443996	0.396492	0.6488	0.346522	0.25991
ENSGALG00000010461	EBF3	ENSGALT00000060399;ENSGALT00000080706;ENSGALT00000017030	GO:0045944(positive regulation of transcription from RNA polymerase II promoter);GO:0045893(positive regulation of transcription, DNA-templated);GO:0001077(transcriptional activator activity, RNA polymerase II core promoter proximal region sequence-specific binding);GO:0000978(RNA polymerase II core promoter proximal region sequence-specific DNA binding);GO:0007275(multicellular organism developm…	NA	NA	NA	early B-cell factor 3 [Source:HGNC Symbol;Acc:HGNC:19087]	54.696	47.8812	52.4931	31.4568	30.3149	19.9102	33.0838	26.7364	7.43794	6.50641	7.70358	7.70918	6.47107	6.46943	4.47582	5.99677	4.24435
ENSGALG00000010229	ABCD4	ENSGALT00000016629;ENSGALT00000057480;ENSGALT00000054865;ENSGALT00000076603	GO:0005789(endoplasmic reticulum membrane);GO:0005777(peroxisome);GO:0009235(cobalamin metabolic process);GO:0042626(ATPase activity, coupled to transmembrane movement of substances);GO:0016887(ATPase activity);GO:0055085(transmembrane transport);GO:0005524(ATP binding);GO:0000166(nucleotide binding);GO:0016021(integral component of membrane);GO:0016020(membrane);GO:1990830(cellular response to l…	02010(ABC transporters);04146(Peroxisome);04146(Peroxisome)	K05678	NA	ATP binding cassette subfamily D member 4 [Source:HGNC Symbol;Acc:HGNC:68]	23.9454	28.6514	22.701	33.25	21.1494	5.35787	7.23929	8.53313	3.34496	3.18567	2.50956	2.82602	3.03329	3.63734	2.4703	2.18023	2.13676
ENSGALG00000027853		ENSGALT00000025728	GO:0048854(brain morphogenesis);GO:0005913(cell-cell adherens junction);GO:0045296(cadherin binding);GO:0051015(actin filament binding);GO:0007155(cell adhesion)	NA	NA	NA		22.2502	16.7338	15.839	7.22731	8.7279	2.39565	2.95805	2.21087	0.98359	0.807703	1.28176	1.17615	0.851294	0.657008	0.819179	1.2546	0.806784
ENSGALG00000040960		ENSGALT00000051380	NA	NA	NA	NA		90.0794	103.057	96.4079	61.4504	66.739	65.9221	93.8806	64.0091	16.9525	9.19334	11.373	7.03426	7.97181	12.4175	7.85434	9.13562	8.76506
ENSGALG00000006174	VSTM4	ENSGALT00000009968	GO:0016021(integral component of membrane);GO:0005886(plasma membrane);GO:0016020(membrane)	NA	NA	NA	V-set and transmembrane domain containing 4 [Source:HGNC Symbol;Acc:HGNC:26470]	28.3319	26.896	28.399	16.9044	17.1364	7.8362	4.9256	5.2627	0.973453	0.894944	0.477646	1.18704	0.598568	0.805457	0.680127	0.699899	0.146546
ENSGALG00000004270	ALDH1A2	ENSGALT00000084591	GO:0042572(retinol metabolic process);GO:0001947(heart looping);GO:0021522(spinal cord motor neuron differentiation);GO:0004745(retinol dehydrogenase activity);GO:0001758(retinal dehydrogenase activity);GO:0003007(heart morphogenesis);GO:0005737(cytoplasm);GO:0071300(cellular response to retinoic acid);GO:0060324(face development);GO:0048738(cardiac muscle tissue development);GO:0048566(embryonic…	00830(Retinol metabolism)	K07249	EC:1.2.1.36	Retinal dehydrogenase 2 [Source:UniProtKB/Swiss-Prot;Acc:O93344]	84.0916	71.9045	68.6389	24.006	21.5005	12.5336	9.97608	12.2964	6.62982	3.50025	2.69269	5.14537	4.92313	2.96126	1.48624	3.43309	1.43602
ENSGALG00000033677	AHCY	ENSGALT00000074779;ENSGALT00000049576;ENSGALT00000051087	GO:0005829(cytosol);GO:0070062(extracellular exosome);GO:0070062(extracellular exosome)	00270(Cysteine and methionine metabolism);00270(Cysteine and methionine metabolism)	K01251	EC:3.3.1.1	adenosylhomocysteinase [Source:HGNC Symbol;Acc:HGNC:343]	336.413	439.986	371.077	297.076	251.31	71.8052	59.7347	100.495	54.0219	41.5046	65.1889	31.4755	28.7346	31.5968	20.0606	35.4627	38.2148
ENSGALG00000006864	COL24A1	ENSGALT00000011110	GO:0002244(hematopoietic progenitor cell differentiation)	NA	NA	NA	collagen type XXIV alpha 1 chain [Source:HGNC Symbol;Acc:HGNC:20821]	4.9898	7.09975	4.31291	3.55251	3.274	1.17025	1.23188	1.29528	0.364539	0.260119	0.366468	0.174478	0.065539	0.044804	0.026471	0.006794	0.015701
ENSGALG00000034168	WNT5A	ENSGALT00000070747;ENSGALT00000057121	GO:0005578(proteinaceous extracellular matrix);GO:0045165(cell fate commitment);GO:0030182(neuron differentiation);GO:0016055(Wnt signaling pathway);GO:0005109(frizzled binding);GO:0007275(multicellular organism development);GO:0005622(intracellular);GO:0005102(receptor binding);GO:0005576(extracellular region);GO:0005615(extracellular space);GO:0003700(transcription factor activity, sequence-spe…	04310(Wnt signaling pathway);04150(mTOR signaling pathway);04916(Melanogenesis);04916(Melanogenesis)	K00444	NA	Wnt family member 5A [Source:HGNC Symbol;Acc:HGNC:12784]	42.9187	34.5402	33.2527	12.0974	12.0719	12.0651	12.7534	15.5307	3.60269	4.18085	4.71963	3.35614	1.52713	1.6129	0.596112	1.16384	0.630639
ENSGALG00000001121	SH3GL1	ENSGALT00000001690	GO:0002102(podosome);GO:0031901(early endosome membrane);GO:0006897(endocytosis);GO:0005768(endosome);GO:0045202(synapse);GO:0030054(cell junction);GO:0042995(cell projection);GO:0005737(cytoplasm);GO:0008289(lipid binding);GO:0016020(membrane);GO:0042802(identical protein binding);GO:0045296(cadherin binding);GO:0016191(synaptic vesicle uncoating)	04144(Endocytosis)	K11247	NA	SH3 domain containing GRB2 like 1, endophilin A2 [Source:HGNC Symbol;Acc:HGNC:10830]	100.901	109.793	119.403	89.8439	79.5352	25.4705	29.4727	26.9783	10.4852	9.65933	10.256	9.8206	9.14513	18.9238	8.21146	10.4645	13.1721
ENSGALG00000042492	PITX2	ENSGALT00000075211;ENSGALT00000085419;ENSGALT00000078825;ENSGALT00000075932	GO:0005634(nucleus);GO:0045944(positive regulation of transcription from RNA polymerase II promoter);GO:0006357(regulation of transcription from RNA polymerase II promoter);GO:0005737(cytoplasm);GO:0003677(DNA binding);GO:0001764(neuron migration);GO:0016055(Wnt signaling pathway);GO:0055009(atrial cardiac muscle tissue morphogenesis);GO:0009887(animal organ morphogenesis);GO:0030324(lung develop…	04350(TGF-beta signaling pathway);04350(TGF-beta signaling pathway)	K04686	NA	paired like homeodomain 2 [Source:HGNC Symbol;Acc:HGNC:9005]	32.3218	28.4806	29.3855	23.2959	17.2867	9.50193	12.8064	18.773	2.03449	0.46249	0.88615	0.95764	0.597048	0.476963	0.780446	0.882061	0.528626
ENSGALG00000041730	GPR20	ENSGALT00000064865;ENSGALT00000058217	GO:0005887(integral component of plasma membrane);GO:0004930(G-protein coupled receptor activity);GO:0043235(receptor complex);GO:0043235(receptor complex)	NA	NA	NA	G protein-coupled receptor 20 [Source:HGNC Symbol;Acc:HGNC:4475]	8.99794	11.4831	6.62237	13.63	11.4128	2.7689	2.84548	4.79666	0.713368	0.297448	0.285164	0.27639	0.183265	0.234352	0.142776	0.178652	0.10628
ENSGALG00000006837	TSPAN4	ENSGALT00000011062;ENSGALT00000054634	GO:0007166(cell surface receptor signaling pathway);GO:0005887(integral component of plasma membrane);GO:0016021(integral component of membrane);GO:0016020(membrane);GO:0005178(integrin binding);GO:0005925(focal adhesion);GO:0005886(plasma membrane);GO:0031982(vesicle);GO:0006461(protein complex assembly);GO:0003823(antigen binding);GO:0003823(antigen binding)	NA	NA	NA	tetraspanin 4 [Source:HGNC Symbol;Acc:HGNC:11859]	136.506	146.086	129.639	65.347	68.3816	69.1008	46.8198	43.958	15.9679	13.8627	15.0065	12.9291	11.7384	20.4329	15.1341	16.0329	13.1504
ENSGALG00000015196	ASXL3	ENSGALT00000024516	GO:0006351(transcription, DNA-templated);GO:0006355(regulation of transcription, DNA-templated);GO:0003677(DNA binding)	NA	NA	NA	additional sex combs like 3, transcriptional regulator [Source:HGNC Symbol;Acc:HGNC:29357]	14.6316	10.5594	10.8138	6.67129	6.23726	3.85112	2.6705	3.22605	1.26892	0.774484	0.633738	0.823398	0.464799	0.524549	0.342462	0.713229	0.514479
ENSGALG00000001229	SKI	ENSGALT00000001864;ENSGALT00000077442	GO:0043234(protein complex);GO:0016605(PML body);GO:0016604(nuclear body);GO:0005654(nucleoplasm);GO:0005813(centrosome);GO:0005634(nucleus);GO:0070207(protein homotrimerization);GO:0060395(SMAD protein signal transduction);GO:0045668(negative regulation of osteoblast differentiation);GO:0043388(positive regulation of DNA binding);GO:0032926(negative regulation of activin receptor signaling pathw…	NA	NA	NA	SKI proto-oncogene [Source:HGNC Symbol;Acc:HGNC:10896]	77.8117	69.4008	78.2716	60.8126	56.3859	38.0344	46.0804	38.3515	11.9946	11.9963	12.5134	12.8158	12.6916	16.3131	10.6399	10.0925	7.76781
ENSGALG00000030836	PSD2	ENSGALT00000074360	NA	04144(Endocytosis)	K12494	NA	pleckstrin and Sec7 domain containing 2 [Source:HGNC Symbol;Acc:HGNC:19092]	12.34	9.44165	11.5483	2.97646	2.34314	0.787617	1.60702	0.811051	0.226622	0.180929	0.476997	0.372515	0.526235	0.30242	0.068927	0.10043	0.158266
ENSGALG00000038688	ADAMTS17	ENSGALT00000061603;ENSGALT00000062948;ENSGALT00000074281	NA	NA	NA	NA	ADAM metallopeptidase with thrombospondin type 1 motif 17 [Source:HGNC Symbol;Acc:HGNC:17109]	18.2792	21.1441	22.0739	13.6266	11.7255	3.23979	2.59459	2.22664	0.690329	0.918323	1.55983	0.72993	1.50834	0.799982	1.0887	1.70039	0.855578
ENSGALG00000041014		ENSGALT00000056905	NA	NA	NA	NA		25.6395	23.2983	20.1987	65.0706	57.2877	26.9251	19.172	33.2329	6.01276	3.96701	3.02342	5.06	3.55766	3.47449	2.70089	2.97443	1.85353
ENSGALG00000012691	ALDH1L2	ENSGALT00000020714;ENSGALT00000075438	GO:0009258(10-formyltetrahydrofolate catabolic process);GO:0016155(formyltetrahydrofolate dehydrogenase activity);GO:0006730(one-carbon metabolic process);GO:0004029(aldehyde dehydrogenase (NAD) activity);GO:0009058(biosynthetic process);GO:0016742(hydroxymethyl-, formyl- and related transferase activity);GO:0016491(oxidoreductase activity);GO:0055114(oxidation-reduction process);GO:0008152(metab…	00670(One carbon pool by folate);00670(One carbon pool by folate)	K00289	EC:1.5.1.6	aldehyde dehydrogenase 1 family member L2 [Source:HGNC Symbol;Acc:HGNC:26777]	243.799	298.539	319.204	190.001	170.401	53.3307	40.5753	49.1088	41.1484	52.4294	24.5377	28.9134	24.3461	27.0321	30.054	29.8883	19.7569
ENSGALG00000039786	FGFR1	ENSGALT00000066938	GO:0018108(peptidyl-tyrosine phosphorylation);GO:0008284(positive regulation of cell proliferation);GO:0042802(identical protein binding);GO:0008201(heparin binding);GO:0008543(fibroblast growth factor receptor signaling pathway);GO:0046777(protein autophosphorylation);GO:0042803(protein homodimerization activity);GO:0000122(negative regulation of transcription from RNA polymerase II promoter);GO…	04010(MAPK signaling pathway);04520(Adherens junction);04810(Regulation of actin cytoskeleton)	K04362	EC:2.7.10.1	fibroblast growth factor receptor 1 [Source:HGNC Symbol;Acc:HGNC:3688]	149.162	139.859	139.959	112.568	117.92	62.668	67.0657	78.0847	20.0918	14.0713	23.4376	15.7776	16.0939	10.7217	14.133	18.4786	22.0758
ENSGALG00000016781	MAP4K4	ENSGALT00000008104;ENSGALT00000073690;ENSGALT00000062771;ENSGALT00000056835;ENSGALT00000059977;ENSGALT00000052405	GO:0000185(activation of MAPKKK activity);GO:0048812(neuron projection morphogenesis);GO:0007346(regulation of mitotic cell cycle);GO:0042981(regulation of apoptotic process);GO:0000165(MAPK cascade);GO:0005737(cytoplasm);GO:0006468(protein phosphorylation);GO:0005524(ATP binding);GO:0004672(protein kinase activity);GO:0031098(stress-activated protein kinase signaling cascade);GO:0004111(creatine…	04010(MAPK signaling pathway);04010(MAPK signaling pathway)	K04407	EC:2.7.11.1	mitogen-activated protein kinase kinase kinase kinase 4 [Source:HGNC Symbol;Acc:HGNC:6866]	67.861	68.9683	68.716	49.1604	37.6935	27.187	33.0646	32.4727	12.9628	10.4033	6.60853	11.13	8.13391	7.15523	5.02116	5.21081	4.139
ENSGALG00000044874		ENSGALT00000084155	NA	NA	NA	NA		43.5097	44.881	43.4391	27.9528	30.1725	2.34326	2.3095	2.80506	0.274295	0.718516	1.27668	1.45182	0.367908	1.67632	0.760237	0.282021	0.632349
ENSGALG00000005676	TTC28	ENSGALT00000056256;ENSGALT00000009103	GO:0019900(kinase binding);GO:0007346(regulation of mitotic cell cycle);GO:0030496(midbody);GO:0030496(midbody)	NA	NA	NA	tetratricopeptide repeat domain 28 [Source:HGNC Symbol;Acc:HGNC:29179]	48.7315	45.1272	45.2888	30.9119	37.051	18.8894	20.644	18.6926	6.82521	6.38735	6.35702	8.14161	8.48218	8.81001	10.0746	8.60672	8.71724
ENSGALG00000032418	RAB26	ENSGALT00000060915;ENSGALT00000065734	GO:0005525(GTP binding);GO:0000139(Golgi membrane);GO:0043001(Golgi to plasma membrane protein transport);GO:0030667(secretory granule membrane);GO:0019002(GMP binding);GO:0035272(exocrine system development);GO:0045055(regulated exocytosis);GO:0045055(regulated exocytosis)	NA	NA	NA	RAB26, member RAS oncogene family [Source:HGNC Symbol;Acc:HGNC:14259]	27.4397	30.13	31.1102	12.5881	15.5005	3.66228	2.68728	2.858	2.60934	2.30763	2.56515	0.302435	1.07663	1.03534	0.853163	1.17978	1.60576
ENSGALG00000040834	LGR4	ENSGALT00000073022	NA	NA	NA	NA	leucine rich repeat containing G protein-coupled receptor 4 [Source:HGNC Symbol;Acc:HGNC:13299]	30.2045	27.6639	28.5702	18.8306	19.317	7.88231	8.93782	9.28822	4.15209	3.47114	2.84853	3.31334	3.62074	2.1015	3.11924	2.39737	1.5637
ENSGALG00000015480	POGLUT1	ENSGALT00000024967	GO:0070062(extracellular exosome);GO:0005788(endoplasmic reticulum lumen);GO:0072358(cardiovascular system development);GO:0048339(paraxial mesoderm development);GO:0048318(axial mesoderm development);GO:0008593(regulation of Notch signaling pathway);GO:0006493(protein O-linked glycosylation);GO:0001756(somitogenesis);GO:0046527(glucosyltransferase activity);GO:0035252(UDP-xylosyltransferase acti…	00514(Other types of O-glycan biosynthesis)	K13667	EC:2.4.1.-	protein O-glucosyltransferase 1 [Source:HGNC Symbol;Acc:HGNC:22954]	29.2735	30.2988	28.0095	13.2018	10.8322	3.97307	4.34585	4.92817	2.62742	1.58944	2.66891	2.15206	2.20117	3.90833	3.04355	2.43688	2.86561
ENSGALG00000000227	DPYSL2	ENSGALT00000000305;ENSGALT00000031500	GO:0007010(cytoskeleton organization);GO:0007420(brain development);GO:0007399(nervous system development);GO:0016810(hydrolase activity, acting on carbon-nitrogen (but not peptide) bonds);GO:0007411(axon guidance);GO:0030154(cell differentiation);GO:0008017(microtubule binding);GO:0016787(hydrolase activity);GO:0005737(cytoplasm);GO:0007275(multicellular organism development);GO:0030516(regulati…	NA	NA	NA	dihydropyrimidinase like 2 [Source:HGNC Symbol;Acc:HGNC:3014]	126.756	154.671	130.796	62.2741	57.283	29.6811	34.5912	29.2764	10.971	8.17609	14.16	13.6311	11.7762	19.6519	9.92092	16.0838	16.1621
ENSGALG00000005806	KIF24	ENSGALT00000009323;ENSGALT00000044796	GO:0043234(protein complex);GO:0005814(centriole);GO:0060271(cilium assembly);GO:0007019(microtubule depolymerization);GO:0042802(identical protein binding);GO:0003777(microtubule motor activity);GO:0005871(kinesin complex);GO:0007018(microtubule-based movement);GO:0016887(ATPase activity);GO:0008017(microtubule binding);GO:0003774(motor activity);GO:0005524(ATP binding);GO:0000166(nucleotide bin…	NA	NA	NA	kinesin family member 24 [Source:HGNC Symbol;Acc:HGNC:19916]	18.694	16.4474	18.0671	10.7192	11.6073	1.55623	0.837343	1.71941	1.31557	0.337763	0.356968	0.398166	0.361795	0.590751	0.375193	0.395713	0.175008
ENSGALG00000036824	CDH23	ENSGALT00000082526;ENSGALT00000063543;ENSGALT00000081065	NA	NA	NA	NA	cadherin related 23 [Source:HGNC Symbol;Acc:HGNC:13733]	37.7561	33.7582	30.9753	7.43598	7.33969	2.59953	5.85926	4.3532	3.38998	2.45833	3.33296	1.49368	2.70733	1.83694	1.42392	2.00623	0.86367
ENSGALG00000001640	RNF122	ENSGALT00000002505	GO:0043161(proteasome-mediated ubiquitin-dependent protein catabolic process);GO:0000209(protein polyubiquitination);GO:0042787(protein ubiquitination involved in ubiquitin-dependent protein catabolic process);GO:0061630(ubiquitin protein ligase activity);GO:0016021(integral component of membrane);GO:0016020(membrane)	NA	NA	NA	ring finger protein 122 [Source:HGNC Symbol;Acc:HGNC:21147]	36.3004	45.2966	36.5936	59.1243	50.8324	7.23906	11.9929	8.3984	2.20585	2.07577	3.05154	1.63822	1.14528	2.82837	0.870209	2.62195	1.55935
ENSGALG00000012796	KIAA1549	ENSGALT00000020879	GO:0016021(integral component of membrane);GO:0016020(membrane)	NA	NA	NA	KIAA1549 [Source:HGNC Symbol;Acc:HGNC:22219]	45.6419	46.5004	46.5189	32.1816	29.896	21.8481	16.7086	14.4708	8.4442	7.80873	9.50709	5.45724	5.60065	6.51274	7.21494	6.22201	6.65511
ENSGALG00000008188	TRIM36	ENSGALT00000013337;ENSGALT00000049295	GO:0070062(extracellular exosome);GO:0001669(acrosomal vesicle);GO:0007340(acrosome reaction);GO:0016567(protein ubiquitination);GO:0051726(regulation of cell cycle);GO:0005622(intracellular);GO:0046872(metal ion binding);GO:0008270(zinc ion binding);GO:0004842(ubiquitin-protein transferase activity);GO:0043014(alpha-tubulin binding);GO:0000281(mitotic cytokinesis);GO:0007051(spindle organization…	NA	NA	NA	tripartite motif containing 36 [Source:HGNC Symbol;Acc:HGNC:16280]	12.4819	13.7555	13.8959	21.2804	18.7128	4.00584	2.16678	4.0004	0.0533693	0.191198	0.334615	0.247988	0.048644	0.206119	0.19364	0.161939	0.0471869
ENSGALG00000009205		ENSGALT00000014988	NA	NA	NA	NA		7.88156	8.74065	7.695	9.17002	8.29866	2.19863	2.60495	2.35641	0.741654	0.750714	0.954695	0.555262	0.639051	0.716259	0.516947	1.02242	1.00817
ENSGALG00000004420	SDK1	ENSGALT00000083692;ENSGALT00000071612;ENSGALT00000007042	GO:0070062(extracellular exosome);GO:0048148(behavioral response to cocaine);GO:0060998(regulation of dendritic spine development);GO:0016021(integral component of membrane);GO:0016020(membrane);GO:0016020(membrane)	NA	NA	NA	sidekick cell adhesion molecule 1 [Source:HGNC Symbol;Acc:HGNC:19307]	17.6073	12.6595	20.2011	12.834	12.2078	5.50714	6.63169	6.71378	2.15453	1.8427	3.29431	1.70365	2.03748	2.05111	1.06102	1.69721	1.47727
ENSGALG00000035701	SMAD3	ENSGALT00000074963;ENSGALT00000051292	GO:0019901(protein kinase binding);GO:0008134(transcription factor binding);GO:0005634(nucleus);GO:0050728(negative regulation of inflammatory response);GO:0000987(core promoter proximal region sequence-specific DNA binding);GO:0045944(positive regulation of transcription from RNA polymerase II promoter);GO:0042802(identical protein binding);GO:0043130(ubiquitin binding);GO:0008270(zinc ion bindi…	04350(TGF-beta signaling pathway);04371(Apelin signaling pathway);04068(FoxO signaling pathway);04144(Endocytosis);04110(Cell cycle);04218(Cellular senescence);04520(Adherens junction);04933(AGE-RAGE signaling pathway in diabetic complications);04933(AGE-RAGE signaling pathway in diabetic complications)	K04500	NA	SMAD family member 3 [Source:HGNC Symbol;Acc:HGNC:6769]	99.3039	88.3928	93.7201	50.2284	49.036	21.6689	21.2572	24.0613	9.43247	8.19842	8.5578	5.88983	7.33231	12.9913	9.30042	11.201	13.2206
ENSGALG00000016433	YWHAQ	ENSGALT00000082606;ENSGALT00000036909;ENSGALT00000075049;ENSGALT00000060995;ENSGALT00000087401	GO:0019904(protein domain specific binding);GO:0005737(cytoplasm);GO:0042802(identical protein binding);GO:0005925(focal adhesion);GO:0016020(membrane);GO:0070062(extracellular exosome);GO:0045892(negative regulation of transcription, DNA-templated);GO:0047485(protein N-terminus binding);GO:0006605(protein targeting);GO:0007264(small GTPase mediated signal transduction);GO:0021762(substantia nigr…	04110(Cell cycle);04114(Oocyte meiosis);04114(Oocyte meiosis)	K16197	NA	tyrosine 3-monooxygenase/tryptophan 5-monooxygenase activation protein theta [Source:HGNC Symbol;Acc:HGNC:12854]	222.065	238.417	245.657	137.97	127.682	97.3519	92.1186	110.818	26.9917	22.3542	18.2651	31.2108	24.739	45.7855	29.6893	28.3632	27.7641
ENSGALG00000004850	ZMIZ1	ENSGALT00000007743;ENSGALT00000078858	GO:0043231(intracellular membrane-bounded organelle);GO:0005654(nucleoplasm);GO:0048844(artery morphogenesis);GO:0048589(developmental growth);GO:0048146(positive regulation of fibroblast proliferation);GO:0045944(positive regulation of transcription from RNA polymerase II promoter);GO:0045747(positive regulation of Notch signaling pathway);GO:0045582(positive regulation of T cell differentiation…	NA	NA	NA	zinc finger MIZ-type containing 1 [Source:HGNC Symbol;Acc:HGNC:16493]	46.3237	52.6192	49.3388	43.1679	39.335	35.7154	37.5293	35.6787	10.9476	11.9712	10.1111	6.02954	5.18634	7.92722	9.58541	9.43756	10.1563
ENSGALG00000040079	ZFPM2	ENSGALT00000062717	NA	NA	NA	NA	zinc finger protein, FOG family member 2 [Source:HGNC Symbol;Acc:HGNC:16700]	4.5099	4.12023	5.26545	6.13024	5.96161	1.12249	0.565361	0.971333	0.346223	0.169362	0.309452	0.13521	0.10832	0.21226	0.249869	0.194351	0.207479
ENSGALG00000045870		ENSGALT00000084468	NA	NA	NA	NA		63.2995	49.1705	53.3336	27.0137	21.1384	10.4411	7.76969	10.77	6.71178	3.93275	3.2278	6.27253	3.87017	4.43869	4.7581	4.63911	5.27519
ENSGALG00000008393	CREB3L1	ENSGALT00000013673	GO:0016020(membrane);GO:0005783(endoplasmic reticulum);GO:0005634(nucleus);GO:0032967(positive regulation of collagen biosynthetic process);GO:0046332(SMAD binding);GO:0045944(positive regulation of transcription from RNA polymerase II promoter);GO:0030968(endoplasmic reticulum unfolded protein response);GO:0035497(cAMP response element binding);GO:0003700(transcription factor activity, sequence-…	04916(Melanogenesis);04261(Adrenergic signaling in cardiomyocytes)	K09048	NA	cAMP responsive element binding protein 3 like 1 [Source:HGNC Symbol;Acc:HGNC:18856]	62.9173	61.1625	68.6365	44.4709	48.5093	13.4714	19.9675	12.7157	5.86996	3.29886	6.96028	9.25663	7.47012	7.8267	3.31412	5.24177	5.39584
ENSGALG00000010031	ARHGAP10	ENSGALT00000016293	GO:0005829(cytosol);GO:0043066(negative regulation of apoptotic process);GO:0007010(cytoskeleton organization);GO:0005096(GTPase activator activity);GO:0043547(positive regulation of GTPase activity);GO:0007165(signal transduction)	NA	NA	NA	Rho GTPase activating protein 10 [Source:HGNC Symbol;Acc:HGNC:26099]	54.2819	60.3113	58.284	19.2191	17.1078	7.25104	7.38998	11.0174	5.37943	4.29995	2.0451	4.6181	3.18764	3.46145	6.29533	4.80462	6.23394
ENSGALG00000040655	FAM20A	ENSGALT00000054713;ENSGALT00000063533	GO:0001934(positive regulation of protein phosphorylation);GO:0005615(extracellular space);GO:0005783(endoplasmic reticulum);GO:0005794(Golgi apparatus);GO:0070062(extracellular exosome);GO:0031214(biomineral tissue development);GO:0070166(enamel mineralization);GO:0055074(calcium ion homeostasis);GO:0043539(protein serine/threonine kinase activator activity);GO:0044691(tooth eruption);GO:0005623…	NA	NA	NA	FAM20A, golgi associated secretory pathway pseudokinase [Source:HGNC Symbol;Acc:HGNC:23015]	14.7001	15.3483	22.3445	21.5517	23.5905	11.6634	10.2255	12.477	2.06755	3.04717	2.48879	1.44752	1.62808	2.30909	1.26124	1.62924	1.77636
ENSGALG00000022622	HOXA4	ENSGALT00000029853;ENSGALT00000080862	GO:0016604(nuclear body);GO:0043565(sequence-specific DNA binding);GO:0003700(transcription factor activity, sequence-specific DNA binding);GO:0007275(multicellular organism development);GO:0006355(regulation of transcription, DNA-templated);GO:0006351(transcription, DNA-templated);GO:0005634(nucleus);GO:0003677(DNA binding);GO:0003677(DNA binding)	NA	NA	NA	homeobox A4 [Source:HGNC Symbol;Acc:HGNC:5105]	18.3903	18.8477	18.4215	8.80247	9.74264	8.55696	11.0034	10.0386	2.15269	1.86838	2.19353	2.75238	1.72374	2.07433	1.2762	1.55669	1.32243
ENSGALG00000015112		ENSGALT00000061971;ENSGALT00000053267;ENSGALT00000024382;ENSGALT00000066032	GO:0003676(nucleic acid binding);GO:0003676(nucleic acid binding)	NA	NA	NA		39.9484	33.097	36.8855	26.4335	27.8248	15.7479	15.8949	17.8264	7.41522	5.2191	5.89242	5.92661	4.80464	6.69763	3.57448	5.05925	4.25195
ENSGALG00000035504	ER81	ENSGALT00000046369;ENSGALT00000085673	GO:0006366(transcription from RNA polymerase II promoter);GO:0000981(RNA polymerase II transcription factor activity, sequence-specific DNA binding);GO:0030154(cell differentiation);GO:0006357(regulation of transcription from RNA polymerase II promoter);GO:0005634(nucleus);GO:0043565(sequence-specific DNA binding);GO:0003700(transcription factor activity, sequence-specific DNA binding);GO:0006355…	NA	NA	NA	ETS variant 1 [Source:HGNC Symbol;Acc:HGNC:3490]	24.713	25.5269	25.6528	7.87881	9.15354	5.48823	7.72745	8.62908	2.4311	1.90253	1.36586	2.40896	1.93766	1.57017	2.26395	2.6963	1.38717
ENSGALG00000003081	SUCO	ENSGALT00000000626;ENSGALT00000057992	GO:0016020(membrane);GO:0005791(rough endoplasmic reticulum);GO:0046850(regulation of bone remodeling);GO:0045669(positive regulation of osteoblast differentiation);GO:0032967(positive regulation of collagen biosynthetic process);GO:0032967(positive regulation of collagen biosynthetic process)	NA	NA	NA	SUN domain containing ossification factor [Source:HGNC Symbol;Acc:HGNC:1240]	77.1456	83.4839	83.4004	73.4355	82.5773	22.5323	20.2368	20.8335	12.2925	14.414	13.5694	9.78493	11.9611	16.3679	15.4605	11.3771	10.0821
ENSGALG00000000478		ENSGALT00000000648	NA	NA	NA	NA		19.8474	20.0902	19.8498	20.2392	23.5755	3.13983	5.61685	8.03421	2.36038	2.01685	1.21622	0.946418	0.985051	1.34868	1.68331	1.14478	1.9968
ENSGALG00000016886	FARP1	ENSGALT00000043098;ENSGALT00000027285	GO:0005856(cytoskeleton);GO:0008092(cytoskeletal protein binding);GO:0035023(regulation of Rho protein signal transduction);GO:0005089(Rho guanyl-nucleotide exchange factor activity);GO:0065009(regulation of molecular function);GO:0065009(regulation of molecular function)	NA	NA	NA	FERM, ARH/RhoGEF and pleckstrin domain protein 1 [Source:HGNC Symbol;Acc:HGNC:3591]	52.1054	46.0171	46.7743	20.9965	24.4886	15.8835	17.1436	20.1746	4.67822	6.11567	5.55247	5.58814	5.71226	8.10592	5.6203	6.30319	8.4184
ENSGALG00000012121	RCN1	ENSGALT00000040104	GO:0005783(endoplasmic reticulum);GO:0043010(camera-type eye development);GO:0005509(calcium ion binding)	NA	NA	NA	reticulocalbin 1 [Source:HGNC Symbol;Acc:HGNC:9934]	120.719	116.314	109.773	129.818	133.765	49.1817	49.3465	47.6815	20.4785	10.5067	10.3208	21.2937	12.5418	11.2935	7.45843	10.9002	8.70292
ENSGALG00000010013	EDNRA	ENSGALT00000016263;ENSGALT00000089705	GO:0060322(head development);GO:0042310(vasoconstriction);GO:0030818(negative regulation of cAMP biosynthetic process);GO:0015758(glucose transport);GO:0014824(artery smooth muscle contraction);GO:0014032(neural crest cell development);GO:0007585(respiratory gaseous exchange);GO:0007507(heart development);GO:0001666(response to hypoxia);GO:0001569(branching involved in blood vessel morphogenesis)…	04020(Calcium signaling pathway);04080(Neuroactive ligand-receptor interaction);04270(Vascular smooth muscle contraction);04270(Vascular smooth muscle contraction)	K04197	NA	endothelin receptor type A [Source:HGNC Symbol;Acc:HGNC:3179]	43.5701	42.9156	39.2829	28.687	28.4579	16.9132	13.5893	18.272	6.72042	5.13983	4.40437	7.1741	4.98008	7.56616	4.94231	5.32751	4.54083
ENSGALG00000040241	NTRK3	ENSGALT00000072944;ENSGALT00000072330;ENSGALT00000056594	GO:0007507(heart development);GO:0005737(cytoplasm);GO:0007623(circadian rhythm);GO:0043235(receptor complex);GO:0042490(mechanoreceptor differentiation);GO:0008284(positive regulation of cell proliferation);GO:0030335(positive regulation of cell migration);GO:0051965(positive regulation of synapse assembly);GO:0002039(p53 binding);GO:0007169(transmembrane receptor protein tyrosine kinase signali…	NA	NA	NA	NT-3 growth factor receptor [Source:UniProtKB/Swiss-Prot;Acc:Q91044]	28.0997	25.4596	29.5332	16.6512	20.4113	28.7094	25.1408	28.8921	5.45819	2.80048	3.46562	1.28885	1.8619	0.935183	1.0518	1.71021	2.8588
ENSGALG00000016889	RAP2A	ENSGALT00000027292	GO:0070062(extracellular exosome);GO:0055038(recycling endosome membrane);GO:0055037(recycling endosome);GO:0016020(membrane);GO:0005886(plasma membrane);GO:0005829(cytosol);GO:0072659(protein localization to plasma membrane);GO:0048814(regulation of dendrite morphogenesis);GO:0046328(regulation of JNK cascade);GO:0045184(establishment of protein localization);GO:0035690(cellular response to drug…	NA	NA	NA	RAP2A, member of RAS oncogene family [Source:HGNC Symbol;Acc:HGNC:9861]	39.4583	33.0706	37.9601	15.6164	15.4477	10.5013	6.76315	8.88419	4.89733	4.36471	3.81812	4.62408	3.85052	4.8517	3.98739	3.54712	3.71655
ENSGALG00000033091	RUNX1T1	ENSGALT00000056858;ENSGALT00000050192;ENSGALT00000073829;ENSGALT00000056472	NA	NA	NA	NA	RUNX1 translocation partner 1 [Source:HGNC Symbol;Acc:HGNC:1535]	40.0396	41.5468	43.5381	29.5722	25.0226	13.1135	15.9516	14.7826	8.61483	3.953	4.64034	4.84992	4.68675	3.43871	1.77281	2.77714	1.73499
ENSGALG00000005209		ENSGALT00000008364	GO:0070062(extracellular exosome);GO:0030424(axon);GO:0020003(symbiont-containing vacuole);GO:0016324(apical plasma membrane);GO:0016323(basolateral plasma membrane);GO:0016021(integral component of membrane);GO:0016020(membrane);GO:0009925(basal plasma membrane);GO:0005903(brush border);GO:0005901(caveola);GO:0005886(plasma membrane);GO:0085018(maintenance of symbiont-containing vacuole by host)…	NA	NA	NA		65.4251	56.9537	57.4723	48.5183	38.3125	15.5383	13.6992	14.1591	5.7228	2.08485	2.38894	1.60961	2.61878	2.87537	1.80761	3.87367	1.33681
ENSGALG00000015258	DCBLD2	ENSGALT00000024624	GO:0009986(cell surface);GO:0005887(integral component of plasma membrane);GO:0042060(wound healing);GO:0030308(negative regulation of cell growth);GO:0016021(integral component of membrane);GO:0016020(membrane)	NA	NA	NA	discoidin, CUB and LCCL domain containing 2 [Source:HGNC Symbol;Acc:HGNC:24627]	61.9648	58.2114	57.894	51.2876	49.5987	34.9492	33.7495	36.1366	11.8091	10.2199	9.15173	10.6466	7.76556	10.6454	10.4438	7.29505	6.83281
ENSGALG00000014804	THBS4	ENSGALT00000023900	GO:0070062(extracellular exosome);GO:0031012(extracellular matrix);GO:0016529(sarcoplasmic reticulum);GO:0005783(endoplasmic reticulum);GO:0005615(extracellular space);GO:0005604(basement membrane);GO:0090023(positive regulation of neutrophil chemotaxis);GO:0071603(endothelial cell-cell adhesion);GO:0051451(myoblast migration);GO:0050731(positive regulation of peptidyl-tyrosine phosphorylation);G…	04512(ECM-receptor interaction);04145(Phagosome);04510(Focal adhesion)	K04659	NA	thrombospondin 4 [Source:HGNC Symbol;Acc:HGNC:11788]	19.7372	22.7816	16.376	14.6303	27.7252	7.44716	6.83135	5.29731	1.38066	0.660416	1.32866	0.611739	0.529823	0.322647	0.333739	0.331163	1.062
ENSGALG00000004048	PTPRS	ENSGALT00000072467;ENSGALT00000076098;ENSGALT00000006443;ENSGALT00000081870;ENSGALT00000061731;ENSGALT00000067459	GO:0061000(negative regulation of dendritic spine development);GO:0048681(negative regulation of axon regeneration);GO:0048671(negative regulation of collateral sprouting);GO:0035335(peptidyl-tyrosine dephosphorylation);GO:0030517(negative regulation of axon extension);GO:0008201(heparin binding);GO:0010977(negative regulation of neuron projection development);GO:0004721(phosphoprotein phosphatas…	NA	NA	NA	receptor-type tyrosine-protein phosphatase delta precursor [Source:RefSeq peptide;Acc:NP_990738]	118.79	114.014	114.07	86.6808	87.6993	51.5058	64.3653	62.0931	16.2489	11.6854	16.0226	16.8447	16.8014	14.6591	13.2626	13.427	21.7429
ENSGALG00000015422	NRG1	ENSGALT00000083890;ENSGALT00000084948;ENSGALT00000024876;ENSGALT00000037781	GO:0045202(synapse);GO:0044297(cell body);GO:0031594(neuromuscular junction);GO:0030673(axolemma);GO:0030424(axon);GO:0030425(dendrite);GO:0009897(external side of plasma membrane);GO:0005887(integral component of plasma membrane);GO:0005886(plasma membrane);GO:0005737(cytoplasm);GO:0005654(nucleoplasm);GO:0005634(nucleus);GO:0005576(extracellular region);GO:2001223(negative regulation of neuron …	04012(ErbB signaling pathway);04012(ErbB signaling pathway)	K05455	NA	neuregulin 1 [Source:HGNC Symbol;Acc:HGNC:7997]	7.22611	6.79084	8.29132	10.8981	11.441	9.77821	12.6954	9.04051	1.5564	1.07472	0.638447	0.450193	0.359988	0.146475	0.135394	0.158159	0.029633
ENSGALG00000033770		ENSGALT00000067344	GO:0046982(protein heterodimerization activity);GO:0005634(nucleus);GO:0045944(positive regulation of transcription from RNA polymerase II promoter);GO:0070888(E-box binding);GO:0003677(DNA binding);GO:0000122(negative regulation of transcription from RNA polymerase II promoter);GO:0006355(regulation of transcription, DNA-templated);GO:0005667(transcription factor complex);GO:0003714(transcriptio…	NA	NA	NA		43.1322	41.304	40.4414	19.4388	16.4023	26.8175	26.7727	28.4779	4.22869	3.11575	4.49227	3.07571	2.99607	4.60562	3.03668	4.50061	3.89504
ENSGALG00000003655	GAS2	ENSGALT00000005791;ENSGALT00000085434;ENSGALT00000081214	GO:0005856(cytoskeleton);GO:0008017(microtubule binding);GO:0006915(apoptotic process);GO:0006915(apoptotic process)	NA	NA	NA	growth arrest specific 2 [Source:HGNC Symbol;Acc:HGNC:4167]	13.5308	12.4458	13.1805	5.75972	4.81869	2.97126	2.63081	4.13045	0.548068	0.705678	0.567599	0.560991	1.06237	0.516687	0.416495	0.610794	0.59728
ENSGALG00000010158	KANK1	ENSGALT00000082050;ENSGALT00000016515;ENSGALT00000065269;ENSGALT00000067663;ENSGALT00000052552;ENSGALT00000056024;ENSGALT00000081020	GO:2000114(regulation of establishment of cell polarity);GO:0010977(negative regulation of neuron projection development);GO:0035024(negative regulation of Rho protein signal transduction);GO:0030336(negative regulation of cell migration);GO:0030177(positive regulation of Wnt signaling pathway);GO:0005886(plasma membrane);GO:0008013(beta-catenin binding);GO:0032587(ruffle membrane);GO:0046627(neg…	NA	NA	NA	KN motif and ankyrin repeat domains 1 [Source:HGNC Symbol;Acc:HGNC:19309]	38.6779	37.3521	37.4364	8.56499	13.9736	7.1218	7.73297	7.84081	1.20976	2.63101	2.34343	2.67755	2.61456	1.09016	1.59369	1.1289	2.40455
ENSGALG00000042020		ENSGALT00000062888;ENSGALT00000074102	GO:0030246(carbohydrate binding);GO:0030246(carbohydrate binding)	NA	NA	NA	16 kDa beta-galactoside-binding lectin [Source:UniProtKB/Swiss-Prot;Acc:P23668]	75.3208	90.0053	108.835	35.0077	26.1935	8.81638	13.9202	11.9257	13.1767	7.52953	8.80934	9.17421	10.0765	6.9016	4.16307	3.20539	2.4269
ENSGALG00000016971	TSC22D1	ENSGALT00000027423;ENSGALT00000046228;ENSGALT00000036492	GO:0003700(transcription factor activity, sequence-specific DNA binding);GO:0006355(regulation of transcription, DNA-templated);GO:0006355(regulation of transcription, DNA-templated)	NA	NA	NA	TSC22 domain family protein 1 isoform 1 [Source:RefSeq peptide;Acc:NP_001012778]	163.232	208.125	197.213	111.545	106.314	35.4511	31.6533	39.4457	27.2939	40.0443	30.7699	23.8905	20.5892	18.38	43.1229	34.7042	32.8998
ENSGALG00000005613		ENSGALT00000009008	GO:0043565(sequence-specific DNA binding);GO:0003700(transcription factor activity, sequence-specific DNA binding);GO:0007275(multicellular organism development);GO:0006355(regulation of transcription, DNA-templated);GO:0005634(nucleus);GO:0003677(DNA binding)	NA	NA	NA		83.2431	98.2157	114.692	16.0047	18.2203	22.2668	30.9586	21.9394	12.7721	8.30415	11.7299	9.42453	9.9562	11.5882	9.93413	12.1754	11.8859
ENSGALG00000007755	NEXMIF	ENSGALT00000012575	GO:0016035(zeta DNA polymerase complex);GO:0042276(error-prone translesion synthesis);GO:0005634(nucleus)	NA	NA	NA	neurite extension and migration factor [Source:HGNC Symbol;Acc:HGNC:29433]	8.61615	6.91715	7.33646	5.11986	5.14997	0.842216	0.774307	1.14632	0.350089	0.229917	0.173173	0.270123	0.169253	0.113174	0.091163	0.409811	0.201733
ENSGALG00000037193	HECW1	ENSGALT00000065224;ENSGALT00000057176;ENSGALT00000073467	GO:0005829(cytosol);GO:0005829(cytosol)	NA	NA	NA	HECT, C2 and WW domain containing E3 ubiquitin protein ligase 1 [Source:HGNC Symbol;Acc:HGNC:22195]	14.0485	10.9313	14.3957	8.61077	8.58935	3.78119	3.94767	3.31537	1.61203	1.04682	0.9098	0.690418	0.861581	0.935617	1.43459	0.715226	0.637373
ENSGALG00000032207	HMGN2	ENSGALT00000056521	GO:0031492(nucleosomal DNA binding);GO:0000785(chromatin);GO:0005634(nucleus);GO:0003677(DNA binding)	NA	NA	NA	Non-histone chromosomal protein HMG-17 [Source:UniProtKB/Swiss-Prot;Acc:P02314]	497.894	529.528	551.167	257.077	268.49	192.713	144.703	202.708	58.5094	43.7505	45.88	37.4202	37.1175	83.6836	43.6744	49.0704	40.5383
ENSGALG00000002107		ENSGALT00000003289	GO:0005813(centrosome);GO:0046604(positive regulation of mitotic centrosome separation);GO:0007051(spindle organization);GO:0046907(intracellular transport);GO:0006405(RNA export from nucleus);GO:0008536(Ran GTPase binding);GO:0000082(G1/S transition of mitotic cell cycle);GO:0006511(ubiquitin-dependent protein catabolic process);GO:0006606(protein import into nucleus);GO:0005096(GTPase activator…	NA	NA	NA		104.602	94.2314	106.007	28.5969	28.5336	21.0379	15.9075	18.0303	9.66132	5.49267	6.46046	8.33202	7.35327	15.3136	9.63293	9.01669	9.16935
ENSGALG00000037625		ENSGALT00000057924;ENSGALT00000078817	NA	NA	NA	NA		169.183	132.263	143.784	46.9965	49.5248	16.1445	17.4949	16.9113	4.76387	2.16396	3.4909	2.54459	1.23622	1.9726	0.70485	0.216652	2.34153
ENSGALG00000004437	LHFPL2	ENSGALT00000007061	GO:0016021(integral component of membrane);GO:0016020(membrane);GO:0046545(development of primary female sexual characteristics);GO:0046546(development of primary male sexual characteristics);GO:1905516(positive regulation of fertilization)	NA	NA	NA	LHFPL tetraspan subfamily member 2 [Source:HGNC Symbol;Acc:HGNC:6588]	34.5426	34.8229	35.0805	23.5439	20.2081	15.9229	13.8448	10.865	3.61129	4.1018	4.30671	4.0493	4.36698	3.64749	2.71646	3.86407	3.52277
ENSGALG00000000313	TNNI1	ENSGALT00000000419	GO:0060048(cardiac muscle contraction);GO:0005861(troponin complex);GO:0055010(ventricular cardiac muscle tissue morphogenesis);GO:0014883(transition between fast and slow fiber);GO:0003009(skeletal muscle contraction)	NA	NA	NA	troponin I1, slow skeletal type [Source:HGNC Symbol;Acc:HGNC:11945]	454.187	669.946	506.632	343.52	304.413	28.0304	11.2158	45.6542	1.05589	0.586154	3.72771	1.8903	0.252068	5.32674	0.505501	0.404526	0.412438
ENSGALG00000000172	MYOG	ENSGALT00000040709	GO:0032993(protein-DNA complex);GO:0005667(transcription factor complex);GO:1901741(positive regulation of myoblast fusion);GO:1901739(regulation of myoblast fusion);GO:0071392(cellular response to estradiol stimulus);GO:0071158(positive regulation of cell cycle arrest);GO:0048743(positive regulation of skeletal muscle fiber development);GO:0045944(positive regulation of transcription from RNA po…	NA	NA	NA	Myogenin [Source:UniProtKB/Swiss-Prot;Acc:P17920]	50.452	44.832	54.4538	21.9611	20.2272	3.95742	4.48001	5.33336	6.51398	2.95831	6.75836	3.96687	2.95249	5.10256	0.763607	1.01767	1.95416
ENSGALG00000016592	PRPS2	ENSGALT00000052147;ENSGALT00000026780	GO:0009165(nucleotide biosynthetic process);GO:0070062(extracellular exosome);GO:0006015(5-phosphoribose 1-diphosphate biosynthetic process);GO:0042802(identical protein binding);GO:0004749(ribose phosphate diphosphokinase activity);GO:0044249(cellular biosynthetic process);GO:0009156(ribonucleoside monophosphate biosynthetic process);GO:0042803(protein homodimerization activity);GO:0009116(nucle…	01200(Carbon metabolism);01230(Biosynthesis of amino acids);00030(Pentose phosphate pathway);00230(Purine metabolism);00230(Purine metabolism)	K00948	EC:2.7.6.1	phosphoribosyl pyrophosphate synthetase 2 [Source:HGNC Symbol;Acc:HGNC:9465]	95.3917	79.3104	103.234	141.657	154.638	87.3546	65.9358	71.7141	31.1805	16.9466	12.8161	8.60446	8.89752	4.30214	6.07229	9.79564	7.85843
ENSGALG00000015464	PTGFRN	ENSGALT00000024931	GO:0009986(cell surface);GO:0034389(lipid particle organization);GO:0016021(integral component of membrane);GO:0005886(plasma membrane)	NA	NA	NA	prostaglandin F2 receptor inhibitor [Source:HGNC Symbol;Acc:HGNC:9601]	76.7098	84.6105	77.998	57.8274	53.7702	27.8731	34.8637	30.8876	9.27096	9.87408	11.975	8.76971	11.9761	10.4961	5.90474	9.83038	11.9178
ENSGALG00000006934	PATZ1	ENSGALT00000011231;ENSGALT00000082485;ENSGALT00000065470	GO:0005654(nucleoplasm);GO:0005634(nucleus);GO:0045944(positive regulation of transcription from RNA polymerase II promoter);GO:0045893(positive regulation of transcription, DNA-templated);GO:0030217(T cell differentiation);GO:0010468(regulation of gene expression);GO:0008584(male gonad development);GO:0007283(spermatogenesis);GO:0006355(regulation of transcription, DNA-templated);GO:0003682(chro…	NA	NA	NA	POZ/BTB and AT hook containing zinc finger 1 [Source:HGNC Symbol;Acc:HGNC:13071]	13.4051	13.4707	16.8731	10.1651	9.31446	5.20764	6.10741	5.16668	1.06157	0.696201	0.722532	0.450681	0.634628	1.32861	0.398251	0.716285	0.557073
ENSGALG00000011623	ADAMTS3	ENSGALT00000075190;ENSGALT00000018988;ENSGALT00000048655	GO:0008233(peptidase activity);GO:0008237(metallopeptidase activity);GO:0004222(metalloendopeptidase activity);GO:0006508(proteolysis);GO:0046872(metal ion binding);GO:0008270(zinc ion binding);GO:0070062(extracellular exosome);GO:0005615(extracellular space);GO:0004175(endopeptidase activity);GO:0016485(protein processing);GO:0010573(vascular endothelial growth factor production);GO:0032964(coll…	NA	NA	NA	ADAM metallopeptidase with thrombospondin type 1 motif 3 [Source:HGNC Symbol;Acc:HGNC:219]	13.9105	13.1501	9.76344	6.74362	8.69288	5.7218	6.55929	7.64033	1.19648	1.31099	1.57221	1.56809	0.972914	1.77642	0.524041	0.346847	0.672247
ENSGALG00000042686		ENSGALT00000079896	NA	NA	NA	NA		32.9327	40.2136	32.6991	64.2396	53.0053	40.9987	59.4813	46.7691	15.0334	13.4272	16.6262	7.91563	5.74327	5.58888	2.81245	4.72182	2.32899
ENSGALG00000037371	TMEM65	ENSGALT00000055160	GO:0016021(integral component of membrane);GO:0016020(membrane);GO:0003231(cardiac ventricle development);GO:1903779(regulation of cardiac conduction);GO:0005739(mitochondrion);GO:0005886(plasma membrane);GO:0014704(intercalated disc);GO:0005743(mitochondrial inner membrane)	NA	NA	NA	transmembrane protein 65 [Source:HGNC Symbol;Acc:HGNC:25203]	44.8106	40.9549	36.6084	32.9339	29.6258	42.3144	30.0955	33.2184	8.66903	6.48691	5.77234	6.89679	6.15399	5.4391	6.48821	5.47321	4.85501
ENSGALG00000000242	EBF2	ENSGALT00000000321	GO:0060612(adipose tissue development);GO:0045944(positive regulation of transcription from RNA polymerase II promoter);GO:0045893(positive regulation of transcription, DNA-templated);GO:0035563(positive regulation of chromatin binding);GO:0001709(cell fate determination);GO:0003682(chromatin binding);GO:0003677(DNA binding);GO:0001077(transcriptional activator activity, RNA polymerase II core pr…	NA	NA	NA	early B-cell factor 2 [Source:HGNC Symbol;Acc:HGNC:19090]	56.6645	38.8255	43.0302	29.2885	22.401	13.2666	21.1376	16.711	6.28564	5.66028	5.30869	6.57271	5.19469	4.48971	3.67253	5.03705	3.14683
ENSGALG00000009421	SRSF5	ENSGALT00000015342	GO:0005829(cytosol);GO:0005730(nucleolus);GO:0005634(nucleus);GO:0003723(RNA binding);GO:0003676(nucleic acid binding)	03040(Spliceosome);05168(Herpes simplex infection)	K12893	NA	serine and arginine rich splicing factor 5 [Source:HGNC Symbol;Acc:HGNC:10787]	71.5786	76.0993	82.5311	56.3041	55.1819	27.3186	47.4084	30.4368	9.11825	7.65736	3.71366	7.69106	4.47215	5.58323	5.4497	2.99973	3.02054
ENSGALG00000012017	DAAM1	ENSGALT00000085861;ENSGALT00000019608	GO:0001725(stress fiber);GO:0031514(motile cilium);GO:0042802(identical protein binding);GO:0036064(ciliary basal body);GO:0016020(membrane);GO:0005829(cytosol);GO:0005886(plasma membrane);GO:0016043(cellular component organization);GO:0017048(Rho GTPase binding);GO:0030036(actin cytoskeleton organization);GO:0003779(actin binding);GO:0003779(actin binding)	04310(Wnt signaling pathway);04310(Wnt signaling pathway)	K04512	NA	dishevelled associated activator of morphogenesis 1 [Source:HGNC Symbol;Acc:HGNC:18142]	27.777	29.7537	27.5596	17.6714	14.7328	7.36578	7.34724	7.74353	3.66534	2.93506	3.17571	4.16053	4.25229	2.81283	3.17812	4.02696	1.93345
ENSGALG00000027534	GM2A	ENSGALT00000044457	GO:0006689(ganglioside catabolic process);GO:0008047(enzyme activator activity);GO:0043085(positive regulation of catalytic activity);GO:0004563(beta-N-acetylhexosaminidase activity);GO:0007611(learning or memory);GO:0009313(oligosaccharide catabolic process);GO:0019915(lipid storage);GO:0050877(nervous system process);GO:0050885(neuromuscular process controlling balance);GO:0005739(mitochondrion…	NA	NA	NA	GM2 ganglioside activator [Source:HGNC Symbol;Acc:HGNC:4367]	51.155	33.8473	31.2862	33.1872	32.6912	8.28173	14.3925	11.9273	3.04948	2.02646	3.4877	4.05343	4.32306	6.10978	2.26084	3.39661	2.91407
ENSGALG00000016575	GPM6B	ENSGALT00000051041;ENSGALT00000047331;ENSGALT00000046627;ENSGALT00000083351;ENSGALT00000080627;ENSGALT00000062943;ENSGALT00000026753	GO:0016021(integral component of membrane);GO:0016020(membrane);GO:0032956(regulation of actin cytoskeleton organization);GO:0030501(positive regulation of bone mineralization);GO:0051893(regulation of focal adhesion assembly);GO:0085029(extracellular matrix assembly);GO:0085029(extracellular matrix assembly)	NA	NA	NA	glycoprotein M6B [Source:HGNC Symbol;Acc:HGNC:4461]	58.3681	42.7898	66.0645	28.6521	20.6815	20.8603	13.2284	21.5371	9.04883	5.6372	5.97067	4.86568	4.1871	5.27429	6.96145	6.28003	6.84994
ENSGALG00000016375	PHEX	ENSGALT00000026410	GO:0048471(perinuclear region of cytoplasm);GO:0005794(Golgi apparatus);GO:0005783(endoplasmic reticulum);GO:0030282(bone mineralization);GO:0019637(organophosphate metabolic process);GO:0006508(proteolysis);GO:0008237(metallopeptidase activity);GO:0004222(metalloendopeptidase activity);GO:0016021(integral component of membrane);GO:0016020(membrane)	NA	NA	NA	phosphate regulating endopeptidase homolog, X-linked [Source:RefSeq peptide;Acc:NP_001186206]	16.2475	11.5326	14.476	5.22511	5.52721	1.7955	3.25561	3.52504	0.611754	0.542433	1.1352	0.450254	0.286665	0.142012	0.125277	0.301724	0.16738
ENSGALG00000000044	WFIKKN1	ENSGALT00000000059	GO:0005576(extracellular region);GO:0060021(palate development);GO:0048747(muscle fiber development);GO:0043392(negative regulation of DNA binding);GO:0032091(negative regulation of protein binding);GO:0001501(skeletal system development);GO:1900116(extracellular negative regulation of signal transduction);GO:0030414(peptidase inhibitor activity);GO:0010466(negative regulation of peptidase activi…	NA	NA	NA	WAP, follistatin/kazal, immunoglobulin, kunitz and netrin domain containing 1 [Source:HGNC Symbol;Acc:HGNC:30912]	6.11193	6.35768	4.62443	14.6515	17.8971	0.421799	0.575929	0.36253	0.030604	0	0	0	0	0.120187	0	0	0.018371
ENSGALG00000042136	PKHD1	ENSGALT00000069714	GO:0005813(centrosome);GO:0008284(positive regulation of cell proliferation);GO:0006874(cellular calcium ion homeostasis);GO:0070372(regulation of ERK1 and ERK2 cascade);GO:0036064(ciliary basal body);GO:0048471(perinuclear region of cytoplasm);GO:0043066(negative regulation of apoptotic process);GO:0051898(negative regulation of protein kinase B signaling);GO:0032006(regulation of TOR signaling)…	NA	NA	NA	PKHD1, fibrocystin/polyductin [Source:HGNC Symbol;Acc:HGNC:9016]	2.0644	1.63737	1.72002	0.68973	0.626089	0.069906	0.035045	0.034067	0.202739	0.119211	0.122744	0.044951	0.030879	0.057013	0.029004	0.003906	0.02565
ENSGALG00000006563	SEMA3D	ENSGALT00000010596	GO:0038191(neuropilin binding);GO:0007399(nervous system development);GO:0030154(cell differentiation);GO:0007275(multicellular organism development);GO:0005576(extracellular region);GO:0005615(extracellular space);GO:0050919(negative chemotaxis)	NA	NA	NA	semaphorin 3D [Source:HGNC Symbol;Acc:HGNC:10726]	50.5633	32.1677	39.285	27.2441	24.7681	21.124	25.4113	20.8574	3.52662	3.9479	5.79572	6.06343	2.78027	3.42542	1.93994	3.07738	2.6626
ENSGALG00000007131		ENSGALT00000011553	GO:0031492(nucleosomal DNA binding);GO:0000785(chromatin);GO:0005634(nucleus);GO:0003677(DNA binding)	NA	NA	NA	Non-histone chromosomal protein HMG-14A [Source:UniProtKB/Swiss-Prot;Acc:P12902]	221.272	228.796	252.93	59.3366	69.2086	75.1616	38.6212	62.9889	30.8437	19.1032	16.2028	16.8131	15.6051	21.8861	10.4787	20.2045	10.3766
ENSGALG00000043596	SNED1	ENSGALT00000050723	GO:0070062(extracellular exosome)	NA	NA	NA	sushi, nidogen and EGF like domains 1 [Source:HGNC Symbol;Acc:HGNC:24696]	20.733	19.9553	18.8744	13.5349	12.5002	6.81327	7.86848	7.01614	2.073	1.32768	1.75681	1.41949	1.85825	2.38168	1.33017	2.40155	2.69107
ENSGALG00000006964		ENSGALT00000011282	GO:0003854(3-beta-hydroxy-delta5-steroid dehydrogenase activity);GO:0006694(steroid biosynthetic process);GO:0016616(oxidoreductase activity, acting on the CH-OH group of donors, NAD or NADP as acceptor);GO:0055114(oxidation-reduction process);GO:0016021(integral component of membrane);GO:0016020(membrane)	NA	NA	NA		6.05265	8.10043	6.481	41.7518	35.0747	0.724067	0.52254	0.62892	0.230708	0.161496	0	0.080467	0.053428	0.006393	0.047385	0	0
ENSGALG00000007683		ENSGALT00000012454;ENSGALT00000078719	GO:0005847(mRNA cleavage and polyadenylation specificity factor complex);GO:0098789(pre-mRNA cleavage required for polyadenylation);GO:0006378(mRNA polyadenylation);GO:0003723(RNA binding);GO:0003723(RNA binding)	NA	NA	NA		75.3147	81.44	86.38	38.4364	37.5694	29.1796	31.7629	28.5943	11.5066	9.47744	7.69893	10.7021	10.243	16.0915	11.1698	11.3092	9.33591
ENSGALG00000033344		ENSGALT00000051591	NA	NA	NA	NA		35.725	30.3666	32.8716	8.04669	11.4382	4.99751	4.29932	4.70046	3.65571	1.70326	1.54373	1.5017	1.00416	0.835656	1.91655	1.03933	0.759583
ENSGALG00000001183		ENSGALT00000049815;ENSGALT00000046692;ENSGALT00000023397;ENSGALT00000064448	GO:0016459(myosin complex);GO:0003774(motor activity);GO:0051015(actin filament binding);GO:0003779(actin binding);GO:0005524(ATP binding);GO:0000166(nucleotide binding);GO:0000281(mitotic cytokinesis);GO:0001764(neuron migration);GO:0001778(plasma membrane repair);GO:0003279(cardiac septum development);GO:0006887(exocytosis);GO:0006930(substrate-dependent cell migration, cell extension);GO:00070…	04530(Tight junction);04530(Tight junction)	K10352	NA		39.6372	54.8988	58.2462	18.2321	25.5422	21.7457	19.2753	17.4614	5.99192	4.08462	4.65683	3.50423	2.83418	4.94218	5.62532	4.26794	8.41378
ENSGALG00000009426		ENSGALT00000038630	GO:0048264(determination of ventral identity);GO:0035091(phosphatidylinositol binding);GO:0035556(intracellular signal transduction);GO:0016020(membrane);GO:0005622(intracellular)	NA	NA	NA		49.3722	42.436	43.7498	20.8222	22.1385	13.8058	14.652	14.1334	7.52283	6.86688	6.4733	7.78282	7.85909	8.3834	9.35869	9.44049	8.09553
ENSGALG00000034109	GRIA3	ENSGALT00000055549;ENSGALT00000049874	GO:0016020(membrane);GO:0045211(postsynaptic membrane);GO:0032281(AMPA glutamate receptor complex);GO:0004971(AMPA glutamate receptor activity);GO:0004971(AMPA glutamate receptor activity)	04080(Neuroactive ligand-receptor interaction);04080(Neuroactive ligand-receptor interaction)	K05199	NA	glutamate ionotropic receptor AMPA type subunit 3 [Source:HGNC Symbol;Acc:HGNC:4573]	25.2369	15.3594	15.9127	1.66085	1.67461	0.364311	0.925936	1.23282	0.418811	0.464537	0.377042	1.01283	0.931155	0.878414	0.0458725	0.315217	0.383565
ENSGALG00000005330	SNCAIP	ENSGALT00000058340;ENSGALT00000008552	GO:0042802(identical protein binding);GO:0005737(cytoplasm);GO:0031625(ubiquitin protein ligase binding);GO:0005654(nucleoplasm);GO:0042417(dopamine metabolic process);GO:0008219(cell death);GO:0046928(regulation of neurotransmitter secretion);GO:0090083(regulation of inclusion body assembly);GO:0036464(cytoplasmic ribonucleoprotein granule);GO:0036464(cytoplasmic ribonucleoprotein granule)	NA	NA	NA	synuclein alpha interacting protein [Source:HGNC Symbol;Acc:HGNC:11139]	23.7394	23.7898	32.5919	24.8883	17.9193	8.92066	6.35169	5.37978	3.42175	1.9596	3.10577	1.01574	1.74577	2.13011	1.40105	2.40988	1.22643
ENSGALG00000010902	CERS6	ENSGALT00000017733	GO:0016020(membrane);GO:0050291(sphingosine N-acyltransferase activity);GO:0046513(ceramide biosynthetic process);GO:0005783(endoplasmic reticulum);GO:0005634(nucleus);GO:0003677(DNA binding);GO:0016021(integral component of membrane)	NA	NA	NA	ceramide synthase 6 [Source:HGNC Symbol;Acc:HGNC:23826]	24.8975	17.7059	21.7306	7.72593	6.37671	1.2138	0.672805	0.89869	0.38253	0.81953	0.970404	1.50346	0.742969	1.35873	0.899128	1.36823	1.04708
ENSGALG00000004559	DPY19L3	ENSGALT00000007256	GO:0005637(nuclear inner membrane);GO:0000030(mannosyltransferase activity);GO:0018406(protein C-linked glycosylation via 2'-alpha-mannosyl-L-tryptophan);GO:0016021(integral component of membrane);GO:0016020(membrane)	NA	NA	NA	dpy-19 like C-mannosyltransferase 3 [Source:HGNC Symbol;Acc:HGNC:27120]	29.9067	30.2592	34.104	22.5459	20.9203	13.9016	11.0836	15.4011	5.84385	3.72829	3.5515	3.46527	2.91763	3.69114	3.22981	3.17309	1.99332
ENSGALG00000043234	HBAA	ENSGALT00000084384;ENSGALT00000075828	GO:0005833(hemoglobin complex);GO:0015671(oxygen transport);GO:0005344(oxygen carrier activity);GO:0019825(oxygen binding);GO:0020037(heme binding);GO:0006810(transport);GO:0005506(iron ion binding);GO:0046872(metal ion binding);GO:0005615(extracellular space);GO:0005615(extracellular space)	NA	NA	NA	Hemoglobin subunit alpha-A [Source:UniProtKB/Swiss-Prot;Acc:P01994]	406.997	483.263	345.57	540.905	404.081	190.382	249.752	148.852	84.699	58.6751	93.7843	12.8117	14.1598	33.7561	33.6121	20.1353	30.4639
ENSGALG00000005476	PTH1R	ENSGALT00000008796;ENSGALT00000065681	GO:0070062(extracellular exosome);GO:0005887(integral component of plasma membrane);GO:0005622(intracellular);GO:0048469(cell maturation);GO:0045453(bone resorption);GO:0030282(bone mineralization);GO:0008285(negative regulation of cell proliferation);GO:0008284(positive regulation of cell proliferation);GO:0007200(phospholipase C-activating G-protein coupled receptor signaling pathway);GO:000718…	04080(Neuroactive ligand-receptor interaction);04080(Neuroactive ligand-receptor interaction)	K04585	NA	parathyroid hormone 1 receptor [Source:HGNC Symbol;Acc:HGNC:9608]	16.8678	9.65637	9.7662	9.20164	9.82228	1.85409	1.71556	2.46271	0.839377	0.701869	0.862327	0.905483	0.778137	1.10479	0.584009	0.810915	0.45302
ENSGALG00000015554	SORCS2	ENSGALT00000054591;ENSGALT00000052935;ENSGALT00000068803;ENSGALT00000025078	GO:0016021(integral component of membrane);GO:0016020(membrane);GO:0016020(membrane)	NA	NA	NA	sortilin related VPS10 domain containing receptor 2 [Source:HGNC Symbol;Acc:HGNC:16698]	55.7308	53.715	55.8822	33.8589	29.9364	19.1177	16.4994	16.92	7.87082	7.06074	9.57061	6.81731	5.49228	3.91501	4.961	9.21734	7.61756
ENSGALG00000005797	COL20A1	ENSGALT00000009312	NA	NA	NA	NA	collagen type XX alpha 1 chain [Source:HGNC Symbol;Acc:HGNC:14670]	156.367	189.369	156.326	252.021	244.37	25.3261	40.4322	36.2096	10.1224	7.50436	11.254	4.93445	4.16574	1.69718	0.640475	1.61981	5.24474
ENSGALG00000036949	ASAP3	ENSGALT00000055607	GO:0016477(cell migration);GO:0043547(positive regulation of GTPase activity);GO:0001726(ruffle);GO:0005925(focal adhesion);GO:0005096(GTPase activator activity);GO:0005654(nucleoplasm);GO:0005829(cytosol);GO:0043231(intracellular membrane-bounded organelle);GO:0051492(regulation of stress fiber assembly)	NA	NA	NA	ArfGAP with SH3 domain, ankyrin repeat and PH domain 3 [Source:HGNC Symbol;Acc:HGNC:14987]	34.5141	37.3541	37.5602	20.5498	19.798	9.37496	14.5886	11.0919	3.38781	1.70713	3.72733	4.7045	3.32602	3.78288	0.642158	1.65938	1.2998
ENSGALG00000038242	CACNA2D2	ENSGALT00000079627;ENSGALT00000054431	GO:0007528(neuromuscular junction development);GO:0046622(positive regulation of organ growth);GO:0005245(voltage-gated calcium channel activity);GO:0040014(regulation of multicellular organism growth);GO:0048747(muscle fiber development);GO:0060024(rhythmic synaptic transmission);GO:0005891(voltage-gated calcium channel complex);GO:0005891(voltage-gated calcium channel complex)	04010(MAPK signaling pathway);04260(Cardiac muscle contraction);04261(Adrenergic signaling in cardiomyocytes);04261(Adrenergic signaling in cardiomyocytes)	K04859	NA	calcium voltage-gated channel auxiliary subunit alpha2delta 2 [Source:HGNC Symbol;Acc:HGNC:1400]	15.1582	17.5578	19.3384	15.3021	17.718	10.0846	15.2066	14.5309	3.18989	4.02598	3.59388	2.29016	3.18164	1.76715	1.6626	1.71509	1.77293
ENSGALG00000001968	SYT6	ENSGALT00000003058	GO:0097038(perinuclear endoplasmic reticulum);GO:0016021(integral component of membrane);GO:0060478(acrosomal vesicle exocytosis);GO:0007340(acrosome reaction);GO:0048306(calcium-dependent protein binding);GO:0042803(protein homodimerization activity);GO:0042802(identical protein binding);GO:0030276(clathrin binding);GO:0019905(syntaxin binding);GO:0005544(calcium-dependent phospholipid binding);…	NA	NA	NA	synaptotagmin 6 [Source:HGNC Symbol;Acc:HGNC:18638]	17.2744	14.4421	13.4214	8.29356	8.36636	5.49248	6.32626	4.38707	1.2283	1.20002	1.08697	0.875524	0.629961	0.392466	0.436772	0.624869	0.324463
ENSGALG00000001475		ENSGALT00000068150;ENSGALT00000068880;ENSGALT00000063239;ENSGALT00000083476;ENSGALT00000002237;ENSGALT00000084445;ENSGALT00000087509	GO:0031110(regulation of microtubule polymerization or depolymerization);GO:0015631(tubulin binding);GO:0051493(regulation of cytoskeleton organization);GO:0007019(microtubule depolymerization);GO:0005515(protein binding);GO:0031175(neuron projection development);GO:0005856(cytoskeleton);GO:0043005(neuron projection);GO:0005874(microtubule);GO:0005737(cytoplasm);GO:0005737(cytoplasm)	04010(MAPK signaling pathway);04010(MAPK signaling pathway)	K04381	NA	Stathmin [Source:UniProtKB/Swiss-Prot;Acc:P31395]	151.106	182.875	177.907	68.1075	64.9649	20.3359	12.6127	20.1924	13.4082	5.68617	4.08786	2.46695	4.52281	8.86431	2.35021	5.37249	2.14626
ENSGALG00000041693		ENSGALT00000076697;ENSGALT00000056997	NA	NA	NA	NA		14.9375	8.37939	11.9398	6.78637	4.16924	0.445669	0.200457	0.649344	0.0564205	0.122337	0.113046	0	0.0878126	0.0564398	0.0507077	0.169042	0.25177
ENSGALG00000000761	TSKU	ENSGALT00000001106	GO:0005615(extracellular space);GO:0061073(ciliary body morphogenesis);GO:0043010(camera-type eye development);GO:0030178(negative regulation of Wnt signaling pathway);GO:0021960(anterior commissure morphogenesis);GO:0021670(lateral ventricle development);GO:0021540(corpus callosum morphogenesis);GO:0010468(regulation of gene expression);GO:0007188(adenylate cyclase-modulating G-protein coupled r…	NA	NA	NA	Tsukushin [Source:UniProtKB/Swiss-Prot;Acc:Q65Z91]	44.4615	38.9243	42.0306	14.4509	14.2444	8.27254	9.48992	8.76529	2.61743	2.7818	4.94389	5.05916	3.69426	7.15962	2.00692	3.13975	3.20158
ENSGALG00000036111	ITM2C	ENSGALT00000049937	GO:0010977(negative regulation of neuron projection development);GO:0048471(perinuclear region of cytoplasm);GO:0005764(lysosome);GO:0005886(plasma membrane);GO:0030182(neuron differentiation);GO:0070062(extracellular exosome);GO:0005524(ATP binding);GO:2001238(positive regulation of extrinsic apoptotic signaling pathway);GO:0005794(Golgi apparatus);GO:0001540(amyloid-beta binding)	NA	NA	NA	integral membrane protein 2C [Source:RefSeq peptide;Acc:NP_001264347]	15.8461	10.2486	16.2428	9.11377	9.71566	5.4448	5.73395	6.23257	1.64689	1.3005	1.10277	0.785667	0.902842	1.43731	0.830859	0.85289	1.34952
ENSGALG00000032937	DLGAP2	ENSGALT00000055809;ENSGALT00000056309	NA	NA	NA	NA	DLG associated protein 2 [Source:HGNC Symbol;Acc:HGNC:2906]	9.59482	9.20927	13.0746	4.02048	3.89767	1.60098	1.4761	2.49517	0.388803	0.224026	0.218488	0.119293	0.502545	0.145413	0.22888	0.122751	0.205397
ENSGALG00000016967	ENOX1	ENSGALT00000027419;ENSGALT00000061002	GO:0005886(plasma membrane);GO:0003723(RNA binding);GO:0003676(nucleic acid binding);GO:0003676(nucleic acid binding)	NA	NA	NA	ecto-NOX disulfide-thiol exchanger 1 [Source:HGNC Symbol;Acc:HGNC:25474]	13.1693	9.9726	11.039	11.4031	9.95065	5.33558	5.08561	5.15213	1.71207	1.21272	0.991851	1.25147	0.991849	1.40439	0.660697	1.04724	1.03585
ENSGALG00000005597	CNN3	ENSGALT00000084402;ENSGALT00000084992;ENSGALT00000039077;ENSGALT00000066257;ENSGALT00000088788;ENSGALT00000087490	GO:0015629(actin cytoskeleton);GO:0005925(focal adhesion);GO:0005913(cell-cell adherens junction);GO:0098609(cell-cell adhesion);GO:0005829(cytosol);GO:0031032(actomyosin structure organization);GO:0030855(epithelial cell differentiation);GO:0098641(cadherin binding involved in cell-cell adhesion);GO:0005516(calmodulin binding);GO:0003779(actin binding);GO:0003779(actin binding)	00510(N-Glycan biosynthesis);00510(N-Glycan biosynthesis)	K07441	EC:2.4.1.141	calponin 3 [Source:HGNC Symbol;Acc:HGNC:2157]	210.482	172.929	177.38	111.307	102.321	73.5853	71.2081	79.421	30.4418	24.8956	18.9474	31.427	24.3466	21.7773	36.4711	35.0693	30.8186
ENSGALG00000002831	SH3PXD2B	ENSGALT00000004469;ENSGALT00000055326;ENSGALT00000061567;ENSGALT00000075143;ENSGALT00000050081	GO:0002102(podosome);GO:0080025(phosphatidylinositol-3,5-bisphosphate binding);GO:0032266(phosphatidylinositol-3-phosphate binding);GO:0051496(positive regulation of stress fiber assembly);GO:0048705(skeletal system morphogenesis);GO:0007507(heart development);GO:0010628(positive regulation of gene expression);GO:0005737(cytoplasm);GO:0001654(eye development);GO:0010314(phosphatidylinositol-5-pho…	NA	NA	NA	SH3 and PX domains 2B [Source:HGNC Symbol;Acc:HGNC:29242]	39.2938	42.0832	40.9503	26.5181	21.6632	12.1857	19.4315	13.3483	3.25475	2.25118	3.54694	3.01268	2.20802	6.31214	1.82592	2.6921	2.15853
ENSGALG00000031947	FBXL7	ENSGALT00000057966	GO:0000086(G2/M transition of mitotic cell cycle);GO:0005813(centrosome);GO:0019005(SCF ubiquitin ligase complex);GO:0008283(cell proliferation);GO:0016567(protein ubiquitination);GO:0000278(mitotic cell cycle);GO:0031146(SCF-dependent proteasomal ubiquitin-dependent protein catabolic process)	NA	NA	NA	F-box and leucine rich repeat protein 7 [Source:HGNC Symbol;Acc:HGNC:13604]	24.7405	25.1412	27.9842	14.4368	12.6078	4.48897	6.38059	5.9507	1.9423	2.19312	2.79282	1.90857	2.09276	2.65373	1.58351	2.01808	2.75001
ENSGALG00000011493	TMEM169	ENSGALT00000038136	GO:0016021(integral component of membrane);GO:0016020(membrane)	NA	NA	NA	transmembrane protein 169 [Source:HGNC Symbol;Acc:HGNC:25130]	43.372	44.9733	46.4779	11.0008	12.8758	7.86032	7.27504	6.51579	6.52858	2.87714	3.53089	2.13333	2.81938	2.11288	3.22678	2.0272	1.39776
ENSGALG00000009476	CDK6	ENSGALT00000015428	GO:0010389(regulation of G2/M transition of mitotic cell cycle);GO:0010033(response to organic substance);GO:0008284(positive regulation of cell proliferation);GO:0000307(cyclin-dependent protein kinase holoenzyme complex);GO:0000082(G1/S transition of mitotic cell cycle);GO:0042127(regulation of cell proliferation);GO:0010468(regulation of gene expression);GO:0030332(cyclin binding);GO:0004693(c…	04110(Cell cycle);04115(p53 signaling pathway);04218(Cellular senescence)	K02091	EC:2.7.11.22	cyclin dependent kinase 6 [Source:HGNC Symbol;Acc:HGNC:1777]	46.5397	45.4286	45.0557	38.5092	37.6365	31.4142	24.6948	31.0639	10.1121	7.26475	6.2184	7.72741	8.17184	8.20292	6.45506	6.58715	4.25169
ENSGALG00000042215	FAAP100	ENSGALT00000069065	NA	03460(Fanconi anemia pathway)	K10993	NA	Fanconi anemia core complex associated protein 100 [Source:HGNC Symbol;Acc:HGNC:26171]	22.3279	23.692	21.0596	21.007	23.3768	20.0364	23.7897	18.1126	4.95216	4.96516	3.21925	2.57083	2.57003	3.88168	2.9293	3.25032	2.16959
ENSGALG00000002546	COL5A1	ENSGALT00000059123;ENSGALT00000004020	GO:0016477(cell migration);GO:0097435(supramolecular fiber organization);GO:0031012(extracellular matrix);GO:0008201(heparin binding);GO:0007155(cell adhesion);GO:0070062(extracellular exosome);GO:0043588(skin development);GO:0005578(proteinaceous extracellular matrix);GO:0005615(extracellular space);GO:0030199(collagen fibril organization);GO:0001568(blood vessel development);GO:0005604(basement…	NA	NA	NA	collagen type V alpha 1 chain [Source:HGNC Symbol;Acc:HGNC:2209]	429.602	455.614	443.057	592.778	580.903	175.266	235.337	194.123	50.8597	40.7657	70.049	64.2531	48.9823	39.954	24.6877	42.5721	61.3688
ENSGALG00000038226		ENSGALT00000072761	NA	NA	NA	NA		64.4595	49.4253	48.2829	58.5367	66.9969	56.4547	38.6335	37.6528	7.71179	6.57716	4.71861	3.82516	3.15018	8.231	5.58549	5.47305	5.03749
ENSGALG00000004304	TCF12	ENSGALT00000083293;ENSGALT00000085813;ENSGALT00000006988;ENSGALT00000034417	GO:0090575(RNA polymerase II transcription factor complex);GO:0043231(intracellular membrane-bounded organelle);GO:0016607(nuclear speck);GO:0005737(cytoplasm);GO:0005667(transcription factor complex);GO:0005654(nucleoplasm);GO:0005634(nucleus);GO:0000790(nuclear chromatin);GO:0045944(positive regulation of transcription from RNA polymerase II promoter);GO:0045893(positive regulation of transcrip…	NA	NA	NA	transcription factor 12 [Source:HGNC Symbol;Acc:HGNC:11623]	148.129	147.785	148.392	65.353	67.6134	49.1946	41.1211	44.899	22.7141	18.7382	15.2949	17.5572	15.0852	17.4855	31.7543	19.2561	19.8033
ENSGALG00000038154	YAP1	ENSGALT00000058242;ENSGALT00000067239	GO:0005634(nucleus);GO:0044212(transcription regulatory region DNA binding);GO:0008283(cell proliferation);GO:0003713(transcription coactivator activity);GO:0006974(cellular response to DNA damage stimulus);GO:0005737(cytoplasm);GO:0046982(protein heterodimerization activity);GO:0045944(positive regulation of transcription from RNA polymerase II promoter);GO:0016020(membrane);GO:0005829(cytosol);…	NA	NA	NA	transcriptional coactivator YAP1 [Source:RefSeq peptide;Acc:NP_990574]	79.4927	76.602	77.0351	37.9913	38.8982	25.6772	27.9019	27.4368	9.84864	11.0006	11.8833	7.32724	9.5541	11.9636	12.7903	10.3351	15.7223
ENSGALG00000033195	IGF2BP2	ENSGALT00000051196	NA	NA	NA	NA	insulin like growth factor 2 mRNA binding protein 2 [Source:HGNC Symbol;Acc:HGNC:28867]	61.1875	59.655	51.9747	47.2911	43.7196	41.5481	44.2757	52.3375	4.36821	6.34237	3.80001	4.43205	1.92162	6.41679	4.71891	2.37865	2.03525
ENSGALG00000016727	JADE3	ENSGALT00000026992	GO:0000123(histone acetyltransferase complex);GO:0043983(histone H4-K12 acetylation);GO:0043982(histone H4-K8 acetylation);GO:0043981(histone H4-K5 acetylation);GO:0043966(histone H3 acetylation);GO:0046872(metal ion binding)	NA	NA	NA	jade family PHD finger 3 [Source:HGNC Symbol;Acc:HGNC:22982]	49.6674	56.5246	53.9383	37.9408	35.3786	17.8143	16.1222	13.0843	5.98821	5.62327	5.51274	6.64196	6.20437	11.4791	9.3224	7.75596	9.82147
ENSGALG00000035210		ENSGALT00000053572	NA	NA	NA	NA		70.3223	101.1	56.5953	114.983	67.8509	17.3485	23.8456	13.389	7.1875	6.20228	5.51784	11.8435	6.9238	5.69665	7.56164	5.91388	5.58736
ENSGALG00000009458		ENSGALT00000015394	GO:0005509(calcium ion binding)	NA	NA	NA		6.73044	4.88766	5.04897	1.10567	0.527771	0.107719	0.072162	0.060776	0.024954	0.068029	0.071609	0.059226	0.105566	0.049599	0.033019	0	0.067379
ENSGALG00000039193	AGRN	ENSGALT00000065973;ENSGALT00000087506;ENSGALT00000049023;ENSGALT00000049138	GO:0031012(extracellular matrix);GO:0005829(cytosol);GO:0005886(plasma membrane);GO:0070062(extracellular exosome);GO:0043113(receptor clustering);GO:0005605(basal lamina);GO:0005605(basal lamina)	04512(ECM-receptor interaction);04512(ECM-receptor interaction)	K06254	NA	agrin [Source:HGNC Symbol;Acc:HGNC:329]	44.6773	42.3058	39.5627	64.0162	76.6624	24.8526	29.3674	24.6501	4.53477	4.87517	6.9281	4.23725	4.29402	7.07913	3.69199	7.77033	9.24587
ENSGALG00000012156	DPP10	ENSGALT00000053358;ENSGALT00000019852	GO:0008236(serine-type peptidase activity);GO:0006508(proteolysis);GO:0016021(integral component of membrane);GO:0016020(membrane);GO:0044325(ion channel binding);GO:1903078(positive regulation of protein localization to plasma membrane);GO:0008076(voltage-gated potassium channel complex);GO:0008076(voltage-gated potassium channel complex)	NA	NA	NA	dipeptidyl peptidase like 10 [Source:HGNC Symbol;Acc:HGNC:20823]	20.607	35.7551	33.1434	8.66912	13.0247	12.7985	7.11243	8.80946	2.78162	2.23319	1.94603	1.79667	2.09897	0.783911	1.12869	1.46857	0.773416
ENSGALG00000005762	BIRC7	ENSGALT00000009253	GO:0009966(regulation of signal transduction);GO:1990001(inhibition of cysteine-type endopeptidase activity involved in apoptotic process);GO:0043027(cysteine-type endopeptidase inhibitor activity involved in apoptotic process);GO:0006915(apoptotic process);GO:0004842(ubiquitin-protein transferase activity);GO:0016567(protein ubiquitination);GO:0005634(nucleus);GO:0005737(cytoplasm)	04120(Ubiquitin mediated proteolysis)	K16061	NA	baculoviral IAP repeat containing 7 [Source:HGNC Symbol;Acc:HGNC:13702]	10.0349	8.67447	10.4387	4.19847	5.74521	0.445314	0.661078	0.299773	0.514863	0.370283	0.218617	0.155718	0.110377	0.137727	0.329743	0.10678	0.294013
ENSGALG00000027907	NR2F1	ENSGALT00000033927;ENSGALT00000079644	GO:0005634(nucleus);GO:0000122(negative regulation of transcription from RNA polymerase II promoter);GO:0043565(sequence-specific DNA binding);GO:0003700(transcription factor activity, sequence-specific DNA binding);GO:0001078(transcriptional repressor activity, RNA polymerase II core promoter proximal region sequence-specific binding);GO:0000978(RNA polymerase II core promoter proximal region se…	NA	NA	NA	nuclear receptor subfamily 2 group F member 1 [Source:HGNC Symbol;Acc:HGNC:7975]	20.106	21.7172	19.4776	10.3161	9.17987	4.86735	6.61981	3.07615	0.631878	0.357429	0.676585	0.407498	0.230701	0.726533	0.62325	0.396134	0.150543
ENSGALG00000005519	TLL2	ENSGALT00000008855;ENSGALT00000061149	GO:0048632(negative regulation of skeletal muscle tissue growth);GO:0004222(metalloendopeptidase activity);GO:0008237(metallopeptidase activity);GO:0006508(proteolysis);GO:0016787(hydrolase activity);GO:0008233(peptidase activity);GO:0046872(metal ion binding);GO:0008270(zinc ion binding);GO:0005509(calcium ion binding);GO:0005509(calcium ion binding)	NA	NA	NA	tolloid like 2 [Source:HGNC Symbol;Acc:HGNC:11844]	31.4916	19.6608	30.5492	4.34892	4.69384	1.40465	1.84763	1.96535	1.39277	0.4861	0.30504	0.874549	0.930271	0.872237	0.286618	0.8124	0.178898
ENSGALG00000038405	CASR	ENSGALT00000055986	GO:0006874(cellular calcium ion homeostasis);GO:0005887(integral component of plasma membrane);GO:0042803(protein homodimerization activity);GO:0005509(calcium ion binding);GO:0007186(G-protein coupled receptor signaling pathway);GO:0004930(G-protein coupled receptor activity);GO:0010628(positive regulation of gene expression);GO:0016597(amino acid binding);GO:0005513(detection of calcium ion);GO…	04621(NOD-like receptor signaling pathway)	K04612	NA	calcium sensing receptor [Source:HGNC Symbol;Acc:HGNC:1514]	7.14389	12.7502	13.3505	6.38204	2.39025	1.12266	0.840344	0.674313	0.323773	0.478247	0.397831	0.08711	0.105901	0.310191	0.071241	0.235366	0.11402
ENSGALG00000008552	MAL	ENSGALT00000013930	GO:0045121(membrane raft);GO:0005783(endoplasmic reticulum);GO:0019911(structural constituent of myelin sheath);GO:0042552(myelination);GO:0008104(protein localization);GO:0001766(membrane raft polarization);GO:0016021(integral component of membrane);GO:0016020(membrane)	NA	NA	NA	myelin and lymphocyte protein [Source:RefSeq peptide;Acc:NP_001186320]	17.322	11.3148	14.6769	5.49488	3.96711	1.57992	1.97268	1.43149	0.60527	0.561311	0.453331	0.204539	0.422068	0.311778	0.52741	0.824847	0.279796
ENSGALG00000029072	NTN3	ENSGALT00000045108;ENSGALT00000054061	GO:0005576(extracellular region);GO:0005794(Golgi apparatus);GO:0005102(receptor binding);GO:0005102(receptor binding)	NA	NA	NA	netrin 3 [Source:HGNC Symbol;Acc:HGNC:8030]	14.5045	14.5978	12.5839	6.45213	7.4673	1.58549	2.11015	1.09146	0.483408	0.224973	0.535933	0.261617	0.974645	0.879644	0.171608	0.230463	0.401458
ENSGALG00000016276	KHDRBS2	ENSGALT00000026242	GO:0048024(regulation of mRNA splicing, via spliceosome);GO:0046982(protein heterodimerization activity);GO:0042802(identical protein binding);GO:0042169(SH2 domain binding);GO:0017124(SH3 domain binding);GO:0008266(poly(U) RNA binding);GO:0008143(poly(A) binding);GO:0003723(RNA binding);GO:0003676(nucleic acid binding)	NA	NA	NA	KH RNA binding domain containing, signal transduction associated 2 [Source:HGNC Symbol;Acc:HGNC:18114]	6.9245	7.62778	6.03685	0.965026	1.60987	1.33022	1.82716	1.44627	0.22204	0.112829	0.308867	0.055268	0.099157	0.172371	0.022706	0.021406	0.068501
ENSGALG00000014646	SYT11	ENSGALT00000086474;ENSGALT00000023607	GO:0055037(recycling endosome);GO:0045335(phagocytic vesicle);GO:0043005(neuron projection);GO:0032009(early phagosome);GO:0005887(integral component of plasma membrane);GO:0005764(lysosome);GO:0005737(cytoplasm);GO:0001891(phagocytic cup);GO:1990927(calcium ion regulated lysosome exocytosis);GO:1905171(positive regulation of protein localization to phagocytic vesicle);GO:1904468(negative regulat…	NA	NA	NA	synaptotagmin 11 [Source:HGNC Symbol;Acc:HGNC:19239]	35.8599	30.9443	33.6742	11.7611	15.0042	4.27454	7.28713	5.48749	1.09948	1.73528	1.54583	1.49313	1.04305	3.67812	1.53131	1.3316	0.94353
ENSGALG00000008681	NSMF	ENSGALT00000014129	GO:2001222(regulation of neuron migration);GO:0048168(regulation of neuronal synaptic plasticity);GO:0071371(cellular response to gonadotropin stimulus);GO:2001224(positive regulation of neuron migration);GO:0005634(nucleus);GO:0005654(nucleoplasm);GO:0005737(cytoplasm)	NA	NA	NA	NMDA receptor synaptonuclear signaling and neuronal migration factor [Source:HGNC Symbol;Acc:HGNC:29843]	35.1526	46.19	35.8182	10.9112	9.59285	8.21189	7.93988	9.55424	2.97642	2.90283	1.8219	3.97703	2.50485	2.14223	3.5501	3.23167	3.46299
ENSGALG00000046372		ENSGALT00000089021	NA	NA	NA	NA		14.7739	12.4396	11.6915	19.9788	14.0643	9.35246	17.6218	28.788	0	0.286132	0.026145	0.029038	0	0.06943	0	0	0.058156
ENSGALG00000002205	FBRSL1	ENSGALT00000003452	GO:0003723(RNA binding)	NA	NA	NA	fibrosin like 1 [Source:HGNC Symbol;Acc:HGNC:29308]	42.5523	50.5433	52.6841	33.6416	35.3373	18.521	23.6287	17.2898	6.0192	4.82443	4.91007	4.98213	3.71743	7.03311	6.67096	6.43987	3.30561
ENSGALG00000010103	FBXW7	ENSGALT00000048835;ENSGALT00000016428	GO:1990452(Parkin-FBXW7-Cul1 ubiquitin ligase complex);GO:0019005(SCF ubiquitin ligase complex);GO:0005737(cytoplasm);GO:2000060(positive regulation of protein ubiquitination involved in ubiquitin-dependent protein catabolic process);GO:1903955(positive regulation of protein targeting to mitochondrion);GO:1903378(positive regulation of oxidative stress-induced neuron intrinsic apoptotic signaling…	NA	NA	NA	F-box and WD repeat domain containing 7 [Source:HGNC Symbol;Acc:HGNC:16712]	30.0341	31.1346	33.6886	57.1442	52.2431	14.9878	14.3976	11.2304	9.47401	6.4989	4.6214	7.06449	4.10134	4.64126	4.49008	4.23283	3.37119
ENSGALG00000012222	RAP1GDS1	ENSGALT00000048242;ENSGALT00000019958;ENSGALT00000084151;ENSGALT00000067792;ENSGALT00000088734	GO:0070062(extracellular exosome);GO:0005829(cytosol);GO:0005783(endoplasmic reticulum);GO:0005739(mitochondrion);GO:0051561(positive regulation of mitochondrial calcium ion concentration);GO:0032471(negative regulation of endoplasmic reticulum calcium ion concentration);GO:0007264(small GTPase mediated signal transduction);GO:0043547(positive regulation of GTPase activity);GO:0043547(positive re…	NA	NA	NA	Rap1 GTPase-GDP dissociation stimulator 1 [Source:HGNC Symbol;Acc:HGNC:9859]	122.198	103.514	109.689	42.7634	42.3745	28.6902	21.333	27.7705	20.4967	17.6116	11.1521	14.3446	12.1078	18.6584	13.9812	11.2025	8.90623
ENSGALG00000009915	EML4	ENSGALT00000016124;ENSGALT00000053920;ENSGALT00000052372	GO:0015630(microtubule cytoskeleton);GO:0008017(microtubule binding);GO:0016020(membrane);GO:0016020(membrane)	NA	NA	NA	echinoderm microtubule associated protein like 4 [Source:HGNC Symbol;Acc:HGNC:1316]	122.925	115.028	118.49	46.2289	41.5957	33.3311	28.4225	25.51	17.104	16.2502	10.9328	8.26277	9.89388	14.6573	13.8316	17.3798	8.86516
ENSGALG00000007000	NR2F2	ENSGALT00000011332	GO:0045893(positive regulation of transcription, DNA-templated);GO:0004879(nuclear receptor activity);GO:0043401(steroid hormone mediated signaling pathway);GO:0030522(intracellular receptor signaling pathway);GO:0003707(steroid hormone receptor activity);GO:0043565(sequence-specific DNA binding);GO:0005634(nucleus);GO:0003700(transcription factor activity, sequence-specific DNA binding);GO:00063…	NA	NA	NA	nuclear receptor subfamily 2 group F member 2 [Source:HGNC Symbol;Acc:HGNC:7976]	102.052	86.0443	108.825	60.3922	72.1732	49.2899	55.2855	48.8142	10.5056	5.97688	11.42	14.1177	5.90387	9.41095	7.08012	10.1166	5.65521
ENSGALG00000009825	SRGAP1	ENSGALT00000015976;ENSGALT00000058753;ENSGALT00000076654	GO:0005096(GTPase activator activity);GO:0016477(cell migration);GO:0043547(positive regulation of GTPase activity);GO:0007266(Rho protein signal transduction);GO:0017048(Rho GTPase binding);GO:0005622(intracellular);GO:0007165(signal transduction);GO:0007165(signal transduction)	NA	NA	NA	SLIT-ROBO Rho GTPase activating protein 1 [Source:HGNC Symbol;Acc:HGNC:17382]	48.2951	48.4523	49.3775	24.0083	23.9507	9.34929	8.40352	9.12219	6.68857	4.97628	3.69453	8.07153	4.66554	6.58389	10.0283	7.01256	11.0122
ENSGALG00000043690	C2orf40	ENSGALT00000047217;ENSGALT00000087003	NA	NA	NA	NA	chromosome 2 open reading frame 40 [Source:HGNC Symbol;Acc:HGNC:24642]	79.5313	76.7295	75.5508	58.0327	73.2618	28.8359	31.7018	30.3614	5.31438	6.16846	7.00143	6.18858	6.53284	6.06753	1.28213	4.75356	5.29549
ENSGALG00000014689	FAM131B	ENSGALT00000023673	GO:0005829(cytosol);GO:0005654(nucleoplasm)	NA	NA	NA	family with sequence similarity 131 member B [Source:HGNC Symbol;Acc:HGNC:22202]	39.0855	35.2629	30.9704	13.2305	11.3752	10.3981	8.04348	8.73766	2.90952	2.2344	1.65645	0.988625	1.5125	2.63243	1.08979	2.09576	0.765123
ENSGALG00000012339	ATL1	ENSGALT00000089842;ENSGALT00000020162;ENSGALT00000066343	GO:0071782(endoplasmic reticulum tubular network);GO:0016021(integral component of membrane);GO:0005737(cytoplasm);GO:0005783(endoplasmic reticulum);GO:0051260(protein homooligomerization);GO:0007029(endoplasmic reticulum organization);GO:0042802(identical protein binding);GO:0003924(GTPase activity);GO:0005525(GTP binding);GO:0000166(nucleotide binding);GO:0016020(membrane);GO:1990809(endoplasmi…	NA	NA	NA	atlastin GTPase 1 [Source:HGNC Symbol;Acc:HGNC:11231]	25.0784	19.5733	21.2928	12.1099	12.9205	5.51218	7.17254	5.49939	2.79622	2.22676	2.37783	2.51667	2.23242	2.70182	2.08563	3.24873	3.19924
ENSGALG00000000424	CMTM3	ENSGALT00000039221;ENSGALT00000088689	GO:0031965(nuclear membrane);GO:0005737(cytoplasm);GO:0050861(positive regulation of B cell receptor signaling pathway);GO:0016021(integral component of membrane);GO:0016020(membrane);GO:0016020(membrane)	NA	NA	NA	CKLF like MARVEL transmembrane domain containing 3 [Source:HGNC Symbol;Acc:HGNC:19174]	119.191	114.701	115.098	66.7827	59.3301	27.1413	25.4853	29.5606	11.3714	9.72722	8.38355	10.2552	7.75952	21.3657	11.7697	13.1235	7.77921
ENSGALG00000002714	TMEM132C	ENSGALT00000004281	GO:0016021(integral component of membrane);GO:0016020(membrane)	NA	NA	NA	transmembrane protein 132C [Source:HGNC Symbol;Acc:HGNC:25436]	3.59745	3.72846	4.57501	2.19346	3.44411	1.01012	1.15492	1.52	0.199842	0.139874	0.278937	0.177171	0.174812	0.205358	0.056295	0.057324	0.113647
ENSGALG00000011439	RBMS3	ENSGALT00000037692	GO:0003723(RNA binding);GO:0003676(nucleic acid binding);GO:0003730(mRNA 3'-UTR binding);GO:0008143(poly(A) binding);GO:0008266(poly(U) RNA binding);GO:0035925(mRNA 3'-UTR AU-rich region binding);GO:0002357(defense response to tumor cell);GO:0010628(positive regulation of gene expression);GO:0010629(negative regulation of gene expression);GO:0045727(positive regulation of translation);GO:0090090(…	NA	NA	NA	RNA binding motif single stranded interacting protein 3 [Source:HGNC Symbol;Acc:HGNC:13427]	63.3251	55.7344	57.5199	61.1933	56.3431	39.3379	31.3514	35.6833	12.3586	11.119	8.9218	9.71074	7.05692	8.53245	8.96334	9.76874	10.9158
ENSGALG00000033541	FRMPD4	ENSGALT00000050101;ENSGALT00000049598	GO:0005546(phosphatidylinositol-4,5-bisphosphate binding);GO:0043197(dendritic spine);GO:0043234(protein complex);GO:0051835(positive regulation of synapse structural plasticity);GO:0051835(positive regulation of synapse structural plasticity)	NA	NA	NA	FERM and PDZ domain containing 4 [Source:HGNC Symbol;Acc:HGNC:29007]	11.5052	8.57499	8.89538	2.34086	2.31999	0.96248	1.1457	1.9778	0.383811	0.0973309	0.159274	0.0354488	0.0944309	0.185139	0.0827102	0.0247429	0.0132409
ENSGALG00000025858	LUZP1	ENSGALT00000043867	GO:0003281(ventricular septum development);GO:0021503(neural fold bending);GO:0060840(artery development);GO:0005634(nucleus);GO:0016020(membrane);GO:0070062(extracellular exosome)	NA	NA	NA	leucine zipper protein 1 [Source:HGNC Symbol;Acc:HGNC:14985]	9.05546	11.2129	11.4243	5.60334	5.66342	3.18647	3.26318	2.62145	0.779456	0.585677	0.664501	0.839789	0.514219	1.17407	0.681128	0.807971	1.13224
ENSGALG00000007748	SLC16A2	ENSGALT00000012561	GO:0005887(integral component of plasma membrane);GO:0005886(plasma membrane);GO:0070327(thyroid hormone transport);GO:0015349(thyroid hormone transmembrane transporter activity);GO:0016021(integral component of membrane);GO:0055085(transmembrane transport);GO:0016020(membrane);GO:0008028(monocarboxylic acid transmembrane transporter activity);GO:0015718(monocarboxylic acid transport)	NA	NA	NA	solute carrier family 16 member 2 [Source:HGNC Symbol;Acc:HGNC:10923]	25.2427	19.0985	20.6114	10.897	12.0602	7.2933	11.8045	7.9965	1.73971	2.0078	1.46141	2.06531	2.24759	2.46036	2.02976	2.21122	2.36086
ENSGALG00000008053	PRDM11	ENSGALT00000068425;ENSGALT00000013067;ENSGALT00000068789;ENSGALT00000056095	NA	NA	NA	NA	PR/SET domain 11 [Source:HGNC Symbol;Acc:HGNC:13996]	16.0803	16.1537	16.2425	16.6523	18.3528	12.1247	13.5103	14.3451	4.11383	3.86766	4.20251	3.25689	2.77327	3.5873	2.63191	3.25422	2.32376
ENSGALG00000013715	DLC1	ENSGALT00000082225;ENSGALT00000022297	GO:0008360(regulation of cell shape);GO:0032956(regulation of actin cytoskeleton organization);GO:0008285(negative regulation of cell proliferation);GO:0005925(focal adhesion);GO:0005096(GTPase activator activity);GO:0035024(negative regulation of Rho protein signal transduction);GO:0030336(negative regulation of cell migration);GO:0006915(apoptotic process);GO:0005901(caveola);GO:0005829(cytosol…	NA	NA	NA	DLC1 Rho GTPase activating protein [Source:HGNC Symbol;Acc:HGNC:2897]	51.8009	48.4266	48.1636	46.3546	40.2853	32.0975	39.8072	37.6211	8.16255	10.1408	11.7465	11.3196	7.63167	8.26419	7.15128	9.36332	6.44083
ENSGALG00000000557	ETNK2	ENSGALT00000000773	GO:0035264(multicellular organism growth);GO:0016310(phosphorylation);GO:0009791(post-embryonic development);GO:0006646(phosphatidylethanolamine biosynthetic process);GO:0004305(ethanolamine kinase activity)	00564(Glycerophospholipid metabolism)	K00894	EC:2.7.1.82	ethanolamine kinase 2 [Source:HGNC Symbol;Acc:HGNC:25575]	9.47752	11.5346	11.0016	29.7031	39.9606	3.01956	7.69419	8.49465	2.07607	0.769029	1.18919	0.628616	0.362287	0.750557	0.27921	0.594135	0.724583
ENSGALG00000002958	DNER	ENSGALT00000004678;ENSGALT00000088244	GO:0043025(neuronal cell body);GO:0030425(dendrite);GO:0005886(plasma membrane);GO:0005769(early endosome);GO:0060088(auditory receptor cell stereocilium organization);GO:0048741(skeletal muscle fiber development);GO:0035678(neuromast hair cell morphogenesis);GO:0010001(glial cell differentiation);GO:0007417(central nervous system development);GO:0007220(Notch receptor processing);GO:0005112(Notc…	NA	NA	NA	delta/notch like EGF repeat containing [Source:HGNC Symbol;Acc:HGNC:24456]	5.4976	2.96155	2.46504	2.99631	3.6939	0.71494	0.383012	0.600392	0.0656927	0.0263907	0.046036	0.0627844	0.0159327	0.0584424	0.0287832	0.0271348	0.094384
ENSGALG00000003675	PRKAR1B	ENSGALT00000005824;ENSGALT00000069539;ENSGALT00000088638	GO:0005952(cAMP-dependent protein kinase complex);GO:0030552(cAMP binding);GO:0001932(regulation of protein phosphorylation);GO:0008603(cAMP-dependent protein kinase regulator activity);GO:0045859(regulation of protein kinase activity);GO:0000166(nucleotide binding);GO:0007611(learning or memory);GO:0004862(cAMP-dependent protein kinase inhibitor activity);GO:0034236(protein kinase A catalytic su…	04910(Insulin signaling pathway);04910(Insulin signaling pathway)	K04739	NA	protein kinase cAMP-dependent type I regulatory subunit beta [Source:HGNC Symbol;Acc:HGNC:9390]	35.8901	29.7912	31.5636	21.1615	19.4136	17.9757	16.3555	15.0528	4.59244	4.34306	5.07925	3.3882	3.12859	4.69398	3.17465	4.669	4.09916
ENSGALG00000029022	NPAS3	ENSGALT00000085517;ENSGALT00000088783;ENSGALT00000043412	GO:0005654(nucleoplasm);GO:0005829(cytosol);GO:0000981(RNA polymerase II transcription factor activity, sequence-specific DNA binding);GO:0006357(regulation of transcription from RNA polymerase II promoter);GO:0032502(developmental process);GO:0005634(nucleus);GO:0006355(regulation of transcription, DNA-templated);GO:0006355(regulation of transcription, DNA-templated)	NA	NA	NA	neuronal PAS domain protein 3 [Source:HGNC Symbol;Acc:HGNC:19311]	10.9615	7.02712	8.47025	3.72741	5.77383	3.00569	3.03744	3.00667	1.54106	1.09121	1.04151	1.14347	1.07205	1.02415	0.394814	0.486329	0.413566
ENSGALG00000010794	MEOX2	ENSGALT00000017555	GO:0005737(cytoplasm);GO:0005634(nucleus);GO:0090051(negative regulation of cell migration involved in sprouting angiogenesis);GO:0070997(neuron death);GO:0061053(somite development);GO:0060173(limb development);GO:0060021(palate development);GO:0045944(positive regulation of transcription from RNA polymerase II promoter);GO:0007519(skeletal muscle tissue development);GO:0001757(somite specificat…	NA	NA	NA	mesenchyme homeobox 2 [Source:HGNC Symbol;Acc:HGNC:7014]	60.7507	56.3138	53.9496	28.9505	30.2194	31.8005	33.318	29.0002	8.94298	8.62755	8.97513	11.6789	10.1617	8.23972	7.86651	10.5332	8.40759
ENSGALG00000015879	HUNK	ENSGALT00000025595	GO:0006468(protein phosphorylation);GO:0004674(protein serine/threonine kinase activity);GO:0004672(protein kinase activity);GO:0035556(intracellular signal transduction);GO:0005634(nucleus);GO:0005737(cytoplasm);GO:0005524(ATP binding)	NA	NA	NA	hormonally up-regulated Neu-associated kinase [Source:HGNC Symbol;Acc:HGNC:13326]	13.3694	13.8152	14.3098	8.39715	7.54526	4.49529	4.1018	3.35334	1.7709	1.45182	1.17119	0.699147	0.975158	1.37188	0.770876	1.04696	1.0051
ENSGALG00000008567	PACS1	ENSGALT00000013953	GO:0044325(ion channel binding);GO:0072659(protein localization to plasma membrane)	NA	NA	NA	phosphofurin acidic cluster sorting protein 1 [Source:HGNC Symbol;Acc:HGNC:30032]	25.0576	20.2192	24.5797	11.085	10.9979	7.80016	8.43931	9.01	2.14178	2.18356	2.36954	2.09369	2.35253	3.58015	2.95016	2.21584	3.34914
ENSGALG00000004518		ENSGALT00000007194	GO:0009086(methionine biosynthetic process);GO:0047150(betaine-homocysteine S-methyltransferase activity);GO:0008270(zinc ion binding);GO:0032259(methylation);GO:0008168(methyltransferase activity);GO:0046872(metal ion binding);GO:0005737(cytoplasm);GO:0016740(transferase activity)	00260(Glycine, serine and threonine metabolism);00270(Cysteine and methionine metabolism)	K00544	EC:2.1.1.5		1436.58	1951.59	1548.36	1184.31	1133.6	207.785	122.581	116.578	224.936	248.158	147.489	152.933	138.795	65.2145	53.9342	130.738	56.6486
ENSGALG00000016824	TMCO3	ENSGALT00000043071	GO:1902600(hydrogen ion transmembrane transport);GO:0022890(inorganic cation transmembrane transporter activity);GO:0015299(solute:proton antiporter activity);GO:0098655(cation transmembrane transport);GO:0006812(cation transport);GO:0016020(membrane);GO:0055085(transmembrane transport);GO:0016021(integral component of membrane)	NA	NA	NA	transmembrane and coiled-coil domains 3 [Source:HGNC Symbol;Acc:HGNC:20329]	19.323	17.0644	16.1442	10.8837	10.7096	7.43293	6.68377	8.28607	2.63474	3.55566	2.1431	1.96129	1.74402	2.26026	2.09558	1.66785	1.46924
ENSGALG00000010957	USP1	ENSGALT00000017833;ENSGALT00000061165	GO:0005654(nucleoplasm);GO:0005634(nucleus);GO:0035520(monoubiquitinated protein deubiquitination);GO:0016579(protein deubiquitination);GO:0009411(response to UV);GO:0006282(regulation of DNA repair);GO:0001501(skeletal system development);GO:0004843(thiol-dependent ubiquitin-specific protease activity);GO:0036459(thiol-dependent ubiquitinyl hydrolase activity);GO:0004197(cysteine-type endopeptid…	03460(Fanconi anemia pathway);03460(Fanconi anemia pathway)	K11832	EC:3.4.19.12	ubiquitin specific peptidase 1 [Source:HGNC Symbol;Acc:HGNC:12607]	41.849	36.4241	40.9554	16.0449	18.5921	16.1728	11.3497	12.3859	5.60324	4.22835	3.25249	4.21551	3.32343	5.02988	4.84234	3.28528	2.22755
ENSGALG00000012659	CKAP4	ENSGALT00000020663	GO:0070062(extracellular exosome);GO:0031012(extracellular matrix);GO:0016607(nuclear speck);GO:0005829(cytosol);GO:0005811(lipid droplet);GO:0005783(endoplasmic reticulum);GO:0003723(RNA binding);GO:0005791(rough endoplasmic reticulum);GO:0036464(cytoplasmic ribonucleoprotein granule)	NA	NA	NA	cytoskeleton associated protein 4 [Source:HGNC Symbol;Acc:HGNC:16991]	72.0132	65.5869	67.8629	41.2909	41.5259	15.6769	19.0475	14.4937	8.63435	4.6581	4.90428	8.53842	5.38908	12.8588	4.42138	5.97357	4.00875
ENSGALG00000005035	KAT6B	ENSGALT00000008074	GO:0016573(histone acetylation);GO:0004402(histone acetyltransferase activity);GO:0070776(MOZ/MORF histone acetyltransferase complex);GO:0045893(positive regulation of transcription, DNA-templated);GO:0045892(negative regulation of transcription, DNA-templated);GO:0043966(histone H3 acetylation);GO:0016407(acetyltransferase activity);GO:0008134(transcription factor binding);GO:0000786(nucleosome)…	NA	NA	NA	lysine acetyltransferase 6B [Source:HGNC Symbol;Acc:HGNC:17582]	42.9904	37.6853	43.7644	26.3805	25.1108	19.1185	18.7718	22.7431	8.19352	6.92663	5.52656	6.58272	7.50255	6.59621	6.46674	5.5584	3.62481
ENSGALG00000004087	THSD4	ENSGALT00000006501	GO:0070062(extracellular exosome);GO:0031012(extracellular matrix);GO:0005578(proteinaceous extracellular matrix);GO:0001527(microfibril);GO:0048251(elastic fiber assembly);GO:0008233(peptidase activity);GO:0006508(proteolysis)	NA	NA	NA	thrombospondin type 1 domain containing 4 [Source:HGNC Symbol;Acc:HGNC:25835]	45.3931	43.9719	45.5831	45.3467	42.9703	34.233	24.2378	26.3516	5.44086	8.10342	5.58405	4.7233	4.5713	7.61421	5.11317	4.22449	8.12386
ENSGALG00000001264	PLXNA2	ENSGALT00000001931	GO:0005887(integral component of plasma membrane);GO:0071526(semaphorin-plexin signaling pathway);GO:0060174(limb bud formation);GO:0060037(pharyngeal system development);GO:0051642(centrosome localization);GO:0030334(regulation of cell migration);GO:0021935(cerebellar granule cell precursor tangential migration);GO:0021915(neural tube development);GO:0007166(cell surface receptor signaling pathw…	NA	NA	NA	plexin A2 [Source:HGNC Symbol;Acc:HGNC:9100]	81.9226	79.4027	65.4016	46.7112	59.3196	24.187	28.4862	28.0762	16.4548	8.40285	10.9123	5.29045	6.74307	4.01062	2.44022	5.9021	6.22806
ENSGALG00000037423	PTPRK	ENSGALT00000074459	GO:0019901(protein kinase binding);GO:0016477(cell migration);GO:0034394(protein localization to cell surface);GO:0009986(cell surface);GO:0045892(negative regulation of transcription, DNA-templated);GO:0045786(negative regulation of cell cycle);GO:0005911(cell-cell junction);GO:0008285(negative regulation of cell proliferation);GO:0004725(protein tyrosine phosphatase activity);GO:0010839(negativ…	NA	NA	NA	protein tyrosine phosphatase, receptor type K [Source:HGNC Symbol;Acc:HGNC:9674]	17.2223	14.4127	15.6452	5.09994	5.82717	3.03352	3.00375	3.0908	2.69144	1.92315	1.93878	1.56856	2.05482	2.47866	1.88941	1.63521	1.89522
ENSGALG00000030918	CIRBP	ENSGALT00000078827;ENSGALT00000047585;ENSGALT00000066254	GO:0003723(RNA binding);GO:0003676(nucleic acid binding);GO:0008266(poly(U) RNA binding);GO:0030371(translation repressor activity);GO:0017148(negative regulation of translation);GO:0030308(negative regulation of cell growth);GO:0034063(stress granule assembly);GO:0070417(cellular response to cold);GO:1902806(regulation of cell cycle G1/S phase transition);GO:0005634(nucleus);GO:0005654(nucleopla…	NA	NA	NA	cold inducible RNA binding protein [Source:HGNC Symbol;Acc:HGNC:1982]	63.5413	66.8885	63.7401	36.4992	38.4605	68.9794	59.2923	74.2143	15.2862	11.8964	6.81869	9.2213	7.28756	8.3926	8.73579	4.1781	4.22184
ENSGALG00000016462	MYCN	ENSGALT00000036884	GO:0005730(nucleolus);GO:0005634(nucleus);GO:0045893(positive regulation of transcription, DNA-templated);GO:0010629(negative regulation of gene expression);GO:0010628(positive regulation of gene expression);GO:0003700(transcription factor activity, sequence-specific DNA binding);GO:0006355(regulation of transcription, DNA-templated);GO:0006366(transcription from RNA polymerase II promoter);GO:00…	NA	NA	NA	MYCN proto-oncogene, bHLH transcription factor [Source:HGNC Symbol;Acc:HGNC:7559]	29.0315	26.6282	29.6348	8.84761	11.2333	16.0154	10.3709	12.3871	3.43314	3.24935	3.49416	2.56844	2.44145	2.44811	0.797125	1.80508	1.82698
ENSGALG00000015152	BOC	ENSGALT00000024449	GO:0007224(smoothened signaling pathway);GO:0045663(positive regulation of myoblast differentiation);GO:0007411(axon guidance);GO:0005887(integral component of plasma membrane);GO:0016021(integral component of membrane);GO:0016020(membrane)	04340(Hedgehog signaling pathway)	K20020	NA	BOC cell adhesion associated, oncogene regulated [Source:HGNC Symbol;Acc:HGNC:17173]	33.2313	32.4214	29.1472	30.7157	26.9561	11.2732	16.7688	10.7536	4.13726	2.68089	4.83831	5.40156	5.22734	5.39308	2.03132	4.02538	2.49555
ENSGALG00000037370		ENSGALT00000055438	NA	NA	NA	NA		38.9691	39.2468	37.4639	38.5475	34.8717	13.7544	12.8947	12.1461	2.88177	2.51144	3.29785	2.51777	3.00969	5.31621	2.11892	4.18192	6.22256
ENSGALG00000001093	TCF3	ENSGALT00000001637;ENSGALT00000053250;ENSGALT00000058164;ENSGALT00000041183	GO:0090575(RNA polymerase II transcription factor complex);GO:0005667(transcription factor complex);GO:0070888(E-box binding);GO:0046982(protein heterodimerization activity);GO:0042803(protein homodimerization activity);GO:0045666(positive regulation of neuron differentiation);GO:0000978(RNA polymerase II core promoter proximal region sequence-specific DNA binding);GO:0045944(positive regulation …	NA	NA	NA	transcription factor 3 [Source:HGNC Symbol;Acc:HGNC:11633]	64.9189	67.7908	77.1594	38.236	38.2348	22.2517	28.5575	25.0145	9.08637	8.04957	10.0847	9.61379	8.5371	17.235	7.38903	9.14453	8.81405
ENSGALG00000011581	KIF26A	ENSGALT00000018906	GO:0048484(enteric nervous system development);GO:0009968(negative regulation of signal transduction);GO:0001560(regulation of cell growth by extracellular stimulus);GO:0008017(microtubule binding);GO:0005871(kinesin complex);GO:0003777(microtubule motor activity);GO:0003774(motor activity);GO:0005524(ATP binding);GO:0000166(nucleotide binding)	NA	NA	NA	kinesin family member 26A [Source:HGNC Symbol;Acc:HGNC:20226]	24.4599	16.4809	19.9366	10.8697	9.50636	3.73556	4.97557	5.14982	2.0777	1.70617	2.36995	3.12868	4.49851	3.04691	1.44404	2.57804	1.60701
ENSGALG00000009925	MTA3	ENSGALT00000088167;ENSGALT00000016137;ENSGALT00000062543	GO:0043231(intracellular membrane-bounded organelle);GO:0005737(cytoplasm);GO:0005634(nucleus);GO:0045892(negative regulation of transcription, DNA-templated);GO:0010971(positive regulation of G2/M transition of mitotic cell cycle);GO:0003682(chromatin binding);GO:0008284(positive regulation of cell proliferation);GO:0043565(sequence-specific DNA binding);GO:0003700(transcription factor activity,…	NA	NA	NA	metastasis associated 1 family member 3 [Source:HGNC Symbol;Acc:HGNC:23784]	32.969	31.9777	28.9788	17.2195	19.1528	9.84412	8.14485	10.1155	6.21444	4.48171	3.40012	2.67765	2.38864	4.00669	3.81969	3.10156	3.45209
ENSGALG00000043036	VASH1	ENSGALT00000048369	GO:0005615(extracellular space);GO:0005783(endoplasmic reticulum);GO:0005737(cytoplasm);GO:0060716(labyrinthine layer blood vessel development);GO:0045177(apical part of cell);GO:0001937(negative regulation of endothelial cell proliferation);GO:0001525(angiogenesis);GO:0009611(response to wounding);GO:0016525(negative regulation of angiogenesis);GO:0060674(placenta blood vessel development);GO:00…	NA	NA	NA	vasohibin 1 [Source:HGNC Symbol;Acc:HGNC:19964]	81.7451	103.654	97.536	29.1625	28.922	10.024	18.7137	14.1936	10.2252	5.97142	8.50902	8.91467	10.1314	12.0537	6.66159	9.43936	7.58896
ENSGALG00000038978		ENSGALT00000072398	NA	NA	NA	NA		42.9594	37.4792	37.9165	15.9631	17.8387	10.0021	9.34082	9.19958	7.84589	5.18703	4.89921	5.87141	5.11049	5.51649	5.22473	5.90347	3.90196
ENSGALG00000032905		ENSGALT00000070221	NA	NA	NA	NA		5.11142	5.73855	6.83669	4.83789	4.54153	1.13989	1.20589	0.895328	0.334075	0.228492	0.381681	0.2505	0.183706	0.142103	0.133376	0.13311	0.081472
ENSGALG00000011689	PDIA5	ENSGALT00000019110;ENSGALT00000065738;ENSGALT00000060581	GO:0034976(response to endoplasmic reticulum stress);GO:0006457(protein folding);GO:0003756(protein disulfide isomerase activity);GO:0045454(cell redox homeostasis);GO:0005783(endoplasmic reticulum);GO:0055114(oxidation-reduction process);GO:0015037(peptide disulfide oxidoreductase activity);GO:0015037(peptide disulfide oxidoreductase activity)	NA	NA	NA	protein disulfide isomerase family A member 5 [Source:HGNC Symbol;Acc:HGNC:24811]	35.1258	33.1084	40.3093	25.5372	25.8567	10.1511	7.2452	9.91137	5.06068	4.01149	4.56524	4.22524	3.72381	7.24134	4.4517	4.63875	3.58892
ENSGALG00000019987	LRP11	ENSGALT00000031799	GO:0042594(response to starvation);GO:0035902(response to immobilization stress);GO:0033555(multicellular organismal response to stress);GO:0009612(response to mechanical stimulus);GO:0009414(response to water deprivation);GO:0009409(response to cold);GO:0009408(response to heat);GO:0051219(phosphoprotein binding);GO:0016021(integral component of membrane);GO:0016020(membrane)	NA	NA	NA	LDL receptor related protein 11 [Source:HGNC Symbol;Acc:HGNC:16936]	17.8134	18.6542	14.1008	18.8685	20.2034	8.73941	9.3865	11.4888	1.55295	1.05738	1.38055	1.18686	1.16909	1.01489	0.147659	0.687335	0.120331
ENSGALG00000040184	RIMKLB	ENSGALT00000080489	GO:0005737(cytoplasm);GO:0072590(N-acetyl-L-aspartate-L-glutamate ligase activity);GO:0072591(citrate-L-glutamate ligase activity)	00250(Alanine, aspartate and glutamate metabolism)	K18310	EC:6.3.1.17;EC:6.3.2.41	ribosomal modification protein rimK like family member B [Source:HGNC Symbol;Acc:HGNC:29228]	31.6238	26.5848	27.1795	18.3834	19.1934	8.58136	7.79986	7.06807	3.45207	2.80162	3.7097	2.9421	3.07474	4.24204	2.92756	2.50717	3.37706
ENSGALG00000026757		ENSGALT00000052890;ENSGALT00000044321	GO:0005739(mitochondrion);GO:0005737(cytoplasm);GO:2000121(regulation of removal of superoxide radicals);GO:0051000(positive regulation of nitric-oxide synthase activity);GO:0009165(nucleotide biosynthetic process);GO:0006545(glycine biosynthetic process);GO:0006729(tetrahydrobiopterin biosynthetic process);GO:0050661(NADP binding);GO:0004146(dihydrofolate reductase activity);GO:0055114(oxidation…	00790(Folate biosynthesis);00670(One carbon pool by folate);00670(One carbon pool by folate)	K00287	EC:1.5.1.3		15.576	16.5339	16.0008	3.27678	3.3238	3.40981	1.78869	2.29406	1.41029	0.815378	0.472175	0.816226	0.807273	0.759041	0.250568	0.450345	0.215128
ENSGALG00000031960	Lef-1	ENSGALT00000054579	GO:1990907(beta-catenin-TCF complex);GO:0032993(protein-DNA complex);GO:0005737(cytoplasm);GO:0005667(transcription factor complex);GO:0005634(nucleus);GO:1902262(apoptotic process involved in blood vessel morphogenesis);GO:0090090(negative regulation of canonical Wnt signaling pathway);GO:0071895(odontoblast differentiation);GO:0071899(negative regulation of estrogen receptor binding);GO:0071866…	04310(Wnt signaling pathway);04520(Adherens junction);04916(Melanogenesis)	K04492	NA	lymphoid enhancer binding factor 1 [Source:HGNC Symbol;Acc:HGNC:6551]	16.8591	16.8487	17.0466	4.78134	6.58169	1.45868	1.7855	1.29512	0.443454	0.544202	0.484273	0.750896	0.530219	1.71306	0.777901	0.777028	0.25837
ENSGALG00000001916	SLIT3	ENSGALT00000002967	GO:0005615(extracellular space);GO:0070100(negative regulation of chemokine-mediated signaling pathway);GO:0061364(apoptotic process involved in luteolysis);GO:0051414(response to cortisol);GO:0050919(negative chemotaxis);GO:0048846(axon extension involved in axon guidance);GO:0035385(Roundabout signaling pathway);GO:0032870(cellular response to hormone stimulus);GO:0030308(negative regulation of…	NA	NA	NA	slit guidance ligand 3 [Source:HGNC Symbol;Acc:HGNC:11087]	21.7337	12.7104	17.5398	8.65192	9.15925	5.03199	5.67227	3.86038	1.056	1.0603	1.48857	1.19338	0.719625	2.27496	1.23776	1.09949	0.850314
ENSGALG00000040620	LSAMP	ENSGALT00000070123;ENSGALT00000085465;ENSGALT00000050651	GO:0007155(cell adhesion);GO:0031225(anchored component of membrane);GO:0005886(plasma membrane);GO:0016020(membrane);GO:0035641(locomotory exploration behavior);GO:0035641(locomotory exploration behavior)	NA	NA	NA	Limbic system-associated membrane protein [Source:UniProtKB/Swiss-Prot;Acc:Q98919]	15.0897	11.184	14.6044	15.5912	15.4555	4.87737	9.6127	7.4169	1.03017	1.42127	1.51985	1.62748	0.953714	1.32248	1.69261	1.84629	2.13736
ENSGALG00000030647	MFAP2	ENSGALT00000058629	NA	NA	NA	NA	microfibril associated protein 2 [Source:HGNC Symbol;Acc:HGNC:7033]	47.7837	49.5921	49.6425	32.9141	34.0969	6.76801	17.8599	10.3557	1.12206	0.760172	0.784801	0.834172	1.11224	1.13438	0.024281	0.889406	0.361679
ENSGALG00000011274	DCN	ENSGALT00000018395;ENSGALT00000086852;ENSGALT00000084682;ENSGALT00000089781	GO:0031012(extracellular matrix);GO:0005615(extracellular space);GO:1900747(negative regulation of vascular endothelial growth factor signaling pathway);GO:0090141(positive regulation of mitochondrial fission);GO:0051901(positive regulation of mitochondrial depolarization);GO:0045944(positive regulation of transcription from RNA polymerase II promoter);GO:0019800(peptide cross-linking via chondro…	04350(TGF-beta signaling pathway);04350(TGF-beta signaling pathway)	K04660	NA	decorin [Source:HGNC Symbol;Acc:HGNC:2705]	655.472	525.575	636.344	598.976	578.979	314.653	352.294	342.773	94.4879	67.3502	85.7201	159.042	80.6768	81.2162	77.6338	81.5299	60.9522
ENSGALG00000004728	RGL1	ENSGALT00000007530	GO:0008321(Ral guanyl-nucleotide exchange factor activity);GO:0005085(guanyl-nucleotide exchange factor activity);GO:0007264(small GTPase mediated signal transduction);GO:0005622(intracellular);GO:0007165(signal transduction);GO:0065009(regulation of molecular function)	NA	NA	NA	ral guanine nucleotide dissociation stimulator like 1 [Source:HGNC Symbol;Acc:HGNC:30281]	61.7615	58.9235	48.7963	60.3809	61.4853	31.4369	41.8325	33.0084	9.22504	9.00799	10.8081	12.7816	7.63084	14.1105	10.1167	10.7642	10.5568
ENSGALG00000016457	TRIB2	ENSGALT00000036892	GO:0031434(mitogen-activated protein kinase kinase binding);GO:0032436(positive regulation of proteasomal ubiquitin-dependent protein catabolic process);GO:0005634(nucleus);GO:0006468(protein phosphorylation);GO:0005524(ATP binding);GO:0004672(protein kinase activity);GO:0008134(transcription factor binding);GO:0031625(ubiquitin protein ligase binding);GO:0055106(ubiquitin-protein transferase reg…	NA	NA	NA	tribbles pseudokinase 2 [Source:HGNC Symbol;Acc:HGNC:30809]	115.528	129.038	123.014	57.8356	55.8703	40.6566	28.3139	35.7634	11.4454	15.4444	7.65616	7.45389	8.58561	11.166	10.6097	9.07769	21.294
ENSGALG00000032287	ATP2A2	ENSGALT00000085704;ENSGALT00000087059;ENSGALT00000072840;ENSGALT00000062494	GO:0044548(S100 protein binding);GO:0005789(endoplasmic reticulum membrane);GO:0005783(endoplasmic reticulum);GO:0016529(sarcoplasmic reticulum);GO:0005654(nucleoplasm);GO:0016020(membrane);GO:0019899(enzyme binding);GO:0034599(cellular response to oxidative stress);GO:0014883(transition between fast and slow fiber);GO:0002026(regulation of the force of heart contraction);GO:0014898(cardiac muscl…	04020(Calcium signaling pathway);04020(Calcium signaling pathway)	K05853	EC:3.6.3.8	ATPase sarcoplasmic/endoplasmic reticulum Ca2+ transporting 2 [Source:HGNC Symbol;Acc:HGNC:812]	214.479	197.075	200.761	66.4511	72.5197	70.4594	29.9116	72.7925	12.403	9.11469	10.4901	10.9086	10.451	25.7188	9.64489	12.4258	17.2003
ENSGALG00000036847		ENSGALT00000072851	NA	NA	NA	NA		88.4038	75.0226	66.7826	44.6159	50.9462	23.1497	14.7545	19.4587	5.14138	6.09622	6.62893	8.89168	3.86557	3.97716	12.3575	10.299	9.68204
ENSGALG00000010448	LTBP1	ENSGALT00000017012;ENSGALT00000086357	GO:0043234(protein complex);GO:0031012(extracellular matrix);GO:0005615(extracellular space);GO:0005578(proteinaceous extracellular matrix);GO:0001527(microfibril);GO:0060976(coronary vasculature development);GO:0035904(aorta development);GO:0003281(ventricular septum development);GO:0050436(microfibril binding);GO:0050431(transforming growth factor beta binding);GO:0005509(calcium ion binding);G…	04350(TGF-beta signaling pathway);04350(TGF-beta signaling pathway)	K19559	NA	latent transforming growth factor beta binding protein 1 [Source:HGNC Symbol;Acc:HGNC:6714]	63.5906	49.9902	53.2612	21.154	20.5225	24.8643	23.1421	27.066	5.12202	4.70931	5.7471	6.296	3.31369	10.9584	3.4704	4.57527	4.74165
ENSGALG00000034007	ITGA6	ENSGALT00000081430;ENSGALT00000057481;ENSGALT00000084249;ENSGALT00000060385	GO:0005886(plasma membrane);GO:0043547(positive regulation of GTPase activity);GO:0009986(cell surface);GO:0045944(positive regulation of transcription from RNA polymerase II promoter);GO:0045296(cadherin binding);GO:0005925(focal adhesion);GO:0048565(digestive tract development);GO:0031994(insulin-like growth factor I binding);GO:0038132(neuregulin binding);GO:0035878(nail development);GO:004358…	04512(ECM-receptor interaction);04514(Cell adhesion molecules (CAMs));04510(Focal adhesion);04810(Regulation of actin cytoskeleton);04810(Regulation of actin cytoskeleton)	K06485	NA	integrin subunit alpha 6 [Source:HGNC Symbol;Acc:HGNC:6142]	128.734	155.266	117.019	55.1819	59.2722	32.336	28.8973	32.9275	19.9893	12.5003	10.4715	18.0319	18.956	12.8348	27.7738	24.9456	33.3885
ENSGALG00000008369	ABCC5	ENSGALT00000060903;ENSGALT00000013625;ENSGALT00000053178	GO:0016020(membrane);GO:0015711(organic anion transport);GO:0008514(organic anion transmembrane transporter activity);GO:0055085(transmembrane transport);GO:0042626(ATPase activity, coupled to transmembrane movement of substances);GO:0005524(ATP binding);GO:0016021(integral component of membrane);GO:0016021(integral component of membrane)	02010(ABC transporters);02010(ABC transporters)	K05668	NA	ATP binding cassette subfamily C member 5 [Source:HGNC Symbol;Acc:HGNC:56]	84.4234	112.115	106.316	108.905	98.7382	108.888	69.944	107.809	40.1458	30.3343	17.0394	3.92264	5.1476	6.15195	15.3856	7.94149	6.79273
ENSGALG00000041477		ENSGALT00000054490;ENSGALT00000071296	NA	NA	NA	NA		16.7796	12.4235	15.8144	18.3834	22.5622	5.25392	8.07603	10.8255	1.78893	1.15705	1.13448	1.15829	0.971577	1.42127	1.18701	1.03953	1.82376
ENSGALG00000015119	SS18	ENSGALT00000024398;ENSGALT00000063476;ENSGALT00000056828;ENSGALT00000049362	GO:0030374(ligand-dependent nuclear receptor transcription coactivator activity);GO:0045944(positive regulation of transcription from RNA polymerase II promoter);GO:0005881(cytoplasmic microtubule);GO:0000902(cell morphogenesis);GO:0000226(microtubule cytoskeleton organization);GO:0042493(response to drug);GO:0035556(intracellular signal transduction);GO:0007010(cytoskeleton organization);GO:0048…	NA	NA	NA	SS18, nBAF chromatin remodeling complex subunit [Source:HGNC Symbol;Acc:HGNC:11340]	38.4914	39.7688	45.1145	22.4009	20.6013	14.6426	16.1708	16.2723	5.66865	5.01712	3.69902	8.23769	4.48258	6.88186	6.40083	4.97517	4.20166
ENSGALG00000033781	FEN1	ENSGALT00000065146	GO:0005654(nucleoplasm);GO:0004519(endonuclease activity);GO:0006260(DNA replication);GO:0004527(exonuclease activity);GO:0004518(nuclease activity);GO:0016788(hydrolase activity, acting on ester bonds);GO:0090502(RNA phosphodiester bond hydrolysis, endonucleolytic);GO:0005730(nucleolus);GO:0006974(cellular response to DNA damage stimulus);GO:0006281(DNA repair);GO:0016787(hydrolase activity);GO:…	03030(DNA replication);03410(Base excision repair);03450(Non-homologous end-joining)	K04799	EC:3.-.-.-	Flap endonuclease 1 [Source:UniProtKB/Swiss-Prot;Acc:Q5ZLN4]	36.4947	34.4737	36.6501	9.75227	9.54519	8.93816	6.80569	8.32057	3.27554	2.39619	3.68743	3.18281	2.66463	6.85003	2.20116	2.8532	1.86319
ENSGALG00000042330		ENSGALT00000072326;ENSGALT00000073710	NA	NA	NA	NA		24.1304	21.3607	23.8651	14.9712	14.6321	9.66281	10.8905	9.70113	2.89049	1.99721	1.13596	2.38786	1.67214	1.02966	2.4173	1.88444	1.15111
ENSGALG00000008096	SUFU	ENSGALT00000013142;ENSGALT00000059661	GO:0008134(transcription factor binding);GO:0004871(signal transducer activity);GO:0003714(transcription corepressor activity);GO:0007275(multicellular organism development);GO:0007165(signal transduction);GO:0005737(cytoplasm);GO:0005634(nucleus);GO:0008013(beta-catenin binding);GO:0019901(protein kinase binding);GO:0000122(negative regulation of transcription from RNA polymerase II promoter);GO…	04340(Hedgehog signaling pathway);04340(Hedgehog signaling pathway)	K06229	NA	SUFU negative regulator of hedgehog signaling [Source:HGNC Symbol;Acc:HGNC:16466]	76.4807	78.5827	72.2058	70.8399	73.4047	41.084	38.1053	46.5664	14.4272	10.3341	13.8205	13.9822	11.6138	18.99	13.5633	14.5244	14.823
ENSGALG00000008938	DCLRE1A	ENSGALT00000033097	GO:0005654(nucleoplasm);GO:0006259(DNA metabolic process);GO:0001650(fibrillar center);GO:0035312(5'-3' exodeoxyribonuclease activity);GO:0090305(nucleic acid phosphodiester bond hydrolysis)	NA	NA	NA	DNA cross-link repair 1A [Source:HGNC Symbol;Acc:HGNC:17660]	22.58	25.1344	26.2781	10.9196	12.0053	4.13883	3.58706	3.01955	2.54247	2.33314	1.2398	2.69687	2.49199	2.35369	2.51683	1.97558	0.841241
ENSGALG00000000377	HNRNPM	ENSGALT00000000510	GO:0000398(mRNA splicing, via spliceosome);GO:0003723(RNA binding);GO:0003676(nucleic acid binding);GO:0031012(extracellular matrix)	03040(Spliceosome)	K12887	NA	heterogeneous nuclear ribonucleoprotein M [Source:RefSeq peptide;Acc:NP_001026103]	77.8682	82.099	88.3807	30.4835	33.6179	33.9546	26.6813	29.4169	16.0158	8.76418	9.10341	13.6193	11.5832	15.7813	9.83097	10.2696	7.00457
ENSGALG00000001816	MAGI3	ENSGALT00000002807	GO:0046328(regulation of JNK cascade);GO:0030054(cell junction);GO:0032947(protein complex scaffold activity);GO:0005911(cell-cell junction);GO:0007165(signal transduction)	NA	NA	NA	membrane associated guanylate kinase, WW and PDZ domain containing 3 [Source:HGNC Symbol;Acc:HGNC:29647]	24.8717	25.1823	23.3368	32.1132	27.9972	13.4933	12.992	13.215	5.72188	4.71139	4.37898	4.58208	4.21129	6.34019	6.13733	6.70278	4.43745
ENSGALG00000001283	SRRM1	ENSGALT00000001959;ENSGALT00000068463;ENSGALT00000065217	GO:0006397(mRNA processing);GO:0003723(RNA binding);GO:0016607(nuclear speck);GO:0071013(catalytic step 2 spliceosome);GO:0071013(catalytic step 2 spliceosome)	03013(RNA transport);03015(mRNA surveillance pathway);03015(mRNA surveillance pathway)	K13171	NA	serine and arginine repetitive matrix 1 [Source:HGNC Symbol;Acc:HGNC:16638]	61.4775	71.7498	73.4767	39.8688	40.6719	35.3987	35.03	34.2165	13.2683	10.9317	9.17881	12.6097	10.601	16.663	10.1775	12.3759	9.08873
ENSGALG00000000692	CDK18	ENSGALT00000000975	GO:0006468(protein phosphorylation);GO:0005634(nucleus);GO:0005737(cytoplasm);GO:0005524(ATP binding);GO:0004674(protein serine/threonine kinase activity);GO:0004672(protein kinase activity);GO:0000166(nucleotide binding)	NA	NA	NA	cyclin dependent kinase 18 [Source:HGNC Symbol;Acc:HGNC:8751]	12.1944	14.3197	12.8786	4.30466	3.78141	0.781772	1.09912	1.18647	0.228327	0.181243	0.760784	0.435159	0.608428	0.98616	0.133894	0.327226	0.159566
ENSGALG00000033925		ENSGALT00000048665;ENSGALT00000046742	NA	NA	NA	NA		6.53034	13.0682	10.6159	4.09246	4.84306	0.782104	0.847665	1.16205	0.24811	0.107899	0.276641	0.119592	0.168021	0.133144	0.131584	0.11556	0
ENSGALG00000002060	TAF15	ENSGALT00000003204	GO:0005737(cytoplasm);GO:0005634(nucleus);GO:0005654(nucleoplasm);GO:0003723(RNA binding);GO:0003676(nucleic acid binding);GO:0006355(regulation of transcription, DNA-templated);GO:0046872(metal ion binding)	03022(Basal transcription factors)	K14651	NA	TATA-box binding protein associated factor 15 [Source:HGNC Symbol;Acc:HGNC:11547]	63.9278	61.284	63.5822	25.4965	25.7648	9.78117	15.8237	10.8876	11.0263	8.47946	7.16509	11.7052	7.33953	11.0383	8.67851	7.72776	6.95803
ENSGALG00000028273		ENSGALT00000036371;ENSGALT00000036373;ENSGALT00000055900;ENSGALT00000068667	GO:0005833(hemoglobin complex);GO:0015671(oxygen transport);GO:0005344(oxygen carrier activity);GO:0019825(oxygen binding);GO:0020037(heme binding);GO:0006810(transport);GO:0005506(iron ion binding);GO:0046872(metal ion binding);GO:0030492(hemoglobin binding);GO:0005623(cell);GO:0005615(extracellular space);GO:0005615(extracellular space)	NA	NA	NA	Hemoglobin subunit beta [Source:UniProtKB/Swiss-Prot;Acc:P02112]	34.2053	34.2416	28.3496	28.3628	17.4465	6.02998	13.78	6.45838	4.94445	2.94418	5.09974	0.782286	0.784393	1.97629	1.98054	1.3194	1.9273
ENSGALG00000007905	LAMB1	ENSGALT00000012832	GO:0070062(extracellular exosome);GO:0043259(laminin-10 complex);GO:0043257(laminin-8 complex);GO:0031012(extracellular matrix);GO:0005615(extracellular space);GO:0005606(laminin-1 complex);GO:0005607(laminin-2 complex);GO:0005604(basement membrane);GO:0035987(endodermal cell differentiation);GO:0034446(substrate adhesion-dependent cell spreading);GO:0031175(neuron projection development);GO:0030…	NA	NA	NA	laminin subunit beta 1 [Source:HGNC Symbol;Acc:HGNC:6486]	222.09	219.916	210.336	462.906	438.913	212.239	232.447	219.898	90.2816	69.9618	95.1913	47.013	43.3829	37.7561	32.7415	44.926	68.4232
ENSGALG00000043572	FAM89A	ENSGALT00000075302	NA	NA	NA	NA	family with sequence similarity 89 member A [Source:HGNC Symbol;Acc:HGNC:25057]	47.359	36.3966	43.0696	15.4424	15.8864	7.13995	5.04562	6.99936	5.96087	5.17567	4.11615	5.34638	5.57938	2.7356	5.12803	6.51241	4.75278
ENSGALG00000032874		ENSGALT00000065140	NA	NA	NA	NA		11.524	10.0283	14.0997	5.04934	4.89376	0.976262	1.1862	1.2802	0.288957	0.130837	0.317405	0.207288	0.130326	0.121684	0.164	0	0.177927
ENSGALG00000008609	PTK7	ENSGALT00000014020;ENSGALT00000059824	GO:0060071(Wnt signaling pathway, planar cell polarity pathway);GO:0060026(convergent extension);GO:1904929(coreceptor activity involved in Wnt signaling pathway, planar cell polarity pathway);GO:0018108(peptidyl-tyrosine phosphorylation);GO:0001736(establishment of planar polarity);GO:0016055(Wnt signaling pathway);GO:0005887(integral component of plasma membrane);GO:0004713(protein tyrosine kin…	NA	NA	NA	protein tyrosine kinase 7 (inactive) [Source:HGNC Symbol;Acc:HGNC:9618]	71.1861	67.9138	64.1218	37.2044	34.6679	19.5205	22.8814	19.0946	5.98097	3.51826	4.66926	5.62948	4.74494	12.7471	5.49179	7.41207	9.11261
ENSGALG00000015795	ADAMTS5	ENSGALT00000025470	GO:0005615(extracellular space);GO:0042742(defense response to bacterium);GO:0050840(extracellular matrix binding);GO:0008201(heparin binding);GO:0008237(metallopeptidase activity);GO:0004222(metalloendopeptidase activity);GO:0006508(proteolysis);GO:0046872(metal ion binding);GO:0008270(zinc ion binding)	NA	NA	NA	ADAM metallopeptidase with thrombospondin type 1 motif 5 [Source:HGNC Symbol;Acc:HGNC:221]	51.1651	38.9408	49.7624	25.3943	26.6975	22.281	20.8916	21.7535	8.22645	11.4699	10.3747	5.3359	2.79502	4.76171	2.49898	3.89364	5.07365
ENSGALG00000014554	ATN1	ENSGALT00000082612;ENSGALT00000064235	GO:0016363(nuclear matrix);GO:0051402(neuron apoptotic process);GO:0000122(negative regulation of transcription from RNA polymerase II promoter);GO:0005634(nucleus);GO:0005654(nucleoplasm);GO:0019904(protein domain specific binding);GO:0003714(transcription corepressor activity);GO:0003714(transcription corepressor activity)	NA	NA	NA	atrophin 1 [Source:HGNC Symbol;Acc:HGNC:3033]	20.3886	20.4021	21.7541	14.5446	14.1061	8.90219	18.0746	8.93138	1.95291	1.78616	1.83951	1.19858	1.14502	2.93915	0.808973	0.995985	1.49598
ENSGALG00000004701		ENSGALT00000007488	GO:0005634(nucleus);GO:0006334(nucleosome assembly)	NA	NA	NA		92.6757	101.141	108.398	40.4966	42.7917	37.8069	34.5359	32.0601	18.2018	14.6866	12.7127	19.5899	15.3335	22.0479	18.1706	17.0867	13.2564
ENSGALG00000016862	KDELC1	ENSGALT00000027240	GO:0005788(endoplasmic reticulum lumen);GO:0006664(glycolipid metabolic process);GO:0046527(glucosyltransferase activity)	NA	NA	NA	KDEL motif containing 1 [Source:HGNC Symbol;Acc:HGNC:19350]	44.162	44.0334	33.6798	27.7847	24.5809	17.525	10.4333	13.3121	6.64774	5.12378	4.60755	4.23735	4.92191	5.13304	4.0773	5.78313	3.23545
ENSGALG00000014737	KIF2A	ENSGALT00000023766;ENSGALT00000060109;ENSGALT00000047115	GO:0005874(microtubule);GO:0007018(microtubule-based movement);GO:0008017(microtubule binding);GO:0003777(microtubule motor activity);GO:0003774(motor activity);GO:0005524(ATP binding);GO:0000166(nucleotide binding);GO:0005813(centrosome);GO:0000922(spindle pole);GO:0005814(centriole);GO:0016020(membrane);GO:0007052(mitotic spindle organization);GO:0005634(nucleus);GO:0005730(nucleolus);GO:009030…	NA	NA	NA	kinesin family member 2A [Source:HGNC Symbol;Acc:HGNC:6318]	46.1999	41.2392	40.6661	19.0161	17.474	14.0421	11.7289	13.3744	5.31226	4.41561	2.70733	6.20058	5.2089	4.93318	6.12623	4.48647	2.51304
ENSGALG00000037711		ENSGALT00000068419	NA	NA	NA	NA		89.8954	68.81	87.9689	64.9455	58.9388	51.1056	42.7466	51.8192	23.3103	23.0592	19.558	13.2494	11.7467	15.5339	12.3607	15.9792	13.587
ENSGALG00000036539	EFNB1	ENSGALT00000056170	GO:0005634(nucleus);GO:0005737(cytoplasm);GO:0005886(plasma membrane);GO:0070062(extracellular exosome);GO:0007411(axon guidance);GO:0001755(neural crest cell migration);GO:0045121(membrane raft);GO:0042102(positive regulation of T cell proliferation);GO:0046875(ephrin receptor binding);GO:0009880(embryonic pattern specification);GO:0031295(T cell costimulation)	NA	NA	NA	ephrin B1 [Source:HGNC Symbol;Acc:HGNC:3226]	86.0017	80.6546	86.3711	66.5048	66.0509	31.5608	41.651	27.3496	8.42338	11.2723	12.9489	18.2509	10.7096	16.9672	10.8206	13.6982	14.8803
ENSGALG00000012044	ANK2	ENSGALT00000081122;ENSGALT00000019661;ENSGALT00000046421	GO:0043034(costamere);GO:0098910(regulation of atrial cardiac muscle cell action potential);GO:0030507(spectrin binding);GO:0007165(signal transduction);GO:0019899(enzyme binding);GO:0019901(protein kinase binding);GO:0044325(ion channel binding);GO:0002027(regulation of heart rate);GO:0003283(atrial septum development);GO:0010628(positive regulation of gene expression);GO:0010881(regulation of c…	NA	NA	NA	ankyrin 2 [Source:HGNC Symbol;Acc:HGNC:493]	79.6319	72.4856	75.1859	88.5343	102.892	130.217	81.9867	68.0533	21.5738	16.4572	18.0489	20.4743	20.8579	14.0262	9.199	13.4023	10.95
ENSGALG00000002515	OLFM1	ENSGALT00000073894;ENSGALT00000003964;ENSGALT00000089302	GO:0043204(perikaryon);GO:0043025(neuronal cell body);GO:0044295(axonal growth cone);GO:0030424(axon);GO:0060317(cardiac epithelial to mesenchymal transition);GO:0010718(positive regulation of epithelial to mesenchymal transition);GO:0022900(electron transport chain);GO:0009055(electron carrier activity);GO:0020037(heme binding);GO:0045202(synapse);GO:0030054(cell junction);GO:0010629(negative re…	NA	NA	NA	olfactomedin 1 [Source:HGNC Symbol;Acc:HGNC:17187]	16.209	13.3255	17.0895	11.2872	7.82949	3.46316	5.82684	5.93523	0.532862	0.400669	0.769411	1.11873	0.758444	0.967305	0.595942	1.79883	0.633478
ENSGALG00000013002	DAP1	ENSGALT00000021234	NA	NA	NA	NA	death associated protein [Source:HGNC Symbol;Acc:HGNC:2672]	63.7992	61.5757	61.2754	68.0812	65.6017	18.3211	21.1733	21.6258	7.94217	6.33225	4.43432	9.89023	7.30459	15.3977	5.50817	7.26757	2.73207
ENSGALG00000007332	PRICKLE2	ENSGALT00000011865	GO:0046872(metal ion binding);GO:0008270(zinc ion binding);GO:0005737(cytoplasm)	04310(Wnt signaling pathway)	K04511	NA	prickle planar cell polarity protein 2 [Source:HGNC Symbol;Acc:HGNC:20340]	13.2328	12.93	13.2768	13.1968	13.4262	4.25078	6.09211	6.22784	1.02766	1.35323	1.38322	1.25597	0.955346	1.99864	0.551796	0.513392	1.21223
ENSGALG00000007837	KAZALD1	ENSGALT00000012719;ENSGALT00000075446	GO:0001558(regulation of cell growth);GO:0005520(insulin-like growth factor binding);GO:0005576(extracellular region);GO:0005578(proteinaceous extracellular matrix);GO:0030198(extracellular matrix organization);GO:0005614(interstitial matrix);GO:0005614(interstitial matrix)	NA	NA	NA	Kazal type serine peptidase inhibitor domain 1 [Source:HGNC Symbol;Acc:HGNC:25460]	54.2863	56.0694	59.7067	35.2711	32.084	8.72713	14.4265	10.9741	2.42239	2.05686	2.80928	2.06724	1.38983	3.41601	0.941584	1.69997	4.86407
ENSGALG00000029512	SPTBN1	ENSGALT00000086049;ENSGALT00000057896;ENSGALT00000068343;ENSGALT00000076738	NA	NA	NA	NA	spectrin beta, non-erythrocytic 1 [Source:HGNC Symbol;Acc:HGNC:11275]	174.837	191.124	193.112	128.49	122.09	85.581	79.8354	93.7912	40.268	33.0812	31.7226	35.6698	33.4262	34.2483	38.781	38.1244	32.139
ENSGALG00000030902		ENSGALT00000056075	NA	04520(Adherens junction)	K05706	NA		14.6012	16.3522	15.6162	9.82731	7.48425	4.12506	3.20475	4.51643	1.36286	0.842997	0.780485	1.42699	0.964734	1.80113	0.662475	0.882519	1.37488
ENSGALG00000008124		ENSGALT00000013188;ENSGALT00000084837	NA	NA	NA	NA		45.2902	47.0114	49.178	23.3649	25.3119	15.0227	15.1531	14.4322	6.55641	5.06039	6.84461	7.40672	9.1614	10.0887	7.97461	5.79379	7.54367
ENSGALG00000004812	FAM129A	ENSGALT00000007683;ENSGALT00000064776	GO:0001934(positive regulation of protein phosphorylation);GO:0005737(cytoplasm);GO:0016020(membrane);GO:0034976(response to endoplasmic reticulum stress);GO:0001933(negative regulation of protein phosphorylation);GO:0005829(cytosol);GO:0005886(plasma membrane);GO:0070062(extracellular exosome);GO:0045727(positive regulation of translation);GO:0045727(positive regulation of translation)	NA	NA	NA	protein Niban [Source:RefSeq peptide;Acc:NP_001012614]	69.3618	64.1158	55.5372	39.0639	37.5904	13.7676	19.7946	16.3061	5.96404	3.66752	4.92821	7.70095	7.01487	10.7879	5.6684	9.20216	3.01259
ENSGALG00000030377	MDFI	ENSGALT00000067760	NA	NA	NA	NA	MyoD family inhibitor [Source:HGNC Symbol;Acc:HGNC:6967]	46.0488	35.3392	37.7434	42.257	38.7994	4.67496	5.72713	4.60596	0.756231	0	0.537055	1.54738	0.803854	0.834875	0.330394	1.1864	0.530062
ENSGALG00000015001	LAMA4	ENSGALT00000024193	GO:0005615(extracellular space);GO:0005605(basal lamina);GO:0005604(basement membrane);GO:0001568(blood vessel development);GO:0045995(regulation of embryonic development);GO:0030334(regulation of cell migration);GO:0030155(regulation of cell adhesion);GO:0007155(cell adhesion);GO:0005102(receptor binding)	04512(ECM-receptor interaction);04510(Focal adhesion)	K06241	NA	laminin subunit alpha 4 [Source:HGNC Symbol;Acc:HGNC:6484]	56.7858	50.8752	50.343	142.99	135.625	53.3912	53.8286	50.791	29.7446	19.4318	25.3375	19.3119	16.1189	12.7504	7.11056	13.875	9.80557
ENSGALG00000041093	MMP24	ENSGALT00000057521	NA	NA	NA	NA	matrix metallopeptidase 24 [Source:HGNC Symbol;Acc:HGNC:7172]	21.8683	21.7914	21.0223	14.2762	13.8785	7.03562	5.59086	7.42823	2.09827	1.87697	1.71143	1.794	1.45139	1.87284	4.53961	2.18062	1.98099
ENSGALG00000011630	GLI2	ENSGALT00000018998;ENSGALT00000069664;ENSGALT00000063126;ENSGALT00000085622	GO:0003676(nucleic acid binding);GO:0006366(transcription from RNA polymerase II promoter);GO:0000978(RNA polymerase II core promoter proximal region sequence-specific DNA binding);GO:0001077(transcriptional activator activity, RNA polymerase II core promoter proximal region sequence-specific binding);GO:0003677(DNA binding);GO:0003682(chromatin binding);GO:0003700(transcription factor activity, …	04340(Hedgehog signaling pathway);04340(Hedgehog signaling pathway)	K16798	NA	GLI family zinc finger 2 [Source:HGNC Symbol;Acc:HGNC:4318]	25.545	34.0995	31.9654	8.15096	14.1114	4.53157	7.8079	6.76738	2.43258	0.816209	1.42036	1.07942	1.02898	2.05299	0.771423	1.47651	2.27431
ENSGALG00000036775	SETBP1	ENSGALT00000066139;ENSGALT00000064862;ENSGALT00000074858;ENSGALT00000077438	NA	NA	NA	NA	SET binding protein 1 [Source:HGNC Symbol;Acc:HGNC:15573]	26.9268	27.4387	26.5019	24.8817	25.8333	10.3638	16.3626	17.9819	5.14787	4.37118	3.466	4.23322	4.60786	4.86037	2.76016	2.57686	1.08151
ENSGALG00000012640	TMEM263	ENSGALT00000020629	NA	NA	NA	NA	transmembrane protein 263 [Source:HGNC Symbol;Acc:HGNC:28281]	56.1462	51.4068	55.3198	36.7559	40.8125	20.4057	19.0288	18.5644	10.0021	7.48874	6.07422	8.66266	7.5806	9.8452	11.2714	13.099	7.90875
ENSGALG00000014813	HOMER1	ENSGALT00000023918;ENSGALT00000070212	GO:0035256(G-protein coupled glutamate receptor binding);GO:0005737(cytoplasm);GO:0030018(Z disc);GO:0016020(membrane);GO:0005886(plasma membrane);GO:0045177(apical part of cell);GO:0043005(neuron projection);GO:0044325(ion channel binding);GO:0030424(axon);GO:0090279(regulation of calcium ion import);GO:0048741(skeletal muscle fiber development);GO:0014069(postsynaptic density);GO:0048148(behavi…	04068(FoxO signaling pathway);04068(FoxO signaling pathway)	K15010	NA	homer scaffolding protein 1 [Source:HGNC Symbol;Acc:HGNC:17512]	15.8341	18.3292	16.6852	38.5031	46.3766	20.2255	20.4183	28.8971	5.59353	4.20713	3.08263	3.86004	1.84368	1.85825	3.61406	3.2824	2.79372
ENSGALG00000004986	CERCAM	ENSGALT00000007990	GO:0007155(cell adhesion);GO:0016021(integral component of membrane);GO:0016020(membrane)	NA	NA	NA	cerebral endothelial cell adhesion molecule [Source:HGNC Symbol;Acc:HGNC:23723]	45.3474	36.4218	41.5707	62.8979	60.3578	16.3089	30.9168	22.9381	4.25449	2.54156	7.42311	6.40892	4.74181	6.29595	1.95067	4.25982	2.56184
ENSGALG00000021520	MYMK	ENSGALT00000034784	GO:0005886(plasma membrane);GO:0045026(plasma membrane fusion);GO:0043403(skeletal muscle tissue regeneration);GO:0014905(myoblast fusion involved in skeletal muscle regeneration);GO:0007520(myoblast fusion);GO:0016021(integral component of membrane);GO:0016020(membrane)	NA	NA	NA	myomaker, myoblast fusion factor [Source:HGNC Symbol;Acc:HGNC:33778]	25.3547	25.1624	22.503	4.85036	5.36462	2.30991	1.47142	2.23574	4.43902	2.79617	3.95029	1.00049	1.32372	2.30043	0.455326	0.50514	1.06596
ENSGALG00000041750	ADAMTS9	ENSGALT00000056295;ENSGALT00000051055	GO:0005578(proteinaceous extracellular matrix);GO:0006508(proteolysis);GO:0008237(metallopeptidase activity);GO:0008237(metallopeptidase activity)	NA	NA	NA	ADAM metallopeptidase with thrombospondin type 1 motif 9 [Source:HGNC Symbol;Acc:HGNC:13202]	41.0679	32.5842	36.9118	15.9564	14.4758	26.4293	23.1231	20.6612	6.64569	4.99428	6.1326	5.18475	4.91773	5.74707	5.90868	7.62265	10.5228
ENSGALG00000039903	VSIG10	ENSGALT00000052868;ENSGALT00000055855	NA	NA	NA	NA	V-set and immunoglobulin domain containing 10 [Source:HGNC Symbol;Acc:HGNC:26078]	22.2897	24.7292	22.0505	24.8387	18.0122	13.4439	18.8712	12.3326	3.91915	2.95372	3.03928	3.31626	3.11302	4.36203	3.31965	2.79919	2.11096
ENSGALG00000009755	LRIG3	ENSGALT00000015872;ENSGALT00000080261	GO:0005615(extracellular space);GO:0032474(otolith morphogenesis);GO:0016021(integral component of membrane);GO:0016020(membrane);GO:0016020(membrane)	NA	NA	NA	leucine rich repeats and immunoglobulin like domains 3 [Source:HGNC Symbol;Acc:HGNC:30991]	21.9951	22.5495	21.2311	11.9782	13.0506	7.53946	5.10894	8.87666	4.3747	2.82968	2.78636	2.59901	2.92799	1.41595	1.84441	1.63802	1.20743
ENSGALG00000011170	WIPF3	ENSGALT00000051324;ENSGALT00000069084;ENSGALT00000018212	GO:0003779(actin binding);GO:0003779(actin binding)	NA	NA	NA	WAS/WASL interacting protein family member 3 [Source:HGNC Symbol;Acc:HGNC:22004]	34.1579	57.3405	51.3349	16.3322	12.9903	12.0419	9.75097	12.4051	5.35308	2.50168	3.82049	5.51164	4.58722	4.6325	4.7794	4.01829	2.43176
ENSGALG00000029921	CSRP2	ENSGALT00000087269;ENSGALT00000046957	GO:0030154(cell differentiation);GO:0007275(multicellular organism development);GO:0046872(metal ion binding);GO:0005634(nucleus);GO:0005634(nucleus)	NA	NA	NA	Cysteine and glycine-rich protein 2 [Source:UniProtKB/Swiss-Prot;Acc:P50460]	89.1848	97.3112	101.185	43.8344	46.2866	23.955	23.7664	22.3505	9.87595	5.21435	5.69228	4.5654	4.6238	6.30851	3.79576	7.52249	1.52279
ENSGALG00000000362		ENSGALT00000000491	NA	NA	NA	NA		41.6148	43.2567	35.7826	46.8808	40.9175	13.1124	18.3587	15.2528	3.48681	2.32995	3.91556	3.34819	3.48153	6.11461	1.81548	4.51244	6.06573
ENSGALG00000007886	PAMR1	ENSGALT00000077005;ENSGALT00000088945	GO:0005615(extracellular space);GO:0006508(proteolysis);GO:0004252(serine-type endopeptidase activity);GO:0005509(calcium ion binding);GO:0005509(calcium ion binding)	NA	NA	NA	peptidase domain containing associated with muscle regeneration 1 [Source:HGNC Symbol;Acc:HGNC:24554]	3.58745	2.92945	3.25947	2.59434	1.23993	2.8751	4.73102	3.80801	0.425592	0.667383	0.613572	0.415898	0.367175	0.363744	0.12576	0.198883	0.216437
ENSGALG00000032558	INSC	ENSGALT00000050978;ENSGALT00000054570	NA	NA	NA	NA	INSC, spindle orientation adaptor protein [Source:HGNC Symbol;Acc:HGNC:33116]	23.3076	19.975	19.2368	4.5644	6.87768	2.39083	2.38697	1.52661	0.642082	0.427184	0.541291	0.737848	0.343303	1.17756	0.462469	0.746461	0.119165
ENSGALG00000031129	HMCN1	ENSGALT00000064819;ENSGALT00000053712;ENSGALT00000050362;ENSGALT00000063789;ENSGALT00000056072	NA	NA	NA	NA	hemicentin 1 [Source:HGNC Symbol;Acc:HGNC:19194]	17.0257	15.1155	13.6472	15.053	16.4304	4.36847	5.74766	5.49387	2.1502	1.45635	1.63909	1.86217	2.38778	0.920331	0.712843	1.61913	1.70645
ENSGALG00000022874	RAB31	ENSGALT00000033559	GO:0045335(phagocytic vesicle);GO:0032588(trans-Golgi network membrane);GO:0005769(early endosome);GO:0090382(phagosome maturation);GO:0045055(regulated exocytosis);GO:0043001(Golgi to plasma membrane protein transport);GO:0032869(cellular response to insulin stimulus);GO:0031623(receptor internalization);GO:0019003(GDP binding);GO:0005525(GTP binding);GO:0003924(GTPase activity)	04144(Endocytosis)	K07891	NA	RAB31, member RAS oncogene family [Source:HGNC Symbol;Acc:HGNC:9771]	44.5225	44.1846	42.7728	18.945	20.9797	7.77917	7.81867	9.2358	4.68357	4.72834	4.30576	4.5382	3.90664	8.96696	4.23441	5.83108	4.46721
ENSGALG00000026468	CHSY1	ENSGALT00000045614	GO:0032580(Golgi cisterna membrane);GO:0008376(acetylgalactosaminyltransferase activity);GO:0005794(Golgi apparatus);GO:0016740(transferase activity);GO:0016021(integral component of membrane);GO:0016020(membrane);GO:0016757(transferase activity, transferring glycosyl groups);GO:0047238(glucuronosyl-N-acetylgalactosaminyl-proteoglycan 4-beta-N-acetylgalactosaminyltransferase activity);GO:0002063(…	NA	NA	NA	chondroitin sulfate synthase 1 [Source:HGNC Symbol;Acc:HGNC:17198]	44.8703	47.7557	44.6633	19.2175	19.4652	9.66695	10.4587	10.2367	3.7664	3.26241	4.11753	3.17801	3.81314	9.20119	3.92456	3.65343	5.44695
ENSGALG00000035978	CDCA7L	ENSGALT00000074546	GO:0005634(nucleus);GO:0005829(cytosol);GO:0001650(fibrillar center);GO:0005730(nucleolus);GO:0008284(positive regulation of cell proliferation)	NA	NA	NA	cell division cycle associated 7 like [Source:HGNC Symbol;Acc:HGNC:30777]	37.173	35.0581	42.8887	12.1567	12.3334	9.89426	7.19117	8.28145	1.98075	0.966401	1.10376	2.33446	0.851939	5.07614	1.22991	0.987503	0.780663
ENSGALG00000009670	SGCE	ENSGALT00000015740	GO:0032590(dendrite membrane);GO:0016010(dystrophin-associated glycoprotein complex);GO:0005886(plasma membrane);GO:0005794(Golgi apparatus);GO:0003012(muscle system process);GO:0016012(sarcoglycan complex);GO:0061024(membrane organization);GO:0016021(integral component of membrane);GO:0016020(membrane)	NA	NA	NA	sarcoglycan epsilon [Source:HGNC Symbol;Acc:HGNC:10808]	25.5058	22.932	21.451	19.5025	15.6026	14.3473	12.8359	15.1146	3.52389	2.06817	2.43554	3.72539	2.99553	2.87713	2.0515	2.93628	1.52672
ENSGALG00000004045		ENSGALT00000006438	GO:0005096(GTPase activator activity);GO:0005525(GTP binding);GO:0003924(GTPase activity);GO:0043547(positive regulation of GTPase activity);GO:0046872(metal ion binding)	04144(Endocytosis)	K12491	NA		82.491	103.601	93.9365	57.6044	62.0861	23.2516	30.0633	31.7525	17.3846	16.3801	16.9616	11.2038	14.4563	20.3797	14.7337	18.3161	16.4418
ENSGALG00000003118	ADGRA2	ENSGALT00000081722;ENSGALT00000004926	GO:0007166(cell surface receptor signaling pathway);GO:0004888(transmembrane signaling receptor activity);GO:0007186(G-protein coupled receptor signaling pathway);GO:0007165(signal transduction);GO:0004930(G-protein coupled receptor activity);GO:0004871(signal transducer activity);GO:0016021(integral component of membrane);GO:0016020(membrane);GO:0045765(regulation of angiogenesis);GO:0001525(ang…	NA	NA	NA	adhesion G protein-coupled receptor A2 [Source:HGNC Symbol;Acc:HGNC:17849]	16.4104	17.7287	14.8766	10.6598	11.979	8.74222	16.7274	13.3757	2.6089	2.62254	3.29626	2.14388	2.24388	2.61966	1.54357	2.7114	1.99262
ENSGALG00000042308	FZD3	ENSGALT00000070540	GO:0017147(Wnt-protein binding);GO:0005886(plasma membrane);GO:0060070(canonical Wnt signaling pathway);GO:0042472(inner ear morphogenesis);GO:0016324(apical plasma membrane);GO:0001764(neuron migration);GO:0005737(cytoplasm);GO:0048786(presynaptic active zone);GO:0030165(PDZ domain binding);GO:0042813(Wnt-activated receptor activity);GO:0001736(establishment of planar polarity);GO:0001843(neural…	04310(Wnt signaling pathway);04150(mTOR signaling pathway);04916(Melanogenesis)	K02329	NA	frizzled class receptor 3 [Source:HGNC Symbol;Acc:HGNC:4041]	5.18262	3.61477	4.36443	1.53106	1.49689	2.22163	1.50435	2.11564	0.722658	0.425816	0.443542	0.253962	0.361406	0.237951	0.263081	0.272328	0.24019
ENSGALG00000031893	RALA	ENSGALT00000058644	NA	NA	NA	NA	RAS like proto-oncogene A [Source:HGNC Symbol;Acc:HGNC:9839]	60.9132	55.6283	58.9343	38.781	37.5223	30.3873	18.4451	29.0244	9.60048	7.77833	4.91759	8.73146	6.86931	6.38459	8.20432	5.14224	3.98503
ENSGALG00000031440	PTPRU	ENSGALT00000075185;ENSGALT00000078187	GO:0034394(protein localization to cell surface);GO:0005911(cell-cell junction);GO:0008285(negative regulation of cell proliferation);GO:0004725(protein tyrosine phosphatase activity);GO:0030336(negative regulation of cell migration);GO:0060070(canonical Wnt signaling pathway);GO:0008013(beta-catenin binding);GO:0006470(protein dephosphorylation);GO:0034109(homotypic cell-cell adhesion);GO:009860…	NA	NA	NA	protein tyrosine phosphatase, receptor type U [Source:HGNC Symbol;Acc:HGNC:9683]	28.7285	29.336	23.3209	5.84657	7.48833	11.348	11.5683	9.30369	2.06058	2.10905	3.81088	3.85771	3.10668	2.85328	1.69441	3.70453	2.58757
ENSGALG00000007434	RHBDF1	ENSGALT00000012032	GO:0005789(endoplasmic reticulum membrane);GO:0000139(Golgi membrane);GO:0061136(regulation of proteasomal protein catabolic process);GO:0050709(negative regulation of protein secretion);GO:0050708(regulation of protein secretion);GO:0042058(regulation of epidermal growth factor receptor signaling pathway);GO:0016477(cell migration);GO:0008283(cell proliferation);GO:0006508(proteolysis);GO:001602…	NA	NA	NA	rhomboid 5 homolog 1 [Source:HGNC Symbol;Acc:HGNC:20561]	35.9189	37.9117	42.1957	56.9601	44.7681	31.565	30.5648	25.89	8.37915	9.97448	7.15543	12.077	9.67614	12.4631	8.68113	9.15893	8.32493
ENSGALG00000016545	REPS2	ENSGALT00000026696;ENSGALT00000063515	GO:0005509(calcium ion binding);GO:0005509(calcium ion binding)	NA	NA	NA	RALBP1 associated Eps domain containing 2 [Source:HGNC Symbol;Acc:HGNC:9963]	9.94407	10.0007	9.38356	6.83923	7.0632	12.4647	8.0457	10.4574	2.12153	2.15402	1.81804	1.69621	1.35684	1.80249	1.2042	1.49942	0.662069
ENSGALG00000008873	POLE3	ENSGALT00000040353	GO:0008622(epsilon DNA polymerase complex);GO:0005671(Ada2/Gcn5/Ada3 transcription activator complex);GO:0043966(histone H3 acetylation);GO:0046982(protein heterodimerization activity);GO:0005634(nucleus)	00230(Purine metabolism);00240(Pyrimidine metabolism);03030(DNA replication);03410(Base excision repair);03420(Nucleotide excision repair)	K02326	EC:2.7.7.7	DNA polymerase epsilon 3, accessory subunit [Source:HGNC Symbol;Acc:HGNC:13546]	39.3459	36.6881	37.1248	17.123	15.6565	19.4285	13.5422	14.6487	6.15076	4.57683	4.60562	4.67846	3.59141	6.67425	4.77785	3.66551	2.88726
ENSGALG00000029724	MTURN	ENSGALT00000049998	NA	NA	NA	NA	maturin, neural progenitor differentiation regulator homolog [Source:HGNC Symbol;Acc:HGNC:25457]	23.1593	26.0899	22.3516	15.9159	10.4941	5.07944	4.58346	5.75027	1.44567	0.83827	1.29565	1.67439	1.29482	2.33534	0.482489	0.960214	0.8321
ENSGALG00000020249	RAPGEF2	ENSGALT00000080651;ENSGALT00000051210;ENSGALT00000015423;ENSGALT00000047010;ENSGALT00000076253	GO:0005770(late endosome);GO:0043547(positive regulation of GTPase activity);GO:0030139(endocytic vesicle);GO:0008285(negative regulation of cell proliferation);GO:0031175(neuron projection development);GO:0030552(cAMP binding);GO:0048471(perinuclear region of cytoplasm);GO:0005096(GTPase activator activity);GO:0005923(bicellular tight junction);GO:0005829(cytosol);GO:0005737(cytoplasm);GO:000721…	04010(MAPK signaling pathway);04530(Tight junction);04530(Tight junction)	K08018	NA	Rap guanine nucleotide exchange factor 2 [Source:HGNC Symbol;Acc:HGNC:16854]	53.1188	52.2644	49.7139	34.7998	33.5555	19.0161	21.4032	23.2464	8.02485	9.58936	5.93558	6.44909	6.56742	10.4842	7.42147	10.6169	9.29631
ENSGALG00000042067	SPRY1	ENSGALT00000065925	GO:0005829(cytosol);GO:0005794(Golgi apparatus);GO:0005654(nucleoplasm);GO:0070373(negative regulation of ERK1 and ERK2 cascade);GO:0060449(bud elongation involved in lung branching);GO:0051387(negative regulation of neurotrophin TRK receptor signaling pathway);GO:0046580(negative regulation of Ras protein signal transduction);GO:0043407(negative regulation of MAP kinase activity);GO:0040037(nega…	NA	NA	NA	sprouty RTK signaling antagonist 1 [Source:HGNC Symbol;Acc:HGNC:11269]	138.509	137.196	126.73	82.2496	75.8863	89.6195	76.4077	85.2595	23.5544	20.4021	21.3569	22.3404	17.2222	20.763	31.1621	21.819	39.4524
ENSGALG00000012171	GPR39	ENSGALT00000037868	GO:0007186(G-protein coupled receptor signaling pathway);GO:0007165(signal transduction);GO:0004930(G-protein coupled receptor activity);GO:0004871(signal transducer activity);GO:0016021(integral component of membrane);GO:0016020(membrane)	NA	NA	NA	G protein-coupled receptor 39 [Source:HGNC Symbol;Acc:HGNC:4496]	9.3947	6.55307	6.68619	9.95063	16.1816	8.21795	7.39363	6.86999	0.955538	0.758532	1.38122	1.32582	1.4893	0.970218	0.536127	1.12772	0.585813
ENSGALG00000013935	BCLAF1	ENSGALT00000022585;ENSGALT00000070838;ENSGALT00000062456;ENSGALT00000062593;ENSGALT00000063320	GO:0016607(nuclear speck);GO:0005654(nucleoplasm);GO:0005634(nucleus);GO:2001244(positive regulation of intrinsic apoptotic signaling pathway);GO:2001022(positive regulation of response to DNA damage stimulus);GO:2000144(positive regulation of DNA-templated transcription, initiation);GO:0045892(negative regulation of transcription, DNA-templated);GO:0043620(regulation of DNA-templated transcripti…	NA	NA	NA	BCL2 associated transcription factor 1 [Source:HGNC Symbol;Acc:HGNC:16863]	54.4007	59.196	65.6194	32.9748	34.8272	23.441	28.1536	21.05	9.62609	7.20552	7.42708	7.4709	6.26986	11.6208	8.57684	8.12147	4.53243
ENSGALG00000045305		ENSGALT00000090386	NA	NA	NA	NA		11.7083	11.4766	19.4187	3.68347	3.34798	1.47937	1.50601	1.50479	0.31079	0.528581	0.242776	0.366086	0.783453	0.175163	0.222827	0.073427	0.070258
ENSGALG00000008382	GNAI1	ENSGALT00000066806;ENSGALT00000013655	GO:0005813(centrosome);GO:0005765(lysosomal membrane);GO:0030496(midbody);GO:0051301(cell division);GO:0005737(cytoplasm);GO:0070062(extracellular exosome);GO:0005634(nucleus);GO:0005730(nucleolus);GO:0060236(regulation of mitotic spindle organization);GO:1904778(positive regulation of protein localization to cell cortex);GO:0005622(intracellular);GO:0005886(plasma membrane);GO:0099738(cell corte…	04371(Apelin signaling pathway);04540(Gap junction);04914(Progesterone-mediated oocyte maturation);04916(Melanogenesis);04261(Adrenergic signaling in cardiomyocytes);04261(Adrenergic signaling in cardiomyocytes)	K04630	NA	G protein subunit alpha i1 [Source:HGNC Symbol;Acc:HGNC:4384]	48.6661	44.9632	56.182	21.706	21.2082	16.4921	12.0751	18.5052	6.02224	5.33446	2.84856	5.75188	3.7465	4.83303	6.54753	5.42539	3.38579
ENSGALG00000027887		ENSGALT00000043835	GO:0005581(collagen trimer);GO:0005576(extracellular region)	NA	NA	NA		154.11	168.717	162.714	41.2352	49.0762	33.4579	32.2758	39.4176	11.9213	6.90503	2.89829	8.40213	10.102	3.6526	6.07576	6.85218	2.41464
ENSGALG00000004286	COL13A1	ENSGALT00000061376;ENSGALT00000068687;ENSGALT00000071703;ENSGALT00000006816	GO:0008201(heparin binding);GO:0001763(morphogenesis of a branching structure);GO:0007160(cell-matrix adhesion);GO:0005911(cell-cell junction);GO:0001958(endochondral ossification);GO:0098609(cell-cell adhesion);GO:0098609(cell-cell adhesion)	NA	NA	NA	collagen type XIII alpha 1 chain [Source:HGNC Symbol;Acc:HGNC:2190]	11.2654	9.00315	8.74091	13.7577	12.5901	2.58261	4.29255	4.21552	1.31451	0.623707	0.632264	1.04357	1.11098	0.987849	0.224221	0.252238	0.0529857
ENSGALG00000000839	WNT11	ENSGALT00000001231	GO:0005737(cytoplasm);GO:0005578(proteinaceous extracellular matrix);GO:0005576(extracellular region);GO:1903929(primary palate development);GO:0090272(negative regulation of fibroblast growth factor production);GO:0090090(negative regulation of canonical Wnt signaling pathway);GO:0090037(positive regulation of protein kinase C signaling);GO:0072201(negative regulation of mesenchymal cell prolife…	04310(Wnt signaling pathway);04150(mTOR signaling pathway);04916(Melanogenesis)	K01384	NA	Wnt family member 11 [Source:HGNC Symbol;Acc:HGNC:12776]	16.7098	9.14342	13.4662	1.68357	2.15256	1.10474	1.13206	0.897356	0.351941	0.144492	0.649523	0.384396	0.442838	0.450667	0.128178	0.298176	0.503265
ENSGALG00000005707	IFT20	ENSGALT00000086153;ENSGALT00000009153;ENSGALT00000087792	GO:1902636(kinociliary basal body);GO:0097546(ciliary base);GO:0070062(extracellular exosome);GO:0044292(dendrite terminus);GO:0036064(ciliary basal body);GO:0032420(stereocilium);GO:0032391(photoreceptor connecting cilium);GO:0031514(motile cilium);GO:0030992(intraciliary transport particle B);GO:0005929(cilium);GO:0005902(microvillus);GO:0005813(centrosome);GO:0005814(centriole);GO:0005801(cis-…	NA	NA	NA	intraflagellar transport 20 [Source:HGNC Symbol;Acc:HGNC:30989]	46.0823	44.4944	49.249	28.7613	27.1639	25.3092	19.5095	18.3247	6.20481	2.9594	2.44331	4.74109	3.32101	5.64413	4.74937	3.77212	2.90173
ENSGALG00000009364	PRKCI	ENSGALT00000015251;ENSGALT00000039316	GO:0004697(protein kinase C activity);GO:0005622(intracellular);GO:0046872(metal ion binding);GO:0035556(intracellular signal transduction);GO:0006468(protein phosphorylation);GO:0016740(transferase activity);GO:0005524(ATP binding);GO:0004674(protein serine/threonine kinase activity);GO:0004672(protein kinase activity);GO:0000166(nucleotide binding);GO:0016310(phosphorylation);GO:0016301(kinase …	04144(Endocytosis);04530(Tight junction);04910(Insulin signaling pathway);04910(Insulin signaling pathway)	K06069	EC:2.7.11.13	protein kinase C iota [Source:HGNC Symbol;Acc:HGNC:9404]	29.6132	28.2063	27.9406	17.0314	13.9373	11.8115	10.2407	12.4143	4.73665	4.40287	2.42898	4.13648	3.56878	4.5192	4.55429	3.49405	2.57545
ENSGALG00000010967		ENSGALT00000017852	GO:0005085(guanyl-nucleotide exchange factor activity);GO:0007264(small GTPase mediated signal transduction);GO:0005622(intracellular);GO:0065009(regulation of molecular function)	NA	NA	NA		57.427	52.599	56.1046	33.0509	31.8569	20.5262	19.8925	21.0969	11.376	10.511	9.13363	9.45128	8.54495	12.0371	13.0313	11.0446	14.603
ENSGALG00000008631	TYRO3	ENSGALT00000014067	GO:0070527(platelet aggregation);GO:0070050(neuron cellular homeostasis);GO:0060068(vagina development);GO:0051250(negative regulation of lymphocyte activation);GO:0050728(negative regulation of inflammatory response);GO:0046777(protein autophosphorylation);GO:0045824(negative regulation of innate immune response);GO:0043524(negative regulation of neuron apoptotic process);GO:0043491(protein kina…	NA	NA	NA	TYRO3 protein tyrosine kinase [Source:HGNC Symbol;Acc:HGNC:12446]	22.1526	21.8905	24.5864	21.2072	16.865	9.91191	10.423	9.56667	3.33527	3.47888	3.74046	3.37275	3.55278	6.24505	3.41855	3.96277	4.21033
ENSGALG00000000708	NUCKS1	ENSGALT00000001004	GO:0005737(cytoplasm);GO:0005730(nucleolus);GO:0005634(nucleus);GO:0000790(nuclear chromatin);GO:0000785(chromatin);GO:1990969(modulation by host of viral RNA-binding transcription factor activity);GO:1990968(modulation by host of RNA binding by virus);GO:0071481(cellular response to X-ray);GO:0060382(regulation of DNA strand elongation);GO:0046628(positive regulation of insulin receptor signalin…	NA	NA	NA	nuclear casein kinase and cyclin dependent kinase substrate 1 [Source:HGNC Symbol;Acc:HGNC:29923]	138.146	155.691	151.288	67.8402	71.218	40.4019	50.0444	43.3662	23.1724	14.3196	14.3006	23.1403	14.7901	19.4578	18.5357	21.7174	9.40037
ENSGALG00000030050		ENSGALT00000058565	NA	NA	NA	NA		14.9775	15.7891	15.1052	13.1731	17.8178	15.834	14.9518	14.9811	2.57373	1.49566	1.25754	0.750754	0.558427	0.924609	0.805041	1.01181	1.11274
ENSGALG00000011116	VRK1	ENSGALT00000058097;ENSGALT00000018109	GO:0005829(cytosol);GO:0005795(Golgi stack);GO:0005730(nucleolus);GO:0005654(nucleoplasm);GO:0005634(nucleus);GO:0090166(Golgi disassembly);GO:0072355(histone H3-T3 phosphorylation);GO:0046777(protein autophosphorylation);GO:0043987(histone H3-S10 phosphorylation);GO:0006468(protein phosphorylation);GO:0072354(histone kinase activity (H3-T3 specific));GO:0035175(histone kinase activity (H3-S10 sp…	NA	NA	NA	vaccinia related kinase 1 [Source:HGNC Symbol;Acc:HGNC:12718]	16.4791	14.4898	16.2532	5.90075	6.4352	3.43853	1.82614	2.31636	0.874393	0.518688	0.510745	0.721375	0.667469	2.01817	0.752101	0.647253	0.506843
ENSGALG00000010661	CDKN2AIP	ENSGALT00000017346	GO:0005730(nucleolus);GO:0005654(nucleoplasm);GO:0001652(granular component);GO:0005634(nucleus);GO:0031647(regulation of protein stability);GO:0030308(negative regulation of cell growth);GO:0009967(positive regulation of signal transduction);GO:0030307(positive regulation of cell growth);GO:0006974(cellular response to DNA damage stimulus);GO:0002039(p53 binding);GO:0007165(signal transduction);…	NA	NA	NA	CDKN2A interacting protein [Source:HGNC Symbol;Acc:HGNC:24325]	34.3414	32.3061	34.6206	17.7841	18.5155	15.1086	11.9255	12.6528	4.98243	5.61042	4.79048	4.96504	5.11962	6.65218	5.7516	4.49052	4.45961
ENSGALG00000007952	AMOT	ENSGALT00000012914	GO:0031410(cytoplasmic vesicle);GO:0030139(endocytic vesicle);GO:0030027(lamellipodium);GO:0009897(external side of plasma membrane);GO:0008180(COP9 signalosome);GO:0005923(bicellular tight junction);GO:0001726(ruffle);GO:0005884(actin filament);GO:0051056(regulation of small GTPase mediated signal transduction);GO:0048514(blood vessel morphogenesis);GO:0043534(blood vessel endothelial cell migra…	04530(Tight junction)	K16819	NA	angiomotin [Source:HGNC Symbol;Acc:HGNC:17810]	30.444	22.9865	29.1519	18.6071	16.1121	12.6112	11.8527	11.8145	5.85682	5.46707	5.03406	4.84492	4.34827	5.98505	6.54214	5.16646	5.43656
ENSGALG00000041094	SYT1	ENSGALT00000059750	GO:0043005(neuron projection);GO:0042584(chromaffin granule membrane);GO:0042734(presynaptic membrane);GO:0031045(dense core granule);GO:0030672(synaptic vesicle membrane);GO:0030658(transport vesicle membrane);GO:0030141(secretory granule);GO:0030424(axon);GO:0008021(synaptic vesicle);GO:0005794(Golgi apparatus);GO:1903861(positive regulation of dendrite extension);GO:0098746(fast, calcium ion-d…	NA	NA	NA	Synaptotagmin-1 [Source:UniProtKB/Swiss-Prot;Acc:P47191]	3.41844	1.77256	2.51626	1.76716	3.25024	0.676648	0.398643	0.79541	0.038303	0.045176	0.019145	0.099117	0.13789	0.110222	0.081497	0.080085	0.069652
ENSGALG00000017320		ENSGALT00000084986;ENSGALT00000031276;ENSGALT00000069937	GO:0006890(retrograde vesicle-mediated transport, Golgi to ER);GO:0000042(protein targeting to Golgi);GO:0016192(vesicle-mediated transport);GO:0006891(intra-Golgi vesicle-mediated transport);GO:0015031(protein transport);GO:0042147(retrograde transport, endosome to Golgi);GO:0005794(Golgi apparatus);GO:0005829(cytosol);GO:0005525(GTP binding);GO:0003924(GTPase activity);GO:0006810(transport);GO:…	NA	NA	NA	Ras-related protein Rab-6A [Source:UniProtKB/Swiss-Prot;Acc:Q1KME6]	81.4008	83.5202	77.9787	63.8727	66.5226	41.08	36.402	34.6782	15.2404	12.6348	10.7793	17.8699	13.9277	11.7333	16.1422	16.5344	10.9718
ENSGALG00000037717		ENSGALT00000049601;ENSGALT00000057004;ENSGALT00000071479	NA	NA	NA	NA		9.67526	7.60869	8.24594	3.08037	2.49027	0.987328	1.23213	1.73396	0.703759	0.262116	0.4518	0.38094	0.523818	0.142746	0.0669834	0.150127	0.139909
ENSGALG00000004937	VGLL4	ENSGALT00000007902;ENSGALT00000044326	GO:0006355(regulation of transcription, DNA-templated);GO:0006355(regulation of transcription, DNA-templated)	NA	NA	NA	vestigial like family member 4 [Source:HGNC Symbol;Acc:HGNC:28966]	94.4991	102.006	100.222	47.2616	45.1375	26.2033	24.0931	26.1295	18.4859	14.1461	9.97704	14.9755	14.2736	22.512	13.6492	18.3307	13.3058
ENSGALG00000040086	HNRNPK	ENSGALT00000089227;ENSGALT00000060444	GO:0005654(nucleoplasm);GO:0008380(RNA splicing);GO:0005681(spliceosomal complex);GO:0006397(mRNA processing);GO:0030529(intracellular ribonucleoprotein complex);GO:0006396(RNA processing);GO:0003723(RNA binding);GO:0006357(regulation of transcription from RNA polymerase II promoter);GO:0005737(cytoplasm);GO:0003676(nucleic acid binding);GO:0006355(regulation of transcription, DNA-templated);GO:0…	03040(Spliceosome);05168(Herpes simplex infection);05168(Herpes simplex infection)	K12886	NA	Heterogeneous nuclear ribonucleoprotein K [Source:UniProtKB/Swiss-Prot;Acc:Q5ZIQ3]	94.9656	94.7299	101.877	46.6863	52.2236	43.1232	38.0877	45.9322	25.0495	22.863	13.8052	12.3671	13.7059	17.8529	14.5271	13.8162	11.1647
ENSGALG00000043174		ENSGALT00000046349	NA	NA	NA	NA		15.2482	13.6178	14.5499	13.3617	8.36281	2.0153	1.1746	1.71299	0.246544	0.327949	0.552631	0.609482	0.545042	1.70739	0.678187	0.443958	0.436948
ENSGALG00000006598	SORL1	ENSGALT00000081956;ENSGALT00000010639	GO:0005768(endosome);GO:0005615(extracellular space);GO:0005794(Golgi apparatus);GO:0016020(membrane);GO:0070062(extracellular exosome);GO:0001540(amyloid-beta binding);GO:0030169(low-density lipoprotein particle binding);GO:0030306(ADP-ribosylation factor binding);GO:0000042(protein targeting to Golgi);GO:0006605(protein targeting);GO:0006622(protein targeting to lysosome);GO:0006892(post-Golgi …	NA	NA	NA	sortilin-related receptor [Source:RefSeq peptide;Acc:NP_001292089]	5.66901	5.87528	6.3245	3.15521	2.56446	1.20781	1.76404	1.40225	0.575062	0.394134	0.728221	0.57166	0.444137	1.02658	0.364591	0.349056	0.541316
ENSGALG00000029292	PCNA	ENSGALT00000085735;ENSGALT00000050446;ENSGALT00000083492;ENSGALT00000050211	GO:0019985(translesion synthesis);GO:0006281(DNA repair);GO:0006275(regulation of DNA replication);GO:0019899(enzyme binding);GO:0006272(leading strand elongation);GO:0006260(DNA replication);GO:0006298(mismatch repair);GO:0005634(nucleus);GO:0005654(nucleoplasm);GO:0003677(DNA binding);GO:0000701(purine-specific mismatch base pair DNA N-glycosylase activity);GO:0003682(chromatin binding);GO:0003…	03030(DNA replication);03410(Base excision repair);03420(Nucleotide excision repair);03430(Mismatch repair);04110(Cell cycle);04530(Tight junction);04530(Tight junction)	K04802	NA	Proliferating cell nuclear antigen [Source:UniProtKB/Swiss-Prot;Acc:Q9DEA3]	135.558	125.394	137.965	39.9067	41.4249	45.993	38.5892	36.3476	20.5914	13.7958	19.0646	15.606	19.0239	32.7399	17.638	19.7835	16.8833
ENSGALG00000033469	KDM1A	ENSGALT00000077166	GO:0034720(histone H3-K4 demethylation);GO:0034648(histone demethylase activity (H3-dimethyl-K4 specific));GO:0045944(positive regulation of transcription from RNA polymerase II promoter);GO:0050660(flavin adenine dinucleotide binding);GO:0030374(ligand-dependent nuclear receptor transcription coactivator activity);GO:0003682(chromatin binding);GO:0016491(oxidoreductase activity);GO:0006357(regul…	NA	NA	NA	lysine demethylase 1A [Source:HGNC Symbol;Acc:HGNC:29079]	62.1582	60.0969	66.4228	28.3668	28.7551	24.6669	22.3239	22.99	10.4459	9.00577	10.8772	7.7658	8.76376	14.7515	10.1792	10.3131	10.0874
ENSGALG00000011132	RBMS1	ENSGALT00000018146	GO:0003723(RNA binding);GO:0003676(nucleic acid binding)	NA	NA	NA	RNA binding motif single stranded interacting protein 1 [Source:HGNC Symbol;Acc:HGNC:9907]	101.989	104.506	91.1075	78.415	72.3885	43.0325	41.0674	47.0947	15.1305	14.7728	10.6843	21.9796	14.8525	22.988	25.4978	18.5641	23.2699
ENSGALG00000015115	MAMDC2	ENSGALT00000024387;ENSGALT00000073905	GO:0005783(endoplasmic reticulum);GO:0016020(membrane);GO:0016020(membrane)	NA	NA	NA	MAM domain containing 2 [Source:HGNC Symbol;Acc:HGNC:23673]	47.748	53.7991	46.1651	10.3557	9.32788	6.91154	6.96634	6.98723	8.99351	3.5357	3.94884	6.69471	6.00272	4.043	3.62001	5.40849	5.36268
ENSGALG00000033286	ARSJ	ENSGALT00000073907	NA	NA	NA	NA	arylsulfatase family member J [Source:HGNC Symbol;Acc:HGNC:26286]	23.3037	15.0569	16.5841	7.48118	7.98915	5.05678	5.47786	6.05024	1.88807	0.947059	1.56124	1.97436	1.25362	2.15396	0.914787	1.19255	1.73145
ENSGALG00000039284	RCN2	ENSGALT00000088543;ENSGALT00000086068;ENSGALT00000086074;ENSGALT00000064016;ENSGALT00000090240	GO:0005730(nucleolus);GO:0005783(endoplasmic reticulum);GO:0005783(endoplasmic reticulum)	NA	NA	NA	reticulocalbin-2 isoform 2 precursor [Source:RefSeq peptide;Acc:NP_001280159]	61.0572	63.72	66.9173	54.6879	52.4775	25.7234	22.7099	24.9614	11.8577	7.51855	4.66145	8.64188	8.35049	10.2122	7.98192	7.39782	4.03209
ENSGALG00000015593	EPHA7	ENSGALT00000025144;ENSGALT00000078889	GO:0072178(nephric duct morphogenesis);GO:0070372(regulation of ERK1 and ERK2 cascade);GO:0051964(negative regulation of synapse assembly);GO:0050730(regulation of peptidyl-tyrosine phosphorylation);GO:0048755(branching morphogenesis of a nerve);GO:0048671(negative regulation of collateral sprouting);GO:0048013(ephrin receptor signaling pathway);GO:0043525(positive regulation of neuron apoptotic …	NA	NA	NA	EPH receptor A7 [Source:HGNC Symbol;Acc:HGNC:3390]	4.36624	4.86323	4.26719	1.67881	1.7302	1.05761	0.928326	0.653025	0.183195	0.051351	0.131087	0.205291	0.298428	0.162549	0.015626	0.085162	0.087873
ENSGALG00000017248	RAB30	ENSGALT00000027882;ENSGALT00000058808	GO:0043231(intracellular membrane-bounded organelle);GO:0031985(Golgi cisterna);GO:0005802(trans-Golgi network);GO:0005801(cis-Golgi network);GO:0007030(Golgi organization);GO:0005525(GTP binding);GO:0003924(GTPase activity);GO:0003924(GTPase activity)	NA	NA	NA	RAB30, member RAS oncogene family [Source:HGNC Symbol;Acc:HGNC:9770]	47.4907	52.7845	45.4047	48.6536	39.2988	30.0304	29.5716	32.3638	8.86358	10.9954	9.4627	10.856	9.95382	7.86225	9.51452	10.9851	11.3226
ENSGALG00000026736	OGN	ENSGALT00000045074;ENSGALT00000078253	GO:0007409(axonogenesis);GO:0005578(proteinaceous extracellular matrix);GO:0005615(extracellular space);GO:0008083(growth factor activity);GO:0005576(extracellular region);GO:0031012(extracellular matrix);GO:0070062(extracellular exosome);GO:1903561(extracellular vesicle);GO:0010469(regulation of receptor activity);GO:0010469(regulation of receptor activity)	NA	NA	NA	osteoglycin [Source:HGNC Symbol;Acc:HGNC:8126]	113.462	120.284	112.484	129.539	134.499	64.8457	60.5038	71.6281	21.3105	13.0085	10.7176	25.9855	12.0442	7.5533	7.97852	10.7062	7.44371
ENSGALG00000036412	TMEM108	ENSGALT00000057194;ENSGALT00000085237;ENSGALT00000057908	GO:0097484(dendrite extension);GO:0014069(postsynaptic density);GO:0010008(endosome membrane);GO:0005769(early endosome);GO:0030424(axon);GO:0031175(neuron projection development);GO:0006898(receptor-mediated endocytosis);GO:0008090(retrograde axonal transport);GO:0021542(dentate gyrus development);GO:0051388(positive regulation of neurotrophin TRK receptor signaling pathway);GO:0097106(postsynap…	NA	NA	NA	transmembrane protein 108 [Source:HGNC Symbol;Acc:HGNC:28451]	14.7939	13.7862	11.7868	7.70706	5.97856	0.850003	1.37381	1.26864	0.191301	0.0523852	0.20932	0.691058	0.306924	0.104353	0.271435	0.104957	0.0375677
ENSGALG00000015626	RGS12	ENSGALT00000082471	GO:0005829(cytosol);GO:0005634(nucleus);GO:0005730(nucleolus);GO:0030695(GTPase regulator activity)	NA	NA	NA	regulator of G protein signaling 12 [Source:HGNC Symbol;Acc:HGNC:9994]	12.2859	12.1003	11.6719	6.04705	6.20509	4.95195	4.53007	4.18688	1.71099	1.59974	1.37383	1.32358	1.79766	1.58707	1.4881	1.94247	0.975809
ENSGALG00000040770	TNRC18	ENSGALT00000050395;ENSGALT00000047158	GO:0005829(cytosol);GO:0005634(nucleus);GO:0005739(mitochondrion);GO:0031965(nuclear membrane);GO:0031965(nuclear membrane)	NA	NA	NA	trinucleotide repeat containing 18 [Source:HGNC Symbol;Acc:HGNC:11962]	95.5587	95.6574	99.7091	115.239	121.58	63.0379	79.5999	75.4136	30.2576	28.8947	29.5616	22.0698	21.5281	25.0637	21.9847	25.6359	18.9312
ENSGALG00000023670	NAALADL2	ENSGALT00000081787;ENSGALT00000061695;ENSGALT00000075679;ENSGALT00000059348;ENSGALT00000039478	GO:0016021(integral component of membrane);GO:0016020(membrane);GO:0016020(membrane)	NA	NA	NA	N-acetylated alpha-linked acidic dipeptidase like 2 [Source:HGNC Symbol;Acc:HGNC:23219]	11.2499	10.065	10.3226	5.45989	6.37907	2.95376	2.71377	2.07626	0.352651	0.453466	0.512998	0.487174	0.264428	1.02621	0.410215	0.121221	0.112669
ENSGALG00000046316	C17orf105	ENSGALT00000084608	NA	NA	NA	NA	chromosome 17 open reading frame 105 [Source:HGNC Symbol;Acc:HGNC:37241]	19.9903	16.3329	13.7504	4.09193	6.31486	4.01044	3.40974	4.31247	1.3	1.27711	0.497636	1.17583	0.550106	0.58971	0.894535	0.574531	0.490521
ENSGALG00000011605	EPB41L5	ENSGALT00000018952;ENSGALT00000075575	GO:0005886(plasma membrane);GO:0019904(protein domain specific binding);GO:0007492(endoderm development);GO:0001701(in utero embryonic development);GO:0007498(mesoderm development);GO:0032092(positive regulation of protein binding);GO:0031252(cell leading edge);GO:0032525(somite rostral/caudal axis specification);GO:0048339(paraxial mesoderm development);GO:0003382(epithelial cell morphogenesis);…	NA	NA	NA	erythrocyte membrane protein band 4.1 like 5 [Source:HGNC Symbol;Acc:HGNC:19819]	9.05687	10.6537	10.8679	9.14551	7.52446	7.37905	7.68595	9.77342	1.82616	2.2468	1.33207	1.19793	1.24492	1.19671	1.5713	1.29738	1.39908
ENSGALG00000041641	HMG20A	ENSGALT00000075058	NA	NA	NA	NA	high mobility group 20A [Source:HGNC Symbol;Acc:HGNC:5001]	31.525	28.7974	28.2842	15.5704	20.4366	13.1059	10.8377	14.025	6.68658	4.59359	4.39584	5.37461	6.30963	8.12739	3.89599	3.3416	3.10142
ENSGALG00000004288	HDAC4	ENSGALT00000033739;ENSGALT00000069311;ENSGALT00000064969	GO:0045843(negative regulation of striated muscle tissue development);GO:0042113(B cell activation);GO:0030183(B cell differentiation);GO:0006325(chromatin organization);GO:0008134(transcription factor binding);GO:0045892(negative regulation of transcription, DNA-templated);GO:0005515(protein binding);GO:0000118(histone deacetylase complex);GO:0070932(histone H3 deacetylation);GO:0016575(histone …	04371(Apelin signaling pathway);04371(Apelin signaling pathway)	K11406	EC:3.5.1.98	Histone deacetylase 4 [Source:UniProtKB/Swiss-Prot;Acc:P83038]	40.7324	37.6383	40.1635	37.8899	36.9935	30.9434	33.1664	36.4895	12.9711	10.1134	10.571	12.0314	10.7538	12.1062	8.69279	8.8173	7.56834
ENSGALG00000009012	ZNF385B	ENSGALT00000038802	GO:0005634(nucleus);GO:0001650(fibrillar center);GO:0072332(intrinsic apoptotic signaling pathway by p53 class mediator);GO:0002039(p53 binding);GO:0003723(RNA binding);GO:0003676(nucleic acid binding);GO:0046872(metal ion binding);GO:0008270(zinc ion binding)	NA	NA	NA	zinc finger protein 385B [Source:HGNC Symbol;Acc:HGNC:26332]	23.5493	34.2029	33.3005	22.2309	26.1004	2.52718	3.49086	4.28125	2.29659	1.29936	0.823861	0.701936	0.97198	1.53162	0.825634	1.97313	0.361793
ENSGALG00000034044	TBC1D12	ENSGALT00000074219;ENSGALT00000048977	NA	NA	NA	NA	TBC1 domain family member 12 [Source:HGNC Symbol;Acc:HGNC:29082]	40.4258	42.5748	37.5109	23.0975	24.1063	13.8456	14.4452	14.2093	6.9952	6.50047	5.81019	8.11744	6.85857	7.5977	7.27653	6.88455	4.04317
ENSGALG00000016716		ENSGALT00000026974	NA	NA	NA	NA		31.6095	36.4233	29.9021	19.4319	19.6699	15.4648	13.6728	10.2536	5.77694	6.20724	4.2593	4.90008	6.27403	6.06238	5.58247	4.27764	3.20589
ENSGALG00000015598	RASGRF2	ENSGALT00000025150	GO:0005783(endoplasmic reticulum);GO:0046578(regulation of Ras protein signal transduction);GO:0005085(guanyl-nucleotide exchange factor activity);GO:0035023(regulation of Rho protein signal transduction);GO:0005089(Rho guanyl-nucleotide exchange factor activity);GO:0007264(small GTPase mediated signal transduction);GO:0065009(regulation of molecular function);GO:0005088(Ras guanyl-nucleotide exc…	04010(MAPK signaling pathway)	K12326	NA	Ras protein specific guanine nucleotide releasing factor 2 [Source:HGNC Symbol;Acc:HGNC:9876]	4.62552	4.45536	4.14053	11.3963	14.0724	5.28983	4.6266	6.44444	1.35694	1.01045	0.903881	1.17974	1.06578	0.657617	0.752287	1.09631	0.452094
ENSGALG00000008154	SRPK2	ENSGALT00000053364;ENSGALT00000013245	GO:0005829(cytosol);GO:0005737(cytoplasm);GO:0005730(nucleolus);GO:0005654(nucleoplasm);GO:0005634(nucleus);GO:0045071(negative regulation of viral genome replication);GO:0045070(positive regulation of viral genome replication);GO:0035556(intracellular signal transduction);GO:0008380(RNA splicing);GO:0008284(positive regulation of cell proliferation);GO:0006468(protein phosphorylation);GO:0000245…	NA	NA	NA	SRSF protein kinase 2 [Source:HGNC Symbol;Acc:HGNC:11306]	32.9876	35.0334	35.1	20.8018	19.8027	8.90927	5.50467	8.49892	5.84654	5.92522	2.92637	3.82355	4.828	4.24105	3.77817	3.07947	1.94569
ENSGALG00000010079	HP1BP3	ENSGALT00000016382;ENSGALT00000085123	GO:0016607(nuclear speck);GO:0005694(chromosome);GO:0005634(nucleus);GO:0097298(regulation of nucleus size);GO:0071456(cellular response to hypoxia);GO:0070828(heterochromatin organization);GO:0042127(regulation of cell proliferation);GO:0006355(regulation of transcription, DNA-templated);GO:0031491(nucleosome binding);GO:0003677(DNA binding);GO:0003682(chromatin binding);GO:0000786(nucleosome);G…	NA	NA	NA	heterochromatin protein 1 binding protein 3 [Source:HGNC Symbol;Acc:HGNC:24973]	111.707	110.716	123.647	79.9805	71.6236	53.3206	46.268	52.8511	23.2059	20.4108	23.934	27.5403	23.8986	25.6236	22.162	25.9029	16.5939
ENSGALG00000031112	COL5A2	ENSGALT00000054594	GO:0031012(extracellular matrix);GO:0043588(skin development);GO:0001501(skeletal system development);GO:0005615(extracellular space);GO:0005581(collagen trimer);GO:0046332(SMAD binding);GO:0071230(cellular response to amino acid stimulus);GO:0030199(collagen fibril organization);GO:0048592(eye morphogenesis);GO:1903225(negative regulation of endodermal cell differentiation);GO:0005588(collagen t…	NA	NA	NA	collagen type V alpha 2 chain [Source:HGNC Symbol;Acc:HGNC:2210]	186.974	164.331	176.846	216.048	206.742	75.0066	98.3471	102.721	32.7478	22.7612	36.1353	37.7533	25.3218	21.239	14.8376	25.9098	30.8722
ENSGALG00000041993	UGDH	ENSGALT00000052148;ENSGALT00000090339;ENSGALT00000052216;ENSGALT00000067097	GO:0005654(nucleoplasm);GO:0070062(extracellular exosome);GO:0001702(gastrulation with mouth forming second);GO:0003979(UDP-glucose 6-dehydrogenase activity);GO:0006065(UDP-glucuronate biosynthetic process);GO:0051287(NAD binding);GO:0005829(cytosol);GO:0016616(oxidoreductase activity, acting on the CH-OH group of donors, NAD or NADP as acceptor);GO:0005634(nucleus);GO:0055114(oxidation-reduction…	00040(Pentose and glucuronate interconversions);00053(Ascorbate and aldarate metabolism);00520(Amino sugar and nucleotide sugar metabolism);00520(Amino sugar and nucleotide sugar metabolism)	K00012	EC:1.1.1.22	UDP-glucose 6-dehydrogenase [Source:UniProtKB/Swiss-Prot;Acc:Q5F3T9]	94.473	82.581	70.3361	40.3849	43.4796	32.3942	26.9337	28.0833	9.6518	7.69406	9.03285	10.095	8.73704	15.0663	11.9009	10.9762	21.5089
ENSGALG00000002090	GPSM2	ENSGALT00000003258	GO:0097431(mitotic spindle pole);GO:0045177(apical part of cell);GO:0005938(cell cortex);GO:0005829(cytosol);GO:0060487(lung epithelial cell differentiation);GO:0051661(maintenance of centrosome location);GO:0050790(regulation of catalytic activity);GO:0007052(mitotic spindle organization);GO:0000132(establishment of mitotic spindle orientation);GO:0030695(GTPase regulator activity);GO:0042802(id…	NA	NA	NA	G protein signaling modulator 2 [Source:HGNC Symbol;Acc:HGNC:29501]	28.4615	24.2142	29.4096	10.8073	11.5665	9.72324	7.66438	10.2198	5.70715	3.19156	2.57744	3.9876	3.02039	4.25511	2.51936	2.36929	1.65275
ENSGALG00000036829	RECK	ENSGALT00000060231;ENSGALT00000078948	NA	NA	NA	NA	reversion inducing cysteine rich protein with kazal motifs [Source:HGNC Symbol;Acc:HGNC:11345]	29.4243	26.1825	23.781	18.593	23.233	13.1075	10.0214	14.2956	4.1105	3.85028	3.78326	5.05258	4.03874	5.44934	3.34869	4.75259	5.45438
ENSGALG00000041814		ENSGALT00000054818;ENSGALT00000081130;ENSGALT00000070041;ENSGALT00000078077	NA	04145(Phagosome);05132(Salmonella infection);05132(Salmonella infection)	K10414	NA		8.60724	7.8829	8.17173	6.89531	6.87271	4.23404	3.79483	4.3018	1.76619	1.55251	1.20505	1.8678	1.28687	1.38469	1.33965	1.11554	0.655006
ENSGALG00000006531	TRA2B	ENSGALT00000010555;ENSGALT00000055461	GO:0003723(RNA binding);GO:0003676(nucleic acid binding);GO:0003729(mRNA binding);GO:0036002(pre-mRNA binding);GO:0070717(poly-purine tract binding);GO:0000381(regulation of alternative mRNA splicing, via spliceosome);GO:0000398(mRNA splicing, via spliceosome);GO:0021796(cerebral cortex regionalization);GO:0048025(negative regulation of mRNA splicing, via spliceosome);GO:0048026(positive regulati…	03040(Spliceosome);03040(Spliceosome)	K12897	NA	transformer 2 beta homolog [Source:HGNC Symbol;Acc:HGNC:10781]	59.3196	62.1898	69.3301	30.8381	33.5372	19.6965	15.1845	20.5884	9.07774	6.57902	5.60824	8.16819	6.50622	12.8554	8.34758	8.54049	5.52067
ENSGALG00000008049	ARL3	ENSGALT00000053195;ENSGALT00000013061	GO:0007264(small GTPase mediated signal transduction);GO:0005525(GTP binding);GO:0005622(intracellular);GO:0000166(nucleotide binding);GO:0000166(nucleotide binding)	NA	NA	NA	ADP ribosylation factor like GTPase 3 [Source:HGNC Symbol;Acc:HGNC:694]	25.6817	31.9147	32.5728	7.01337	6.0291	6.77833	5.55835	5.03383	4.15157	2.40634	1.76924	1.99265	2.27443	3.02393	2.09454	2.89429	1.59749
ENSGALG00000016312	POLA1	ENSGALT00000026316	GO:0005829(cytosol);GO:0005658(alpha DNA polymerase:primase complex);GO:0005654(nucleoplasm);GO:0005634(nucleus);GO:0006260(DNA replication);GO:0046982(protein heterodimerization activity);GO:0003887(DNA-directed DNA polymerase activity);GO:0001882(nucleoside binding);GO:0006303(double-strand break repair via nonhomologous end joining);GO:0071897(DNA biosynthetic process);GO:0006272(leading stran…	00230(Purine metabolism);00240(Pyrimidine metabolism);03030(DNA replication)	K02320	EC:2.7.7.7	DNA polymerase alpha 1, catalytic subunit [Source:HGNC Symbol;Acc:HGNC:9173]	38.7972	34.9793	35.7775	25.0175	25.6571	17.927	13.7266	17.3022	5.66602	3.26376	2.48349	3.7429	3.4488	7.41491	4.12282	3.46517	2.52697
ENSGALG00000030866	CPQ	ENSGALT00000057104	GO:0042803(protein homodimerization activity);GO:0006508(proteolysis);GO:0005737(cytoplasm);GO:0070062(extracellular exosome);GO:0005615(extracellular space);GO:0043171(peptide catabolic process);GO:0070573(metallodipeptidase activity)	NA	NA	NA	carboxypeptidase Q [Source:HGNC Symbol;Acc:HGNC:16910]	19.7825	16.7502	16.7975	20.4243	20.6933	12.2093	9.06678	8.31558	3.66791	2.87644	2.69012	2.81367	2.02013	3.5379	2.19737	2.62227	1.67998
ENSGALG00000037860		ENSGALT00000079825;ENSGALT00000051407;ENSGALT00000059756	NA	NA	NA	NA		14.0865	13.8458	16.3686	8.8386	6.67595	5.68549	8.27627	9.13576	2.59579	2.88595	3.56844	1.8353	1.85146	2.76531	1.09831	1.51998	0.859071
ENSGALG00000026716	CELF5	ENSGALT00000045397;ENSGALT00000065994;ENSGALT00000049322	GO:0000381(regulation of alternative mRNA splicing, via spliceosome);GO:0003723(RNA binding);GO:0003676(nucleic acid binding);GO:0003676(nucleic acid binding)	NA	NA	NA	CUGBP Elav-like family member 5 [Source:HGNC Symbol;Acc:HGNC:14058]	5.8626	6.99211	5.47166	1.90792	2.0944	0.863413	0.614303	0.746601	0.246079	0.195864	0.143807	0.0667045	0.277454	0.198683	0	0.0520087	0.0622803
ENSGALG00000012228	MDGA2	ENSGALT00000019970	GO:0016020(membrane)	NA	NA	NA	MAM domain containing glycosylphosphatidylinositol anchor 2 [Source:HGNC Symbol;Acc:HGNC:19835]	2.25043	1.74662	2.38207	2.0515	2.25805	1.30111	1.69322	1.57197	0.297961	0.217902	0.141871	0.028206	0.100113	0.026256	0.060177	0.048762	0.064403
ENSGALG00000006221	KIF1A	ENSGALT00000068464;ENSGALT00000053794;ENSGALT00000010045;ENSGALT00000067223	GO:0030705(cytoskeleton-dependent intracellular transport);GO:0005871(kinesin complex);GO:0007018(microtubule-based movement);GO:0016887(ATPase activity);GO:0003777(microtubule motor activity);GO:0008017(microtubule binding);GO:0003774(motor activity);GO:0005524(ATP binding);GO:0000166(nucleotide binding);GO:0042802(identical protein binding);GO:0042802(identical protein binding)	NA	NA	NA	kinesin family member 1A [Source:HGNC Symbol;Acc:HGNC:888]	3.80407	5.27233	5.68007	0.814454	1.07828	0.635836	0.951216	0.595654	0.0511739	0.148684	0.216924	0.0590485	0.0366049	0.185887	0.0722078	0.0907326	0.161033
ENSGALG00000012591	HNRNPK	ENSGALT00000083989;ENSGALT00000063036;ENSGALT00000059545;ENSGALT00000085764;ENSGALT00000074863;ENSGALT00000088876;ENSGALT00000020563	GO:0006396(RNA processing);GO:0003723(RNA binding);GO:0006357(regulation of transcription from RNA polymerase II promoter);GO:0003676(nucleic acid binding);GO:0003677(DNA binding);GO:0045944(positive regulation of transcription from RNA polymerase II promoter);GO:0045296(cadherin binding);GO:0042802(identical protein binding);GO:0005925(focal adhesion);GO:0016020(membrane);GO:0005654(nucleoplasm)…	03040(Spliceosome);05168(Herpes simplex infection);05168(Herpes simplex infection)	K12886	NA	heterogeneous nuclear ribonucleoprotein K [Source:HGNC Symbol;Acc:HGNC:5044]	101.243	113.269	118.039	45.9386	49.2054	43.902	37.9117	34.0473	22.9355	18.9943	15.6203	27.7991	19.1444	26.3061	18.1987	19.6245	15.5664
ENSGALG00000007125	PARD3	ENSGALT00000067041;ENSGALT00000038526;ENSGALT00000059013;ENSGALT00000080314;ENSGALT00000011542	GO:0030054(cell junction);GO:0005923(bicellular tight junction);GO:0005911(cell-cell junction);GO:0005911(cell-cell junction)	04080(Neuroactive ligand-receptor interaction);04144(Endocytosis);04520(Adherens junction);04530(Tight junction);04530(Tight junction)	K04237	NA	par-3 family cell polarity regulator [Source:HGNC Symbol;Acc:HGNC:16051]	22.0761	18.7061	19.5537	17.875	18.1005	9.97031	9.93336	10.2847	5.47426	4.61622	3.97674	4.65276	4.15401	3.64051	5.13785	5.64165	4.39312
ENSGALG00000031684	RCC2	ENSGALT00000073624	GO:0019901(protein kinase binding);GO:0031901(early endosome membrane);GO:0008017(microtubule binding);GO:0030334(regulation of cell migration);GO:0007229(integrin-mediated signaling pathway);GO:0030496(midbody);GO:0003723(RNA binding);GO:0005886(plasma membrane);GO:0005634(nucleus);GO:0016020(membrane);GO:0019904(protein domain specific binding);GO:0048041(focal adhesion assembly);GO:0034260(neg…	NA	NA	NA	regulator of chromosome condensation 2 [Source:HGNC Symbol;Acc:HGNC:30297]	63.5246	62.6745	70.6171	28.7574	29.5307	15.1509	18.8791	17.8293	5.78919	4.28367	5.06362	5.32247	4.71676	15.4989	4.27303	3.95553	5.59423
ENSGALG00000034301		ENSGALT00000070971;ENSGALT00000061042	NA	NA	NA	NA		12.9427	15.1621	12.9219	2.7006	3.38809	2.32454	1.17273	2.04296	0.505783	0.362942	0.868881	0.203126	0.373903	0.639003	0.299647	0.184046	0.391408
ENSGALG00000029382	BARX2B	ENSGALT00000055715	GO:0001228(transcriptional activator activity, RNA polymerase II transcription regulatory region sequence-specific binding);GO:0000977(RNA polymerase II regulatory region sequence-specific DNA binding);GO:0006357(regulation of transcription from RNA polymerase II promoter);GO:0005634(nucleus);GO:0043565(sequence-specific DNA binding);GO:0006355(regulation of transcription, DNA-templated);GO:00063…	NA	NA	NA	BARX homeobox 2 [Source:HGNC Symbol;Acc:HGNC:956]	15.6308	9.96212	15.425	4.04118	4.6374	2.72016	1.54197	1.52366	0.423572	0.098243	0.223276	0	0.116987	0	0.0531	0	0
ENSGALG00000030618		ENSGALT00000064480	NA	NA	NA	NA		66.3215	58.8715	60.7472	39.8453	41.408	25.7924	32.065	17.7535	3.59909	4.85747	7.25684	10.5561	6.79779	10.3749	4.4143	8.05415	7.65595
ENSGALG00000002988	PHGDH	ENSGALT00000004729;ENSGALT00000086512;ENSGALT00000072173	GO:0043209(myelin sheath);GO:0070314(G1 to G0 transition);GO:0031175(neuron projection development);GO:0022008(neurogenesis);GO:0021915(neural tube development);GO:0021782(glial cell development);GO:0021510(spinal cord development);GO:0019530(taurine metabolic process);GO:0010468(regulation of gene expression);GO:0009448(gamma-aminobutyric acid metabolic process);GO:0006566(threonine metabolic pr…	01200(Carbon metabolism);01230(Biosynthesis of amino acids);00260(Glycine, serine and threonine metabolism);00260(Glycine, serine and threonine metabolism)	K00058	EC:1.1.1.95;EC:1.1.1.399	phosphoglycerate dehydrogenase [Source:HGNC Symbol;Acc:HGNC:8923]	3.8797	14.8636	9.32843	13.0066	15.6675	2.48944	3.98723	1.8113	0.652952	0.474795	0.799392	0.390534	0.499101	0.133478	0.163039	0.263191	0.108631
ENSGALG00000004767	ODF2	ENSGALT00000007603;ENSGALT00000073394	GO:0097539(ciliary transition fiber);GO:0005929(cilium);GO:0005814(centriole);GO:0005813(centrosome);GO:0005634(nucleus);GO:0008104(protein localization);GO:0010457(centriole-centriole cohesion);GO:0120103(-);GO:0120103(-)	NA	NA	NA	outer dense fiber of sperm tails 2 [Source:HGNC Symbol;Acc:HGNC:8114]	21.5075	22.1151	24.5533	11.1399	11.14	8.80195	7.68472	7.97358	3.75978	2.29612	1.90761	2.21212	1.28115	3.00301	1.60295	2.2666	1.04198
ENSGALG00000034992	FRMD4A	ENSGALT00000054492;ENSGALT00000059565	GO:0005923(bicellular tight junction);GO:0030674(protein binding, bridging);GO:0090162(establishment of epithelial cell polarity);GO:0090162(establishment of epithelial cell polarity)	NA	NA	NA	FERM domain containing 4A [Source:HGNC Symbol;Acc:HGNC:25491]	47.2452	49.1838	44.7909	33.5605	31.2056	20.4237	26.5586	20.8296	7.59362	5.06737	6.46273	5.86885	5.18801	8.67047	5.438	6.07447	10.207
ENSGALG00000016266	PRRG1	ENSGALT00000026229	GO:0005576(extracellular region);GO:0005509(calcium ion binding);GO:0016021(integral component of membrane);GO:0016020(membrane)	NA	NA	NA	proline rich and Gla domain 1 [Source:HGNC Symbol;Acc:HGNC:9469]	19.3998	18.7017	22.3626	12.6919	10.8977	8.91168	7.77277	8.2204	5.36717	4.01029	3.50108	3.93223	4.4699	3.37576	2.73048	2.91921	2.34684
ENSGALG00000010313	MAST2	ENSGALT00000059141;ENSGALT00000058009;ENSGALT00000061190;ENSGALT00000067334;ENSGALT00000075579;ENSGALT00000077424;ENSGALT00000016788	GO:0045075(regulation of interleukin-12 biosynthetic process);GO:0015630(microtubule cytoskeleton);GO:0007010(cytoskeleton organization);GO:0000287(magnesium ion binding);GO:0004674(protein serine/threonine kinase activity);GO:0035556(intracellular signal transduction);GO:0018105(peptidyl-serine phosphorylation);GO:0008017(microtubule binding);GO:0006468(protein phosphorylation);GO:0016740(transf…	NA	NA	NA	microtubule associated serine/threonine kinase 2 [Source:HGNC Symbol;Acc:HGNC:19035]	48.3244	52.1038	58.0541	51.3067	55.8207	22.96	25.0301	22.3886	11.3643	13.772	11.9072	14.0738	15.3347	11.9859	11.988	13.6955	10.9424
ENSGALG00000005057	ADK	ENSGALT00000076547;ENSGALT00000008109;ENSGALT00000084223	GO:0006166(purine ribonucleoside salvage);GO:0016773(phosphotransferase activity, alcohol group as acceptor);GO:0003723(RNA binding);GO:0004001(adenosine kinase activity);GO:0006167(AMP biosynthetic process);GO:0006175(dATP biosynthetic process);GO:0005634(nucleus);GO:0005654(nucleoplasm);GO:0005829(cytosol);GO:0005829(cytosol)	00230(Purine metabolism);00230(Purine metabolism)	K00856	EC:2.7.1.20	adenosine kinase [Source:HGNC Symbol;Acc:HGNC:257]	80.9654	99.2624	97.9835	82.3695	82.8757	53.7397	46.5242	36.5288	34.3235	25.3475	14.3131	11.6506	9.17584	12.4019	7.35538	12.7898	7.98808
ENSGALG00000037655	BCL9	ENSGALT00000054607	NA	NA	NA	NA	B-cell CLL/lymphoma 9 [Source:HGNC Symbol;Acc:HGNC:1008]	23.8115	25.3046	26.6525	19.2238	17.6594	9.87797	15.9352	13.3282	5.17972	5.44215	5.08038	4.4301	4.15045	3.25283	5.34699	4.17595	5.82374
ENSGALG00000032092	PPP4R1	ENSGALT00000059775;ENSGALT00000079732;ENSGALT00000049790;ENSGALT00000056567	NA	NA	NA	NA	protein phosphatase 4 regulatory subunit 1 [Source:HGNC Symbol;Acc:HGNC:9320]	42.797	41.1122	42.4419	19.3636	19.1297	12.2416	12.2994	13.1549	7.9728	8.43686	7.37648	5.93578	6.50127	9.66558	8.76933	7.61625	8.62091
ENSGALG00000012394	NID2	ENSGALT00000020241	GO:0070062(extracellular exosome);GO:0031012(extracellular matrix);GO:0005886(plasma membrane);GO:0005615(extracellular space);GO:0005604(basement membrane);GO:0005578(proteinaceous extracellular matrix);GO:0007160(cell-matrix adhesion);GO:0005509(calcium ion binding)	NA	NA	NA	nidogen 2 [Source:HGNC Symbol;Acc:HGNC:13389]	164.754	183.85	173.784	124.653	131.77	44.5081	58.0846	57.0878	35.7802	20.2882	30.5586	17.5683	19.444	25.5801	16.404	26.3042	35.6799
ENSGALG00000006045	SH3GL3	ENSGALT00000009738	GO:0070062(extracellular exosome);GO:0042802(identical protein binding);GO:0006897(endocytosis);GO:0005737(cytoplasm)	04144(Endocytosis)	K11247	NA	SH3 domain containing GRB2 like 3, endophilin A3 [Source:HGNC Symbol;Acc:HGNC:10832]	11.6772	11.8014	11.8665	6.5701	6.37667	1.78143	2.92353	2.43463	0.691326	0.972924	0.291958	0.998632	0.693419	0.481823	0.345288	0.280457	0.14853
ENSGALG00000008445	SLC24A3	ENSGALT00000013756	GO:0030955(potassium ion binding);GO:0031402(sodium ion binding);GO:0008273(calcium, potassium:sodium antiporter activity);GO:0005262(calcium channel activity);GO:0005509(calcium ion binding);GO:0035725(sodium ion transmembrane transport);GO:0006874(cellular calcium ion homeostasis);GO:0070588(calcium ion transmembrane transport);GO:0006811(ion transport);GO:0005886(plasma membrane);GO:0005887(in…	NA	NA	NA	solute carrier family 24 member 3 [Source:HGNC Symbol;Acc:HGNC:10977]	24.076	25.6194	26.08	19.8719	23.984	4.27041	5.22555	4.35497	2.84941	1.66647	1.77602	1.09489	1.15602	3.92239	1.74621	1.61458	1.94164
ENSGALG00000005622	ARF5	ENSGALT00000009021;ENSGALT00000076734	GO:0007264(small GTPase mediated signal transduction);GO:0005525(GTP binding);GO:0005622(intracellular);GO:0000166(nucleotide binding);GO:0016477(cell migration);GO:0006471(protein ADP-ribosylation);GO:0031584(activation of phospholipase D activity);GO:0043066(negative regulation of apoptotic process);GO:0045944(positive regulation of transcription from RNA polymerase II promoter);GO:0005829(cyto…	04144(Endocytosis);04144(Endocytosis)	K07940	NA	ADP-ribosylation factor 5 [Source:RefSeq peptide;Acc:NP_990656]	183.903	179.051	203.803	88.6562	108.139	63.9824	51.7901	55.32	31.2102	30.955	30.8259	40.3389	33.9976	50.8216	32.6655	45.2906	41.3596
ENSGALG00000042875	HMGB1	ENSGALT00000075072;ENSGALT00000085332;ENSGALT00000062837	GO:0005694(chromosome);GO:0032147(activation of protein kinase activity);GO:0045087(innate immune response);GO:0006954(inflammatory response);GO:0002376(immune system process);GO:0005737(cytoplasm);GO:0005576(extracellular region);GO:0045859(regulation of protein kinase activity);GO:0005623(cell);GO:0005634(nucleus);GO:0032392(DNA geometric change);GO:0008301(DNA binding, bending);GO:0003677(DNA …	03410(Base excision repair);04140(Autophagy - animal);04217(Necroptosis);04217(Necroptosis)	K10802	NA	High mobility group protein B1 [Source:UniProtKB/Swiss-Prot;Acc:Q9YH06]	164.419	149.599	164.855	63.6154	62.7031	63.555	55.1076	62.1421	26.4398	16.6796	11.6529	20.659	13.0474	26.1726	16.4168	16.3337	8.54555
ENSGALG00000016102	CYP26B1	ENSGALT00000025943	GO:0016125(sterol metabolic process);GO:0004497(monooxygenase activity);GO:0020037(heme binding);GO:0016705(oxidoreductase activity, acting on paired donors, with incorporation or reduction of molecular oxygen);GO:0005506(iron ion binding);GO:0046872(metal ion binding);GO:0055114(oxidation-reduction process);GO:0016491(oxidoreductase activity);GO:0001972(retinoic acid binding);GO:0008401(retinoic…	NA	NA	NA	cytochrome P450 family 26 subfamily B member 1 [Source:HGNC Symbol;Acc:HGNC:20581]	25.9784	31.9617	28.5867	8.08855	8.18606	1.86911	1.88146	2.17426	1.57359	0.281665	1.77747	0.601889	0.457323	1.72138	0.428338	0.373001	0.277585
ENSGALG00000040478	CAPN5	ENSGALT00000047372;ENSGALT00000059025	NA	NA	NA	NA	calpain 5 [Source:HGNC Symbol;Acc:HGNC:1482]	19.6787	22.657	22.0419	12.3937	11.3815	9.43742	11.0049	9.65102	3.07776	4.56919	4.28169	3.72975	3.94824	3.74529	1.90093	3.20461	2.34307
ENSGALG00000032642	SMARCC1	ENSGALT00000077443	GO:0005634(nucleus);GO:0045893(positive regulation of transcription, DNA-templated);GO:0000790(nuclear chromatin);GO:0005737(cytoplasm);GO:0000978(RNA polymerase II core promoter proximal region sequence-specific DNA binding);GO:0005654(nucleoplasm);GO:0045944(positive regulation of transcription from RNA polymerase II promoter);GO:0009887(animal organ morphogenesis);GO:0043234(protein complex);G…	NA	NA	NA	SWI/SNF related, matrix associated, actin dependent regulator of chromatin subfamily c member 1 [Source:HGNC Symbol;Acc:HGNC:11104]	77.2893	86.5214	85.6484	37.0452	42.2627	30.8008	30.11	28.656	11.9176	11.3063	13.7823	12.1296	11.0153	21.8876	12.7977	13.4013	15.4365
ENSGALG00000005584	GALNT18	ENSGALT00000008962	GO:0030246(carbohydrate binding);GO:0006486(protein glycosylation);GO:0005794(Golgi apparatus);GO:0000139(Golgi membrane);GO:0016757(transferase activity, transferring glycosyl groups);GO:0016740(transferase activity);GO:0016021(integral component of membrane);GO:0016020(membrane);GO:0004653(polypeptide N-acetylgalactosaminyltransferase activity);GO:0006493(protein O-linked glycosylation)	00512(Mucin type O-glycan biosynthesis)	K00710	EC:2.4.1.41	polypeptide N-acetylgalactosaminyltransferase 18 [Source:HGNC Symbol;Acc:HGNC:30488]	53.776	50.5369	54.1826	27.3233	24.6116	13.3233	14.516	14.8515	13.8621	9.76589	8.91085	9.46473	9.99246	7.32276	10.0095	9.27197	9.05085
ENSGALG00000011528		ENSGALT00000084833;ENSGALT00000050670;ENSGALT00000075286;ENSGALT00000014014;ENSGALT00000083801;ENSGALT00000075755	GO:0005871(kinesin complex);GO:0003777(microtubule motor activity);GO:0003777(microtubule motor activity)	05132(Salmonella infection);05132(Salmonella infection)	K10407	NA		44.5523	56.4871	49.9064	22.3925	24.4596	10.5681	11.1506	11.8608	7.15849	5.36563	2.96333	7.28613	6.19081	7.243	6.04746	6.96536	3.06478
ENSGALG00000040923	AK8	ENSGALT00000066475	GO:0004127(cytidylate kinase activity);GO:0009142(nucleoside triphosphate biosynthetic process);GO:0006165(nucleoside diphosphate phosphorylation);GO:0004017(adenylate kinase activity);GO:0004550(nucleoside diphosphate kinase activity);GO:0036126(sperm flagellum);GO:0021591(ventricular system development);GO:0005930(axoneme)	00230(Purine metabolism);00730(Thiamine metabolism)	K00939	EC:2.7.4.3	adenylate kinase 8 [Source:HGNC Symbol;Acc:HGNC:26526]	4.26027	5.58828	4.5108	1.9929	2.10438	1.01406	1.08853	0.777622	0.099042	0.142227	0.051665	0.044494	0.036274	0	0.138647	0.162528	0.065655
ENSGALG00000002044		ENSGALT00000003178	NA	NA	NA	NA		16.0186	21.0978	23.7449	12.1649	10.0642	9.32291	10.8548	11.1016	1.98759	2.64967	3.4166	2.19676	2.4848	2.62255	1.89697	1.71451	0.975284
ENSGALG00000011176	SCRN1	ENSGALT00000074882;ENSGALT00000037800;ENSGALT00000085165;ENSGALT00000066828	GO:0031965(nuclear membrane);GO:0005634(nucleus);GO:0016805(dipeptidase activity);GO:0006887(exocytosis);GO:0006508(proteolysis);GO:0006508(proteolysis)	NA	NA	NA	secernin 1 [Source:HGNC Symbol;Acc:HGNC:22192]	11.378	11.8775	10.857	4.60161	6.022	3.09041	1.62521	1.67272	0.681255	0.812881	0.164967	0.600514	0.585632	0.36263	0.248089	0.481526	0.321416
ENSGALG00000011476	SEPT11	ENSGALT00000089292;ENSGALT00000080400;ENSGALT00000064547;ENSGALT00000018712	GO:0070062(extracellular exosome);GO:0001725(stress fiber);GO:0051291(protein heterooligomerization);GO:0005525(GTP binding);GO:0000166(nucleotide binding);GO:0000166(nucleotide binding)	NA	NA	NA	septin 11 [Source:HGNC Symbol;Acc:HGNC:25589]	97.0099	102.842	84.2712	47.8983	51.973	30.2163	30.6673	26.3561	15.0067	17.331	13.6949	14.7152	19.6504	14.758	11.3875	19.5619	20.1142
ENSGALG00000030758		ENSGALT00000057666	NA	NA	NA	NA		80.9593	67.7268	71.7372	41.3277	49.0139	23.4786	29.9403	30.3544	11.587	8.64251	11.2739	15.6725	15.5346	14.3478	9.78519	12.9998	13.6665
ENSGALG00000034502	SCD5	ENSGALT00000063788;ENSGALT00000057780;ENSGALT00000087886;ENSGALT00000064183;ENSGALT00000058782	GO:0006636(unsaturated fatty acid biosynthetic process);GO:0005789(endoplasmic reticulum membrane);GO:0016491(oxidoreductase activity);GO:0004768(stearoyl-CoA 9-desaturase activity);GO:0004768(stearoyl-CoA 9-desaturase activity)	01212(Fatty acid metabolism);01040(Biosynthesis of unsaturated fatty acids);03320(PPAR signaling pathway);03320(PPAR signaling pathway)	K00507	EC:1.14.19.1	stearoyl-CoA desaturase 5 [Source:HGNC Symbol;Acc:HGNC:21088]	12.6518	11.2772	13.319	3.20961	5.4445	3.16503	2.80014	2.91306	0.85166	0.575553	0.786874	0.638973	0.390703	0.622249	0.257581	1.13901	0.713189
ENSGALG00000009145		ENSGALT00000014889;ENSGALT00000082797	GO:0005871(kinesin complex);GO:0007018(microtubule-based movement);GO:0016887(ATPase activity);GO:0003777(microtubule motor activity);GO:0008289(lipid binding);GO:0008289(lipid binding)	NA	NA	NA		34.5281	21.6181	28.2226	36.2069	33.4064	9.59205	17.8935	15.5565	6.08685	4.25631	4.34847	4.47506	3.58835	4.81308	4.82734	4.90366	2.47947
ENSGALG00000043355	CELSR1	ENSGALT00000060656;ENSGALT00000069091	GO:0005654(nucleoplasm);GO:0005886(plasma membrane);GO:0042472(inner ear morphogenesis);GO:0001736(establishment of planar polarity);GO:0001764(neuron migration);GO:0001843(neural tube closure);GO:0001942(hair follicle development);GO:0007266(Rho protein signal transduction);GO:0007626(locomotory behavior);GO:0009952(anterior/posterior pattern specification);GO:0032956(regulation of actin cytoske…	NA	NA	NA	cadherin EGF LAG seven-pass G-type receptor 1 [Source:HGNC Symbol;Acc:HGNC:1850]	29.3765	28.4944	29.3514	18.0813	19.9099	5.94903	5.74232	4.57885	1.88454	2.53736	2.42349	0.663821	0.814143	1.89603	3.75913	1.45748	6.07404
ENSGALG00000030229	CSMD2	ENSGALT00000071991;ENSGALT00000069861	NA	NA	NA	NA	CUB and Sushi multiple domains 2 [Source:HGNC Symbol;Acc:HGNC:19290]	2.87722	2.02092	2.15818	2.28237	2.30648	1.85045	2.05682	1.79583	0.462882	0.400513	0.450463	0.527932	0.491884	0.292918	0.231199	0.250432	0.153994
ENSGALG00000010674	DCTD	ENSGALT00000083514;ENSGALT00000017366;ENSGALT00000055288	GO:0005737(cytoplasm);GO:0016787(hydrolase activity);GO:0046872(metal ion binding);GO:0008270(zinc ion binding);GO:0003824(catalytic activity);GO:0004132(dCMP deaminase activity);GO:0006220(pyrimidine nucleotide metabolic process);GO:0006226(dUMP biosynthetic process);GO:0006231(dTMP biosynthetic process);GO:0042802(identical protein binding);GO:0070062(extracellular exosome);GO:0070062(extracell…	00240(Pyrimidine metabolism);00240(Pyrimidine metabolism)	K01493	EC:3.5.4.12	dCMP deaminase [Source:HGNC Symbol;Acc:HGNC:2710]	28.8779	26.1203	28.8308	9.55251	6.87065	7.24659	3.51902	5.16344	2.70884	0.934199	0.717349	0.781882	1.02933	1.44312	0.583171	0.808333	0.196666
ENSGALG00000017119	TNFRSF19	ENSGALT00000027657;ENSGALT00000058434	GO:0046330(positive regulation of JNK cascade);GO:0043123(positive regulation of I-kappaB kinase/NF-kappaB signaling);GO:0009888(tissue development);GO:0004872(receptor activity);GO:0005886(plasma membrane);GO:0016021(integral component of membrane);GO:0016020(membrane);GO:0016020(membrane)	04060(Cytokine-cytokine receptor interaction);04060(Cytokine-cytokine receptor interaction)	K05155	NA	TNF receptor superfamily member 19 [Source:HGNC Symbol;Acc:HGNC:11915]	38.9188	34.2254	39.5226	28.1681	21.4599	5.90376	6.06186	5.44314	3.67672	2.97137	2.68103	5.51604	0.861226	3.2764	1.02483	1.166	0.507814
ENSGALG00000003941	FUBP3	ENSGALT00000039554;ENSGALT00000057058	GO:0003723(RNA binding);GO:0003676(nucleic acid binding);GO:0006366(transcription from RNA polymerase II promoter);GO:0000978(RNA polymerase II core promoter proximal region sequence-specific DNA binding);GO:0001077(transcriptional activator activity, RNA polymerase II core promoter proximal region sequence-specific binding);GO:0006351(transcription, DNA-templated);GO:0010628(positive regulation …	NA	NA	NA	far upstream element binding protein 3 [Source:HGNC Symbol;Acc:HGNC:4005]	56.245	43.2958	49.9824	36.433	33.2712	28.2223	19.9228	23.982	9.881	7.28124	6.67982	9.44386	6.5379	9.57186	7.45773	8.31845	4.73471
ENSGALG00000006009	PODXL2	ENSGALT00000036247	GO:0050901(leukocyte tethering or rolling);GO:0016021(integral component of membrane);GO:0016020(membrane)	NA	NA	NA	podocalyxin like 2 [Source:HGNC Symbol;Acc:HGNC:17936]	25.3688	33.8074	36.5875	8.04373	12.2041	8.39225	5.02573	6.93186	3.70028	1.87304	2.52188	0.834635	1.8111	2.55711	1.09652	1.34242	2.31182
ENSGALG00000013272	PRMT8	ENSGALT00000021680	GO:0005886(plasma membrane);GO:0034969(histone arginine methylation);GO:0019919(peptidyl-arginine methylation, to asymmetrical-dimethyl arginine);GO:0018216(peptidyl-arginine methylation);GO:0016571(histone methylation);GO:0046982(protein heterodimerization activity);GO:0042803(protein homodimerization activity);GO:0042802(identical protein binding);GO:0035242(protein-arginine omega-N asymmetric …	NA	NA	NA	protein arginine methyltransferase 8 [Source:HGNC Symbol;Acc:HGNC:5188]	11.1839	7.17255	7.83693	11.0336	10.4232	4.13661	4.36325	4.97947	0.838141	0.705412	0.667669	1.09095	0.474422	0.516057	0.572651	0.200614	0.120684
ENSGALG00000008962	MSH2	ENSGALT00000014573	GO:0042771(intrinsic apoptotic signaling pathway in response to DNA damage by p53 class mediator);GO:0010165(response to X-ray);GO:0032302(MutSbeta complex);GO:0032301(MutSalpha complex);GO:0016020(membrane);GO:0005634(nucleus);GO:0000784(nuclear chromosome, telomeric region);GO:0051096(positive regulation of helicase activity);GO:0045910(negative regulation of DNA recombination);GO:0045190(isoty…	03430(Mismatch repair)	K08735	NA	mutS homolog 2 [Source:HGNC Symbol;Acc:HGNC:7325]	41.6289	42.6635	45.5564	11.752	13.466	13.3063	10.9313	11.3543	7.73836	6.2573	4.46068	5.93347	5.63178	8.84131	8.43699	7.11355	6.80914
ENSGALG00000014069	TP53I11	ENSGALT00000030003;ENSGALT00000068249	GO:0016021(integral component of membrane);GO:0016020(membrane);GO:0016020(membrane)	NA	NA	NA	tumor protein p53 inducible protein 11 [Source:HGNC Symbol;Acc:HGNC:16842]	69.6728	51.9766	70.2249	36.6439	40.9808	19.3957	21.0459	19.2684	8.67913	7.52408	10.133	6.14486	8.99026	5.1665	18.8232	10.2287	14.7988
ENSGALG00000012382		ENSGALT00000020216	GO:0005509(calcium ion binding)	NA	NA	NA		34.4116	29.9147	28.4902	65.3317	75.5648	40.3079	34.1982	40.5718	16.1361	9.81985	10.9602	5.31643	8.92144	3.59225	5.32487	8.22035	6.99401
ENSGALG00000006445	ARNT2	ENSGALT00000077401;ENSGALT00000010400;ENSGALT00000046354	GO:0034751(aryl hydrocarbon receptor complex);GO:0045893(positive regulation of transcription, DNA-templated);GO:0005667(transcription factor complex);GO:0014070(response to organic cyclic compound);GO:0009410(response to xenobiotic stimulus);GO:0070491(repressing transcription factor binding);GO:0017162(aryl hydrocarbon receptor binding);GO:0046982(protein heterodimerization activity);GO:0001046…	NA	NA	NA	aryl hydrocarbon receptor nuclear translocator 2 [Source:HGNC Symbol;Acc:HGNC:16876]	14.9049	13.6759	12.6319	7.82013	6.60643	2.9458	2.63947	3.45291	1.31322	1.16832	1.37651	1.14245	1.25485	2.42626	1.01919	1.39737	0.867444
ENSGALG00000016702	PPP2R3B	ENSGALT00000026955	GO:0005509(calcium ion binding)	03015(mRNA surveillance pathway);04261(Adrenergic signaling in cardiomyocytes)	K11583	NA	protein phosphatase 2 regulatory subunit B''beta [Source:HGNC Symbol;Acc:HGNC:13417]	133.388	162.59	150.139	82.4556	94.1954	17.8061	19.1097	19.6684	24.0957	11.1663	8.0817	24.8799	26.7003	12.0928	3.16196	6.94593	1.91967
ENSGALG00000039428		ENSGALT00000050027	NA	NA	NA	NA		27.497	25.4139	31.0377	16.4356	13.4957	9.82724	11.5983	10.4811	2.2957	2.69453	2.0683	1.50244	1.65766	4.164	1.51749	1.42904	2.27581
ENSGALG00000013091		ENSGALT00000021369	GO:0051017(actin filament bundle assembly);GO:0035591(signaling adaptor activity);GO:0003779(actin binding);GO:0009967(positive regulation of signal transduction);GO:0051016(barbed-end actin filament capping)	NA	NA	NA		69.9093	46.4682	61.0566	24.7498	22.3738	8.64715	8.35844	10.5806	9.86408	6.44293	6.62951	6.44407	4.2587	6.35035	6.32446	7.98813	7.78422
ENSGALG00000007623	CACNA1G	ENSGALT00000080696;ENSGALT00000050214;ENSGALT00000081868;ENSGALT00000012332;ENSGALT00000068373	GO:0005891(voltage-gated calcium channel complex);GO:0005886(plasma membrane);GO:0005737(cytoplasm);GO:0086091(regulation of heart rate by cardiac conduction);GO:0086046(membrane depolarization during SA node cell action potential);GO:0086045(membrane depolarization during AV node cell action potential);GO:0086027(AV node cell to bundle of His cell signaling);GO:0086018(SA node cell to atrial car…	04010(MAPK signaling pathway);04020(Calcium signaling pathway);04020(Calcium signaling pathway)	K04854	NA	calcium voltage-gated channel subunit alpha1 G [Source:HGNC Symbol;Acc:HGNC:1394]	4.09149	3.61131	3.86416	1.9155	1.3915	2.18442	2.57009	2.23718	0.600671	0.390297	0.517885	0.390763	0.553112	0.538445	0.256816	0.543548	0.289845
ENSGALG00000003272	KHDRBS1	ENSGALT00000005175;ENSGALT00000065723	GO:0016020(membrane);GO:0005654(nucleoplasm);GO:0005634(nucleus);GO:0048024(regulation of mRNA splicing, via spliceosome);GO:0046833(positive regulation of RNA export from nucleus);GO:0046831(regulation of RNA export from nucleus);GO:0045948(positive regulation of translational initiation);GO:0045892(negative regulation of transcription, DNA-templated);GO:0007166(cell surface receptor signaling p…	NA	NA	NA	KH RNA binding domain containing, signal transduction associated 1 [Source:HGNC Symbol;Acc:HGNC:18116]	61.948	78.0924	69.9896	49.7811	49.3841	30.9835	29.5801	34.2164	16.6212	15.1414	13.0976	15.0685	11.3912	15.516	11.132	11.2553	6.45391
ENSGALG00000040866	P3H2	ENSGALT00000046911;ENSGALT00000068569	GO:0008285(negative regulation of cell proliferation);GO:0032963(collagen metabolic process);GO:0019797(procollagen-proline 3-dioxygenase activity);GO:0005604(basement membrane);GO:0051213(dioxygenase activity);GO:0031418(L-ascorbic acid binding);GO:0016705(oxidoreductase activity, acting on paired donors, with incorporation or reduction of molecular oxygen);GO:0005783(endoplasmic reticulum);GO:0…	NA	NA	NA	Prolyl 3-hydroxylase 2 [Source:UniProtKB/Swiss-Prot;Acc:Q6JHU7]	17.0955	21.457	16.0095	21.5749	19.9328	9.51789	12.9424	11.7617	2.47954	2.55651	3.01696	4.98449	3.30072	3.06996	2.7497	1.99674	3.34328
ENSGALG00000025764	FKBP10	ENSGALT00000045048;ENSGALT00000055179	GO:0000413(protein peptidyl-prolyl isomerization);GO:0005528(FK506 binding);GO:0003755(peptidyl-prolyl cis-trans isomerase activity);GO:0061077(chaperone-mediated protein folding);GO:0016853(isomerase activity);GO:0005737(cytoplasm);GO:0005509(calcium ion binding);GO:0006457(protein folding);GO:0006457(protein folding)	NA	NA	NA	FK506 binding protein 10 [Source:HGNC Symbol;Acc:HGNC:18169]	75.2144	68.3902	76.7189	78.3283	61.4426	15.0416	24.5554	16.5042	6.88827	3.77551	8.78052	9.8513	5.59715	12.8612	2.13644	5.7459	5.93184
ENSGALG00000002099	PFKFB4	ENSGALT00000059925;ENSGALT00000003276;ENSGALT00000048554;ENSGALT00000060362	GO:0046835(carbohydrate phosphorylation);GO:0006000(fructose metabolic process);GO:0006003(fructose 2,6-bisphosphate metabolic process);GO:0003873(6-phosphofructo-2-kinase activity);GO:0008152(metabolic process);GO:0003824(catalytic activity);GO:0005524(ATP binding);GO:0005524(ATP binding)	00051(Fructose and mannose metabolism);00051(Fructose and mannose metabolism)	K19030	EC:2.7.1.105;EC:3.1.3.46	6-phosphofructo-2-kinase/fructose-2,6-biphosphatase 4 [Source:HGNC Symbol;Acc:HGNC:8875]	12.9856	13.3648	14.146	20.9863	23.0803	9.57906	8.57271	10.5917	4.02101	4.6085	3.72664	2.87695	3.8719	3.59538	2.8078	2.95786	2.52366
ENSGALG00000002514	SFPQ	ENSGALT00000003963;ENSGALT00000057988;ENSGALT00000048807	GO:0090575(RNA polymerase II transcription factor complex);GO:0042382(paraspeckles);GO:0031012(extracellular matrix);GO:0016363(nuclear matrix);GO:0005654(nucleoplasm);GO:0005634(nucleus);GO:0000785(chromatin);GO:1902177(positive regulation of oxidative stress-induced intrinsic apoptotic signaling pathway);GO:0070932(histone H3 deacetylation);GO:0051726(regulation of cell cycle);GO:0051276(chromo…	NA	NA	NA	splicing factor proline and glutamine rich [Source:HGNC Symbol;Acc:HGNC:10774]	72.6652	69.8946	78.2183	31.8238	36.1532	30.714	28.3734	26.7047	14.0173	10.9738	9.42199	12.8169	10.9538	19.6359	13.1123	10.616	12.0232
ENSGALG00000006507	CLMP	ENSGALT00000010518	GO:0070062(extracellular exosome);GO:0009986(cell surface);GO:0005923(bicellular tight junction);GO:0005881(cytoplasmic microtubule);GO:0048565(digestive tract development);GO:0016021(integral component of membrane);GO:0016020(membrane)	NA	NA	NA	CXADR like membrane protein [Source:HGNC Symbol;Acc:HGNC:24039]	44.0918	30.2971	40.1687	21.1252	21.6712	7.28249	14.3959	10.127	3.20318	2.11735	4.06173	3.7487	4.18951	6.97208	2.07788	2.35809	3.45725
ENSGALG00000008164		ENSGALT00000013266	GO:0008237(metallopeptidase activity);GO:0004222(metalloendopeptidase activity);GO:0006508(proteolysis);GO:0046872(metal ion binding)	NA	NA	NA		19.88	15.5974	13.8588	10.941	10.4007	4.03866	5.67652	3.98989	0.971833	1.16147	1.53714	1.88079	2.50365	1.28627	0.605875	1.32153	1.23182
ENSGALG00000043583	SCG3	ENSGALT00000062908	GO:0003723(RNA binding)	NA	NA	NA	secretogranin-3 isoform 2 precursor [Source:RefSeq peptide;Acc:NP_001280207]	7.35168	5.45401	6.99306	3.65627	3.88697	1.39896	0.946784	1.52409	0.46317	0.192004	0.155626	0.229897	0.111133	0.248426	0.25688	0.111807	0.040944
ENSGALG00000020561		ENSGALT00000032852	GO:0016021(integral component of membrane);GO:0016020(membrane)	NA	NA	NA		11.9231	11.8909	11.5782	7.87494	7.91146	2.86128	3.8695	4.51785	1.12937	1.37725	0.464618	0.960237	0.663269	0.473966	0.984143	0.894584	0.33049
ENSGALG00000015247	GPR161	ENSGALT00000024600	GO:0007186(G-protein coupled receptor signaling pathway);GO:0007165(signal transduction);GO:0004930(G-protein coupled receptor activity);GO:0004871(signal transducer activity);GO:0016021(integral component of membrane);GO:0016020(membrane);GO:0030819(positive regulation of cAMP biosynthetic process);GO:1901621(negative regulation of smoothened signaling pathway involved in dorsal/ventral neural t…	04340(Hedgehog signaling pathway)	K08439	NA	G protein-coupled receptor 161 [Source:HGNC Symbol;Acc:HGNC:23694]	20.7212	19.5091	18.5634	8.27033	12.1254	5.60934	4.50343	3.9666	0.972389	1.80639	2.02886	1.54678	2.07467	2.95696	1.84211	1.6044	1.64076
ENSGALG00000016691		ENSGALT00000059910;ENSGALT00000036604;ENSGALT00000047584;ENSGALT00000087100;ENSGALT00000086899;ENSGALT00000079540;ENSGALT00000085859;ENSGALT00000048410	GO:0022857(transmembrane transporter activity);GO:0005743(mitochondrial inner membrane);GO:0006810(transport);GO:0055085(transmembrane transport);GO:0016021(integral component of membrane);GO:0016020(membrane);GO:0016020(membrane)	04020(Calcium signaling pathway);04217(Necroptosis);04218(Cellular senescence);05164(Influenza A);05164(Influenza A)	K05863	NA		247.84	269.81	235.15	109.8	128.215	202.816	162.52	148.012	50.0942	36.8485	44.8179	31.9256	26.8082	48.7988	30.1127	42.4575	52.1161
ENSGALG00000042816	TP53BP2	ENSGALT00000047525	GO:0072332(intrinsic apoptotic signaling pathway by p53 class mediator);GO:0051059(NF-kappaB binding);GO:0042802(identical protein binding);GO:0005737(cytoplasm);GO:0005634(nucleus);GO:0048471(perinuclear region of cytoplasm);GO:0002039(p53 binding);GO:1900119(positive regulation of execution phase of apoptosis)	NA	NA	NA	tumor protein p53 binding protein 2 [Source:HGNC Symbol;Acc:HGNC:12000]	40.251	33.4379	36.8759	20.3311	21.174	18.6537	19.6471	19.6527	5.90917	7.59514	5.91315	5.62461	5.24858	6.28859	7.55055	6.96482	11.5016
ENSGALG00000043938		ENSGALT00000087272	NA	03030(DNA replication);03410(Base excision repair);03420(Nucleotide excision repair);03430(Mismatch repair)	K10747	EC:6.5.1.1;EC:6.5.1.6		28.7088	19.4292	22.1653	7.09912	6.04887	5.26933	4.89355	5.04861	2.6166	2.56888	2.76308	1.81929	3.2713	3.86051	1.67638	3.02397	2.3892
ENSGALG00000010836		ENSGALT00000017616;ENSGALT00000063813	GO:0009410(response to xenobiotic stimulus);GO:0034751(aryl hydrocarbon receptor complex);GO:0034753(nuclear aryl hydrocarbon receptor complex);GO:0004874(aryl hydrocarbon receptor activity);GO:0043425(bHLH transcription factor binding);GO:0030522(intracellular receptor signaling pathway);GO:0045893(positive regulation of transcription, DNA-templated);GO:0005667(transcription factor complex);GO:0…	NA	NA	NA		42.4926	35.4064	37.7851	21.9762	20.4268	9.69996	7.16937	8.33383	3.86326	4.73856	3.35086	5.11696	3.93715	11.1209	4.296	5.05018	3.7883
ENSGALG00000015519	ROBO2	ENSGALT00000025020;ENSGALT00000073443;ENSGALT00000055391	GO:0030673(axolemma);GO:0035385(Roundabout signaling pathway);GO:0001822(kidney development);GO:0007411(axon guidance);GO:0016021(integral component of membrane);GO:0016020(membrane);GO:0009986(cell surface);GO:0007420(brain development);GO:0007156(homophilic cell adhesion via plasma membrane adhesion molecules);GO:0050772(positive regulation of axonogenesis);GO:0001657(ureteric bud development);…	NA	NA	NA	roundabout guidance receptor 2 [Source:HGNC Symbol;Acc:HGNC:10250]	15.9364	6.81208	10.0299	2.1413	2.20381	1.17229	1.39153	1.08857	0.111083	0.148622	0.350237	0.265348	0.0348467	0.439436	0.172143	0.201531	0.0812958
ENSGALG00000003699	EBF1	ENSGALT00000029074;ENSGALT00000063697	GO:0007275(multicellular organism development);GO:0006355(regulation of transcription, DNA-templated);GO:0006351(transcription, DNA-templated);GO:0046872(metal ion binding);GO:0005634(nucleus);GO:0003677(DNA binding);GO:0003677(DNA binding)	NA	NA	NA	early B-cell factor 1 [Source:HGNC Symbol;Acc:HGNC:3126]	68.7127	60.4949	68.052	40.3733	36.5002	19.2652	24.138	21.5316	6.48499	5.57659	6.85896	7.80136	6.37276	17.4635	5.517	6.95246	9.01696
ENSGALG00000030603	ANTXR1	ENSGALT00000062293	GO:0009986(cell surface);GO:0031527(filopodium membrane);GO:0005518(collagen binding);GO:0031532(actin cytoskeleton reorganization);GO:0034446(substrate adhesion-dependent cell spreading);GO:0051015(actin filament binding);GO:0070062(extracellular exosome);GO:0001568(blood vessel development);GO:0009897(external side of plasma membrane);GO:0004888(transmembrane signaling receptor activity);GO:002…	04621(NOD-like receptor signaling pathway)	K20909	NA	anthrax toxin receptor 1 [Source:HGNC Symbol;Acc:HGNC:21014]	78.2213	61.9996	66.0065	32.3224	27.8783	8.50171	14.5226	10.0594	4.969	2.45646	5.77005	8.0557	7.42697	4.84737	1.36651	5.50058	2.23343
ENSGALG00000041346	SDF1	ENSGALT00000089222;ENSGALT00000061096;ENSGALT00000066398;ENSGALT00000071958	GO:0045236(CXCR chemokine receptor binding);GO:0030335(positive regulation of cell migration);GO:0042056(chemoattractant activity);GO:0009897(external side of plasma membrane);GO:0060326(cell chemotaxis);GO:0050930(induction of positive chemotaxis);GO:0007411(axon guidance);GO:0050918(positive chemotaxis);GO:0070098(chemokine-mediated signaling pathway);GO:0008009(chemokine activity);GO:0006955(i…	04060(Cytokine-cytokine receptor interaction);04672(Intestinal immune network for IgA production);04672(Intestinal immune network for IgA production)	K10031	NA	C-X-C motif chemokine ligand 12 [Source:HGNC Symbol;Acc:HGNC:10672]	35.1578	41.5518	32.1471	45.5071	42.8726	40.3543	34.7264	34.5642	4.47038	2.46878	4.86781	4.71958	4.82459	12.6088	3.8195	3.53484	1.75337
ENSGALG00000003744	ADAM19	ENSGALT00000005940	GO:0005794(Golgi apparatus);GO:0007507(heart development);GO:0006509(membrane protein ectodomain proteolysis);GO:0017124(SH3 domain binding);GO:0008237(metallopeptidase activity);GO:0004222(metalloendopeptidase activity);GO:0006508(proteolysis);GO:0046872(metal ion binding);GO:0016021(integral component of membrane);GO:0016020(membrane)	NA	NA	NA	ADAM metallopeptidase domain 19 [Source:HGNC Symbol;Acc:HGNC:197]	21.1889	18.4684	15.5852	25.9816	20.8821	3.53045	6.66077	6.20473	2.88421	3.09694	3.61674	2.11566	2.53321	2.02737	0.483537	1.74084	1.49579
ENSGALG00000045805		ENSGALT00000086004	NA	NA	NA	NA		26.1544	25.812	25.2437	22.7413	29.3386	5.60518	7.44793	12.4062	3.28466	3.75253	2.32187	1.10499	2.05558	2.10994	1.91674	1.07764	2.62147
ENSGALG00000005120		ENSGALT00000008222	GO:0060317(cardiac epithelial to mesenchymal transition);GO:0031012(extracellular matrix);GO:0030198(extracellular matrix organization);GO:0005576(extracellular region);GO:0005509(calcium ion binding)	NA	NA	NA		100.785	84.3375	99.7135	73.9565	64.3955	45.2989	49.9917	47.7493	21.3096	22.5208	25.8958	16.6214	12.9913	21.4033	10.6022	18.7241	15.0125
ENSGALG00000006401	OSBPL5	ENSGALT00000010333	GO:0043231(intracellular membrane-bounded organelle);GO:0016020(membrane);GO:0015914(phospholipid transport);GO:0006869(lipid transport);GO:0070273(phosphatidylinositol-4-phosphate binding);GO:0015485(cholesterol binding);GO:0005548(phospholipid transporter activity);GO:0001786(phosphatidylserine binding);GO:0006810(transport);GO:0016021(integral component of membrane)	NA	NA	NA	oxysterol binding protein like 5 [Source:HGNC Symbol;Acc:HGNC:16392]	20.1205	17.3133	24.2845	15.9836	15.02	10.4084	8.74079	9.20256	2.88422	2.38994	2.92978	4.20248	2.73535	4.19411	1.69796	3.00556	3.10125
ENSGALG00000016673	TRAM2	ENSGALT00000026905	GO:0045048(protein insertion into ER membrane);GO:0032964(collagen biosynthetic process);GO:0016021(integral component of membrane);GO:0016020(membrane)	NA	NA	NA	translocation associated membrane protein 2 [Source:HGNC Symbol;Acc:HGNC:16855]	53.4107	52.3588	56.7747	40.7321	47.0982	17.5422	18.6239	19.7929	6.18816	4.14928	8.04539	9.8366	6.35617	14.1142	6.15841	6.57573	8.65479
ENSGALG00000016042	CHAF1B	ENSGALT00000025844	GO:0043234(protein complex);GO:0033186(CAF-1 complex);GO:0005829(cytosol);GO:0005654(nucleoplasm);GO:0000790(nuclear chromatin);GO:0031497(chromatin assembly);GO:0006335(DNA replication-dependent nucleosome assembly)	NA	NA	NA	chromatin assembly factor 1 subunit B [Source:HGNC Symbol;Acc:HGNC:1911]	31.589	26.3375	29.8913	10.1542	9.29569	6.22429	4.7394	5.80604	3.07609	2.21375	1.72141	3.34077	1.77363	5.82561	1.81966	2.41417	1.26699
ENSGALG00000018998	UNC5A	ENSGALT00000029975	GO:0016021(integral component of membrane);GO:0016020(membrane);GO:0033564(anterior/posterior axon guidance)	NA	NA	NA	unc-5 netrin receptor A [Source:HGNC Symbol;Acc:HGNC:12567]	7.50528	5.36502	5.75578	4.03634	5.19493	1.94131	2.27641	1.66124	0.317901	0.220801	0.122482	0.09719	0.179628	0.10548	0.07408	0.349422	0.293307
ENSGALG00000012888	PHLPP1	ENSGALT00000037175	GO:0031965(nuclear membrane);GO:1900744(regulation of p38MAPK cascade);GO:0090036(regulation of protein kinase C signaling);GO:0051898(negative regulation of protein kinase B signaling);GO:0051896(regulation of protein kinase B signaling);GO:0046328(regulation of JNK cascade);GO:0043408(regulation of MAPK cascade);GO:0042981(regulation of apoptotic process);GO:0009649(entrainment of circadian clo…	NA	NA	NA	PH domain and leucine rich repeat protein phosphatase 1 [Source:HGNC Symbol;Acc:HGNC:20610]	20.0945	19.4059	19.1554	13.4738	12.3074	9.72301	9.50549	10.6318	4.58148	4.15785	4.59175	3.49159	3.69513	4.6658	3.74271	4.13256	3.94557
ENSGALG00000017046	POSTN	ENSGALT00000027540;ENSGALT00000036466	GO:0031012(extracellular matrix);GO:0005802(trans-Golgi network);GO:0005615(extracellular space);GO:0005578(proteinaceous extracellular matrix);GO:0071307(cellular response to vitamin K);GO:0030198(extracellular matrix organization);GO:0009888(tissue development);GO:0008593(regulation of Notch signaling pathway);GO:0007155(cell adhesion);GO:0046872(metal ion binding);GO:0008201(heparin binding);G…	NA	NA	NA	periostin [Source:HGNC Symbol;Acc:HGNC:16953]	437.022	379.986	425.227	229.329	241.739	152.1	123.801	142.061	36.9876	33.9037	46.2496	100.272	39.4565	22.9252	25.011	18.0626	24.7038
ENSGALG00000034898	ITPK1	ENSGALT00000066126;ENSGALT00000054340	GO:0032957(inositol trisphosphate metabolic process);GO:0052726(inositol-1,3,4-trisphosphate 5-kinase activity);GO:0052725(inositol-1,3,4-trisphosphate 6-kinase activity);GO:0047325(inositol tetrakisphosphate 1-kinase activity);GO:0000287(magnesium ion binding);GO:0016853(isomerase activity);GO:0046872(metal ion binding);GO:0005622(intracellular);GO:0016740(transferase activity);GO:0005524(ATP bi…	00562(Inositol phosphate metabolism);04070(Phosphatidylinositol signaling system);04070(Phosphatidylinositol signaling system)	K00913	EC:2.7.1.159;EC:2.7.1.134	Inositol-tetrakisphosphate 1-kinase [Source:UniProtKB/Swiss-Prot;Acc:Q5F480]	9.98471	11.9031	10.9885	3.83587	3.71085	2.83401	3.43486	2.78407	1.3073	0.982567	1.00319	1.31206	0.956405	2.54037	1.18127	1.47505	0.959925
ENSGALG00000033505		ENSGALT00000062490	NA	NA	NA	NA		13.9255	16.2293	20.744	7.36617	13.1413	11.07	14.7361	15.2132	2.26506	0.78703	0.976302	0.540361	0.35362	0.060982	0.354254	0.284853	0.125635
ENSGALG00000016444	ODC1	ENSGALT00000026527	GO:0005829(cytosol);GO:0005737(cytoplasm);GO:0042176(regulation of protein catabolic process);GO:0033387(putrescine biosynthetic process from ornithine);GO:0009615(response to virus);GO:0008284(positive regulation of cell proliferation);GO:0001822(kidney development);GO:0042803(protein homodimerization activity);GO:0004586(ornithine decarboxylase activity);GO:0006596(polyamine biosynthetic proces…	00330(Arginine and proline metabolism);00480(Glutathione metabolism)	K01581	EC:4.1.1.17	ornithine decarboxylase 1 [Source:HGNC Symbol;Acc:HGNC:8109]	84.8146	87.6168	77.2666	52.9593	55.7927	24.5048	27.3283	20.7448	18.0213	16.5041	14.3624	17.0034	17.2662	26.2673	16.4828	16.1201	16.9634
ENSGALG00000016810	SH3RF3	ENSGALT00000027141	GO:0046872(metal ion binding)	NA	NA	NA	SH3 domain containing ring finger 3 [Source:HGNC Symbol;Acc:HGNC:24699]	13.2097	13.8888	13.1866	12.747	10.9926	2.58262	3.90581	2.39525	0.798582	2.26248	1.13522	0.827749	1.37426	1.40429	1.2504	1.05519	0.790348
ENSGALG00000013061	PAPD7	ENSGALT00000021321	GO:0031965(nuclear membrane);GO:0005794(Golgi apparatus);GO:0005654(nucleoplasm);GO:0005634(nucleus);GO:0042493(response to drug);GO:0016779(nucleotidyltransferase activity)	03018(RNA degradation)	K03514	EC:2.7.7.19	poly(A) RNA polymerase D7, non-canonical [Source:HGNC Symbol;Acc:HGNC:16705]	35.749	43.2715	45.3175	27.4319	26.8432	22.8795	26.1025	26.9585	9.97581	7.35782	5.91745	8.77636	8.766	6.84116	9.43236	9.83302	9.6856
ENSGALG00000007944	HECW2	ENSGALT00000012904	GO:0072686(mitotic spindle);GO:0030071(regulation of mitotic metaphase/anaphase transition);GO:0043161(proteasome-mediated ubiquitin-dependent protein catabolic process);GO:0042787(protein ubiquitination involved in ubiquitin-dependent protein catabolic process);GO:0061630(ubiquitin protein ligase activity);GO:0005737(cytoplasm);GO:0004842(ubiquitin-protein transferase activity);GO:0016740(transf…	NA	NA	NA	HECT, C2 and WW domain containing E3 ubiquitin protein ligase 2 [Source:HGNC Symbol;Acc:HGNC:29853]	44.5692	41.0351	41.6345	31.0133	30.9151	16.301	16.2769	15.5045	12.0664	9.63911	8.75328	6.5273	9.66892	7.8085	7.22826	10.4451	9.28742
ENSGALG00000030040	CDH15	ENSGALT00000060683	GO:0070062(extracellular exosome);GO:0031594(neuromuscular junction);GO:0005901(caveola)	04514(Cell adhesion molecules (CAMs))	K06809	NA	cadherin 15 [Source:HGNC Symbol;Acc:HGNC:1754]	102.068	130.122	107.402	94.872	107.318	56.0686	79.6679	55.5196	25.3405	25.9771	30.5987	17.7371	18.951	18.1754	10.0437	20.8186	21.0106
ENSGALG00000007703		ENSGALT00000012483	GO:0046872(metal ion binding)	NA	NA	NA		12.5605	10.978	14.6363	7.34665	9.12518	7.27111	8.03023	6.40057	1.20602	0.66061	1.19168	1.12522	1.59335	1.90673	0.960343	1.37186	1.853
ENSGALG00000034171	EPB41L1	ENSGALT00000067757;ENSGALT00000064427;ENSGALT00000080236;ENSGALT00000049435;ENSGALT00000066463	GO:0045296(cadherin binding);GO:0045296(cadherin binding)	NA	NA	NA	erythrocyte membrane protein band 4.1 like 1 [Source:HGNC Symbol;Acc:HGNC:3378]	13.0648	17.2496	13.5331	8.71229	14.4353	7.5974	5.4667	8.95079	1.4174	2.10681	2.20663	2.61063	2.3461	1.7028	2.39386	2.85118	1.739
ENSGALG00000013200	GABBR2	ENSGALT00000021562;ENSGALT00000046850	GO:0007214(gamma-aminobutyric acid signaling pathway);GO:0005887(integral component of plasma membrane);GO:0005737(cytoplasm);GO:0046982(protein heterodimerization activity);GO:0043005(neuron projection);GO:0004965(G-protein coupled GABA receptor activity);GO:0038039(G-protein coupled receptor heterodimeric complex);GO:1902710(GABA receptor complex);GO:0005886(plasma membrane);GO:0007186(G-protei…	04080(Neuroactive ligand-receptor interaction);04080(Neuroactive ligand-receptor interaction)	K04615	NA	gamma-aminobutyric acid type B receptor subunit 2 [Source:HGNC Symbol;Acc:HGNC:4507]	15.0576	10.5123	13.2258	5.33483	6.45092	1.32328	0.33919	1.01314	0.303744	0.458751	0.190129	0.117908	0.127299	0.758097	0.206321	0.0825269	0.0965311
ENSGALG00000017326		ENSGALT00000027999	GO:0035023(regulation of Rho protein signal transduction);GO:0005089(Rho guanyl-nucleotide exchange factor activity);GO:0065009(regulation of molecular function)	NA	NA	NA		15.1764	15.1515	14.4995	11.9517	9.93955	6.44419	8.71099	9.09522	1.43836	1.34645	2.09111	1.66576	1.69659	2.85795	1.06154	1.78648	2.79492
ENSGALG00000027397	DUSP22	ENSGALT00000068315	GO:0000122(negative regulation of transcription from RNA polymerase II promoter);GO:0042127(regulation of cell proliferation);GO:0007179(transforming growth factor beta receptor signaling pathway);GO:0004725(protein tyrosine phosphatase activity);GO:0046330(positive regulation of JNK cascade);GO:0002710(negative regulation of T cell mediated immunity);GO:0050860(negative regulation of T cell rece…	NA	NA	NA	dual specificity phosphatase 22 [Source:HGNC Symbol;Acc:HGNC:16077]	79.9809	72.804	69.3502	92.245	100.059	76.524	64.077	51.2711	13.2531	8.99695	10.4515	8.0247	6.367	19.0067	11.1861	8.54511	9.29556
ENSGALG00000002287	CRB1	ENSGALT00000003596	GO:0005509(calcium ion binding);GO:0007009(plasma membrane organization);GO:0042462(eye photoreceptor cell development);GO:0061024(membrane organization);GO:0005886(plasma membrane);GO:0005902(microvillus);GO:0005913(cell-cell adherens junction);GO:0043234(protein complex)	NA	NA	NA	crumbs 1, cell polarity complex component [Source:HGNC Symbol;Acc:HGNC:2343]	12.2563	18.5186	15.3197	3.23338	4.3482	5.99751	3.29581	7.08591	4.39592	1.19785	0.979377	0.489661	0.389138	0.370254	0.239429	0.371147	0.329386
ENSGALG00000005294	PPFIBP2	ENSGALT00000077097;ENSGALT00000076589;ENSGALT00000058070;ENSGALT00000008490	GO:0005615(extracellular space);GO:0042802(identical protein binding);GO:0042802(identical protein binding)	NA	NA	NA	PPFIA binding protein 2 [Source:HGNC Symbol;Acc:HGNC:9250]	44.3844	60.7421	62.6017	126.133	94.0676	26.3124	25.5482	37.1872	23.0997	20.0568	9.93663	9.56197	9.03878	5.75865	9.4657	7.19421	3.8951
ENSGALG00000008054		ENSGALT00000013068;ENSGALT00000074750	GO:0006913(nucleocytoplasmic transport);GO:0042393(histone binding);GO:0042981(regulation of apoptotic process);GO:0005634(nucleus);GO:0005634(nucleus)	NA	NA	NA		109.447	106.043	89.3274	72.9404	62.0979	40.2415	46.1703	40.8138	14.5046	10.3107	8.85647	13.6242	11.342	22.4759	13.0235	11.8973	5.80546
ENSGALG00000042812	NRG3	ENSGALT00000068558;ENSGALT00000077075;ENSGALT00000064909	GO:0007389(pattern specification process);GO:0045499(chemorepellent activity);GO:0035556(intracellular signal transduction);GO:0030879(mammary gland development);GO:0060596(mammary placode formation);GO:2001223(negative regulation of neuron migration);GO:0021842(chemorepulsion involved in interneuron migration from the subpallium to the cortex);GO:0021842(chemorepulsion involved in interneuron mi…	NA	NA	NA	neuregulin 3 [Source:HGNC Symbol;Acc:HGNC:7999]	2.09506	2.26309	2.65322	9.47267	7.89714	4.25599	4.93455	12.4079	0.0394879	0.254243	0.1455	0	0.149933	0.0652006	0.03426	0	0
ENSGALG00000016990	LRCH1	ENSGALT00000027449;ENSGALT00000055673	GO:0007165(signal transduction);GO:0005886(plasma membrane);GO:0034260(negative regulation of GTPase activity);GO:1990869(cellular response to chemokine);GO:2000405(negative regulation of T cell migration);GO:0005737(cytoplasm);GO:0005737(cytoplasm)	NA	NA	NA	leucine rich repeats and calponin homology domain containing 1 [Source:HGNC Symbol;Acc:HGNC:20309]	28.0027	26.6984	23.4438	39.5261	40.1627	13.9828	11.9709	18.5805	8.62687	6.05541	5.02363	4.96655	5.7358	5.75509	4.76805	4.97168	2.76496
ENSGALG00000003427	USP3	ENSGALT00000079720;ENSGALT00000005420	GO:0016578(histone deubiquitination);GO:0006355(regulation of transcription, DNA-templated);GO:0036459(thiol-dependent ubiquitinyl hydrolase activity);GO:0005634(nucleus);GO:0016579(protein deubiquitination);GO:0006508(proteolysis);GO:0006511(ubiquitin-dependent protein catabolic process);GO:0016787(hydrolase activity);GO:0008234(cysteine-type peptidase activity);GO:0008233(peptidase activity);GO…	NA	NA	NA	ubiquitin specific peptidase 3 [Source:HGNC Symbol;Acc:HGNC:12626]	99.5158	102.241	95.1387	43.2707	42.5396	29.5317	30.0481	29.8367	15.5386	17.0026	11.598	15.8722	16.0087	25.4628	21.0533	18.0621	13.0482
ENSGALG00000011200	THBS2	ENSGALT00000018261	GO:0031091(platelet alpha granule);GO:0005615(extracellular space);GO:0005604(basement membrane);GO:0005578(proteinaceous extracellular matrix);GO:0016525(negative regulation of angiogenesis);GO:0008201(heparin binding);GO:0005509(calcium ion binding);GO:0031012(extracellular matrix);GO:0030198(extracellular matrix organization);GO:0007155(cell adhesion);GO:0005576(extracellular region)	04512(ECM-receptor interaction);04145(Phagosome);04510(Focal adhesion)	K04659	NA	thrombospondin-2 precursor [Source:RefSeq peptide;Acc:NP_001001755]	96.6666	92.9231	70.9661	93.2258	106.233	25.4452	27.9764	40.1853	1.79842	2.95768	5.18715	12.9184	5.92328	5.00559	1.99532	8.05956	2.27664
ENSGALG00000027918		ENSGALT00000044766;ENSGALT00000048047	NA	00565(Ether lipid metabolism);00565(Ether lipid metabolism)	K16795	EC:3.1.1.47		53.0979	48.5908	49.9901	25.0417	25.9264	20.463	16.69	15.52	7.94709	7.55344	8.00604	8.42014	8.38942	14.9377	10.7494	10.5376	10.6293
ENSGALG00000027788	CPE	ENSGALT00000046144	GO:0004185(serine-type carboxypeptidase activity);GO:0097060(synaptic membrane);GO:0030070(insulin processing);GO:0004181(metallocarboxypeptidase activity);GO:0005794(Golgi apparatus);GO:0043025(neuronal cell body);GO:0030141(secretory granule);GO:0006508(proteolysis);GO:0005615(extracellular space);GO:0008270(zinc ion binding);GO:0004180(carboxypeptidase activity);GO:0042043(neurexin family prot…	NA	NA	NA	carboxypeptidase E [Source:HGNC Symbol;Acc:HGNC:2303]	30.3045	37.3078	37.479	28.2165	30.1381	13.4163	9.29958	15.4684	6.55239	4.81462	4.05002	6.42521	4.72662	2.29725	2.02431	3.52082	2.3105
ENSGALG00000009722	DYNC1I1	ENSGALT00000015824;ENSGALT00000068135;ENSGALT00000088230;ENSGALT00000064994;ENSGALT00000056996	GO:0045504(dynein heavy chain binding);GO:0055037(recycling endosome);GO:0036464(cytoplasmic ribonucleoprotein granule);GO:0005868(cytoplasmic dynein complex);GO:0031982(vesicle);GO:0005737(cytoplasm);GO:0005634(nucleus);GO:0000922(spindle pole);GO:0000776(kinetochore);GO:0047496(vesicle transport along microtubule);GO:0045503(dynein light chain binding);GO:0030507(spectrin binding);GO:0008574(AT…	04145(Phagosome);05132(Salmonella infection);05132(Salmonella infection)	K10415	NA	dynein cytoplasmic 1 intermediate chain 1 [Source:HGNC Symbol;Acc:HGNC:2963]	2.70549	1.85446	2.25531	2.97934	2.03916	1.91324	1.06789	0.766517	0.116291	0.223845	0.0769038	0.0215715	0.0472077	0.0204534	0.0637708	0.126653	0.0367794
ENSGALG00000031275	TUBB6	ENSGALT00000074135;ENSGALT00000084283;ENSGALT00000083108;ENSGALT00000064218	GO:0005874(microtubule);GO:0007017(microtubule-based process);GO:0005525(GTP binding);GO:0003924(GTPase activity);GO:0005856(cytoskeleton);GO:0005737(cytoplasm);GO:0000166(nucleotide binding);GO:0007010(cytoskeleton organization);GO:0005200(structural constituent of cytoskeleton);GO:0005634(nucleus);GO:0015630(microtubule cytoskeleton);GO:0070062(extracellular exosome);GO:0070062(extracellular ex…	04145(Phagosome);04540(Gap junction);04540(Gap junction)	K07375	NA	tubulin beta 6 class V [Source:HGNC Symbol;Acc:HGNC:20776]	123.706	200.725	158.146	37.0916	39.5036	19.9356	4.22092	18.1299	10.7326	5.32475	7.02049	7.51705	4.74696	12.3956	10.8296	8.05628	17.4096
ENSGALG00000009282	ELMSAN1	ENSGALT00000015102	GO:0005654(nucleoplasm);GO:0000118(histone deacetylase complex);GO:0005667(transcription factor complex);GO:0008134(transcription factor binding);GO:0044212(transcription regulatory region DNA binding);GO:0006357(regulation of transcription from RNA polymerase II promoter);GO:0003700(transcription factor activity, sequence-specific DNA binding);GO:0003676(nucleic acid binding);GO:0005634(nucleus)…	NA	NA	NA	ELM2 and Myb/SANT domain containing 1 [Source:HGNC Symbol;Acc:HGNC:19853]	35.8985	41.5294	42.9581	19.4417	18.5741	14.9377	14.2877	15.1267	11.3198	8.47424	8.01612	8.0304	8.80599	9.53887	4.95876	6.48002	3.59644
ENSGALG00000041121	SLIT2	ENSGALT00000051951;ENSGALT00000067693;ENSGALT00000061965;ENSGALT00000059940;ENSGALT00000072873;ENSGALT00000074541	GO:0008045(motor neuron axon guidance);GO:0048846(axon extension involved in axon guidance);GO:0031290(retinal ganglion cell axon guidance);GO:0042802(identical protein binding);GO:0008201(heparin binding);GO:0042803(protein homodimerization activity);GO:0043065(positive regulation of apoptotic process);GO:0030336(negative regulation of cell migration);GO:0007411(axon guidance);GO:0005615(extrace…	NA	NA	NA	slit guidance ligand 2 [Source:HGNC Symbol;Acc:HGNC:11086]	12.5013	7.86452	10.5539	4.45111	5.84537	3.07252	3.92026	3.31315	1.98355	2.84882	1.9457	1.26382	1.37558	1.25647	1.27751	1.75279	1.36928
ENSGALG00000015053	GLDC	ENSGALT00000038351	GO:0005886(plasma membrane);GO:0005739(mitochondrion);GO:0005634(nucleus);GO:0006546(glycine catabolic process);GO:0004375(glycine dehydrogenase (decarboxylating) activity);GO:0016829(lyase activity);GO:0006520(cellular amino acid metabolic process);GO:0006544(glycine metabolic process);GO:0055114(oxidation-reduction process);GO:0016491(oxidoreductase activity);GO:0003824(catalytic activity);GO:1…	01200(Carbon metabolism);00630(Glyoxylate and dicarboxylate metabolism);00260(Glycine, serine and threonine metabolism)	K00281	EC:1.4.4.2	glycine decarboxylase [Source:HGNC Symbol;Acc:HGNC:4313]	9.03121	6.83787	8.4099	1.6524	1.34217	2.3265	1.03417	1.93766	0.23603	0.099781	0.19195	0.160493	0.114899	0.091965	0.170398	0.0116	0.013482
ENSGALG00000041436		ENSGALT00000055343	NA	NA	NA	NA		90.6653	98.7309	94.7037	57.4865	51.3777	34.394	41.8273	37.9239	20.3658	19.9384	19.0374	14.238	15.8785	22.8878	23.078	20.4529	24.9374
ENSGALG00000034166	ZCCHC14	ENSGALT00000054303	NA	NA	NA	NA	zinc finger CCHC-type containing 14 [Source:HGNC Symbol;Acc:HGNC:24134]	42.9025	41.6177	50.0895	56.6493	53.6615	18.915	26.3272	28.2701	10.9928	9.094	10.9318	11.4181	14.9796	11.8678	10.6823	12.4356	9.96905
ENSGALG00000032419	STARD8	ENSGALT00000076851;ENSGALT00000081467	NA	NA	NA	NA	StAR related lipid transfer domain containing 8 [Source:HGNC Symbol;Acc:HGNC:19161]	45.1614	48.0916	42.4896	76.0911	77.8112	42.006	59.2967	55.3777	11.6534	9.11362	12.2943	8.49883	9.36809	19.8539	6.85944	8.45687	10.8127
ENSGALG00000033593	UBE2E2	ENSGALT00000073854	GO:0070936(protein K48-linked ubiquitination);GO:0070534(protein K63-linked ubiquitination);GO:0004842(ubiquitin-protein transferase activity);GO:0061631(ubiquitin conjugating enzyme activity);GO:0070979(protein K11-linked ubiquitination);GO:0006974(cellular response to DNA damage stimulus);GO:1900087(positive regulation of G1/S transition of mitotic cell cycle);GO:0042296(ISG15 transferase activ…	04120(Ubiquitin mediated proteolysis)	K20217	EC:2.3.2.23	ubiquitin conjugating enzyme E2 E2 [Source:HGNC Symbol;Acc:HGNC:12478]	21.3646	18.7142	19.8727	22.8522	28.4372	6.51164	11.1657	13.3075	1.69459	1.4912	1.57851	2.17154	3.10934	3.1877	2.79679	2.39992	2.30954
ENSGALG00000007887	AAGAB	ENSGALT00000012808;ENSGALT00000057186	GO:0016607(nuclear speck);GO:0005829(cytosol);GO:0005737(cytoplasm);GO:0005737(cytoplasm)	NA	NA	NA	alpha and gamma adaptin binding protein [Source:HGNC Symbol;Acc:HGNC:25662]	42.6875	31.4856	31.0447	20.5283	19.7892	9.08638	7.73032	10.758	6.01442	5.79805	5.58852	5.71999	7.40763	7.57762	7.65911	6.77427	7.65847
ENSGALG00000003033	STXBP4	ENSGALT00000004800	GO:0019905(syntaxin binding);GO:0006605(protein targeting);GO:0006974(cellular response to DNA damage stimulus);GO:0008286(insulin receptor signaling pathway);GO:0010838(positive regulation of keratinocyte proliferation);GO:0015758(glucose transport);GO:0050821(protein stabilization);GO:0061178(regulation of insulin secretion involved in cellular response to glucose stimulus);GO:1902808(positive …	NA	NA	NA	syntaxin binding protein 4 [Source:HGNC Symbol;Acc:HGNC:19694]	20.0148	17.4319	21.4273	9.84281	10.6527	3.08952	2.62712	2.87393	2.82511	1.56354	2.36786	1.41688	1.24181	2.20984	2.67359	2.34421	2.08928
ENSGALG00000008591	CACNB2	ENSGALT00000013988;ENSGALT00000052701	GO:1990454(L-type voltage-gated calcium channel complex);GO:0005891(voltage-gated calcium channel complex);GO:1901385(regulation of voltage-gated calcium channel activity);GO:0098912(membrane depolarization during atrial cardiac muscle cell action potential);GO:0086091(regulation of heart rate by cardiac conduction);GO:0086045(membrane depolarization during AV node cell action potential);GO:00705…	04010(MAPK signaling pathway);04260(Cardiac muscle contraction);04261(Adrenergic signaling in cardiomyocytes);04261(Adrenergic signaling in cardiomyocytes)	K04863	NA	calcium voltage-gated channel auxiliary subunit beta 2 [Source:HGNC Symbol;Acc:HGNC:1402]	8.20608	8.66273	11.5933	9.527	9.54802	2.92899	2.2954	2.09624	0.39757	0.938664	0.541917	0.604601	0.935772	0.535669	0.378081	0.903327	0.277196
ENSGALG00000009850	NOVA1	ENSGALT00000045281;ENSGALT00000085678;ENSGALT00000083287;ENSGALT00000050799;ENSGALT00000016012;ENSGALT00000045208	GO:0000398(mRNA splicing, via spliceosome);GO:0003723(RNA binding);GO:0003676(nucleic acid binding);GO:0003729(mRNA binding);GO:0051252(regulation of RNA metabolic process);GO:0005634(nucleus);GO:0005730(nucleolus);GO:0043231(intracellular membrane-bounded organelle);GO:0043231(intracellular membrane-bounded organelle)	NA	NA	NA	NOVA alternative splicing regulator 1 [Source:HGNC Symbol;Acc:HGNC:7886]	14.6259	14.3228	16.6972	10.4991	11.2603	11.8378	10.4127	13.0788	3.93444	3.35726	2.37176	3.55938	2.44965	1.7958	1.04965	2.1704	1.3957
ENSGALG00000032930	NCL	ENSGALT00000058391	NA	NA	NA	NA	nucleolin [Source:HGNC Symbol;Acc:HGNC:7667]	155.015	146.616	177.308	69.3618	75.5034	89.7387	88.4884	88.2373	37.9971	25.1485	18.2051	30.1509	17.7511	30.4257	23.956	26.1131	24.9795
ENSGALG00000016509	IFT172	ENSGALT00000026634;ENSGALT00000085635;ENSGALT00000078709	GO:1903561(extracellular vesicle);GO:0097598(sperm cytoplasmic droplet);GO:0097228(sperm principal piece);GO:0097225(sperm midpiece);GO:0030992(intraciliary transport particle B);GO:0005930(axoneme);GO:0005929(cilium);GO:1905515(non-motile cilium assembly);GO:0070986(left/right axis specification);GO:0061525(hindgut development);GO:0060348(bone development);GO:0060271(cilium assembly);GO:0060173(…	NA	NA	NA	intraflagellar transport 172 [Source:HGNC Symbol;Acc:HGNC:30391]	8.06538	8.57488	8.32901	8.2747	8.18569	5.47221	6.55568	6.37774	2.91053	2.13367	1.83616	2.07905	2.10076	1.95986	1.23821	1.25323	1.30822
ENSGALG00000011770	UMPS	ENSGALT00000019216;ENSGALT00000085906	GO:0005737(cytoplasm);GO:0005634(nucleus);GO:0044205('de novo' UMP biosynthetic process);GO:0006222(UMP biosynthetic process);GO:0004590(orotidine-5'-phosphate decarboxylase activity);GO:0004588(orotate phosphoribosyltransferase activity);GO:0006221(pyrimidine nucleotide biosynthetic process);GO:0009116(nucleoside metabolic process);GO:0006207('de novo' pyrimidine nucleobase biosynthetic process)…	00240(Pyrimidine metabolism);00983(Drug metabolism - other enzymes);00983(Drug metabolism - other enzymes)	K13421	EC:2.4.2.10;EC:4.1.1.23	uridine monophosphate synthetase [Source:HGNC Symbol;Acc:HGNC:12563]	36.5472	28.9218	42.8661	17.6247	18.2043	9.77406	7.62334	8.28452	4.57211	5.60607	5.47719	3.88344	3.59708	7.92767	4.12335	4.58601	4.84464
ENSGALG00000043223	COL26A1	ENSGALT00000081518;ENSGALT00000067474;ENSGALT00000071614;ENSGALT00000066568;ENSGALT00000048686	GO:0031012(extracellular matrix);GO:0005783(endoplasmic reticulum);GO:0005794(Golgi apparatus);GO:0005578(proteinaceous extracellular matrix);GO:0010811(positive regulation of cell-substrate adhesion);GO:0010811(positive regulation of cell-substrate adhesion)	NA	NA	NA	collagen type XXVI alpha 1 chain [Source:HGNC Symbol;Acc:HGNC:18038]	47.8733	25.1353	34.2823	6.0667	12.597	0.391098	1.06371	1.25865	0.733217	0.72811	1.31308	1.42676	2.2949	2.37691	0	0.268522	0.325117
ENSGALG00000016991	ESD	ENSGALT00000065511;ENSGALT00000027451;ENSGALT00000084292;ENSGALT00000084428;ENSGALT00000086405;ENSGALT00000085171;ENSGALT00000066749;ENSGALT00000083811;ENSGALT00000078979	GO:0070062(extracellular exosome);GO:0046294(formaldehyde catabolic process);GO:0052689(carboxylic ester hydrolase activity);GO:0042802(identical protein binding);GO:0018738(S-formylglutathione hydrolase activity);GO:0016788(hydrolase activity, acting on ester bonds);GO:0016787(hydrolase activity);GO:0005737(cytoplasm);GO:0005737(cytoplasm)	01200(Carbon metabolism);01200(Carbon metabolism)	K01070	EC:3.1.2.12	esterase D [Source:HGNC Symbol;Acc:HGNC:3465]	86.597	80.5295	97.2774	110.067	144.947	66.8559	52.25	69.1825	30.9744	28.1158	31.9294	24.7776	25.512	29.4806	20.6498	26.4813	20.5453
ENSGALG00000016377	PXDN	ENSGALT00000026413;ENSGALT00000054497;ENSGALT00000053897	GO:0070062(extracellular exosome);GO:0031012(extracellular matrix);GO:0005783(endoplasmic reticulum);GO:0005615(extracellular space);GO:0055114(oxidation-reduction process);GO:0042744(hydrogen peroxide catabolic process);GO:0030198(extracellular matrix organization);GO:0020037(heme binding);GO:0005201(extracellular matrix structural constituent);GO:0004601(peroxidase activity);GO:0006979(response…	NA	NA	NA	peroxidasin [Source:HGNC Symbol;Acc:HGNC:14966]	93.8302	93.6525	95.007	81.4336	87.5445	28.5489	24.7032	27.991	20.1699	14.6019	22.5887	13.4677	15.3691	17.6754	12.2705	22.0648	26.4165
ENSGALG00000001062	GGT7	ENSGALT00000001589	GO:0036374(glutathione hydrolase activity);GO:0006751(glutathione catabolic process);GO:0006508(proteolysis);GO:0016021(integral component of membrane);GO:0016020(membrane);GO:1902883(negative regulation of response to oxidative stress)	00430(Taurine and hypotaurine metabolism);00480(Glutathione metabolism)	K00681	EC:2.3.2.2;EC:3.4.19.13	gamma-glutamyltransferase 7 [Source:HGNC Symbol;Acc:HGNC:4259]	8.03087	9.17817	8.055	8.61633	8.43064	2.6824	2.11289	4.06695	0.915042	1.0891	0.982978	0.888306	0.587054	0.480203	0.32805	0.811116	0.56961
ENSGALG00000026790	DMRT2	ENSGALT00000043613	GO:0043565(sequence-specific DNA binding);GO:0003700(transcription factor activity, sequence-specific DNA binding);GO:0006355(regulation of transcription, DNA-templated);GO:0046872(metal ion binding);GO:0005634(nucleus);GO:0003677(DNA binding);GO:0000977(RNA polymerase II regulatory region sequence-specific DNA binding);GO:0042803(protein homodimerization activity);GO:0014807(regulation of somito…	NA	NA	NA	doublesex and mab-3 related transcription factor 2 [Source:HGNC Symbol;Acc:HGNC:2935]	12.3349	11.3498	11.2887	7.22354	7.9975	7.74683	5.17621	6.3563	1.529	1.38563	1.42731	0.786591	1.19202	0.369299	0.968067	0.801637	0.573034
ENSGALG00000023089	SSBP2	ENSGALT00000037654;ENSGALT00000062112;ENSGALT00000088596	GO:0003697(single-stranded DNA binding);GO:0001077(transcriptional activator activity, RNA polymerase II core promoter proximal region sequence-specific binding);GO:0000978(RNA polymerase II core promoter proximal region sequence-specific DNA binding);GO:0045944(positive regulation of transcription from RNA polymerase II promoter);GO:0005634(nucleus);GO:0006366(transcription from RNA polymerase I…	NA	NA	NA	single stranded DNA binding protein 2 [Source:HGNC Symbol;Acc:HGNC:15831]	45.5972	42.2618	42.0674	42.3963	40.9309	20.7491	25.2575	27.9738	9.26121	10.1463	11.8287	9.82756	7.8922	6.86666	7.47259	8.59993	4.50644
ENSGALG00000040537		ENSGALT00000064940	NA	NA	NA	NA		13.1343	15.1234	12.8787	14.9428	14.3571	4.12181	7.26885	6.87506	2.93585	1.86859	3.62831	1.64567	3.03292	2.48332	0.576698	1.11618	0.656653
ENSGALG00000010195	PLK4	ENSGALT00000016572;ENSGALT00000051364	GO:0098536(deuterosome);GO:0005829(cytosol);GO:0005813(centrosome);GO:0005814(centriole);GO:0005730(nucleolus);GO:0098535(de novo centriole assembly involved in multi-ciliated epithelial cell differentiation);GO:0046601(positive regulation of centriole replication);GO:0007099(centriole replication);GO:0042802(identical protein binding);GO:0004674(protein serine/threonine kinase activity);GO:00064…	04068(FoxO signaling pathway);04068(FoxO signaling pathway)	K08863	EC:2.7.11.21	polo like kinase 4 [Source:HGNC Symbol;Acc:HGNC:11397]	35.5459	36.9463	35.6522	7.88907	12.1431	7.06301	4.88953	5.87643	1.96559	0.697342	0.704076	0.430725	0.372687	2.55943	0.284986	0.553955	0.192961
ENSGALG00000009378	PDGFC	ENSGALT00000015275	GO:0051781(positive regulation of cell division);GO:0009790(embryo development);GO:0005161(platelet-derived growth factor receptor binding);GO:0048008(platelet-derived growth factor receptor signaling pathway);GO:0043406(positive regulation of MAP kinase activity);GO:0031954(positive regulation of protein autophosphorylation);GO:0014068(positive regulation of phosphatidylinositol 3-kinase signali…	04060(Cytokine-cytokine receptor interaction);04510(Focal adhesion);04540(Gap junction);04810(Regulation of actin cytoskeleton)	K05450	NA	platelet derived growth factor C [Source:HGNC Symbol;Acc:HGNC:8801]	33.1143	20.9393	26.4596	17.4411	16.1867	10.4114	12.1544	9.6538	3.98306	3.59752	2.53839	3.62894	4.52528	2.89732	1.83045	3.79743	2.50823
ENSGALG00000011474		ENSGALT00000018707	NA	NA	NA	NA		20.36	18.7223	18.5226	9.94594	9.42308	7.43589	4.38109	6.85442	2.97397	3.05357	1.80532	0.787274	1.76834	1.43287	2.23174	1.93198	1.90764
ENSGALG00000009668	HPF1	ENSGALT00000015738;ENSGALT00000083652;ENSGALT00000089209	GO:0005634(nucleus);GO:0010835(regulation of protein ADP-ribosylation);GO:0006974(cellular response to DNA damage stimulus);GO:0042393(histone binding);GO:0018312(peptidyl-serine ADP-ribosylation);GO:0018312(peptidyl-serine ADP-ribosylation)	NA	NA	NA	histone PARylation factor 1 [Source:HGNC Symbol;Acc:HGNC:26051]	24.6915	30.5745	29.1071	12.3766	15.253	8.29441	7.17612	7.58256	4.36725	3.52188	4.31584	4.42385	3.96389	5.67089	3.68074	4.76704	3.76104
ENSGALG00000031119		ENSGALT00000081221	NA	NA	NA	NA		9.78119	11.2431	10.9801	3.14942	3.42766	1.28347	1.96579	1.72562	1.06022	0.365493	0.935956	0.287512	0.556725	0.839822	0.595853	0.605581	0.784683
ENSGALG00000038385	MTFR1	ENSGALT00000086297;ENSGALT00000048631	GO:0007005(mitochondrion organization);GO:0009060(aerobic respiration);GO:0005739(mitochondrion);GO:0000266(mitochondrial fission);GO:0005829(cytosol);GO:0005886(plasma membrane);GO:0005886(plasma membrane)	NA	NA	NA	Mitochondrial fission regulator 1 [Source:UniProtKB/Swiss-Prot;Acc:Q9PTD5]	45.8826	46.3107	48.5318	23.078	22.3423	33.9098	20.2077	23.1451	8.59318	10.3596	7.01998	6.7398	6.45947	10.0568	8.80899	7.18376	6.99246
ENSGALG00000039118	Meis2a.1	ENSGALT00000060228;ENSGALT00000052136	GO:0005634(nucleus);GO:0045944(positive regulation of transcription from RNA polymerase II promoter);GO:0045638(negative regulation of myeloid cell differentiation);GO:0008542(visual learning);GO:0001654(eye development);GO:0043565(sequence-specific DNA binding);GO:0008134(transcription factor binding);GO:0003712(transcription cofactor activity);GO:0003677(DNA binding);GO:0001077(transcriptional …	NA	NA	NA	Meis homeobox 2 [Source:HGNC Symbol;Acc:HGNC:7001]	15.7081	12.3014	15.3201	3.95995	4.29755	3.73616	6.28431	3.8348	0.909292	0.580829	1.01388	2.17092	0.728425	0.776492	0.810185	0.492291	0.354334
ENSGALG00000008896	PPP1R1C	ENSGALT00000014468;ENSGALT00000086764	GO:0043086(negative regulation of catalytic activity);GO:0004864(protein phosphatase inhibitor activity);GO:0007165(signal transduction);GO:0007165(signal transduction)	NA	NA	NA	protein phosphatase 1 regulatory inhibitor subunit 1C [Source:HGNC Symbol;Acc:HGNC:14940]	7.46596	20.5541	12.6732	11.7322	8.88172	1.76522	4.29598	5.56787	0.904443	0.4264	0.183642	0.289228	0.234347	0.376757	0.139724	0.270245	0.167273
ENSGALG00000032031	MMP16	ENSGALT00000061689;ENSGALT00000059837	GO:0001958(endochondral ossification);GO:0060348(bone development);GO:0004222(metalloendopeptidase activity);GO:0008270(zinc ion binding);GO:0070006(metalloaminopeptidase activity);GO:0001503(ossification);GO:0006508(proteolysis);GO:0016485(protein processing);GO:0030574(collagen catabolic process);GO:0035988(chondrocyte proliferation);GO:0048701(embryonic cranial skeleton morphogenesis);GO:00970…	NA	NA	NA	matrix metallopeptidase 16 [Source:HGNC Symbol;Acc:HGNC:7162]	21.9713	20.2343	22.2256	17.0856	21.0956	9.78876	7.82052	8.84371	5.64077	4.45047	3.92879	4.79191	3.53352	2.66042	2.70771	4.72818	2.91684
ENSGALG00000041640	TWIST1	ENSGALT00000085758;ENSGALT00000061950	GO:1902725(negative regulation of satellite cell differentiation);GO:0030335(positive regulation of cell migration);GO:0008284(positive regulation of cell proliferation);GO:0042803(protein homodimerization activity);GO:0010629(negative regulation of gene expression);GO:0010628(positive regulation of gene expression);GO:0005634(nucleus);GO:0046983(protein dimerization activity);GO:0060973(cell mig…	NA	NA	NA	twist family bHLH transcription factor 1 [Source:HGNC Symbol;Acc:HGNC:12428]	12.3434	10.5172	9.051	5.17849	4.54874	3.38074	3.63642	3.54416	0.490749	0.580755	0.658327	0.737712	0.278644	0.740189	0.329722	0.166351	0.590046
ENSGALG00000007177	PTPRG	ENSGALT00000069987;ENSGALT00000011619	GO:0070062(extracellular exosome);GO:0010633(negative regulation of epithelial cell migration);GO:0042802(identical protein binding);GO:0004725(protein tyrosine phosphatase activity);GO:0004721(phosphoprotein phosphatase activity);GO:0016787(hydrolase activity);GO:0016311(dephosphorylation);GO:0035335(peptidyl-tyrosine dephosphorylation);GO:0006470(protein dephosphorylation);GO:0016791(phosphatas…	NA	NA	NA	receptor-type tyrosine-protein phosphatase gamma precursor [Source:RefSeq peptide;Acc:NP_989645]	53.7522	50.6544	56.2069	44.0665	45.6826	38.292	39.5511	36.0036	12.9854	10.2095	14.8852	11.0981	11.6732	10.887	9.56599	16.238	13.001
ENSGALG00000010961	IGF2BP3	ENSGALT00000017840;ENSGALT00000050715;ENSGALT00000045214	GO:0003730(mRNA 3'-UTR binding);GO:0051028(mRNA transport);GO:0003723(RNA binding);GO:0006810(transport);GO:0006417(regulation of translation);GO:0005737(cytoplasm);GO:0003676(nucleic acid binding);GO:0005634(nucleus);GO:0005829(cytosol);GO:0048027(mRNA 5'-UTR binding);GO:0048027(mRNA 5'-UTR binding)	NA	NA	NA	insulin like growth factor 2 mRNA binding protein 3 [Source:HGNC Symbol;Acc:HGNC:28868]	56.8795	61.0539	55.2004	33.5355	38.8388	81.0839	33.4145	42.3034	13.2945	19.0455	9.48716	4.85041	3.04082	4.59261	5.26043	2.22321	1.48999
ENSGALG00000006719	GNAZ	ENSGALT00000010871	GO:0070062(extracellular exosome);GO:0044297(cell body);GO:0030425(dendrite);GO:0007188(adenylate cyclase-modulating G-protein coupled receptor signaling pathway);GO:0005834(heterotrimeric G-protein complex);GO:0031683(G-protein beta/gamma-subunit complex binding);GO:0019001(guanyl nucleotide binding);GO:0004871(signal transducer activity);GO:0005525(GTP binding);GO:0003924(GTPase activity);GO:00…	NA	NA	NA	G protein subunit alpha z [Source:HGNC Symbol;Acc:HGNC:4395]	6.13697	6.67387	6.94837	4.68798	3.94411	3.73695	3.23126	4.34009	0.587544	0.524332	0.513165	0.181216	0.191134	0.235229	0.088693	0.412224	0.050143
ENSGALG00000011271	LUM	ENSGALT00000018392;ENSGALT00000086829	GO:0070062(extracellular exosome);GO:0031012(extracellular matrix);GO:0005615(extracellular space);GO:0005583(fibrillar collagen trimer);GO:0005578(proteinaceous extracellular matrix);GO:0045944(positive regulation of transcription from RNA polymerase II promoter);GO:0032914(positive regulation of transforming growth factor beta1 production);GO:0030199(collagen fibril organization);GO:0005518(col…	NA	NA	NA	lumican [Source:HGNC Symbol;Acc:HGNC:6724]	217.845	186.226	188.976	145.751	143.739	40.7732	90.318	59.2522	31.5691	20.0529	17.9566	39.5021	21.224	14.7263	16.6475	22.9185	15.9472
ENSGALG00000005927		ENSGALT00000009535	NA	NA	NA	NA		23.5917	21.2286	28.295	9.38788	10.3381	8.38617	6.5655	5.92313	2.86459	3.30878	1.69959	3.15372	2.78614	3.32279	1.48857	2.02919	1.58181
ENSGALG00000031835		ENSGALT00000070165	NA	NA	NA	NA		17.6073	13.2961	15.9338	9.00047	8.13942	5.21619	2.71937	3.98632	1.88402	0.629847	1.00955	1.67353	0.960883	1.71863	1.45259	1.22274	0.753933
ENSGALG00000040521	HOXA2	ENSGALT00000083647;ENSGALT00000052233	GO:0043231(intracellular membrane-bounded organelle);GO:0005634(nucleus);GO:0043565(sequence-specific DNA binding);GO:0003700(transcription factor activity, sequence-specific DNA binding);GO:0007275(multicellular organism development);GO:0006355(regulation of transcription, DNA-templated);GO:0006351(transcription, DNA-templated);GO:0003677(DNA binding);GO:0003677(DNA binding)	NA	NA	NA	Homeobox protein Hox-A2 [Source:UniProtKB/Swiss-Prot;Acc:Q08727]	9.49065	8.20582	11.1956	4.74941	3.48282	1.68101	6.18549	5.25938	0.178108	0.414048	0.565358	0.345708	0.19919	0.286745	0.229027	0.240395	0.124682
ENSGALG00000014991	HDAC2	ENSGALT00000063622;ENSGALT00000053730;ENSGALT00000053209;ENSGALT00000084630;ENSGALT00000087936;ENSGALT00000024179	GO:0070932(histone H3 deacetylation);GO:0016575(histone deacetylation);GO:0032041(NAD-dependent histone deacetylase activity (H3-K14 specific));GO:0004407(histone deacetylase activity);GO:0016569(covalent chromatin modification);GO:0016787(hydrolase activity);GO:0006355(regulation of transcription, DNA-templated);GO:0006351(transcription, DNA-templated);GO:0046872(metal ion binding);GO:0005634(nu…	04330(Notch signaling pathway);04110(Cell cycle);04110(Cell cycle)	K06067	EC:3.5.1.98	histone deacetylase 2 [Source:HGNC Symbol;Acc:HGNC:4853]	76.5527	73.7261	78.0519	37.1533	36.8004	44.2276	42.946	43.9312	26.1213	18.7218	16.1854	16.2106	13.8995	13.7298	15.3524	13.5176	9.68859
ENSGALG00000028543	FGFR4	ENSGALT00000025332	GO:0030133(transport vesicle);GO:0005911(cell-cell junction);GO:0005887(integral component of plasma membrane);GO:0005794(Golgi apparatus);GO:0005886(plasma membrane);GO:0005783(endoplasmic reticulum);GO:2000573(positive regulation of DNA biosynthetic process);GO:0070857(regulation of bile acid biosynthetic process);GO:0070374(positive regulation of ERK1 and ERK2 cascade);GO:0046777(protein autop…	04010(MAPK signaling pathway);04144(Endocytosis);04810(Regulation of actin cytoskeleton)	K05095	EC:2.7.10.1	fibroblast growth factor receptor 4 [Source:HGNC Symbol;Acc:HGNC:3691]	63.6288	54.0709	59.154	23.6382	23.9368	34.8834	33.718	48.6267	13.7151	7.4343	12.4656	4.57828	7.10107	5.858	5.74542	13.1324	9.13948
ENSGALG00000014935	GREB1L	ENSGALT00000024089;ENSGALT00000063542;ENSGALT00000080671	NA	NA	NA	NA	growth regulation by estrogen in breast cancer 1 like [Source:HGNC Symbol;Acc:HGNC:31042]	20.1941	17.4221	17.3273	11.5525	9.53844	8.69056	7.78729	6.29103	2.43836	2.83255	1.99944	1.48581	1.82636	2.80509	4.1114	3.77172	1.99303
ENSGALG00000029198	YDJC	ENSGALT00000062571;ENSGALT00000048769	NA	NA	NA	NA	YdjC chitooligosaccharide deacetylase homolog [Source:HGNC Symbol;Acc:HGNC:27158]	36.1236	15.59	30.3848	5.46337	5.24977	4.40656	3.43136	2.14348	2.17702	1.64857	1.80557	2.18722	1.8926	4.32308	1.21053	1.05197	0.903011
ENSGALG00000011099	FAP	ENSGALT00000018083	GO:0071438(invadopodium membrane);GO:0045178(basal part of cell);GO:0045177(apical part of cell);GO:0030027(lamellipodium);GO:0009986(cell surface);GO:0005925(focal adhesion);GO:0005886(plasma membrane);GO:0005615(extracellular space);GO:1903054(negative regulation of extracellular matrix organization);GO:1902362(melanocyte apoptotic process);GO:1900119(positive regulation of execution phase of a…	NA	NA	NA	seprase [Source:RefSeq peptide;Acc:NP_001180568]	64.8282	52.3068	60.7476	28.5782	31.0173	12.4698	12.9745	12.2828	6.4127	5.09463	2.91203	9.38249	3.8149	3.15098	4.23796	3.48335	1.29102
ENSGALG00000045548		ENSGALT00000085923	NA	NA	NA	NA		49.9376	41.3615	44.8205	14.8041	16.2597	6.2331	6.57829	7.27561	2.14995	0.69367	0.670045	3.295	0.887041	0.648783	1.44833	0.489902	0.462273
ENSGALG00000011982	PDE5	ENSGALT00000019550;ENSGALT00000074538	GO:0004114(3',5'-cyclic-nucleotide phosphodiesterase activity);GO:0008081(phosphoric diester hydrolase activity);GO:0016787(hydrolase activity);GO:0046872(metal ion binding);GO:0007165(signal transduction);GO:0004112(cyclic-nucleotide phosphodiesterase activity);GO:0030553(cGMP binding);GO:0010613(positive regulation of cardiac muscle hypertrophy);GO:0030823(regulation of cGMP metabolic process);…	00230(Purine metabolism);00230(Purine metabolism)	K13762	EC:3.1.4.35	phosphodiesterase 5A [Source:HGNC Symbol;Acc:HGNC:8784]	57.5331	42.7013	53.5123	45.7363	39.9372	28.9222	20.6901	25.9358	15.2158	14.025	7.85938	8.847	11.0451	6.83492	6.54569	7.44656	5.22669
ENSGALG00000015284	RGMB	ENSGALT00000024669	GO:0046658(anchored component of plasma membrane);GO:0005793(endoplasmic reticulum-Golgi intermediate compartment);GO:0045893(positive regulation of transcription, DNA-templated);GO:0030509(BMP signaling pathway);GO:0007165(signal transduction);GO:0007155(cell adhesion);GO:0042802(identical protein binding);GO:0015026(coreceptor activity);GO:0005886(plasma membrane)	NA	NA	NA	repulsive guidance molecule family member b [Source:HGNC Symbol;Acc:HGNC:26896]	62.5072	63.387	59.5952	28.6091	31.3648	30.679	24.3691	25.4181	11.2746	12.2488	12.4841	8.44346	11.7163	9.76063	10.9317	15.0051	8.84785
ENSGALG00000022926	GPR162	ENSGALT00000023388	GO:0007186(G-protein coupled receptor signaling pathway);GO:0004930(G-protein coupled receptor activity);GO:0016021(integral component of membrane);GO:0016020(membrane)	NA	NA	NA	G protein-coupled receptor 162 [Source:HGNC Symbol;Acc:HGNC:16693]	15.9846	18.6381	15.2198	9.72295	10.0743	3.16587	5.60299	4.01121	1.99944	0.927456	1.01319	1.22558	1.29791	2.19098	1.0965	1.99718	1.56665
ENSGALG00000007130	cRac1A	ENSGALT00000011552	GO:0031532(actin cytoskeleton reorganization);GO:0007264(small GTPase mediated signal transduction);GO:0001755(neural crest cell migration);GO:0005525(GTP binding);GO:0003924(GTPase activity);GO:0005622(intracellular);GO:0000166(nucleotide binding);GO:0016020(membrane);GO:0019899(enzyme binding);GO:0031996(thioesterase binding);GO:0001934(positive regulation of protein phosphorylation);GO:0008361…	04010(MAPK signaling pathway);04310(Wnt signaling pathway);04370(VEGF signaling pathway);04145(Phagosome);04510(Focal adhesion);04520(Adherens junction);04530(Tight junction);04810(Regulation of actin cytoskeleton);04620(Toll-like receptor signaling pathway);04933(AGE-RAGE signaling pathway in diabetic complications);05132(Salmonella infection)	K04392	NA	ras-related C3 botulinum toxin substrate 1 (rho family, small GTP binding protein Rac1) [Source:HGNC Symbol;Acc:HGNC:9801]	210.297	237.242	225.26	109.311	108.122	100.411	90.2804	95.4791	49.1224	42.8043	34.3969	56.4572	44.6473	55.4553	57.605	55.3891	55.353
ENSGALG00000002631	LRRC75A	ENSGALT00000004146	NA	NA	NA	NA	leucine rich repeat containing 75A [Source:HGNC Symbol;Acc:HGNC:32403]	36.8884	32.5034	30.6411	20.7579	16.9091	6.91657	11.1029	8.16422	3.19013	2.12925	2.78523	4.8609	4.47679	6.43209	1.4651	3.38705	3.70327
ENSGALG00000003590	C17orf58	ENSGALT00000034629	NA	NA	NA	NA	chromosome 17 open reading frame 58 [Source:HGNC Symbol;Acc:HGNC:27568]	17.4006	31.8073	17.1127	25.1618	26.6964	12.0365	4.77532	17.228	3.70743	2.76166	2.15542	2.03844	1.72903	1.36676	0.520395	1.30323	0.403983
ENSGALG00000004334	MYLK3	ENSGALT00000006871;ENSGALT00000058562	GO:0015629(actin cytoskeleton);GO:0005737(cytoplasm);GO:0071347(cellular response to interleukin-1);GO:0048769(sarcomerogenesis);GO:0055003(cardiac myofibril assembly);GO:0045214(sarcomere organization);GO:0006468(protein phosphorylation);GO:0002528(regulation of vascular permeability involved in acute inflammatory response);GO:0004687(myosin light chain kinase activity);GO:0004683(calmodulin-dep…	04371(Apelin signaling pathway);04020(Calcium signaling pathway);04510(Focal adhesion);04810(Regulation of actin cytoskeleton);04270(Vascular smooth muscle contraction);04270(Vascular smooth muscle contraction)	K00907	EC:2.7.11.18	myosin light chain kinase 3 [Source:HGNC Symbol;Acc:HGNC:29826]	4.1504	4.82794	5.20096	8.78377	7.74286	2.35317	2.2197	2.71086	0.797891	0.697256	0.321074	0.528369	0.348758	0.968506	0.409685	0.541217	0.474386
ENSGALG00000003803	DAB2	ENSGALT00000006033	GO:0070062(extracellular exosome);GO:0070022(transforming growth factor beta receptor complex);GO:0043231(intracellular membrane-bounded organelle);GO:0030136(clathrin-coated vesicle);GO:0005925(focal adhesion);GO:0005905(clathrin-coated pit);GO:0005886(plasma membrane);GO:0005730(nucleolus);GO:0001650(fibrillar center);GO:2000643(positive regulation of early endosome to late endosome transport);…	04144(Endocytosis)	K12475	NA	DAB2, clathrin adaptor protein [Source:HGNC Symbol;Acc:HGNC:2662]	46.9403	41.2055	42.8858	39.8771	41.3034	18.5098	36.0808	39.7935	11.3079	6.81289	6.9046	8.33717	7.16667	8.00136	7.61688	7.67643	8.00818
ENSGALG00000002447	CTNNA1	ENSGALT00000003856;ENSGALT00000073093	GO:0090136(epithelial cell-cell adhesion);GO:0045296(cadherin binding);GO:0008013(beta-catenin binding);GO:0005912(adherens junction);GO:0007015(actin filament organization);GO:0051015(actin filament binding);GO:0005829(cytosol);GO:0007155(cell adhesion);GO:0045295(gamma-catenin binding);GO:0042802(identical protein binding);GO:0005925(focal adhesion);GO:0003723(RNA binding);GO:0005886(plasma mem…	04520(Adherens junction);04520(Adherens junction)	K05691	NA	catenin alpha 1 [Source:HGNC Symbol;Acc:HGNC:2509]	162.12	160.689	156.186	124.052	116.815	76.7055	70.1519	69.9161	33.1851	28.1533	29.6656	27.9406	22.9986	41.1684	26.4744	37.5506	40.7832
ENSGALG00000008298	LRRC17	ENSGALT00000013512	GO:0045671(negative regulation of osteoclast differentiation);GO:0048539(bone marrow development);GO:0005615(extracellular space)	NA	NA	NA	leucine rich repeat containing 17 [Source:HGNC Symbol;Acc:HGNC:16895]	82.6354	80.2683	88.5316	50.5093	48.9426	11.0862	9.11762	9.98992	4.40049	2.50166	1.18148	4.83422	3.65365	0.67403	0.430775	1.05949	0.096896
ENSGALG00000014970	FSTL1	ENSGALT00000024146	GO:0070062(extracellular exosome);GO:0005615(extracellular space);GO:1901390(positive regulation of transforming growth factor beta activation);GO:0042594(response to starvation);GO:0005509(calcium ion binding)	NA	NA	NA	follistatin like 1 [Source:HGNC Symbol;Acc:HGNC:3972]	468.896	434.928	427.976	400.341	387.413	223.228	228.538	231.363	77.5819	77.8496	101.509	68.8101	43.6368	85.4302	33.4392	66.6058	76.9984
ENSGALG00000004710	TMOD3	ENSGALT00000007504;ENSGALT00000056969	GO:0006936(muscle contraction);GO:0007015(actin filament organization);GO:0051694(pointed-end actin filament capping);GO:0005523(tropomyosin binding);GO:0030239(myofibril assembly);GO:0030036(actin cytoskeleton organization);GO:0048821(erythrocyte development);GO:0005865(striated muscle thin filament);GO:0098641(cadherin binding involved in cell-cell adhesion);GO:0005913(cell-cell adherens juncti…	NA	NA	NA	tropomodulin 3 [Source:HGNC Symbol;Acc:HGNC:11873]	56.3647	52.1178	65.7396	40.2357	44.57	24.8623	21.713	26.9406	10.7319	8.10557	6.49996	9.01183	7.83592	13.4113	14.6706	12.1857	9.25872
ENSGALG00000000613	RAB11B	ENSGALT00000000866	GO:0070062(extracellular exosome);GO:0055038(recycling endosome membrane);GO:0055037(recycling endosome);GO:0045335(phagocytic vesicle);GO:0005739(mitochondrion);GO:0005737(cytoplasm);GO:2001135(regulation of endocytic recycling);GO:2000008(regulation of protein localization to cell surface);GO:1990126(retrograde transport, endosome to plasma membrane);GO:0090150(establishment of protein localiza…	04144(Endocytosis)	K07905	NA	RAB11B, member RAS oncogene family [Source:HGNC Symbol;Acc:HGNC:9761]	118.568	108.911	118.591	60.7454	63.8401	52.4596	58.9204	50.7736	23.6963	19.7661	26.8089	23.1354	20.7114	29.6374	23.2305	24.0353	30.5773
ENSGALG00000033062	PDE6D	ENSGALT00000059427;ENSGALT00000085259	GO:0017137(Rab GTPase binding);GO:0031410(cytoplasmic vesicle);GO:0005829(cytosol);GO:0005095(GTPase inhibitor activity);GO:0005095(GTPase inhibitor activity)	00230(Purine metabolism);00230(Purine metabolism)	K13758	NA	phosphodiesterase 6D [Source:HGNC Symbol;Acc:HGNC:8788]	45.6132	37.7236	41.0677	16.1684	17.7702	17.6119	18.9246	16.6113	7.73507	6.2169	5.65807	7.08042	5.23659	7.83057	5.9868	6.57894	4.34507
ENSGALG00000014749	EPHB6	ENSGALT00000023783	GO:0048013(ephrin receptor signaling pathway);GO:0005003(ephrin receptor activity);GO:0018108(peptidyl-tyrosine phosphorylation);GO:0007169(transmembrane receptor protein tyrosine kinase signaling pathway);GO:0005887(integral component of plasma membrane);GO:0004713(protein tyrosine kinase activity);GO:0006468(protein phosphorylation);GO:0016740(transferase activity);GO:0005524(ATP binding);GO:00…	NA	NA	NA	EPH receptor B6 [Source:HGNC Symbol;Acc:HGNC:3396]	10.246	6.96747	9.03913	5.36126	5.1071	2.54762	2.38021	3.34116	1.1546	0.81131	0.781039	1.43265	1.01888	2.08091	0.848937	0.902366	0.767031
ENSGALG00000033834	TRIP13	ENSGALT00000084243;ENSGALT00000090074;ENSGALT00000061383	GO:0042802(identical protein binding);GO:0048477(oogenesis);GO:0007130(synaptonemal complex assembly);GO:0007283(spermatogenesis);GO:0006302(double-strand break repair);GO:0007286(spermatid development);GO:0001556(oocyte maturation);GO:0007131(reciprocal meiotic recombination);GO:0007141(male meiosis I);GO:0007144(female meiosis I);GO:0001673(male germ cell nucleus);GO:0007094(mitotic spindle ass…	NA	NA	NA	Pachytene checkpoint protein 2 homolog [Source:UniProtKB/Swiss-Prot;Acc:E1C6Q1]	15.1886	14.4833	15.4697	4.17103	3.40126	2.86193	0.957495	2.99828	0.970915	0.55505	0.438859	0.440145	0.469005	1.36829	0.431631	0.517514	0.323781
ENSGALG00000032313	KDELR3	ENSGALT00000085212;ENSGALT00000066300	GO:0005783(endoplasmic reticulum);GO:0005783(endoplasmic reticulum)	NA	NA	NA	KDEL endoplasmic reticulum protein retention receptor 3 [Source:HGNC Symbol;Acc:HGNC:6306]	33.2441	26.4537	40.9488	27.215	24.3131	13.2419	19.1288	15.1716	5.28262	4.16347	5.28126	6.08454	5.19356	7.55043	2.77543	5.16034	5.12192
ENSGALG00000010745	HMGB2	ENSGALT00000017483;ENSGALT00000060465	GO:0048471(perinuclear region of cytoplasm);GO:0043234(protein complex);GO:0005737(cytoplasm);GO:0005730(nucleolus);GO:0005634(nucleus);GO:0005623(cell);GO:0005615(extracellular space);GO:0000793(condensed chromosome);GO:0000790(nuclear chromatin);GO:1902042(negative regulation of extrinsic apoptotic signaling pathway via death domain receptors);GO:0072091(regulation of stem cell proliferation);G…	NA	NA	NA	high mobility group box 2 [Source:HGNC Symbol;Acc:HGNC:5000]	68.4287	61.5519	75.4331	25.7042	18.9307	22.1978	12.8785	22.9649	11.411	3.26987	3.31895	1.63968	1.59627	4.81856	2.06155	2.42472	1.67954
ENSGALG00000006068	TNRC6A	ENSGALT00000075098;ENSGALT00000065348;ENSGALT00000009788;ENSGALT00000049460;ENSGALT00000066667;ENSGALT00000079352;ENSGALT00000062280	GO:0043231(intracellular membrane-bounded organelle);GO:0035068(micro-ribonucleoprotein complex);GO:0005794(Golgi apparatus);GO:0005654(nucleoplasm);GO:0000932(P-body);GO:0035278(miRNA mediated inhibition of translation);GO:0035195(gene silencing by miRNA);GO:0003723(RNA binding);GO:0003676(nucleic acid binding);GO:0003676(nucleic acid binding)	NA	NA	NA	trinucleotide repeat containing 6A [Source:HGNC Symbol;Acc:HGNC:11969]	76.0725	73.8968	75.9646	68.2483	72.571	46.1593	41.9843	43.34	20.1625	13.8743	11.237	17.2018	19.7404	16.0786	15.4668	9.78371	7.2911
ENSGALG00000008414	DVL3	ENSGALT00000079098;ENSGALT00000079617;ENSGALT00000013704	GO:0005829(cytosol);GO:0000790(nuclear chromatin);GO:1903827(regulation of cellular protein localization);GO:0090179(planar cell polarity pathway involved in neural tube closure);GO:0060071(Wnt signaling pathway, planar cell polarity pathway);GO:0060070(canonical Wnt signaling pathway);GO:0050821(protein stabilization);GO:0045893(positive regulation of transcription, DNA-templated);GO:0043547(pos…	04310(Wnt signaling pathway);04330(Notch signaling pathway);04150(mTOR signaling pathway);04916(Melanogenesis);04916(Melanogenesis)	K02353	NA	dishevelled segment polarity protein 3 [Source:HGNC Symbol;Acc:HGNC:3087]	35.6675	37.5648	37.1982	13.441	14.6114	9.8625	15.0903	11.6266	4.15759	3.66533	3.99865	4.05817	2.84572	7.88855	4.57415	5.00918	6.51542
ENSGALG00000010133	PTCH2	ENSGALT00000060098;ENSGALT00000016479;ENSGALT00000063103	GO:0005119(smoothened binding);GO:0097108(hedgehog family protein binding);GO:0001709(cell fate determination);GO:0008544(epidermis development);GO:0009957(epidermal cell fate specification);GO:0042633(hair cycle);GO:0043588(skin development);GO:0045606(positive regulation of epidermal cell differentiation);GO:0008158(hedgehog receptor activity);GO:0007165(signal transduction);GO:0016021(integral…	NA	NA	NA	patched 2 [Source:HGNC Symbol;Acc:HGNC:9586]	2.91051	3.6937	3.99536	2.10453	1.86314	0.765524	1.60662	0.937662	0.11018	0.195169	0.270056	0.0931545	0.096374	0.226539	0.17704	0.150114	0.24331
ENSGALG00000042628	ARHGAP23	ENSGALT00000058392;ENSGALT00000081442	GO:0070062(extracellular exosome);GO:0070062(extracellular exosome)	NA	NA	NA	Rho GTPase activating protein 23 [Source:HGNC Symbol;Acc:HGNC:29293]	4.04715	4.06339	4.48212	3.80877	2.73148	1.3816	2.29176	1.78448	0.470681	0.478352	0.344247	0.676456	0.707119	0.60305	0.304635	0.438276	0.654382
ENSGALG00000009796	RPS6KC1	ENSGALT00000031937	GO:0007165(signal transduction);GO:0005737(cytoplasm);GO:0006468(protein phosphorylation);GO:0005524(ATP binding);GO:0004672(protein kinase activity);GO:0005769(early endosome)	NA	NA	NA	ribosomal protein S6 kinase C1 [Source:HGNC Symbol;Acc:HGNC:10439]	22.8056	21.4554	22.1547	15.9415	15.3661	10.7076	10.4874	10.2904	5.04987	5.56653	3.95251	3.49397	3.55804	3.70693	3.89756	2.53675	1.92878
ENSGALG00000005982	KLHL13	ENSGALT00000009621;ENSGALT00000061100	GO:0031463(Cul3-RING ubiquitin ligase complex);GO:0000910(cytokinesis);GO:0004842(ubiquitin-protein transferase activity);GO:0007049(cell cycle);GO:0030496(midbody);GO:0051301(cell division);GO:0016567(protein ubiquitination);GO:0016567(protein ubiquitination)	04120(Ubiquitin mediated proteolysis);04120(Ubiquitin mediated proteolysis)	K10447	NA	Kelch-like protein 13 [Source:UniProtKB/Swiss-Prot;Acc:Q5ZLD3]	34.7184	33.7285	39.9218	26.7929	23.828	12.0302	10.6719	13.8768	9.29793	7.08753	7.8583	6.38301	7.72115	10.9288	4.87292	6.7808	4.74873
ENSGALG00000007111	KCTD6	ENSGALT00000011518	GO:0042802(identical protein binding);GO:0030506(ankyrin binding);GO:0051260(protein homooligomerization);GO:0097602(cullin family protein binding);GO:0006511(ubiquitin-dependent protein catabolic process);GO:0045879(negative regulation of smoothened signaling pathway)	NA	NA	NA	potassium channel tetramerization domain containing 6 [Source:HGNC Symbol;Acc:HGNC:22235]	25.7691	30.9328	28.6558	15.8397	14.6445	8.26638	8.98934	6.7918	5.22532	5.81865	4.75331	5.05873	5.15604	5.74357	5.71294	5.4995	4.38771
ENSGALG00000012386	LATS1	ENSGALT00000020221;ENSGALT00000061540	GO:0000922(spindle pole);GO:2000058(regulation of protein ubiquitination involved in ubiquitin-dependent protein catabolic process);GO:0090090(negative regulation of canonical Wnt signaling pathway);GO:0051220(cytoplasmic sequestering of protein);GO:0046620(regulation of organ growth);GO:0045736(negative regulation of cyclin-dependent protein serine/threonine kinase activity);GO:0043254(regulatio…	NA	NA	NA	large tumor suppressor kinase 1 [Source:HGNC Symbol;Acc:HGNC:6514]	30.2526	34.7809	34.8765	23.2009	22.1138	15.0809	16.5772	17.0375	7.22791	5.88923	5.33554	6.09514	5.17189	8.69806	7.3003	7.64859	4.82128
ENSGALG00000013427	SORBS2	ENSGALT00000085041;ENSGALT00000021898	GO:0003723(RNA binding);GO:0007015(actin filament organization);GO:0007015(actin filament organization)	NA	NA	NA	sorbin and SH3 domain containing 2 [Source:HGNC Symbol;Acc:HGNC:24098]	23.2529	29.1383	21.7188	12.6601	11.296	14.3197	18.4402	15.3698	3.87904	5.1556	3.03883	2.77542	2.73303	1.98779	7.61153	4.61677	4.02986
ENSGALG00000017199	MAML2	ENSGALT00000027799	GO:0016607(nuclear speck);GO:0005634(nucleus);GO:0045944(positive regulation of transcription from RNA polymerase II promoter);GO:0007219(Notch signaling pathway);GO:0003713(transcription coactivator activity);GO:0007221(positive regulation of transcription of Notch receptor target)	04330(Notch signaling pathway)	K06061	NA	mastermind like transcriptional coactivator 2 [Source:HGNC Symbol;Acc:HGNC:16259]	21.0756	19.1073	18.2919	17.6042	16.4654	7.63355	10.8139	9.29781	2.61804	2.23112	2.44532	2.13004	2.18587	5.1566	2.73946	3.10357	3.80126
ENSGALG00000035187	FHL3	ENSGALT00000062100;ENSGALT00000053867;ENSGALT00000084059	GO:0005634(nucleus);GO:0005925(focal adhesion);GO:0030018(Z disc);GO:0030036(actin cytoskeleton organization);GO:0001725(stress fiber);GO:0003779(actin binding);GO:0003779(actin binding)	NA	NA	NA	four and a half LIM domains 3 [Source:HGNC Symbol;Acc:HGNC:3704]	81.0591	80.1209	78.379	114.622	117.091	27.6503	29.911	43.3272	13.4912	19.9972	15.8516	17.0397	15.1324	23.7399	7.34736	10.1351	18.9252
ENSGALG00000029011	SLC35F1	ENSGALT00000043188;ENSGALT00000050109	GO:0022857(transmembrane transporter activity);GO:0055085(transmembrane transport);GO:0016021(integral component of membrane);GO:0016020(membrane);GO:0016020(membrane)	NA	NA	NA	solute carrier family 35 member F1 [Source:HGNC Symbol;Acc:HGNC:21483]	7.93041	7.17975	7.20926	7.62272	7.22986	2.70236	4.76346	2.67594	0.705087	0.381891	0.427948	0.608995	0.397316	0.749234	0.106774	0.386707	0.195114
ENSGALG00000030439		ENSGALT00000050323	NA	NA	NA	NA		34.4814	31.9926	39.2886	29.7058	29.2264	10.1432	14.1191	13.9436	3.40408	2.35042	1.00945	3.77816	1.79593	1.07531	1.62777	1.40373	0.48101
ENSGALG00000004250	B4GALNT4	ENSGALT00000006762	GO:0008376(acetylgalactosaminyltransferase activity);GO:0032580(Golgi cisterna membrane);GO:0005794(Golgi apparatus);GO:0016740(transferase activity);GO:0033842(N-acetyl-beta-glucosaminyl-glycoprotein 4-beta-N-acetylgalactosaminyltransferase activity)	NA	NA	NA	beta-1,4-N-acetyl-galactosaminyltransferase 4 [Source:HGNC Symbol;Acc:HGNC:26315]	27.9772	26.4198	28.9475	6.65313	7.4927	3.21866	4.04875	2.80398	1.01659	0.516559	0.501828	0.538486	0.492495	2.69584	0.550026	0.540661	1.64164
ENSGALG00000012702	JARID2	ENSGALT00000020740	GO:0035098(ESC/E(Z) complex);GO:0035097(histone methyltransferase complex);GO:0005634(nucleus);GO:0005739(mitochondrion);GO:0051574(positive regulation of histone H3-K9 methylation);GO:0048863(stem cell differentiation);GO:0048538(thymus development);GO:0048536(spleen development);GO:0045892(negative regulation of transcription, DNA-templated);GO:0042127(regulation of cell proliferation);GO:00310…	NA	NA	NA	jumonji and AT-rich interaction domain containing 2 [Source:HGNC Symbol;Acc:HGNC:6196]	28.3162	31.1678	26.6189	26.401	21.3036	13.9029	15.4665	17.3835	6.40821	5.18814	4.87676	5.96437	4.15579	8.8873	5.32443	5.11003	5.37855
ENSGALG00000009628		ENSGALT00000015681	GO:0043235(receptor complex);GO:0008277(regulation of G-protein coupled receptor protein signaling pathway)	NA	NA	NA		178.855	155.436	141.975	77.1904	74.2445	17.3716	17.3154	12.3138	4.97088	3.98729	8.63304	3.72763	3.47549	20.4402	9.5949	9.54781	12.4847
ENSGALG00000033293		ENSGALT00000065452	NA	NA	NA	NA		22.3755	17.4093	16.5212	12.973	11.9382	5.51298	8.30889	6.37805	2.16222	1.3596	2.15351	3.05362	3.92348	3.17602	1.78397	2.82966	2.90498
ENSGALG00000030012	EMILIN3	ENSGALT00000075849	GO:0005737(cytoplasm)	NA	NA	NA	elastin microfibril interfacer 3 [Source:HGNC Symbol;Acc:HGNC:16123]	16.283	13.7029	12.1614	15.5824	13.1602	2.9072	4.02008	4.22874	0.795906	0.717234	0.59533	3.34868	1.91532	0.606509	0.988951	0.776569	1.17708
ENSGALG00000013948	RASL11B	ENSGALT00000022604	GO:0030512(negative regulation of transforming growth factor beta receptor signaling pathway);GO:0005160(transforming growth factor beta receptor binding);GO:0005525(GTP binding);GO:0003924(GTPase activity);GO:0000166(nucleotide binding);GO:0007165(signal transduction);GO:0016020(membrane)	NA	NA	NA	RAS like family 11 member B [Source:HGNC Symbol;Acc:HGNC:23804]	8.57897	6.39162	6.70836	2.35574	5.18391	3.16522	4.36465	3.38866	1.07325	0.821444	1.14176	0.741508	0.596001	0.404227	0.289298	0.237635	0.25843
ENSGALG00000004319	NUDT13	ENSGALT00000006875	GO:0016787(hydrolase activity);GO:0046872(metal ion binding)	NA	NA	NA	nudix hydrolase 13 [Source:HGNC Symbol;Acc:HGNC:18827]	10.4288	13.8443	10.6545	20.8424	12.7565	6.49371	9.39308	9.16824	2.10795	1.28944	1.00109	1.03658	0.908785	1.35339	1.66329	0.639383	0.536479
ENSGALG00000011532		ENSGALT00000083093;ENSGALT00000018803	GO:0020037(heme binding);GO:0016705(oxidoreductase activity, acting on paired donors, with incorporation or reduction of molecular oxygen);GO:0004497(monooxygenase activity);GO:0005506(iron ion binding);GO:0046872(metal ion binding);GO:0055114(oxidation-reduction process);GO:0016491(oxidoreductase activity);GO:0016491(oxidoreductase activity)	NA	NA	NA		15.0397	17.5	13.0645	2.42164	3.7249	3.80591	1.15989	2.95924	1.20744	0.426836	0.185717	0.481361	0.19248	0.314089	0.295391	0.138456	0.169846
ENSGALG00000025743	CDR2	ENSGALT00000046055	GO:0005737(cytoplasm)	NA	NA	NA	cerebellar degeneration related protein 2 [Source:HGNC Symbol;Acc:HGNC:1799]	15.3901	15.1842	15.3392	11.4594	11.3965	3.9673	3.27082	4.6327	1.50494	0.817321	0.841145	0.870528	1.5012	3.68644	1.11129	1.05656	0.992219
ENSGALG00000003091	PARN	ENSGALT00000004886	GO:0003676(nucleic acid binding);GO:0006402(mRNA catabolic process);GO:0043169(cation binding);GO:0019901(protein kinase binding);GO:0003723(RNA binding);GO:0004535(poly(A)-specific ribonuclease activity);GO:0046872(metal ion binding);GO:0005737(cytoplasm);GO:0005634(nucleus);GO:0032212(positive regulation of telomere maintenance via telomerase);GO:0051973(positive regulation of telomerase activi…	03018(RNA degradation)	K01148	EC:3.1.13.4	poly(A)-specific ribonuclease PARN [Source:RefSeq peptide;Acc:NP_001025800]	25.6448	24.8272	24.4106	11.1824	11.6246	8.4315	7.63005	8.11548	3.48398	3.80171	1.93647	2.80833	2.15773	3.52451	3.54508	2.76392	1.33119
ENSGALG00000012237	POLE2	ENSGALT00000064280;ENSGALT00000019982;ENSGALT00000088160;ENSGALT00000073005	GO:0042276(error-prone translesion synthesis);GO:0003887(DNA-directed DNA polymerase activity);GO:0006261(DNA-dependent DNA replication);GO:0008622(epsilon DNA polymerase complex);GO:0006260(DNA replication);GO:0016779(nucleotidyltransferase activity);GO:0005634(nucleus);GO:0003677(DNA binding);GO:0016740(transferase activity);GO:0005654(nucleoplasm);GO:0016604(nuclear body);GO:0043231(intracellu…	00230(Purine metabolism);00240(Pyrimidine metabolism);03030(DNA replication);03410(Base excision repair);03420(Nucleotide excision repair);03420(Nucleotide excision repair)	K02325	EC:2.7.7.7	DNA polymerase epsilon 2, accessory subunit [Source:HGNC Symbol;Acc:HGNC:9178]	20.2984	20.2686	21.9229	10.5285	9.73059	7.71714	5.67715	6.69247	3.15255	1.67134	2.41153	2.4212	2.25981	5.14378	1.97078	2.30659	1.76206
ENSGALG00000030022	FANCL	ENSGALT00000067764;ENSGALT00000066000;ENSGALT00000087145;ENSGALT00000046791	GO:0043240(Fanconi anaemia nuclear complex);GO:0043231(intracellular membrane-bounded organelle);GO:0016604(nuclear body);GO:0005635(nuclear envelope);GO:0042127(regulation of cell proliferation);GO:0007276(gamete generation);GO:0006974(cellular response to DNA damage stimulus);GO:0006513(protein monoubiquitination);GO:0006281(DNA repair);GO:0061630(ubiquitin protein ligase activity);GO:0031625(u…	04120(Ubiquitin mediated proteolysis);03460(Fanconi anemia pathway);03460(Fanconi anemia pathway)	K10606	EC:2.3.2.27	Fanconi anemia complementation group L [Source:HGNC Symbol;Acc:HGNC:20748]	17.7242	16.4609	14.0215	5.53623	5.5428	4.19134	2.06121	3.8447	1.28304	0.669096	0.460285	0.394753	0.584082	0.89488	0.647373	0.798038	0.143284
ENSGALG00000014490		ENSGALT00000023392	GO:0032963(collagen metabolic process);GO:0019797(procollagen-proline 3-dioxygenase activity);GO:0031418(L-ascorbic acid binding);GO:0016705(oxidoreductase activity, acting on paired donors, with incorporation or reduction of molecular oxygen);GO:0019511(peptidyl-proline hydroxylation);GO:0005783(endoplasmic reticulum);GO:0016491(oxidoreductase activity);GO:0005506(iron ion binding);GO:0055114(ox…	NA	NA	NA		15.5239	14.3529	11.7233	19.6628	12.5591	8.21642	11.0221	9.67653	1.94263	1.5291	1.55317	1.546	1.45932	1.70458	0.623062	1.83472	0.584168
ENSGALG00000008778	SPRED2	ENSGALT00000067005;ENSGALT00000014275	GO:0005886(plasma membrane);GO:0019901(protein kinase binding);GO:0043517(positive regulation of DNA damage response, signal transduction by p53 class mediator);GO:0031410(cytoplasmic vesicle);GO:0005173(stem cell factor receptor binding);GO:0030291(protein serine/threonine kinase inhibitor activity);GO:0000188(inactivation of MAPK activity);GO:0010801(negative regulation of peptidyl-threonine ph…	NA	NA	NA	sprouty related EVH1 domain containing 2 [Source:HGNC Symbol;Acc:HGNC:17722]	67.5695	64.7359	61.593	48.4017	37.2175	19.0577	23.7495	19.7485	11.9092	12.0671	10.6206	9.49916	9.26104	14.7399	13.9816	9.80181	16.9862
ENSGALG00000016823		ENSGALT00000027160	GO:0005667(transcription factor complex);GO:0005634(nucleus);GO:2000278(regulation of DNA biosynthetic process);GO:0070345(negative regulation of fat cell proliferation);GO:0045944(positive regulation of transcription from RNA polymerase II promoter);GO:0045893(positive regulation of transcription, DNA-templated);GO:0043276(anoikis);GO:0008544(epidermis development);GO:0006355(regulation of trans…	04350(TGF-beta signaling pathway);04110(Cell cycle)	K04683	NA		32.904	29.9979	34.305	12.4542	14.2798	9.60142	7.80283	7.62211	5.64192	5.33667	3.8829	6.67182	4.95059	5.45887	6.23067	5.45399	4.2778
ENSGALG00000024081	TGIF2	ENSGALT00000058011;ENSGALT00000030938	GO:0005654(nucleoplasm);GO:0045666(positive regulation of neuron differentiation);GO:0000122(negative regulation of transcription from RNA polymerase II promoter);GO:0060041(retina development in camera-type eye);GO:0010470(regulation of gastrulation);GO:0038092(nodal signaling pathway);GO:0006355(regulation of transcription, DNA-templated);GO:0005634(nucleus);GO:0003677(DNA binding);GO:0003677(D…	04350(TGF-beta signaling pathway);04350(TGF-beta signaling pathway)	K19553	NA	TGFB induced factor homeobox 2 [Source:HGNC Symbol;Acc:HGNC:15764]	13.4755	15.9426	14.2247	6.79271	9.14021	4.69524	5.3732	4.19515	1.85788	1.86279	2.76076	0.921007	1.37847	1.23059	1.55582	1.33492	2.63912
ENSGALG00000000581	DDX42	ENSGALT00000000811;ENSGALT00000088124	GO:0016607(nuclear speck);GO:0016020(membrane);GO:0005829(cytosol);GO:0005737(cytoplasm);GO:0005634(nucleus);GO:0008104(protein localization);GO:0003723(RNA binding);GO:0003676(nucleic acid binding);GO:0005524(ATP binding);GO:0042981(regulation of apoptotic process);GO:0042981(regulation of apoptotic process)	03040(Spliceosome);03040(Spliceosome)	K12835	EC:3.6.4.13	DEAD-box helicase 42 [Source:HGNC Symbol;Acc:HGNC:18676]	50.1986	49.4139	51.0021	37.2934	35.5722	28.0254	28.3704	26.9262	16.1544	15.1769	12.5441	9.70391	10.1062	13.9174	11.8542	9.10928	8.17734
ENSGALG00000008114		ENSGALT00000065547;ENSGALT00000069504;ENSGALT00000013171;ENSGALT00000086235;ENSGALT00000084092;ENSGALT00000071779	GO:0031966(mitochondrial membrane);GO:0015075(ion transmembrane transporter activity);GO:0034220(ion transmembrane transport);GO:0006811(ion transport);GO:0055085(transmembrane transport);GO:0005739(mitochondrion);GO:0016021(integral component of membrane);GO:0016020(membrane);GO:0016020(membrane)	NA	NA	NA		11.6009	14.8145	11.4538	3.79412	4.01096	2.9938	3.08271	4.68709	1.18995	1.1362	1.21538	0.536505	0.895332	1.96393	0.462392	0.44067	0.542387
ENSGALG00000042357	ARHGAP1	ENSGALT00000053465;ENSGALT00000079282	GO:0045296(cadherin binding);GO:0070062(extracellular exosome);GO:0005737(cytoplasm);GO:0007264(small GTPase mediated signal transduction);GO:0005096(GTPase activator activity);GO:0010008(endosome membrane);GO:0048471(perinuclear region of cytoplasm);GO:0097443(sorting endosome);GO:0017137(Rab GTPase binding);GO:0032439(endosome localization);GO:0033572(transferrin transport);GO:0098706(ferric ir…	NA	NA	NA	Rho GTPase activating protein 1 [Source:HGNC Symbol;Acc:HGNC:673]	56.2809	51.5391	55.744	34.2573	27.869	14.6519	14.4658	15.7971	8.65515	8.27942	8.87534	8.91317	8.67237	15.9132	9.82806	11.8484	12.8485
ENSGALG00000037695	OSR2	ENSGALT00000072369	GO:0009790(embryo development);GO:0060021(palate development);GO:0043565(sequence-specific DNA binding);GO:0045893(positive regulation of transcription, DNA-templated);GO:0001823(mesonephros development);GO:0010628(positive regulation of gene expression);GO:0005634(nucleus);GO:0045944(positive regulation of transcription from RNA polymerase II promoter);GO:0000122(negative regulation of transcrip…	NA	NA	NA	odd-skipped related transciption factor 2 [Source:HGNC Symbol;Acc:HGNC:15830]	34.7723	35.9423	35.3469	14.7251	12.3077	21.7687	41.6196	22.4951	5.01512	4.10286	5.8428	5.23065	3.34989	5.76546	1.60616	3.2089	4.2236
ENSGALG00000002803	MTA1	ENSGALT00000004434;ENSGALT00000078962;ENSGALT00000054376	GO:0003682(chromatin binding);GO:0043565(sequence-specific DNA binding);GO:0003700(transcription factor activity, sequence-specific DNA binding);GO:0006355(regulation of transcription, DNA-templated);GO:0008270(zinc ion binding);GO:0005634(nucleus);GO:0003677(DNA binding);GO:0043161(proteasome-mediated ubiquitin-dependent protein catabolic process);GO:0010212(response to ionizing radiation);GO:00…	NA	NA	NA	metastasis associated 1 [Source:HGNC Symbol;Acc:HGNC:7410]	65.55	65.0148	64.3455	55.5772	52.9538	37.0343	38.9831	42.9513	13.5185	13.1085	12.0581	11.1513	11.0561	20.5641	15.0875	14.4828	17.3111
ENSGALG00000031331	PKIG	ENSGALT00000047845	GO:0000122(negative regulation of transcription from RNA polymerase II promoter);GO:0006469(negative regulation of protein kinase activity);GO:0004862(cAMP-dependent protein kinase inhibitor activity);GO:0042308(negative regulation of protein import into nucleus)	NA	NA	NA	cAMP-dependent protein kinase inhibitor gamma [Source:HGNC Symbol;Acc:HGNC:9019]	80.2241	86.9192	87.9835	18.5	20.7357	22.4247	14.7684	18.9505	7.05493	7.2403	7.92529	6.12164	6.48043	18.8924	8.02615	6.90898	6.7695
ENSGALG00000039322	DDR2	ENSGALT00000078216;ENSGALT00000062233	GO:0018108(peptidyl-tyrosine phosphorylation);GO:0005518(collagen binding);GO:0005925(focal adhesion);GO:0046777(protein autophosphorylation);GO:0004714(transmembrane receptor protein tyrosine kinase activity);GO:0005886(plasma membrane);GO:0070062(extracellular exosome);GO:0031214(biomineral tissue development);GO:0015629(actin cytoskeleton);GO:0010763(positive regulation of fibroblast migration…	NA	NA	NA	discoidin domain receptor tyrosine kinase 2 [Source:HGNC Symbol;Acc:HGNC:2731]	29.6052	28.9875	28.7974	17.4963	17.6802	11.3013	15.3792	11.5626	2.86132	1.51175	3.54391	3.28861	2.50026	4.06963	1.98933	2.04999	5.13387
ENSGALG00000007673	LRRC59	ENSGALT00000012441;ENSGALT00000046779;ENSGALT00000048742;ENSGALT00000088897	GO:0042645(mitochondrial nucleoid);GO:0016020(membrane);GO:0005783(endoplasmic reticulum);GO:0045296(cadherin binding);GO:0003723(RNA binding);GO:0003723(RNA binding)	NA	NA	NA	leucine rich repeat containing 59 [Source:HGNC Symbol;Acc:HGNC:28817]	45.4357	39.9721	47.0336	31.97	25.442	17.469	17.8113	16.8069	7.87707	5.90993	9.01654	7.36131	7.64836	13.4606	6.3434	5.88957	5.09485
ENSGALG00000025972	SELM	ENSGALT00000045782	GO:0010269(response to selenium ion);GO:0035264(multicellular organism growth);GO:0035934(corticosterone secretion);GO:0042445(hormone metabolic process);GO:0060612(adipose tissue development);GO:0005783(endoplasmic reticulum);GO:0005794(Golgi apparatus)	NA	NA	NA	selenoprotein M precursor [Source:RefSeq peptide;Acc:NP_001264788]	53.3576	52.5548	49.3867	37.169	40.9213	20.9849	27.719	16.0058	7.46173	5.03338	8.39806	10.3196	7.99364	9.51411	5.24955	8.76286	10.2841
ENSGALG00000035932	ZC2HC1A	ENSGALT00000080944	NA	NA	NA	NA	zinc finger C2HC-type containing 1A [Source:HGNC Symbol;Acc:HGNC:24277]	21.3404	30.7501	25.8686	39.1679	34.6429	13.2087	18.8942	16.6328	4.3365	5.28654	3.82388	3.85692	4.94562	2.76437	7.64834	4.21917	4.21593
ENSGALG00000038251		ENSGALT00000055895	NA	NA	NA	NA		11.4635	9.41266	8.99598	6.6377	5.65986	2.02525	2.68804	1.91264	0.235455	0.14154	0.409564	0.579218	0.408669	0.144316	0.05132	0.382911	0.143506
ENSGALG00000002427	SMIM5	ENSGALT00000003817	GO:0016021(integral component of membrane);GO:0016020(membrane)	NA	NA	NA	small integral membrane protein 5 [Source:HGNC Symbol;Acc:HGNC:40030]	14.4095	12.5466	12.5606	28.7574	25.2903	10.413	10.8087	11.0722	2.95853	3.26415	2.77246	0.864781	2.02917	2.55358	2.17267	2.79404	1.09415
ENSGALG00000002272	NOC4L	ENSGALT00000003564	GO:0005730(nucleolus);GO:0005634(nucleus);GO:0003723(RNA binding);GO:0030692(Noc4p-Nop14p complex);GO:0042254(ribosome biogenesis);GO:0000462(maturation of SSU-rRNA from tricistronic rRNA transcript (SSU-rRNA, 5.8S rRNA, LSU-rRNA));GO:0032040(small-subunit processome);GO:0016021(integral component of membrane);GO:0016020(membrane)	NA	NA	NA	nucleolar complex associated 4 homolog [Source:HGNC Symbol;Acc:HGNC:28461]	43.5779	35.1961	41.2376	14.7417	16.0067	14.2408	8.5597	13.1557	6.36984	6.21543	5.26041	3.4852	3.65058	8.32529	5.63833	4.49925	5.08398
ENSGALG00000001652		ENSGALT00000089134;ENSGALT00000002523;ENSGALT00000088171;ENSGALT00000054542;ENSGALT00000089697	GO:0032154(cleavage furrow);GO:0005819(spindle);GO:0005938(cell cortex);GO:0060170(ciliary membrane);GO:0060271(cilium assembly);GO:0007224(smoothened signaling pathway);GO:0007049(cell cycle);GO:0051301(cell division);GO:0030496(midbody);GO:0042995(cell projection);GO:0005525(GTP binding);GO:0005856(cytoskeleton);GO:0005737(cytoplasm);GO:0005886(plasma membrane);GO:0000166(nucleotide binding);GO…	NA	NA	NA	Septin-2 [Source:UniProtKB/Swiss-Prot;Acc:Q5ZMH1]	132.394	124.334	130.502	91.4149	95.4853	67.7687	53.9184	57.246	36.7448	29.9333	24.6566	30.7785	28.0424	27.3266	25.5575	34.6054	23.0423
ENSGALG00000036095	BICC1	ENSGALT00000052159	GO:0090090(negative regulation of canonical Wnt signaling pathway);GO:0003723(RNA binding);GO:0007507(heart development);GO:0007368(determination of left/right symmetry)	NA	NA	NA	protein bicaudal C homolog 1 [Source:RefSeq peptide;Acc:NP_001186436]	36.4823	28.0467	29.8086	18.3159	20.5035	11.8964	12.3133	14.5914	5.97321	5.27563	5.34722	5.69565	3.90061	6.62352	7.9876	5.69836	7.96784
ENSGALG00000029197	KIRREL3	ENSGALT00000073846;ENSGALT00000070667;ENSGALT00000047321;ENSGALT00000079724	NA	NA	NA	NA	kirre like nephrin family adhesion molecule 3 [Source:HGNC Symbol;Acc:HGNC:23204]	13.6124	19.7836	22.034	5.11914	16.0457	1.57135	1.2714	2.04174	1.58468	0.392653	1.01479	0.625796	0.083897	0.63339	0.255836	0.210356	0.445728
ENSGALG00000015854	PGM3	ENSGALT00000025559	GO:0071704(organic substance metabolic process);GO:0030097(hemopoiesis);GO:0019255(glucose 1-phosphate metabolic process);GO:0007283(spermatogenesis);GO:0006493(protein O-linked glycosylation);GO:0006487(protein N-linked glycosylation);GO:0006048(UDP-N-acetylglucosamine biosynthetic process);GO:0016868(intramolecular transferase activity, phosphotransferases);GO:0004614(phosphoglucomutase activit…	00520(Amino sugar and nucleotide sugar metabolism)	K01836	EC:5.4.2.3	phosphoglucomutase 3 [Source:HGNC Symbol;Acc:HGNC:8907]	40.1945	37.237	37.6286	19.1701	17.3488	5.82191	4.37923	6.37964	3.79801	2.89183	3.03332	4.25725	2.37211	9.44337	4.28595	4.23979	4.27778
ENSGALG00000030251	ADCY8	ENSGALT00000058384;ENSGALT00000073355	NA	00230(Purine metabolism);04371(Apelin signaling pathway);04020(Calcium signaling pathway);04114(Oocyte meiosis);04540(Gap junction);04912(GnRH signaling pathway);04914(Progesterone-mediated oocyte maturation);04916(Melanogenesis);04261(Adrenergic signaling in cardiomyocytes);04270(Vascular smooth muscle contraction);04270(Vascular smooth muscle contraction)	K08048	EC:4.6.1.1	adenylate cyclase 8 [Source:HGNC Symbol;Acc:HGNC:239]	4.18511	2.68224	4.34498	0.912847	0.982373	0.25232	0.092274	0.321892	0.192918	0.030776	0.1035	0.055161	0.020419	0.012786	0.023917	0.088889	0.024783
ENSGALG00000002922	NOTCH2	ENSGALT00000039988	GO:0043235(receptor complex);GO:0009986(cell surface);GO:0016020(membrane);GO:0005887(integral component of plasma membrane);GO:0005886(plasma membrane);GO:0005654(nucleoplasm);GO:0005634(nucleus);GO:0060413(atrial septum morphogenesis);GO:0046849(bone remodeling);GO:0046579(positive regulation of Ras protein signal transduction);GO:0009887(animal organ morphogenesis);GO:0007219(Notch signaling p…	04330(Notch signaling pathway)	K20994	NA	notch 2 [Source:HGNC Symbol;Acc:HGNC:7882]	212.614	170.503	189.115	91.8503	86.4875	46.4827	40.1429	41.7587	17.0138	13.0058	17.9185	14.6062	17.4171	40.3906	14.5125	21.0038	34.6097
ENSGALG00000002197	NPM1	ENSGALT00000003436;ENSGALT00000085124;ENSGALT00000073593;ENSGALT00000089096	GO:0031616(spindle pole centrosome);GO:0030529(intracellular ribonucleoprotein complex);GO:0016607(nuclear speck);GO:0016020(membrane);GO:0015935(small ribosomal subunit);GO:0015934(large ribosomal subunit);GO:0005925(focal adhesion);GO:0005829(cytosol);GO:0005813(centrosome);GO:0005737(cytoplasm);GO:0005730(nucleolus);GO:0005654(nucleoplasm);GO:0005634(nucleus);GO:0001652(granular component);GO:…	NA	NA	NA	nucleophosmin 1 [Source:HGNC Symbol;Acc:HGNC:7910]	471.52	688.682	674.704	493.444	382.584	325.657	258.82	349.884	152.632	105.905	83.5986	92.0266	71.4761	130.999	83.0817	106.46	73.1914
ENSGALG00000019794	MSTO1	ENSGALT00000023596	GO:0005741(mitochondrial outer membrane);GO:0005737(cytoplasm);GO:0048311(mitochondrion distribution);GO:0007005(mitochondrion organization);GO:0003924(GTPase activity);GO:0005739(mitochondrion)	NA	NA	NA	misato 1, mitochondrial distribution and morphology regulator [Source:HGNC Symbol;Acc:HGNC:29678]	23.4381	28.0539	24.95	11.5551	10.731	12.6863	7.51541	9.34862	3.91135	3.13903	2.4508	2.18236	3.08156	3.04761	3.48939	1.62491	1.47777
ENSGALG00000026091	CACNG4	ENSGALT00000042721	GO:0032281(AMPA glutamate receptor complex);GO:2000311(regulation of AMPA receptor activity);GO:0070588(calcium ion transmembrane transport);GO:0006816(calcium ion transport);GO:0019226(transmission of nerve impulse);GO:0016247(channel regulator activity);GO:0005262(calcium channel activity);GO:0005245(voltage-gated calcium channel activity);GO:0005891(voltage-gated calcium channel complex);GO:00…	04010(MAPK signaling pathway);04260(Cardiac muscle contraction);04261(Adrenergic signaling in cardiomyocytes)	K04869	NA	calcium voltage-gated channel auxiliary subunit gamma 4 [Source:HGNC Symbol;Acc:HGNC:1408]	9.93608	11.0697	15.7824	5.75584	2.81211	0.64269	0.507962	1.11663	0.207953	0.247869	0.212919	0.392616	0.544385	0.231879	0.232259	0.205593	0
ENSGALG00000012136	MPPED2	ENSGALT00000019825	GO:0016787(hydrolase activity)	NA	NA	NA	metallophosphoesterase domain containing 2 [Source:HGNC Symbol;Acc:HGNC:1180]	39.3647	38.12	39.2196	31.9548	30.7871	14.3284	14.0607	12.8854	7.66374	10.8428	6.61269	6.89296	8.46769	7.67839	6.62972	6.70841	6.11643
ENSGALG00000015978	PANK2	ENSGALT00000083695;ENSGALT00000054838;ENSGALT00000025750;ENSGALT00000068808	GO:0005829(cytosol);GO:0005739(mitochondrion);GO:0007286(spermatid development);GO:0070584(mitochondrion morphogenesis);GO:0004594(pantothenate kinase activity);GO:0015937(coenzyme A biosynthetic process);GO:0051881(regulation of mitochondrial membrane potential);GO:0009060(aerobic respiration);GO:0019217(regulation of fatty acid metabolic process);GO:0090207(regulation of triglyceride metabolic …	00770(Pantothenate and CoA biosynthesis);00770(Pantothenate and CoA biosynthesis)	K09680	EC:2.7.1.33	pantothenate kinase 2 [Source:HGNC Symbol;Acc:HGNC:15894]	17.8669	17.8793	20.2285	12.8153	11.7872	5.48943	7.20451	7.14938	2.79829	3.50636	3.59947	3.03942	2.69041	3.89571	3.11479	3.24207	2.98023
ENSGALG00000039733		ENSGALT00000068455	NA	NA	NA	NA		21.8395	20.5227	19.1234	11.6239	9.78866	14.2564	8.66176	7.91594	1.34215	1.5609	1.78261	1.22905	1.27693	2.90704	2.07367	2.55216	3.26781
ENSGALG00000003108	SMG6	ENSGALT00000004908;ENSGALT00000084999;ENSGALT00000058580;ENSGALT00000005046	GO:0035145(exon-exon junction complex);GO:0005829(cytosol);GO:0005737(cytoplasm);GO:0005730(nucleolus);GO:0005697(telomerase holoenzyme complex);GO:0005634(nucleus);GO:0000333(telomerase catalytic core complex);GO:1904354(negative regulation of telomere capping);GO:0043487(regulation of RNA stability);GO:0007004(telomere maintenance via telomerase);GO:0000184(nuclear-transcribed mRNA catabolic pr…	03015(mRNA surveillance pathway);03015(mRNA surveillance pathway)	K11124	EC:3.1.-.-	SMG6, nonsense mediated mRNA decay factor [Source:HGNC Symbol;Acc:HGNC:17809]	40.5932	44.9016	41.9541	33.6765	37.3005	28.1177	28.0716	28.321	14.2815	13.3303	12.5065	8.07743	10.4449	11.3813	11.0022	11.6543	11.1605
ENSGALG00000014263	PHC1	ENSGALT00000023070;ENSGALT00000089871	GO:0035102(PRC1 complex);GO:0031519(PcG protein complex);GO:0005634(nucleus);GO:0016574(histone ubiquitination);GO:0008270(zinc ion binding);GO:0008270(zinc ion binding)	NA	NA	NA	polyhomeotic homolog 1 [Source:HGNC Symbol;Acc:HGNC:3182]	20.816	19.0558	17.4657	11.8127	12.6957	9.49271	10.8803	11.1538	5.14257	3.75173	4.30692	4.0245	3.77144	4.98647	3.63736	3.40014	2.45044
[truncated: 2,576 more rows]

## Sheet: profile12
Table S3. The genes of the significant profiles by the STEM analysis(profile 12)
[truncated: 694 more rows]

## Sheet: profile25
Table S3. The genes of the significant profiles by the STEM analysis(profile 25)
[truncated: 718 more rows]

## Sheet: profile39
Table S3. The genes of the significant profiles by the STEM analysis(profile 39)
[truncated: 381 more rows]

[truncated: 1 more sheets: profile49]
